# Supplementary material for: Complete genomes of Asgard archaea reveal diverse integrated and mobile genetic elements
Source: HighWire-hosted journal article supplement (doi:10.1101/gr.279480.124), 2024-10-01
Supplement: Supplemental_Table_S12.xlsx [file Supplemental_Table_S12.xlsx]

## Sheet: Caption
Supplemental Table 12. Excel File, GTPase structural phylogeny statistics: First sheet shows the top hits of the search of the RCSB database and the following two show the matrixes for the structural alignments.

## Sheet: Info
RCSB Accession	Protein match	Organism/Group	Legend	Method used to obtain structure	pTM	Origin	ID_Supplemental_Figure9
1a2b	N/A	Homo sapiens	Mammalia	X-Ray Diffraction	NA	Ihara, K., Muraguchi, S., Kato, M., Shimizu, T., Shirakawa, M., Kuroda, S., Kaibuchi, K. and Hakoshima, T., 1998. Crystal structure of human RhoA in a dominantly active form complexed with a GTP analogue. Journal of Biological Chemistry, 273(16), pp.9656-9666.	Hsa_1a2b
1ksg	N/A	Mus musculus	Mammalia	X-Ray Diffraction	NA	Hanzal-Bayer, M., Renault, L., Roversi, P., Wittinghofer, A. and Hillig, R.C., 2002. The complex of Arl2-GTP and PDEδ: from structure to function. The EMBO journal, 21(9), pp.2095-2106.	Mmu_1ksg
1ksj	N/A	Mus musculus	Mammalia	X-Ray Diffraction	NA	Hanzal-Bayer, M., Renault, L., Roversi, P., Wittinghofer, A. and Hillig, R.C., 2002. The complex of Arl2-GTP and PDEδ: from structure to function. The EMBO journal, 21(9), pp.2095-2106.	Mmu_1ksj
1nvv	N/A	Homo sapiens	Mammalia	X-Ray Diffraction	NA	Margarit, S.M., Sondermann, H., Hall, B.E., Nagar, B., Hoelz, A., Pirruccello, M., Bar-Sagi, D. and Kuriyan, J., 2003. Structural evidence for feedback activation by Ras· GTP of the Ras-specific nucleotide exchange factor SOS. Cell, 112(5), pp.685-695.	Hsa_1nvv
1qbk	N/A	Homo sapiens	Mammalia	X-Ray Diffraction	NA	Chook, Y.M. and Blobel, G., 1999. Structure of the nuclear transport complex karyopherin-β2–Ran GppNHp. Nature, 399(6733), pp.230-237.	Hsa_1qbk
1qg2	N/A	Canis lupus familiaris	Mammalia	X-Ray Diffraction	NA	Kent, H.M., Moore, M.S., Quimby, B.B., Baker, A.M., McCoy, A.J., Murphy, G.A., Corbett, A.H. and Stewart, M., 1999. Engineered mutants in the switch II loop of Ran define the contribution made by key residues to the interaction with nuclear transport factor 2 (NTF2) and the role of this interaction in nuclear protein import. Journal of molecular biology, 289(3), pp.565-577.	Clu_1qg2
1yzq	N/A	Homo sapiens	Mammalia	X-Ray Diffraction	NA	Eathiraj, S., Pan, X., Ritacco, C. and Lambright, D.G., 2005. Structural basis of family-wide Rab GTPase recognition by rabenosyn-5. Nature, 436(7049), pp.415-419.	Hsa_1yzq
1z2c	N/A	Homo sapiens	Mammalia	X-Ray Diffraction	NA	Rose, R., Weyand, M., Lammers, M., Ishizaki, T., Ahmadian, M.R. and Wittinghofer, A., 2005. Structural and mechanistic insights into the interaction between Rho and mammalian Dia. Nature, 435(7041), pp.513-518.	Hsa_1z2c
4m9q	N/A	Chlamydomonas reinhardtii	MicroEukaryote	X-Ray Diffraction	NA	Miertzschke, M., Koerner, C., Spoerner, M. and Wittinghofer, A., 2014. Structural insights into the small G-protein Arl13B and implications for Joubert syndrome. Biochemical Journal, 457(2), pp.301-311.	Cre_4m9q
4uj4	N/A	Homo sapiens	Mammalia	X-Ray Diffraction	NA	Vetter, M., Stehle, R., Basquin, C. and Lorentzen, E., 2015. Structure of Rab11–FIP3–Rabin8 reveals simultaneous binding of FIP3 and Rabin8 effectors to Rab11. Nature structural & molecular biology, 22(9), pp.695-702.	Hsa_4uj4
4v0m	N/A	Chlamydomonas reinhardtii	MicroEukaryote	X-Ray Diffraction	NA	Mourão, A., Nager, A.R., Nachury, M.V. and Lorentzen, E., 2014. Structural basis for membrane targeting of the BBSome by ARL6. Nature structural & molecular biology, 21(12), pp.1035-1041.	Cre_4v0m
5uhv	N/A	Homo sapiens	Mammalia	X-Ray Diffraction	NA	Johnson, C.W., Reid, D., Parker, J.A., Salter, S., Knihtila, R., Kuzmic, P. and Mattos, C., 2017. The small GTPases K-Ras, N-Ras, and H-Ras have distinct biochemical properties determined by allosteric effects. Journal of Biological Chemistry, 292(31), pp.12981-12993.	Hsa_5uhv
6ces	N/A	Homo sapiens	Mammalia	Electron Microscopy	NA	Shen, K., Huang, R.K., Brignole, E.J., Condon, K.J., Valenstein, M.L., Chantranupong, L., Bomaliyamu, A., Choe, A., Hong, C., Yu, Z. and Sabatini, D.M., 2018. Architecture of the human GATOR1 and GATOR1–Rag GTPases complexes. Nature, 556(7699), pp.64-69.	Hsa_6ces
6gog	N/A	Homo sapiens	Mammalia	X-Ray Diffraction	NA	Cruz-Migoni, A., Canning, P., Quevedo, C.E., Bataille, C.J., Bery, N., Miller, A., Russell, A.J., Phillips, S.E., Carr, S.B. and Rabbitts, T.H., 2019. Structure-based development of new RAS-effector inhibitors from a combination of active and inactive RAS-binding compounds. Proceedings of the National Academy of Sciences, 116(7), pp.2545-2550.	Hsa_6gog
6nzd	N/A	Homo sapiens	Mammalia	Electron Microscopy	NA	Lawrence, R.E., Fromm, S.A., Fu, Y., Yokom, A.L., Kim, D.J., Thelen, A.M., Young, L.N., Lim, C.Y., Samelson, A.J., Hurley, J.H. and Zoncu, R., 2019. Structural mechanism of a Rag GTPase activation checkpoint by the lysosomal folliculin complex. Science, 366(6468), pp.971-977.	Hsa_6nzd
6ulg	N/A	Homo sapiens	Mammalia	Electron Microscopy	NA	Shen, K., Rogala, K.B., Chou, H.T., Huang, R.K., Yu, Z. and Sabatini, D.M., 2019. Cryo-EM structure of the human FLCN-FNIP2-Rag-ragulator complex. Cell, 179(6), pp.1319-1329.	Hsa_6ulg
6v6v	N/A	Homo sapiens	Mammalia	X-Ray Diffraction	NA	Lin, Y., Lu, S., Zhang, J. and Zheng, Y., 2021. Structure of an inactive conformation of GTP-bound RhoA GTPase. Structure, 29(6), pp.553-563.	Hsa_6v6v
6zir	N/A	Homo sapiens	Mammalia	X-Ray Diffraction	NA	Kessler, D., Bergner, A., Böttcher, J., Fischer, G., Döbel, S., Hinkel, M., Müllauer, B., Weiss-Puxbaum, A. and McConnell, D.B., 2020. Drugging all RAS isoforms with one pocket. Future medicinal chemistry, 12(21), pp.1911-1923.	Hsa_6zir
7kfz	N/A	Homo sapiens	Mammalia	Electron Microscopy	NA	Moghadamchargari, Z., Shirzadeh, M., Liu, C., Schrecke, S., Packianathan, C., Russell, D.H., Zhao, M. and Laganowsky, A., 2021. Molecular assemblies of the catalytic domain of SOS with KRas and oncogenic mutants. Proceedings of the National Academy of Sciences, 118(12), p.e2022403118.	Hsa_7kfz
7opq	N/A	Homo sapiens	Mammalia	X-Ray Diffraction	NA	Jamshidiha, M., Lanyon-Hogg, T., Sutherell, C.L., Craven, G.B., Tersa, M., De Vita, E., Brustur, D., Pérez-Dorado, I., Hassan, S., Petracca, R. and Morgan, R.M., 2022. Identification of the first structurally validated covalent ligands of the small GTPase RAB27A. RSC Medicinal Chemistry, 13(2), pp.150-155.	Hsa_7opq
7rll	N/A	Candida albicans	Fungus	X-Ray Diffraction	NA	Not_published	Cal_7rll
7wqy	N/A	Ctenopharyngodon idella	Fish	X-Ray Diffraction	NA	Not_published	Cid_7wqy
7y4a	N/A	Homo sapiens	Mammalia	X-Ray Diffraction	NA	Tam, C., Kukimoto-Niino, M., Miyata-Yabuki, Y., Tsuda, K., Mishima-Tsumagari, C., Ihara, K., Inoue, M., Yonemochi, M., Hanada, K., Matsumoto, T. and Shirouzu, M., 2023. Targeting Ras-binding domain of ELMO1 by computational nanobody design. Communications Biology, 6(1), p.284.	Hsa_7y4a
N/A	Ata_3SR_VP_9_9_2021_72_4B_1_05m_2_scaffold_10132_42_10	Atabeyarchaeia	Asgard	ColabFold Model		This work	Atabeya-3_SR_VP_9_9_2021_72_4B_1_05m_2_scaffold_10132_42_10
N/A	Atabeya_2_FINAL_2143_8817b	Atabeyarchaeia	Asgard	ColabFold Model		This work	Atabeya-2_FINAL_SR_VP_26_10_2019_2_100cm_Atabeya_2_FINAL_1_2143
N/A	Atabeya_2_FINAL_2151_05530	Atabeyarchaeia	Asgard	ColabFold Model		This work	Atabeya-2_FINAL_SR_VP_26_10_2019_2_100cm_Atabeya_2_FINAL_1_2151
N/A	GokArlX1_0deb9_1_unrelaxed_rank_004_alphafold2_ptm_model_2_seed_000	Gefionella okellyi	MicroEukaryote	ColabFold Model		This work	GokArlX1
N/A	McaArl2_ba708_unrelaxed_rank_005_alphafold2_ptm_model_1_seed_000	Malawimonas californiana	MicroEukaryote	ColabFold Model		This work	McaArl2
N/A	NgrArl8_11b5b_unrelaxed_rank_005_alphafold2_ptm_model_1_seed_000	Naegleria gruberi	MicroEukaryote	ColabFold Model		This work	NgrArl8
N/A	PygArfrp1b_8f886_unrelaxed_rank_005_alphafold2_ptm_model_1_seed_000	Pygsuia biforma	MicroEukaryote	ColabFold Model		This work	PygArfrp1b
N/A	PygArl2_1480a_unrelaxed_rank_005_alphafold2_ptm_model_1_seed_000	Pygsuia biforma	MicroEukaryote	ColabFold Model		This work	PygArl2
N/A	PygArl8_7b5ad_unrelaxed_rank_004_alphafold2_ptm_model_1_seed_000	Pygsuia biforma	MicroEukaryote	ColabFold Model		This work	PygArl8
N/A	SRVP_Atabeyarchaeota_1_curatedFINAL_iMGExii_29	Atabeyarchaeia	Asgard	ColabFold Model		This work	Atabeya-1_iMGExii_29
N/A	SRVP_Atabeyarchaeota_1_curatedFINAL_iMGExii_6	Atabeyarchaeia	Asgard	ColabFold Model		This work	Atabeya-1_iMGExii_6
N/A	SRVP_Freyarchaeota_final_genomeNew_Freya_genome	Freyarchaeia	Asgard	ColabFold Model		This work	New_Freya_genome_for_curation_rev_3_marked_gaps_check_remap_1_1173
N/A	SsaArlX_fddf2_unrelaxed_rank_005_alphafold2_ptm_model_1_seed_000	Spironucleus salmonicida	MicroEukaryote	ColabFold Model		This work	SsaArlX

## Sheet: pairwise_rmsd
	1a2b	1ksg	1ksj	1nvv	1qbk	1qg2	1yzq	1z2c	4m9q	4uj4	4v0m	5uhv	6ces	6gog	6nzd	6ulg	6v6v	6zir	7kfz	7opq	7rll	7wqy	7y4a	Ata_3SR_VP_9_9_2021_72_4B_1_05m_2_scaffold_10132_42_10	Atabeya_2_FINAL_2143_8817b	Atabeya_2_FINAL_2151_05530	GokArlX1_0deb9_1_unrelaxed_rank_004_alphafold2_ptm_model_2_seed_000	McaArl2_ba708_unrelaxed_rank_005_alphafold2_ptm_model_1_seed_000	NgrArl8_11b5b_unrelaxed_rank_005_alphafold2_ptm_model_1_seed_000	PygArfrp1b_8f886_unrelaxed_rank_005_alphafold2_ptm_model_1_seed_000	PygArl2_1480a_unrelaxed_rank_005_alphafold2_ptm_model_1_seed_000	PygArl8_7b5ad_unrelaxed_rank_004_alphafold2_ptm_model_1_seed_000	SRVP_Atabeyarchaeota_1_curatedFINAL_iMGExii_29	SRVP_Atabeyarchaeota_1_curatedFINAL_iMGExii_6	SRVP_Atabeyarchaeota_29_797b7	SRVP_Atabeyarchaeota_6_defd8	SRVP_Freyarchaeota_final_genomeNew_Freya_genome	SsaArlX_fddf2_unrelaxed_rank_005_alphafold2_ptm_model_1_seed_000
1a2b	0	1.798	1.862	1.286	1.891	2.339	1.674	1.116	1.939	1.526	1.94	1.388	2.859	1.384	3.255	3.117	1.627	1.503	1.394	1.416	2.289	2.815	0.641	2.225	2.505	2.698	2.165	1.734	2.388	2.646	1.796	2.268	2.55	2.46	2.99	2.444	2.677	2.717
1ksg	1.798	0	0.884	4.599	2.135	2.865	2.031	3.634	4.152	3.816	1.257	2.168	3.71	3.849	3.86	3.627	2.201	2.106	2.496	3.433	2.156	2.951	3.601	2.012	2.332	2.579	2.485	1.163	2.144	2.337	1.228	2.129	1.958	2.092	2.769	2.076	3.213	2.25
1ksj	1.862	0.884	0	4.868	2.127	2.913	2.001	3.532	4.189	2.83	2.454	2.048	3.607	3.7	4.163	3.737	2.351	2.138	4.638	3.395	1.865	2.479	3.699	1.878	2.121	2.349	1.765	0.67	1.796	2.123	0.824	1.757	1.848	1.942	2.824	1.964	3.161	2.053
1nvv	1.286	4.599	4.868	0	7.577	2.752	1.479	8.505	6.065	6.715	7.764	0.68	8.541	7.434	9.11	8.867	2.208	0.781	1.243	5.09	2.661	3.146	6.595	2.812	2.726	3.141	2.385	1.931	2.463	2.946	1.994	2.353	2.722	2.966	3.282	2.935	4.344	2.648
1qbk	1.891	2.135	2.127	7.577	0	1.88	1.426	8.562	5.849	6.969	9.334	1.749	9.641	8.935	8.986	8.938	2.706	1.787	8.144	4.109	5.037	5.24	7.901	2.905	2.592	2.954	2.37	2.244	2.825	2.93	2.311	2.724	2.649	2.741	3.148	2.882	2.893	2.614
1qg2	2.339	2.865	2.913	2.752	1.88	0	2.333	2.435	2.954	2.944	2.447	2.127	3.719	3.298	3.508	3.616	2.535	2.112	2.756	2.306	2.424	2.826	3.169	3.12	2.774	3.23	2.739	2.362	3.094	2.663	2.36	2.845	3.085	3.249	3.27	3.053	2.872	3.045
1yzq	1.674	2.031	2.001	1.479	1.426	2.333	0	1.443	1.93	1.651	1.922	1.581	2.705	1.639	2.992	2.794	2.394	1.615	1.558	1.364	2.462	2.666	1.665	2.409	2.511	2.822	2.204	1.949	2.49	2.45	2.037	2.279	2.283	2.512	2.866	2.538	2.446	2.4
1z2c	1.116	3.634	3.532	8.505	8.562	2.435	1.443	0	5.342	7.369	8.789	1.739	9.629	8.178	9.201	8.685	1.87	1.914	6.22	3.539	3.954	4.71	9.486	2.335	2.599	3.281	2.818	2.342	2.846	2.85	2.676	2.459	2.558	2.774	3.127	2.762	3.849	2.859
4m9q	1.939	4.152	4.189	6.065	5.849	2.954	1.93	5.342	0	6.38	5.03	2.068	5.607	5.069	7.546	7.478	2.402	2.185	5.406	4.163	4.473	4.535	4.533	2.479	2.391	3.055	2.496	1.506	2.369	2.553	1.519	1.966	2.358	2.427	3.087	2.414	3.043	2.197
4uj4	1.526	3.816	2.83	6.715	6.969	2.944	1.651	7.369	6.38	0	9.527	1.593	10.378	9.651	10.676	10.59	2.216	1.52	8.33	6.739	5.319	3.359	9.482	2.65	2.512	2.905	2.676	1.936	2.991	2.949	1.976	2.751	2.351	2.732	3.097	2.69	2.955	2.963
4v0m	1.94	1.257	2.454	7.764	9.334	2.447	1.922	8.789	5.03	9.527	0	2.172	11.051	9.517	10.466	11.267	2.234	2.171	7.862	5.096	4.545	3.106	9.336	2.348	2.367	2.6	2.468	1.763	1.769	2.14	1.484	1.72	2.337	2.41	2.86	2.409	3.743	2.062
5uhv	1.388	2.168	2.048	0.68	1.749	2.127	1.581	1.739	2.068	1.593	2.172	0	3.057	0.859	3.054	3.083	2.294	0.918	0.995	1.067	2.496	2.752	1.19	2.786	2.715	3.004	2.424	2.053	2.52	2.629	2.127	2.295	2.661	2.902	3.35	2.876	2.622	2.659
6ces	2.859	3.71	3.607	8.541	9.641	3.719	2.705	9.629	5.607	10.378	11.051	3.057	0	9.123	4.741	4.98	3.293	3.063	8.631	5.643	6.495	4.597	9.362	1.884	2.073	2.377	2.843	2.569	2.723	3.18	2.6	2.596	1.832	2.252	2.391	2.281	2.373	2.294
6gog	1.384	3.849	3.7	7.434	8.935	3.298	1.639	8.178	5.069	9.651	9.517	0.859	9.123	0	8.262	9.26	2.341	0.827	7.02	2.626	3.477	3.948	7.317	3.098	2.997	3.582	3.052	2.614	3.199	3.157	2.609	3.19	3.154	3.139	3.625	3.115	4.593	2.784
6nzd	3.255	3.86	4.163	9.11	8.986	3.508	2.992	9.201	7.546	10.676	10.466	3.054	4.741	8.262	0	3.384	3.53	3.059	8.955	3.776	2.95	4.435	8.861	2.611	2.234	2.458	3.148	2.968	2.87	3.308	3.127	2.731	2.384	2.437	2.757	2.453	3.34	2.679
6ulg	3.117	3.627	3.737	8.867	8.938	3.616	2.794	8.685	7.478	10.59	11.267	3.083	4.98	9.26	3.384	0	3.546	3.137	9.189	7.327	3.174	4.238	8.484	2.692	2.17	2.773	3.13	3.317	3.321	3.43	3.161	3.19	2.519	2.512	2.853	2.536	3.395	2.882
6v6v	1.627	2.201	2.351	2.208	2.706	2.535	2.394	1.87	2.402	2.216	2.234	2.294	3.293	2.341	3.53	3.546	0	2.167	2.222	2.32	2.507	2.635	1.73	2.889	2.892	3.159	2.41	2.279	2.573	2.471	2.324	2.699	2.974	3.003	3.229	2.953	3.166	2.647
6zir	1.503	2.106	2.138	0.781	1.787	2.112	1.615	1.914	2.185	1.52	2.171	0.918	3.063	0.827	3.059	3.137	2.167	0	0.95	1.416	2.542	2.679	1.666	2.988	2.744	3.036	2.447	2.155	2.509	2.776	2.201	2.346	2.956	3.166	3.343	3.131	2.844	2.733
7kfz	1.394	2.496	4.638	1.243	8.144	2.756	1.558	6.22	5.406	8.33	7.862	0.995	8.631	7.02	8.955	9.189	2.222	0.95	0	4.453	3.373	3.909	7.21	2.883	3.018	3.206	2.728	2.129	3.162	3.166	2.107	3.191	3.049	3.144	3.717	3.129	2.804	2.909
7opq	1.416	3.433	3.395	5.09	4.109	2.306	1.364	3.539	4.163	6.739	5.096	1.067	5.643	2.626	3.776	7.327	2.32	1.416	4.453	0	3.346	3.432	4.005	2.673	2.662	3.208	2.874	2.51	2.726	3.22	2.586	2.529	2.657	2.862	3.085	2.844	3.208	2.641
7wqy	2.815	2.951	2.479	3.146	5.24	2.826	2.666	4.71	4.535	3.359	3.106	2.752	4.597	3.948	4.435	4.238	2.635	2.679	3.909	3.432	4.244	0	3.237	2.774	2.753	2.81	2.999	2.84	2.883	2.495	2.918	3.048	2.781	2.649	3.405	2.649	3.117	2.418
7y4a	0.641	3.601	3.699	6.595	7.901	3.169	1.665	9.486	4.533	9.482	9.336	1.19	9.362	7.317	8.861	8.484	1.73	1.666	7.21	4.005	2.926	3.237	0	2.678	2.591	3.043	2.513	1.848	2.794	2.969	1.853	2.734	2.498	2.78	3.12	2.779	3.648	2.726
Ata_3SR_VP_9_9_2021_72_4B_1_05m_2_scaffold_10132_42_10	2.225	2.012	1.878	2.812	2.905	3.12	2.409	2.335	2.479	2.65	2.348	2.786	1.884	3.098	2.611	2.692	2.889	2.988	2.883	2.673	2.639	2.774	2.678	0	1.325	1.491	2.738	1.848	2.432	2.924	1.948	2.033	1.125	0.823	1.793	0.759	1.612	2.426
Atabeya_2_FINAL_2143_8817b	2.505	2.332	2.121	2.726	2.592	2.774	2.511	2.599	2.391	2.512	2.367	2.715	2.073	2.997	2.234	2.17	2.892	2.744	3.018	2.662	2.566	2.753	2.591	1.325	0	1.268	2.633	2.125	2.421	2.884	2.182	2.515	1.34	1.299	1.938	1.243	1.771	2.568
Atabeya_2_FINAL_2151_05530	2.698	2.579	2.349	3.141	2.954	3.23	2.822	3.281	3.055	2.905	2.6	3.004	2.377	3.582	2.458	2.773	3.159	3.036	3.206	3.208	2.738	2.81	3.043	1.491	1.268	0	3.207	2.226	2.812	3.181	2.347	2.414	1.515	1.247	1.961	1.245	2.466	2.819
GokArlX1_0deb9_1_unrelaxed_rank_004_alphafold2_ptm_model_2_seed_000	2.165	2.485	1.765	2.385	2.37	2.739	2.204	2.818	2.496	2.676	2.468	2.424	2.843	3.052	3.148	3.13	2.41	2.447	2.728	2.874	2.813	2.999	2.513	2.738	2.633	3.207	0	2.147	2.613	2.328	2.225	2.581	2.681	2.69	3.134	2.687	3.374	2.604
McaArl2_ba708_unrelaxed_rank_005_alphafold2_ptm_model_1_seed_000	1.734	1.163	0.67	1.931	2.244	2.362	1.949	2.342	1.506	1.936	1.763	2.053	2.569	2.614	2.968	3.317	2.279	2.155	2.129	2.51	2.54	2.84	1.848	1.848	2.125	2.226	2.147	0	2.03	2.677	0.846	1.638	1.925	1.928	2.709	1.934	2.236	2.054
NgrArl8_11b5b_unrelaxed_rank_005_alphafold2_ptm_model_1_seed_000	2.388	2.144	1.796	2.463	2.825	3.094	2.49	2.846	2.369	2.991	1.769	2.52	2.723	3.199	2.87	3.321	2.573	2.509	3.162	2.726	2.804	2.883	2.794	2.432	2.421	2.812	2.613	2.03	0	2.723	2.111	1.324	2.469	2.314	2.825	2.291	2.482	2.237
PygArfrp1b_8f886_unrelaxed_rank_005_alphafold2_ptm_model_1_seed_000	2.646	2.337	2.123	2.946	2.93	2.663	2.45	2.85	2.553	2.949	2.14	2.629	3.18	3.157	3.308	3.43	2.471	2.776	3.166	3.22	2.546	2.495	2.969	2.924	2.884	3.181	2.328	2.677	2.723	0	2.723	2.708	2.95	2.832	2.957	2.84	2.951	2.223
PygArl2_1480a_unrelaxed_rank_005_alphafold2_ptm_model_1_seed_000	1.796	1.228	0.824	1.994	2.311	2.36	2.037	2.676	1.519	1.976	1.484	2.127	2.6	2.609	3.127	3.161	2.324	2.201	2.107	2.586	2.51	2.918	1.853	1.948	2.182	2.347	2.225	0.846	2.111	2.723	0	1.711	1.977	2.051	2.68	2.059	2.31	2.092
PygArl8_7b5ad_unrelaxed_rank_004_alphafold2_ptm_model_1_seed_000	2.268	2.129	1.757	2.353	2.724	2.845	2.279	2.459	1.966	2.751	1.72	2.295	2.596	3.19	2.731	3.19	2.699	2.346	3.191	2.529	2.567	3.048	2.734	2.033	2.515	2.414	2.581	1.638	1.324	2.708	1.711	0	2.109	2.098	2.545	2.094	2.119	1.944
SRVP_Atabeyarchaeota_1_curatedFINAL_iMGExii_29	2.55	1.958	1.848	2.722	2.649	3.085	2.283	2.558	2.358	2.351	2.337	2.661	1.832	3.154	2.384	2.519	2.974	2.956	3.049	2.657	2.585	2.781	2.498	1.125	1.34	1.515	2.681	1.925	2.469	2.95	1.977	2.109	0	1.198	1.604	1.217	1.648	2.263
SRVP_Atabeyarchaeota_1_curatedFINAL_iMGExii_6	2.46	2.092	1.942	2.966	2.741	3.249	2.512	2.774	2.427	2.732	2.41	2.902	2.252	3.139	2.437	2.512	3.003	3.166	3.144	2.862	2.747	2.649	2.78	0.823	1.299	1.247	2.69	1.928	2.314	2.832	2.051	2.098	1.198	0	1.835	0.418	1.606	2.476
SRVP_Atabeyarchaeota_29_797b7	2.99	2.769	2.824	3.282	3.148	3.27	2.866	3.127	3.087	3.097	2.86	3.35	2.391	3.625	2.757	2.853	3.229	3.343	3.717	3.085	2.862	3.405	3.12	1.793	1.938	1.961	3.134	2.709	2.825	2.957	2.68	2.545	1.604	1.835	0	1.881	2.171	2.819
SRVP_Atabeyarchaeota_6_defd8	2.444	2.076	1.964	2.935	2.882	3.053	2.538	2.762	2.414	2.69	2.409	2.876	2.281	3.115	2.453	2.536	2.953	3.131	3.129	2.844	2.745	2.649	2.779	0.759	1.243	1.245	2.687	1.934	2.291	2.84	2.059	2.094	1.217	0.418	1.881	0	1.657	2.442
SRVP_Freyarchaeota_final_genomeNew_Freya_genome	2.677	3.213	3.161	4.344	2.893	2.872	2.446	3.849	3.043	2.955	3.743	2.622	2.373	4.593	3.34	3.395	3.166	2.844	2.804	3.208	2.953	3.117	3.648	1.612	1.771	2.466	3.374	2.236	2.482	2.951	2.31	2.119	1.648	1.606	2.171	1.657	0	2.33
SsaArlX_fddf2_unrelaxed_rank_005_alphafold2_ptm_model_1_seed_000	2.717	2.25	2.053	2.648	2.614	3.045	2.4	2.859	2.197	2.963	2.062	2.659	2.294	2.784	2.679	2.882	2.647	2.733	2.909	2.641	2.369	2.418	2.726	2.426	2.568	2.819	2.604	2.054	2.237	2.223	2.092	1.944	2.263	2.476	2.819	2.442	2.33	0

## Sheet: pairwise_TMscore
	1a2b	1ksg	1ksj	1nvv	1qbk	1qg2	1yzq	1z2c	4m9q	4uj4	4v0m	5uhv	6ces	6gog	6nzd	6ulg	6v6v	6zir	7kfz	7opq	7rll	7wqy	7y4a	Ata_3SR_VP_9_9_2021_72_4B_1_05m_2_scaffold_10132_42_10	Atabeya_2_FINAL_2143_8817b	Atabeya_2_FINAL_2151_05530	GokArlX1_0deb9_1_unrelaxed_rank_004_alphafold2_ptm_model_2_seed_000	McaArl2_ba708_unrelaxed_rank_005_alphafold2_ptm_model_1_seed_000	NgrArl8_11b5b_unrelaxed_rank_005_alphafold2_ptm_model_1_seed_000	PygArfrp1b_8f886_unrelaxed_rank_005_alphafold2_ptm_model_1_seed_000	PygArl2_1480a_unrelaxed_rank_005_alphafold2_ptm_model_1_seed_000	PygArl8_7b5ad_unrelaxed_rank_004_alphafold2_ptm_model_1_seed_000	SRVP_Atabeyarchaeota_1_curatedFINAL_iMGExii_29	SRVP_Atabeyarchaeota_1_curatedFINAL_iMGExii_6	SRVP_Atabeyarchaeota_29_797b7	SRVP_Atabeyarchaeota_6_defd8	SRVP_Freyarchaeota_final_genomeNew_Freya_genome	SsaArlX_fddf2_unrelaxed_rank_005_alphafold2_ptm_model_1_seed_000
1a2b	1	0.8058	0.7901	0.8652	0.8153	0.7655	0.903	0.9786	0.7954	0.8571	0.7875	0.9154	0.7362	0.8543	0.7134	0.7164	0.9447	0.8882	0.8583	0.8606	0.7146	0.6987	0.9841	0.7492	0.7492	0.7293	0.7693	0.8114	0.7694	0.7283	0.8063	0.7745	0.751	0.7533	0.6691	0.7549	0.7595	0.7666
1ksg	0.8058	1	0.9401	0.5914	0.469	0.666	0.8374	0.5384	0.6324	0.547	0.5155	0.8339	0.4966	0.5238	0.5297	0.4661	0.7799	0.8163	0.5043	0.5317	0.4727	0.4712	0.548	0.7754	0.7779	0.703	0.7399	0.8865	0.7997	0.7444	0.8826	0.8262	0.7868	0.7842	0.6975	0.7854	0.4939	0.8479
1ksj	0.7901	0.9401	1	0.6045	0.4744	0.6522	0.8343	0.5229	0.6357	0.5178	0.5607	0.8249	0.4943	0.5305	0.5354	0.481	0.755	0.8012	0.5168	0.5286	0.468	0.4659	0.5495	0.7684	0.7714	0.6972	0.6984	0.8659	0.7693	0.723	0.8598	0.8009	0.7708	0.7781	0.6825	0.7771	0.4929	0.8339
1nvv	0.8652	0.5914	0.6045	1	0.257	0.7098	0.9243	0.2626	0.3602	0.3267	0.3051	0.9816	0.2564	0.3354	0.2583	0.2923	0.8199	0.962	0.7788	0.444	0.3792	0.3789	0.3374	0.7419	0.7396	0.6758	0.6479	0.774	0.7069	0.662	0.769	0.739	0.7451	0.7451	0.6558	0.7478	0.4963	0.7572
1qbk	0.8153	0.469	0.4744	0.257	1	0.75	0.8999	0.2326	0.3306	0.2152	0.2439	0.8941	0.2626	0.2425	0.2173	0.231	0.7797	0.8695	0.2587	0.4239	0.5085	0.4587	0.2613	0.7478	0.7438	0.679	0.6362	0.7595	0.6938	0.6385	0.7552	0.7281	0.7569	0.7477	0.6759	0.7534	0.4564	0.7286
1qg2	0.7655	0.666	0.6522	0.7098	0.75	1	0.8189	0.6878	0.686	0.7135	0.658	0.8297	0.6291	0.7167	0.6256	0.6289	0.765	0.8228	0.6912	0.6945	0.6489	0.6488	0.7234	0.677	0.6931	0.6278	0.6418	0.7174	0.6518	0.665	0.7155	0.6724	0.6841	0.685	0.7036	0.6867	0.6048	0.7281
1yzq	0.903	0.8374	0.8343	0.9243	0.8999	0.8189	1	0.9059	0.8404	0.9186	0.8318	0.9186	0.7974	0.9098	0.7855	0.7886	0.8644	0.8796	0.9143	0.9372	0.7428	0.7261	0.9105	0.8071	0.7795	0.7716	0.8152	0.8455	0.8062	0.7657	0.8383	0.8122	0.8123	0.8087	0.7179	0.8046	0.8083	0.7791
1z2c	0.9786	0.5384	0.5229	0.2626	0.2326	0.6878	0.9059	1	0.3054	0.2225	0.2506	0.9144	0.2938	0.2347	0.323	0.3179	0.9371	0.8894	0.2294	0.4246	0.4166	0.4559	0.2269	0.7674	0.7525	0.7069	0.6629	0.8081	0.7365	0.7175	0.8025	0.7536	0.7674	0.7634	0.6803	0.7647	0.5855	0.7617
4m9q	0.7954	0.6324	0.6357	0.3602	0.3306	0.686	0.8404	0.3054	1	0.3632	0.3146	0.832	0.3762	0.2908	0.2503	0.2995	0.7641	0.8235	0.3506	0.4219	0.4961	0.5013	0.3165	0.7717	0.7648	0.7101	0.764	0.8676	0.7966	0.7531	0.8665	0.8068	0.7747	0.7777	0.6962	0.7783	0.5133	0.8347
4uj4	0.8571	0.547	0.5178	0.3267	0.2152	0.7135	0.9186	0.2225	0.3632	1	0.2584	0.9161	0.2208	0.1877	0.1828	0.2002	0.823	0.9163	0.2706	0.4795	0.4209	0.39	0.2245	0.7643	0.7609	0.693	0.6661	0.7923	0.7144	0.6705	0.7894	0.7304	0.7784	0.7647	0.6891	0.7656	0.4692	0.7457
4v0m	0.7875	0.5155	0.5607	0.3051	0.2439	0.658	0.8318	0.2506	0.3146	0.2584	1	0.8185	0.2081	0.2528	0.2015	0.177	0.7704	0.7995	0.3017	0.4447	0.456	0.422	0.2267	0.7612	0.7642	0.6861	0.7305	0.8556	0.7862	0.7637	0.8506	0.8189	0.7657	0.7675	0.6898	0.767	0.4986	0.8628
5uhv	0.9154	0.8339	0.8249	0.9816	0.8941	0.8297	0.9186	0.9144	0.832	0.9161	0.8185	1	0.7694	0.9742	0.752	0.7561	0.8719	0.9529	0.9678	0.9602	0.7463	0.7282	0.9377	0.801	0.7744	0.7653	0.807	0.8391	0.8023	0.7601	0.8328	0.8089	0.8051	0.7965	0.7083	0.798	0.7924	0.7551
6ces	0.7362	0.4966	0.4943	0.2564	0.2626	0.6291	0.7974	0.2938	0.3762	0.2208	0.2081	0.7694	1	0.2644	0.2489	0.2434	0.7057	0.7444	0.2851	0.4361	0.3834	0.417	0.2582	0.8504	0.8563	0.7614	0.6634	0.7609	0.7175	0.6809	0.7602	0.7534	0.8589	0.8587	0.7631	0.8552	0.5263	0.8022
6gog	0.8543	0.5238	0.5305	0.3354	0.2425	0.7167	0.9098	0.2347	0.2908	0.1877	0.2528	0.9742	0.2644	1	0.2644	0.2821	0.8102	0.9764	0.3091	0.405	0.3947	0.4106	0.2516	0.735	0.7295	0.6725	0.6768	0.769	0.7068	0.6947	0.766	0.7437	0.7412	0.7387	0.6622	0.7414	0.5067	0.7398
6nzd	0.7134	0.5297	0.5354	0.2583	0.2173	0.6256	0.7855	0.323	0.2503	0.1828	0.2015	0.752	0.2489	0.2644	1	0.6224	0.679	0.7591	0.2433	0.3382	0.3809	0.4031	0.2986	0.8038	0.811	0.7378	0.6268	0.7306	0.7009	0.6317	0.7282	0.7402	0.8074	0.8082	0.7281	0.8087	0.5125	0.7583
6ulg	0.7164	0.4661	0.481	0.2923	0.231	0.6289	0.7886	0.3179	0.2995	0.2002	0.177	0.7561	0.2434	0.2821	0.6224	1	0.6836	0.7601	0.2383	0.3379	0.3815	0.4059	0.3104	0.8105	0.8142	0.7466	0.6264	0.7317	0.702	0.6306	0.7296	0.7333	0.8144	0.813	0.734	0.8126	0.5041	0.7566
6v6v	0.9447	0.7799	0.755	0.8199	0.7797	0.765	0.8644	0.9371	0.7641	0.823	0.7704	0.8719	0.7057	0.8102	0.679	0.6836	1	0.8565	0.8165	0.8185	0.7098	0.6891	0.9364	0.714	0.7253	0.697	0.7538	0.7813	0.7495	0.7219	0.7773	0.7432	0.7179	0.7191	0.6566	0.7238	0.7164	0.7526
6zir	0.8882	0.8163	0.8012	0.962	0.8695	0.8228	0.8796	0.8894	0.8235	0.9163	0.7995	0.9529	0.7444	0.9764	0.7591	0.7601	0.8565	1	0.9636	0.9349	0.7416	0.725	0.9078	0.7704	0.7457	0.7396	0.7983	0.8283	0.7975	0.742	0.8228	0.7935	0.7758	0.7677	0.6935	0.7717	0.765	0.7345
7kfz	0.8583	0.5043	0.5168	0.7788	0.2587	0.6912	0.9143	0.2294	0.3506	0.2706	0.3017	0.9678	0.2851	0.3091	0.2433	0.2383	0.8165	0.9636	1	0.4651	0.3901	0.3856	0.2665	0.7328	0.7316	0.6595	0.6881	0.7717	0.7255	0.6653	0.77	0.7509	0.7376	0.7384	0.6617	0.7401	0.4568	0.7434
7opq	0.8606	0.5317	0.5286	0.444	0.4239	0.6945	0.9372	0.4246	0.4219	0.4795	0.4447	0.9602	0.4361	0.405	0.3382	0.3379	0.8185	0.9349	0.4651	1	0.3905	0.3864	0.4593	0.7689	0.7509	0.7026	0.7038	0.7955	0.7288	0.6908	0.7903	0.7398	0.7663	0.7692	0.6728	0.7706	0.5161	0.7578
7rll	0.7146	0.4727	0.468	0.3792	0.5085	0.6489	0.7428	0.4166	0.4961	0.4209	0.456	0.7463	0.3834	0.3947	0.3809	0.3815	0.7098	0.7416	0.3901	0.3905	1	0.6167	0.3898	0.7129	0.7237	0.6709	0.6743	0.7711	0.7662	0.7265	0.773	0.7752	0.7238	0.7252	0.716	0.7257	0.444	0.8164
7wqy	0.6987	0.4712	0.4659	0.3789	0.4587	0.6488	0.7261	0.4559	0.5013	0.39	0.422	0.7282	0.417	0.4106	0.4031	0.4059	0.6891	0.725	0.3856	0.3864	0.6167	1	0.3924	0.707	0.7199	0.6554	0.643	0.7703	0.7517	0.7078	0.7691	0.7631	0.7165	0.7179	0.7035	0.7173	0.4402	0.8066
7y4a	0.9841	0.548	0.5495	0.3374	0.2613	0.7234	0.9105	0.2269	0.3165	0.2245	0.2267	0.9377	0.2582	0.2516	0.2986	0.3104	0.9364	0.9078	0.2665	0.4593	0.3898	0.3924	1	0.7449	0.7444	0.6891	0.6587	0.7837	0.7223	0.6775	0.7831	0.754	0.7529	0.7508	0.6591	0.7512	0.4859	0.7688
Ata_3SR_VP_9_9_2021_72_4B_1_05m_2_scaffold_10132_42_10	0.7492	0.7754	0.7684	0.7419	0.7478	0.677	0.8071	0.7674	0.7717	0.7643	0.7612	0.801	0.8504	0.735	0.8038	0.8105	0.714	0.7704	0.7328	0.7689	0.7129	0.707	0.7449	1	0.9373	0.9366	0.7639	0.8118	0.7859	0.7178	0.8041	0.7802	0.96	0.9768	0.8573	0.9799	0.8774	0.7801
Atabeya_2_FINAL_2143_8817b	0.7492	0.7779	0.7714	0.7396	0.7438	0.6931	0.7795	0.7525	0.7648	0.7609	0.7642	0.7744	0.8563	0.7295	0.811	0.8142	0.7253	0.7457	0.7316	0.7509	0.7237	0.7199	0.7444	0.9373	1	0.9428	0.7651	0.792	0.7644	0.7295	0.788	0.7787	0.9299	0.9274	0.841	0.9321	0.8512	0.7607
Atabeya_2_FINAL_2151_05530	0.7293	0.703	0.6972	0.6758	0.679	0.6278	0.7716	0.7069	0.7101	0.693	0.6861	0.7653	0.7614	0.6725	0.7378	0.7466	0.697	0.7396	0.6595	0.7026	0.6709	0.6554	0.6891	0.9366	0.9428	1	0.7044	0.7638	0.7157	0.6562	0.7548	0.7356	0.924	0.9439	0.8546	0.9442	0.8151	0.7554
GokArlX1_0deb9_1_unrelaxed_rank_004_alphafold2_ptm_model_2_seed_000	0.7693	0.7399	0.6984	0.6479	0.6362	0.6418	0.8152	0.6629	0.764	0.6661	0.7305	0.807	0.6634	0.6768	0.6268	0.6264	0.7538	0.7983	0.6881	0.7038	0.6743	0.643	0.6587	0.7639	0.7651	0.7044	1	0.8215	0.7681	0.7987	0.8262	0.7736	0.778	0.7766	0.7156	0.7759	0.6709	0.8477
McaArl2_ba708_unrelaxed_rank_005_alphafold2_ptm_model_1_seed_000	0.8114	0.8865	0.8659	0.774	0.7595	0.7174	0.8455	0.8081	0.8676	0.7923	0.8556	0.8391	0.7609	0.769	0.7306	0.7317	0.7813	0.8283	0.7717	0.7955	0.7711	0.7703	0.7837	0.8118	0.792	0.7638	0.8215	1	0.851	0.7965	0.9813	0.8403	0.8101	0.815	0.7225	0.8147	0.7893	0.8473
NgrArl8_11b5b_unrelaxed_rank_005_alphafold2_ptm_model_1_seed_000	0.7694	0.7997	0.7693	0.7069	0.6938	0.6518	0.8062	0.7365	0.7966	0.7144	0.7862	0.8023	0.7175	0.7068	0.7009	0.702	0.7495	0.7975	0.7255	0.7288	0.7662	0.7517	0.7223	0.7859	0.7644	0.7157	0.7681	0.851	1	0.7426	0.8462	0.9459	0.7787	0.791	0.7065	0.7924	0.7508	0.8684
PygArfrp1b_8f886_unrelaxed_rank_005_alphafold2_ptm_model_1_seed_000	0.7283	0.7444	0.723	0.662	0.6385	0.665	0.7657	0.7175	0.7531	0.6705	0.7637	0.7601	0.6809	0.6947	0.6317	0.6306	0.7219	0.742	0.6653	0.6908	0.7265	0.7078	0.6775	0.7178	0.7295	0.6562	0.7987	0.7965	0.7426	1	0.7993	0.7603	0.7292	0.7302	0.721	0.729	0.6822	0.8677
PygArl2_1480a_unrelaxed_rank_005_alphafold2_ptm_model_1_seed_000	0.8063	0.8826	0.8598	0.769	0.7552	0.7155	0.8383	0.8025	0.8665	0.7894	0.8506	0.8328	0.7602	0.766	0.7282	0.7296	0.7773	0.8228	0.77	0.7903	0.773	0.7691	0.7831	0.8041	0.788	0.7548	0.8262	0.9813	0.8462	0.7993	1	0.8361	0.8062	0.8066	0.7166	0.806	0.7824	0.8461
PygArl8_7b5ad_unrelaxed_rank_004_alphafold2_ptm_model_1_seed_000	0.7745	0.8262	0.8009	0.739	0.7281	0.6724	0.8122	0.7536	0.8068	0.7304	0.8189	0.8089	0.7534	0.7437	0.7402	0.7333	0.7432	0.7935	0.7509	0.7398	0.7752	0.7631	0.754	0.7802	0.7787	0.7356	0.7736	0.8403	0.9459	0.7603	0.8361	1	0.7765	0.7876	0.6984	0.7885	0.7705	0.8689
SRVP_Atabeyarchaeota_1_curatedFINAL_iMGExii_29	0.751	0.7868	0.7708	0.7451	0.7569	0.6841	0.8123	0.7674	0.7747	0.7784	0.7657	0.8051	0.8589	0.7412	0.8074	0.8144	0.7179	0.7758	0.7376	0.7663	0.7238	0.7165	0.7529	0.96	0.9299	0.924	0.778	0.8101	0.7787	0.7292	0.8062	0.7765	1	0.9614	0.8785	0.9597	0.8652	0.7862
SRVP_Atabeyarchaeota_1_curatedFINAL_iMGExii_6	0.7533	0.7842	0.7781	0.7451	0.7477	0.685	0.8087	0.7634	0.7777	0.7647	0.7675	0.7965	0.8587	0.7387	0.8082	0.813	0.7191	0.7677	0.7384	0.7692	0.7252	0.7179	0.7508	0.9768	0.9274	0.9439	0.7766	0.815	0.791	0.7302	0.8066	0.7876	0.9614	1	0.8565	0.9937	0.8727	0.7838
SRVP_Atabeyarchaeota_29_797b7	0.6691	0.6975	0.6825	0.6558	0.6759	0.7036	0.7179	0.6803	0.6962	0.6891	0.6898	0.7083	0.7631	0.6622	0.7281	0.734	0.6566	0.6935	0.6617	0.6728	0.716	0.7035	0.6591	0.8573	0.841	0.8546	0.7156	0.7225	0.7065	0.721	0.7166	0.6984	0.8785	0.8565	1	0.854	0.7687	0.7502
SRVP_Atabeyarchaeota_6_defd8	0.7549	0.7854	0.7771	0.7478	0.7534	0.6867	0.8046	0.7647	0.7783	0.7656	0.767	0.798	0.8552	0.7414	0.8087	0.8126	0.7238	0.7717	0.7401	0.7706	0.7257	0.7173	0.7512	0.9799	0.9321	0.9442	0.7759	0.8147	0.7924	0.729	0.806	0.7885	0.9597	0.9937	0.854	1	0.8717	0.7832
SRVP_Freyarchaeota_final_genomeNew_Freya_genome	0.7595	0.4939	0.4929	0.4963	0.4564	0.6048	0.8083	0.5855	0.5133	0.4692	0.4986	0.7924	0.5263	0.5067	0.5125	0.5041	0.7164	0.765	0.4568	0.5161	0.444	0.4402	0.4859	0.8774	0.8512	0.8151	0.6709	0.7893	0.7508	0.6822	0.7824	0.7705	0.8652	0.8727	0.7687	0.8717	1	0.8094
SsaArlX_fddf2_unrelaxed_rank_005_alphafold2_ptm_model_1_seed_000	0.7666	0.8479	0.8339	0.7572	0.7286	0.7281	0.7791	0.7617	0.8347	0.7457	0.8628	0.7551	0.8022	0.7398	0.7583	0.7566	0.7526	0.7345	0.7434	0.7578	0.8164	0.8066	0.7688	0.7801	0.7607	0.7554	0.8477	0.8473	0.8684	0.8677	0.8461	0.8689	0.7862	0.7838	0.7502	0.7832	0.8094	1
