# Supplementary material for: Complete genomes of Asgard archaea reveal diverse integrated and mobile genetic elements
Source: HighWire-hosted journal article supplement (doi:10.1101/gr.279480.124), 2024-10-01
Supplement: Supplemental_Tables_S2-S11.xlsx [file Supplemental_Tables_S2-S11.xlsx]

## Sheet: Supplemental Table 2
Supplemental Table S2 Metatranscriptomic hits based on circular genomes (colored genes are expressed methylases)
proteins_id	prodigal_headers	prodigal_headers_short	sample	rna_hit	start_position	end_position	gene_length	total_metatranscriptome_reads	RPKM_corrected	arcogs	arcogs_geneID	arcogs_Description	arcogs_Pathway	COG	COG_Description	COG_PathwayID	COG_Pathway
SRVP_Atabeya-1-FCNFGDKI_05880	SRVP_Atabeya-1_588 # 551576 # 554563 # 1 # ID=1_588;partial=00;start_type=ATG;rbs_motif=GGAG/GAGG;rbs_spacer=5-10bp;gc_cont=0.441	SRVP_Atabeya-1_588	SR-VP_11_27_2022_S1_40cm_MT	1	551576	554563	2988	1473124	0.227185	arCOG02635	-	Type_II_restriction_enzyme,_methylase_subunit	V	COG0286	Type_I_restriction-modification_system,_DNA_methylase_subunit	V	-
SRVP_Atabeya-1-FCNFGDKI_19770	SRVP_Atabeya-1_1977 # 2008269 # 2010938 # 1 # ID=1_1977;partial=00;start_type=GTG;rbs_motif=GGAG/GAGG;rbs_spacer=5-10bp;gc_cont=0.506	SRVP_Atabeya-1_1977	SR-VP_11_27_2022_S1_100cm_MT	3	2008269	2010938	2670	11625022	0.0966532	arCOG00880	HsdR	Type_I_site-specific_restriction-modification_system,_R_(restriction)_subunit_or_related_helicase	V	COG4096	Type_I_site-specific_restriction_endonuclease,_part_of_a_restriction-modification_system	V	-
SRVP_Atabeya-1-FCNFGDKI_21100	SRVP_Atabeya-1_2110 # 2141433 # 2141951 # 1 # ID=1_2110;partial=00;start_type=ATG;rbs_motif=AGGAG;rbs_spacer=5-10bp;gc_cont=0.497	SRVP_Atabeya-1_2110	SR-VP_11_27_2022_S1_100cm_MT	6	2141433	2141951	519	11625022	0.994466	arCOG05194	-	Predicted_restriction_endonuclease,_Mrr-cat_superfamily	V	COG4127	Predicted_restriction_endonuclease,_Mrr-cat_superfamily	R	-
SRVP_Atabeya-1-FCNFGDKI_25710	SRVP_Atabeya-1_2572 # 2598043 # 2601093 # 1 # ID=1_2572;partial=00;start_type=ATG;rbs_motif=GGxGG;rbs_spacer=5-10bp;gc_cont=0.408	SRVP_Atabeya-1_2572	SR-VP_11_27_2022_S1_100cm_MT	16	2598043	2601093	3051	11625022	0.451112	arCOG02635	-	Type_II_restriction_enzyme,_methylase_subunit	V	COG1002	Type_II_restriction/modification_system,_endonuclease_and_methylase_domains	V	-
SRVP_Atabeya-2-AMLJHBDE_11310	SRVP_Atabeya-2_1131 # 1089673 # 1092657 # -1 # ID=1_1131;partial=00;start_type=ATG;rbs_motif=AGxAGG/AGGxGG;rbs_spacer=5-10bp;gc_cont=0.425	SRVP_Atabeya-2_1131	SR-VP_11_27_2022_S1_100cm_MT	2	1089673	1092657	2985	11625022	0.0576357	arCOG02635	-	Type_II_restriction_enzyme,_methylase_subunit	V	COG0286	Type_I_restriction-modification_system,_DNA_methylase_subunit	V	-
SRVP_Atabeya-2-AMLJHBDE_11310	SRVP_Atabeya-2_1131 # 1089673 # 1092657 # -1 # ID=1_1131;partial=00;start_type=ATG;rbs_motif=AGxAGG/AGGxGG;rbs_spacer=5-10bp;gc_cont=0.425	SRVP_Atabeya-2_1131	SR-VP_07_25_2022_A1_70cm_MT	1	1089673	1092657	2985	125142	2.67703	arCOG02635	-	Type_II_restriction_enzyme,_methylase_subunit	V	COG0286	Type_I_restriction-modification_system,_DNA_methylase_subunit	V	-
SRVP_Atabeya-2-AMLJHBDE_16670	SRVP_Atabeya-2_1667 # 1663466 # 1664386 # 1 # ID=1_1667;partial=00;start_type=GTG;rbs_motif=AGGAG/GGAGG;rbs_spacer=11-12bp;gc_cont=0.455	SRVP_Atabeya-2_1667	SR-VP_11_27_2022_S1_100cm_MT	3	1663466	1664386	921	11625022	0.2802	arCOG00115	-	DNA_modification_methylase	L	COG0863	DNA_modification_methylase	L	-
SRVP_Atabeya-2-AMLJHBDE_20630	SRVP_Atabeya-2_2063 # 2027150 # 2028436 # -1 # ID=1_2063;partial=00;start_type=ATG;rbs_motif=None;rbs_spacer=None;gc_cont=0.434	SRVP_Atabeya-2_2063	SR-VP_11_27_2022_S1_100cm_MT	3	2027150	2028436	1287	11625022	0.200516	arCOG05102	McrC	McrBC_5-methylcytosine_restriction_system_component	V	COG4268	5-methylcytosine-specific_restriction_endonuclease_McrBC,_regulatory_subunit_McrC	V	-
SRVP_Atabeya-2-AMLJHBDE_20650	SRVP_Atabeya-2_2065 # 2030738 # 2031343 # -1 # ID=1_2065;partial=00;start_type=GTG;rbs_motif=GGAGG;rbs_spacer=5-10bp;gc_cont=0.477	SRVP_Atabeya-2_2065	SR-VP_11_27_2022_S1_100cm_MT	1	2030738	2031343	606	11625022	0.141949	arCOG02626	HsdS	Restriction_endonuclease_S_subunit	V	COG0732	Restriction_endonuclease_S_subunit	V	-
SRVP_Atabeya-2-AMLJHBDE_20660	SRVP_Atabeya-2_2066 # 2031872 # 2034739 # 1 # ID=1_2066;partial=00;start_type=TTG;rbs_motif=GGxGG;rbs_spacer=5-10bp;gc_cont=0.461	SRVP_Atabeya-2_2066	SR-VP_11_27_2022_S1_100cm_MT	5	2031872	2034739	2868	11625022	0.149967	arCOG00880	HsdR	Type_I_site-specific_restriction-modification_system,_R_(restriction)_subunit_or_related_helicase	V	COG4096	Type_I_site-specific_restriction_endonuclease,_part_of_a_restriction-modification_system	V	-
SRVP_Atabeya-2-AMLJHBDE_20670	SRVP_Atabeya-2_2067 # 2034726 # 2036210 # 1 # ID=1_2067;partial=00;start_type=ATG;rbs_motif=GGAG/GAGG;rbs_spacer=5-10bp;gc_cont=0.448	SRVP_Atabeya-2_2067	SR-VP_11_27_2022_S1_100cm_MT	2	2034726	2036210	1485	11625022	0.115854	arCOG02632	HsdM	Type_I_restriction-modification_system_methyltransferase_subunit	V	COG0286	Type_I_restriction-modification_system,_DNA_methylase_subunit	V	-
SRVP_Atabeya-2-AMLJHBDE_20680	SRVP_Atabeya-2_2068 # 2036207 # 2037403 # 1 # ID=1_2068;partial=00;start_type=ATG;rbs_motif=GGA/GAG/AGG;rbs_spacer=5-10bp;gc_cont=0.455	SRVP_Atabeya-2_2068	SR-VP_11_27_2022_S1_100cm_MT	3	2036207	2037403	1197	11625022	0.215592	arCOG02626	HsdS	Restriction_endonuclease_S_subunit	V	COG0732	Restriction_endonuclease_S_subunit	V	-
SRVP_Freya-GDANCFEG_04210	SRVP-Freya_425 # 468643 # 470733 # -1 # ID=1_425;partial=00;start_type=ATG;rbs_motif=None;rbs_spacer=None;gc_cont=0.392	SRVP-Freya_425	SR-VP_11_27_2022_S2_40cm_MT	3	468643	470733	2091	4025082	0.356445	arCOG02636	-	Adenine-specific_DNA_methylase	L	COG0286	Type_I_restriction-modification_system,_DNA_methylase_subunit	V	-
SRVP_Freya-GDANCFEG_04210	SRVP-Freya_425 # 468643 # 470733 # -1 # ID=1_425;partial=00;start_type=ATG;rbs_motif=None;rbs_spacer=None;gc_cont=0.392	SRVP-Freya_425	SR-VP_11_27_2022_S1_80cm_MT	1	468643	470733	2091	4000856	0.119534	arCOG02636	-	Adenine-specific_DNA_methylase	L	COG0286	Type_I_restriction-modification_system,_DNA_methylase_subunit	V	-
SRVP_Freya-GDANCFEG_08260	SRVP-Freya_830 # 902594 # 902941 # -1 # ID=1_830;partial=00;start_type=ATG;rbs_motif=AGGAGG;rbs_spacer=11-12bp;gc_cont=0.460	SRVP-Freya_830	SR-VP_11_27_2022_S1_40cm_MT	1	902594	902941	348	1473124	1.95066	arCOG03898	McrA	Restriction_endonuclease,_McrA/HNH_family	V	COG1403	5-methylcytosine-specific_restriction_endonuclease_McrA	V	-
SRVP_Freya-GDANCFEG_08750	SRVP-Freya_879 # 954869 # 956407 # 1 # ID=1_879;partial=00;start_type=ATG;rbs_motif=GGAG/GAGG;rbs_spacer=5-10bp;gc_cont=0.401	SRVP-Freya_879	SR-VP_07_25_2022_A1_70cm_MT	1	954869	956407	1539	125142	5.19228	arCOG04356	Bax1	Nuclease_of_restriction_endonuclease-like_fold,_implicated_in_nucleotide_excision_repair	L	COG3372	Predicted_nuclease_of_restriction_endonuclease-like_(RecB)_superfamily,_implicated_in_nucleotide_excision_repair	R	-
SRVP_Atabeya-1-FCNFGDKI_00070	SRVP_Atabeya-1_7 # 4963 # 5163 # 1 # ID=1_7;partial=00;start_type=TTG;rbs_motif=GGAGG;rbs_spacer=5-10bp;gc_cont=0.433	SRVP_Atabeya-1_7	SR-VP_11_27_2022_S1_100cm_MT	1	4963	5163	201	11625022	0.427967	-	-	-	-	-	-	-	-
SRVP_Atabeya-1-FCNFGDKI_00080	SRVP_Atabeya-1_8 # 5136 # 5666 # 1 # ID=1_8;partial=00;start_type=TTG;rbs_motif=GGA/GAG/AGG;rbs_spacer=5-10bp;gc_cont=0.499	SRVP_Atabeya-1_8	SR-VP_11_27_2022_S1_100cm_MT	2	5136	5666	531	11625022	0.323998	-	-	-	-	-	-	-	-
SRVP_Atabeya-1-FCNFGDKI_00090	SRVP_Atabeya-1_9 # 5683 # 6468 # -1 # ID=1_9;partial=00;start_type=ATG;rbs_motif=AGGAG/GGAGG;rbs_spacer=11-12bp;gc_cont=0.482	SRVP_Atabeya-1_9	SR-VP_07_25_2022_A4_70cm_MT	1	5683	6468	786	19546	65.0908	arCOG01899	IolE	Sugar_phosphate_isomerase/epimerase	G	COG1082	Sugar_phosphate_isomerase/epimerase	G	-
SRVP_Atabeya-1-FCNFGDKI_00090	SRVP_Atabeya-1_9 # 5683 # 6468 # -1 # ID=1_9;partial=00;start_type=ATG;rbs_motif=AGGAG/GGAGG;rbs_spacer=11-12bp;gc_cont=0.482	SRVP_Atabeya-1_9	SR-VP_11_27_2022_S1_100cm_MT	1	5683	6468	786	11625022	0.109442	arCOG01899	IolE	Sugar_phosphate_isomerase/epimerase	G	COG1082	Sugar_phosphate_isomerase/epimerase	G	-
SRVP_Atabeya-1-FCNFGDKI_00170	SRVP_Atabeya-1_17 # 13728 # 14735 # -1 # ID=1_17;partial=00;start_type=TTG;rbs_motif=GGxGG;rbs_spacer=11-12bp;gc_cont=0.461	SRVP_Atabeya-1_17	SR-VP_11_27_2022_S1_100cm_MT	1	13728	14735	1008	11625022	0.0853386	arCOG01114	PpsA	Phosphoenolpyruvate_synthase/pyruvate_phosphate_dikinase	G	COG0574	Phosphoenolpyruvate_synthase/pyruvate_phosphate_dikinase	G	Gluconeogenesis
SRVP_Atabeya-1-FCNFGDKI_00310	SRVP_Atabeya-1_31 # 25010 # 26404 # -1 # ID=1_31;partial=00;start_type=ATG;rbs_motif=None;rbs_spacer=None;gc_cont=0.511	SRVP_Atabeya-1_31	SR-VP_11_27_2022_S1_100cm_MT	1	25010	26404	1395	11625022	0.061664	arCOG02231	-	Uncharacterized_FAD-dependent_dehydrogenase	R	COG2509	FAD-dependent_dehydrogenase	R	-
SRVP_Atabeya-1-FCNFGDKI_00320	SRVP_Atabeya-1_32 # 26610 # 27050 # 1 # ID=1_32;partial=00;start_type=ATG;rbs_motif=GGAG/GAGG;rbs_spacer=5-10bp;gc_cont=0.506	SRVP_Atabeya-1_32	SR-VP_11_27_2022_S1_100cm_MT	3	26610	27050	441	11625022	0.585179	arCOG02464	PurE	Phosphoribosylcarboxyaminoimidazole_(NCAIR)_mutase	F	COG0041	Phosphoribosylcarboxyaminoimidazole_(NCAIR)_mutase	F	Purine_biosynthesis
SRVP_Atabeya-1-FCNFGDKI_00340	SRVP_Atabeya-1_34 # 28347 # 29276 # -1 # ID=1_34;partial=00;start_type=ATG;rbs_motif=3Base/5BMM;rbs_spacer=13-15bp;gc_cont=0.496	SRVP_Atabeya-1_34	SR-VP_11_27_2022_S1_100cm_MT	2	28347	29276	930	11625022	0.184992	arCOG00014	RbsK	Sugar_kinase,_ribokinase_family	G	COG0524	Sugar_or_nucleoside_kinase,_ribokinase_family	G	Glycolysis
SRVP_Atabeya-1-FCNFGDKI_00420	SRVP_Atabeya-1_42 # 37302 # 39362 # -1 # ID=1_42;partial=00;start_type=ATG;rbs_motif=GGA/GAG/AGG;rbs_spacer=5-10bp;gc_cont=0.516	SRVP_Atabeya-1_42	SR-VP_11_27_2022_S1_100cm_MT	63	37302	39362	2061	11625022	2.62947	-	-	-	-	COG4412	Bacillopeptidase_F,_M6_metalloprotease_family	O	-
SRVP_Atabeya-1-FCNFGDKI_00450	SRVP_Atabeya-1_45 # 40904 # 41479 # -1 # ID=1_45;partial=00;start_type=ATG;rbs_motif=GGA/GAG/AGG;rbs_spacer=5-10bp;gc_cont=0.495	SRVP_Atabeya-1_45	SR-VP_11_27_2022_S1_100cm_MT	1	40904	41479	576	11625022	0.149343	-	-	-	-	COG1418	HD_superfamily_phosphodieaserase,_includes_HD_domain_of_RNase_Y	JR	-
SRVP_Atabeya-1-FCNFGDKI_00490	SRVP_Atabeya-1_49 # 43480 # 45810 # 1 # ID=1_49;partial=00;start_type=TTG;rbs_motif=GGAG/GAGG;rbs_spacer=5-10bp;gc_cont=0.517	SRVP_Atabeya-1_49	SR-VP_11_27_2022_S1_100cm_MT	5	43480	45810	2331	11625022	0.184516	arCOG04949	OVP1	Na+_or_H+-translocating_membrane_pyrophosphatase	C	COG3808	Na+_or_H+-translocating_membrane_pyrophosphatase	C	-
SRVP_Atabeya-1-FCNFGDKI_00510	SRVP_Atabeya-1_51 # 46208 # 48667 # -1 # ID=1_51;partial=00;start_type=ATG;rbs_motif=GGA/GAG/AGG;rbs_spacer=5-10bp;gc_cont=0.497	SRVP_Atabeya-1_51	SR-VP_11_27_2022_S1_100cm_MT	2	46208	48667	2460	11625022	0.0699361	-	-	-	-	-	-	-	-
SRVP_Atabeya-1-FCNFGDKI_00540	SRVP_Atabeya-1_54 # 50923 # 52008 # -1 # ID=1_54;partial=00;start_type=TTG;rbs_motif=AGGAG;rbs_spacer=5-10bp;gc_cont=0.489	SRVP_Atabeya-1_54	SR-VP_11_27_2022_S1_100cm_MT	3	50923	52008	1086	11625022	0.237628	-	-	-	-	-	-	-	-
SRVP_Atabeya-1-FCNFGDKI_00620	SRVP_Atabeya-1_62 # 58480 # 61047 # 1 # ID=1_62;partial=00;start_type=ATG;rbs_motif=None;rbs_spacer=None;gc_cont=0.491	SRVP_Atabeya-1_62	SR-VP_11_27_2022_S1_100cm_MT	27	58480	61047	2568	11625022	0.90443	-	-	-	-	-	-	-	-
SRVP_Atabeya-1-FCNFGDKI_00730	SRVP_Atabeya-1_73 # 70104 # 70496 # 1 # ID=1_73;partial=00;start_type=TTG;rbs_motif=AGGAG;rbs_spacer=5-10bp;gc_cont=0.476	SRVP_Atabeya-1_73	SR-VP_11_27_2022_S1_100cm_MT	2	70104	70496	393	11625022	0.437768	arCOG03770	-	Zn_finger_protein	S	-	-	-	-
SRVP_Atabeya-1-FCNFGDKI_00820	SRVP_Atabeya-1_82 # 77632 # 79434 # 1 # ID=1_82;partial=00;start_type=ATG;rbs_motif=AGGA/GGAG/GAGG;rbs_spacer=11-12bp;gc_cont=0.483	SRVP_Atabeya-1_82	SR-VP_11_27_2022_S1_100cm_MT	10	77632	79434	1803	11625022	0.477101	-	-	-	-	COG1361	S-layer_protein_MJ0795,_predicted_component_of_type_IV_pili-like_system	R	-
SRVP_Atabeya-1-FCNFGDKI_00830	SRVP_Atabeya-1_83 # 79510 # 80547 # 1 # ID=1_83;partial=00;start_type=ATG;rbs_motif=AGGAG/GGAGG;rbs_spacer=11-12bp;gc_cont=0.490	SRVP_Atabeya-1_83	SR-VP_11_27_2022_S1_100cm_MT	2	79510	80547	1038	11625022	0.165744	-	-	-	-	COG1649	Uncharacterized_lipoprotein_YddW,_UPF0748_family	S	-
SRVP_Atabeya-1-FCNFGDKI_00860	SRVP_Atabeya-1_86 # 81847 # 84090 # 1 # ID=1_86;partial=00;start_type=ATG;rbs_motif=GGAG/GAGG;rbs_spacer=5-10bp;gc_cont=0.488	SRVP_Atabeya-1_86	SR-VP_11_27_2022_S1_100cm_MT	1	81847	84090	2244	11625022	0.0383339	-	-	-	-	-	-	-	-
SRVP_Atabeya-1-FCNFGDKI_00870	SRVP_Atabeya-1_87 # 84144 # 85322 # 1 # ID=1_87;partial=00;start_type=ATG;rbs_motif=GGxGG;rbs_spacer=11-12bp;gc_cont=0.503	SRVP_Atabeya-1_87	SR-VP_11_27_2022_S1_100cm_MT	1	84144	85322	1179	11625022	0.0729613	arCOG00070	GlyA	Glycine/serine_hydroxymethyltransferase	E	COG0112	Glycine/serine_hydroxymethyltransferase	E	Serine_biosynthesis
SRVP_Atabeya-1-FCNFGDKI_00970	SRVP_Atabeya-1_97 # 92464 # 93081 # -1 # ID=1_97;partial=00;start_type=TTG;rbs_motif=GGAG/GAGG;rbs_spacer=5-10bp;gc_cont=0.534	SRVP_Atabeya-1_97	SR-VP_11_27_2022_S1_100cm_MT	1	92464	93081	618	11625022	0.139193	arCOG07571	-	Uncharacterized_membrane_protein	S	-	-	-	-
SRVP_Atabeya-1-FCNFGDKI_01030	SRVP_Atabeya-1_103 # 96852 # 97199 # 1 # ID=1_103;partial=00;start_type=ATG;rbs_motif=None;rbs_spacer=None;gc_cont=0.486	SRVP_Atabeya-1_103	SR-VP_11_27_2022_S1_100cm_MT	5	96852	97199	348	11625022	1.23594	-	-	-	-	-	-	-	-
SRVP_Atabeya-1-FCNFGDKI_01040	SRVP_Atabeya-1_104 # 97142 # 98491 # -1 # ID=1_104;partial=00;start_type=GTG;rbs_motif=GGA/GAG/AGG;rbs_spacer=5-10bp;gc_cont=0.472	SRVP_Atabeya-1_104	SR-VP_11_27_2022_S1_100cm_MT	30	97142	98491	1350	11625022	1.91159	-	-	-	-	-	-	-	-
SRVP_Atabeya-1-FCNFGDKI_01230	SRVP_Atabeya-1_123 # 115734 # 116540 # -1 # ID=1_123;partial=00;start_type=ATG;rbs_motif=AGxAGG/AGGxGG;rbs_spacer=11-12bp;gc_cont=0.482	SRVP_Atabeya-1_123	SR-VP_11_27_2022_S1_100cm_MT	5	115734	116540	807	11625022	0.53297	arCOG01462	NatB	ABC-type_Na+_efflux_pump,_permease_component	C	COG1668	ABC-type_Na+_efflux_pump,_permease_component_NatB	CP	-
SRVP_Atabeya-1-FCNFGDKI_01250	SRVP_Atabeya-1_125 # 117683 # 118291 # 1 # ID=1_125;partial=00;start_type=ATG;rbs_motif=GGA/GAG/AGG;rbs_spacer=5-10bp;gc_cont=0.470	SRVP_Atabeya-1_125	SR-VP_11_27_2022_S1_100cm_MT	2	117683	118291	609	11625022	0.2825	arCOG01683	ArsR	Transcriptional_regulator_containing_HTH_domain,_ArsR_family	K	COG4189	Predicted_transcriptional_regulator,_ArsR_family	K	-
SRVP_Atabeya-1-FCNFGDKI_01310	SRVP_Atabeya-1_131 # 122963 # 124669 # 1 # ID=1_131;partial=00;start_type=ATG;rbs_motif=AGGA/GGAG/GAGG;rbs_spacer=11-12bp;gc_cont=0.494	SRVP_Atabeya-1_131	SR-VP_11_27_2022_S1_100cm_MT	3	122963	124669	1707	11625022	0.15118	arCOG00856	CaiC	Acyl-CoA_synthetase_(AMP-forming)/AMP-acid_ligase_II	I	COG0365	Acyl-coenzyme_A_synthetase/AMP-(fatty)_acid_ligase	I	-
SRVP_Atabeya-1-FCNFGDKI_01350	SRVP_Atabeya-1_135 # 125978 # 127186 # -1 # ID=1_135;partial=00;start_type=ATG;rbs_motif=GGA/GAG/AGG;rbs_spacer=11-12bp;gc_cont=0.525	SRVP_Atabeya-1_135	SR-VP_07_25_2022_A4_70cm_MT	1	125978	127186	1209	19546	42.3171	arCOG00130	-	MFS_family_permease	G	COG2814	Predicted_arabinose_efflux_permease_AraJ,_MFS_family	G	-
SRVP_Atabeya-1-FCNFGDKI_01420	SRVP_Atabeya-1_142 # 133707 # 135926 # -1 # ID=1_142;partial=00;start_type=ATG;rbs_motif=AGGAG(G)/GGAGG;rbs_spacer=13-15bp;gc_cont=0.505	SRVP_Atabeya-1_142	SR-VP_11_27_2022_S1_100cm_MT	1	133707	135926	2220	11625022	0.0387484	arCOG00641	PurL	Phosphoribosylformylglycinamidine_(FGAM)_synthase,_synthetase_domain	F	COG0046	Phosphoribosylformylglycinamidine_(FGAM)_synthase,_synthetase_domain	F	Purine_biosynthesis
SRVP_Atabeya-1-FCNFGDKI_01430	SRVP_Atabeya-1_143 # 135930 # 136640 # -1 # ID=1_143;partial=00;start_type=ATG;rbs_motif=GGxGG;rbs_spacer=5-10bp;gc_cont=0.491	SRVP_Atabeya-1_143	SR-VP_11_27_2022_S1_100cm_MT	1	135930	136640	711	11625022	0.120986	arCOG00102	PurL	Phosphoribosylformylglycinamidine_(FGAM)_synthase,_glutamine_amidotransferase_domain	F	COG0047	Phosphoribosylformylglycinamidine_(FGAM)_synthase,_glutamine_amidotransferase_domain	F	Purine_biosynthesis
SRVP_Atabeya-1-FCNFGDKI_01440	SRVP_Atabeya-1_144 # 136677 # 136943 # -1 # ID=1_144;partial=00;start_type=ATG;rbs_motif=GGAGG;rbs_spacer=5-10bp;gc_cont=0.494	SRVP_Atabeya-1_144	SR-VP_11_27_2022_S1_100cm_MT	1	136677	136943	267	11625022	0.322177	arCOG04462	PurS	Phosphoribosylformylglycinamidine_(FGAM)_synthase,_PurS_component	F	COG1828	Phosphoribosylformylglycinamidine_(FGAM)_synthase,_PurS_subunit	F	Purine_biosynthesis
SRVP_Atabeya-1-FCNFGDKI_01450	SRVP_Atabeya-1_145 # 137371 # 138270 # -1 # ID=1_145;partial=00;start_type=ATG;rbs_motif=4Base/6BMM;rbs_spacer=13-15bp;gc_cont=0.481	SRVP_Atabeya-1_145	SR-VP_11_27_2022_S1_100cm_MT	1	137371	138270	900	11625022	0.0955793	arCOG00338	SdhC	Succinate_dehydrogenase_subunit_C	C	COG2048	Heterodisulfide_reductase,_subunit_B	C	-
SRVP_Atabeya-1-FCNFGDKI_01460	SRVP_Atabeya-1_146 # 138278 # 138826 # -1 # ID=1_146;partial=00;start_type=ATG;rbs_motif=GGAG/GAGG;rbs_spacer=5-10bp;gc_cont=0.505	SRVP_Atabeya-1_146	SR-VP_11_27_2022_S1_100cm_MT	1	138278	138826	549	11625022	0.156687	arCOG00964	HdrC	Heterodisulfide_reductase,_subunit_C	C	COG1150	Heterodisulfide_reductase,_subunit_C	C	-
SRVP_Atabeya-1-FCNFGDKI_01480	SRVP_Atabeya-1_148 # 140115 # 141380 # -1 # ID=1_148;partial=00;start_type=ATG;rbs_motif=None;rbs_spacer=None;gc_cont=0.506	SRVP_Atabeya-1_148	SR-VP_11_27_2022_S1_100cm_MT	2	140115	141380	1266	11625022	0.135895	arCOG01107	ArgE	Acetylornithine_deacetylase/Succinyl-diaminopimelate_desuccinylase_or_related_deacylase	E	COG0624	Acetylornithine_deacetylase/Succinyl-diaminopimelate_desuccinylase_or_related_deacylase	E	Arginine_biosynthesis
SRVP_Atabeya-1-FCNFGDKI_01500	SRVP_Atabeya-1_150 # 141904 # 142896 # 1 # ID=1_150;partial=00;start_type=TTG;rbs_motif=GGA/GAG/AGG;rbs_spacer=5-10bp;gc_cont=0.510	SRVP_Atabeya-1_150	SR-VP_11_27_2022_S1_100cm_MT	3	141904	142896	993	11625022	0.259883	-	-	-	-	-	-	-	-
SRVP_Atabeya-1-FCNFGDKI_01500	SRVP_Atabeya-1_150 # 141904 # 142896 # 1 # ID=1_150;partial=00;start_type=TTG;rbs_motif=GGA/GAG/AGG;rbs_spacer=5-10bp;gc_cont=0.510	SRVP_Atabeya-1_150	SR-VP_11_27_2022_S2_40cm_MT	1	141904	142896	993	4025082	0.250193	-	-	-	-	-	-	-	-
SRVP_Atabeya-1-FCNFGDKI_01520	SRVP_Atabeya-1_152 # 144610 # 145917 # 1 # ID=1_152;partial=00;start_type=ATG;rbs_motif=GGA/GAG/AGG;rbs_spacer=11-12bp;gc_cont=0.479	SRVP_Atabeya-1_152	SR-VP_11_27_2022_S1_100cm_MT	2	144610	145917	1308	11625022	0.131531	arCOG01378	-	Uncharacterized_protein_of_the_AP_superfamily	R	COG1524	c-di-AMP_phosphodiesterase_AtaC_or_nucleotide_pyrophosphatase,_AlkP_superfamily	T	-
SRVP_Atabeya-1-FCNFGDKI_01560	SRVP_Atabeya-1_156 # 149291 # 150634 # -1 # ID=1_156;partial=00;start_type=ATG;rbs_motif=AGGA/GGAG/GAGG;rbs_spacer=11-12bp;gc_cont=0.522	SRVP_Atabeya-1_156	SR-VP_11_27_2022_S1_100cm_MT	1	149291	150634	1344	11625022	0.064004	arCOG02967	-	NACHT_family_NTPase_fused_to_HEAT_repeats_domain	T	COG1413	HEAT_repeat	R	-
SRVP_Atabeya-1-FCNFGDKI_01590	SRVP_Atabeya-1_159 # 152267 # 153340 # -1 # ID=1_159;partial=00;start_type=ATG;rbs_motif=AGGAGG;rbs_spacer=5-10bp;gc_cont=0.477	SRVP_Atabeya-1_159	SR-VP_11_27_2022_S1_100cm_MT	4	152267	153340	1074	11625022	0.320377	arCOG01274	LivM	ABC-type_branched-chain_amino_acid_transport_system,_permease_component	E	COG4177	ABC-type_branched-chain_amino_acid_transport_system,_permease_component	E	-
SRVP_Atabeya-1-FCNFGDKI_01610	SRVP_Atabeya-1_161 # 154459 # 155841 # -1 # ID=1_161;partial=00;start_type=ATG;rbs_motif=AGGA/GGAG/GAGG;rbs_spacer=11-12bp;gc_cont=0.490	SRVP_Atabeya-1_161	SR-VP_11_27_2022_S1_100cm_MT	234	154459	155841	1383	11625022	14.5546	arCOG01020	LivK	ABC-type_branched-chain_amino_acid_transport_system,_periplasmic_component	E	COG0683	ABC-type_branched-chain_amino_acid_transport_system,_periplasmic_component	E	-
SRVP_Atabeya-1-FCNFGDKI_01640	SRVP_Atabeya-1_164 # 157013 # 157360 # -1 # ID=1_164;partial=00;start_type=TTG;rbs_motif=AGGAG/GGAGG;rbs_spacer=11-12bp;gc_cont=0.523	SRVP_Atabeya-1_164	SR-VP_11_27_2022_S1_100cm_MT	2	157013	157360	348	11625022	0.494376	arCOG01268	Rpo6/RpoZ	DNA-directed_RNA_polymerase_subunit_K/omega	K	COG1758	DNA-directed_RNA_polymerase,_subunit_K/omega	K	RNA_polymerase
SRVP_Atabeya-1-FCNFGDKI_01820	SRVP_Atabeya-1_182 # 175290 # 180062 # -1 # ID=1_182;partial=00;start_type=TTG;rbs_motif=GGAG/GAGG;rbs_spacer=5-10bp;gc_cont=0.499	SRVP_Atabeya-1_182	SR-VP_11_27_2022_S1_100cm_MT	5	175290	180062	4773	11625022	0.0901124	-	-	-	-	-	-	-	-
SRVP_Atabeya-1-FCNFGDKI_01830	SRVP_Atabeya-1_183 # 180304 # 180789 # -1 # ID=1_183;partial=00;start_type=ATG;rbs_motif=GGA/GAG/AGG;rbs_spacer=5-10bp;gc_cont=0.457	SRVP_Atabeya-1_183	SR-VP_11_27_2022_S1_100cm_MT	1	180304	180789	486	11625022	0.176999	-	-	-	-	-	-	-	-
SRVP_Atabeya-1-FCNFGDKI_01840	SRVP_Atabeya-1_184 # 180847 # 181935 # -1 # ID=1_184;partial=00;start_type=ATG;rbs_motif=AGGAG(G)/GGAGG;rbs_spacer=13-15bp;gc_cont=0.482	SRVP_Atabeya-1_184	SR-VP_11_27_2022_S1_100cm_MT	6	180847	181935	1089	11625022	0.473947	-	-	-	-	COG4189	Predicted_transcriptional_regulator,_ArsR_family	K	-
SRVP_Atabeya-1-FCNFGDKI_01950	SRVP_Atabeya-1_195 # 191879 # 192871 # -1 # ID=1_195;partial=00;start_type=ATG;rbs_motif=GGAG/GAGG;rbs_spacer=5-10bp;gc_cont=0.502	SRVP_Atabeya-1_195	SR-VP_11_27_2022_S1_100cm_MT	4	191879	192871	993	11625022	0.346511	arCOG01981	SUA7	Transcription_initiation_factor_TFIIB,_Brf1_subunit/Transcription_initiation_factor_TFIIB	K	COG1405	Transcription_initiation_factor_TFIIIB,_Brf1_subunit/Transcription_initiation_factor_TFIIB	K	-
SRVP_Atabeya-1-FCNFGDKI_02060	SRVP_Atabeya-1_206 # 202592 # 203221 # -1 # ID=1_206;partial=00;start_type=ATG;rbs_motif=GGA/GAG/AGG;rbs_spacer=5-10bp;gc_cont=0.470	SRVP_Atabeya-1_206	SR-VP_11_27_2022_S1_100cm_MT	1	202592	203221	630	11625022	0.136542	arCOG01701	SEN2	tRNA_splicing_endonuclease	J	COG1676	tRNA_splicing_endonuclease_subunit_SEN34	J	tRNA_modification
SRVP_Atabeya-1-FCNFGDKI_02070	SRVP_Atabeya-1_207 # 203302 # 204012 # -1 # ID=1_207;partial=00;start_type=TTG;rbs_motif=3Base/5BMM;rbs_spacer=13-15bp;gc_cont=0.480	SRVP_Atabeya-1_207	SR-VP_11_27_2022_S1_80cm_MT	3	203302	204012	711	4000856	1.05463	arCOG02640	-	YkaA-like_protein_involved_in_regulation_of_phosphate_transport,_PhoU/UPF0111/DUF47_family	P	COG1392	Phosphate_transport_regulator_YkaA,_distantly_related_to_PhoU,_UPF0111/DUF47_family	P	-
SRVP_Atabeya-1-FCNFGDKI_02230	SRVP_Atabeya-1_223 # 220045 # 221832 # 1 # ID=1_223;partial=00;start_type=ATG;rbs_motif=GGA/GAG/AGG;rbs_spacer=5-10bp;gc_cont=0.507	SRVP_Atabeya-1_223	SR-VP_11_27_2022_S1_100cm_MT	1	220045	221832	1788	11625022	0.0481104	arCOG00187	Rli1	Translation_initiation_factor_RLI1,_contains_Fe-S_and_AAA+_ATPase_domains	J	COG1245	Translation_initiation_factor_RLI1,_contains_Fe-S_and_AAA+_ATPase_domains	J	-
SRVP_Atabeya-1-FCNFGDKI_02240	SRVP_Atabeya-1_224 # 222002 # 223129 # 1 # ID=1_224;partial=00;start_type=ATG;rbs_motif=AGGAG(G)/GGAGG;rbs_spacer=13-15bp;gc_cont=0.512	SRVP_Atabeya-1_224	SR-VP_11_27_2022_S1_100cm_MT	2	222002	223129	1128	11625022	0.15252	arCOG04180	-	Bifunctional_fructose-1,6-bisphosphate_aldolase/phosphatase__FBPA/FBPase	G	COG1980	Archaeal_fructose_1,6-bisphosphatase	G	-
SRVP_Atabeya-1-FCNFGDKI_02260	SRVP_Atabeya-1_226 # 223819 # 224508 # 1 # ID=1_226;partial=00;start_type=TTG;rbs_motif=None;rbs_spacer=None;gc_cont=0.522	SRVP_Atabeya-1_226	SR-VP_11_27_2022_S1_100cm_MT	1	223819	224508	690	11625022	0.124669	arCOG01087	TpiA	Triosephosphate_isomerase	G	COG0149	Triosephosphate_isomerase	G	Glycolysis
SRVP_Atabeya-1-FCNFGDKI_02270	SRVP_Atabeya-1_227 # 224600 # 225490 # 1 # ID=1_227;partial=00;start_type=TTG;rbs_motif=AGGAG;rbs_spacer=5-10bp;gc_cont=0.471	SRVP_Atabeya-1_227	SR-VP_11_27_2022_S1_100cm_MT	2	224600	225490	891	11625022	0.193089	arCOG04410	-	Predicted_ATP-grasp_domain_fused_to_redox_center	R	COG1578	House-cleaning_carbohydrate_phosphatase,_DUF89_family	V	-
SRVP_Atabeya-1-FCNFGDKI_02280	SRVP_Atabeya-1_228 # 225491 # 229225 # -1 # ID=1_228;partial=00;start_type=TTG;rbs_motif=AGxAGG/AGGxGG;rbs_spacer=5-10bp;gc_cont=0.503	SRVP_Atabeya-1_228	SR-VP_11_27_2022_S1_100cm_MT	6	225491	229225	3735	11625022	0.138187	arCOG00702	AprE	Predicted_multidomain_toxin,_contains_peptidase_S8_domain,_delivery_module_and_Rnase_A_domain	V	COG3225	ABC-type_uncharacterized_transport_system_involved_in_gliding_motility,_auxiliary_component	N	-
SRVP_Atabeya-1-FCNFGDKI_02290	SRVP_Atabeya-1_229 # 229649 # 230782 # -1 # ID=1_229;partial=00;start_type=ATG;rbs_motif=AGGAG/GGAGG;rbs_spacer=11-12bp;gc_cont=0.497	SRVP_Atabeya-1_229	SR-VP_11_27_2022_S1_100cm_MT	1	229649	230782	1134	11625022	0.0758566	arCOG01000	PepP	Xaa-Pro_aminopeptidase	E	COG0006	Xaa-Pro_aminopeptidase	E	-
SRVP_Atabeya-1-FCNFGDKI_02390	SRVP_Atabeya-1_239 # 240287 # 240988 # -1 # ID=1_239;partial=00;start_type=TTG;rbs_motif=AGGAGG;rbs_spacer=5-10bp;gc_cont=0.486	SRVP_Atabeya-1_239	SR-VP_11_27_2022_S1_100cm_MT	1	240287	240988	702	11625022	0.122538	arCOG04122	Emg1	rRNA_pseudouridine-1189_N-methylase_Emg1,_Nep1/Mra1_family	J	COG1756	rRNA_pseudouridine-1189_N-methylase_Emg1,_Nep1/Mra1_family	J	-
SRVP_Atabeya-1-FCNFGDKI_02480	SRVP_Atabeya-1_248 # 246282 # 247220 # 1 # ID=1_248;partial=00;start_type=TTG;rbs_motif=GGAG/GAGG;rbs_spacer=5-10bp;gc_cont=0.477	SRVP_Atabeya-1_248	SR-VP_11_27_2022_S1_100cm_MT	1	246282	247220	939	11625022	0.0916095	arCOG00912	ArgF	Ornithine_carbamoyltransferase	E	COG0078	Ornithine_carbamoyltransferase	E	Arginine_biosynthesis
SRVP_Atabeya-1-FCNFGDKI_02490	SRVP_Atabeya-1_249 # 247362 # 247538 # 1 # ID=1_249;partial=00;start_type=GTG;rbs_motif=GGA/GAG/AGG;rbs_spacer=5-10bp;gc_cont=0.469	SRVP_Atabeya-1_249	SR-VP_11_27_2022_S1_100cm_MT	6	247362	247538	177	11625022	2.91598	arCOG02204	Sss1	Preprotein_translocase_subunit_Sss1	U	COG2443	Preprotein_translocase_subunit_Sss1	U	-
SRVP_Atabeya-1-FCNFGDKI_02530	SRVP_Atabeya-1_253 # 249626 # 250432 # 1 # ID=1_253;partial=00;start_type=ATG;rbs_motif=3Base/5BMM;rbs_spacer=13-15bp;gc_cont=0.475	SRVP_Atabeya-1_253	SR-VP_11_27_2022_S1_100cm_MT	4	249626	250432	807	11625022	0.426376	arCOG04288	RplJ	Ribosomal_protein_L10	J	COG0244	Ribosomal_protein_L10	J	Ribosome_50S_subunit
SRVP_Atabeya-1-FCNFGDKI_02600	SRVP_Atabeya-1_260 # 258293 # 259300 # -1 # ID=1_260;partial=00;start_type=TTG;rbs_motif=GGxGG;rbs_spacer=5-10bp;gc_cont=0.559	SRVP_Atabeya-1_260	SR-VP_11_27_2022_S1_100cm_MT	1	258293	259300	1008	11625022	0.0853386	arCOG00638	ThiL	Thiamine_monophosphate_kinase	H	COG0611	Thiamine_monophosphate_kinase	H	Thiamine_biosynthesis
SRVP_Atabeya-1-FCNFGDKI_02670	SRVP_Atabeya-1_267 # 267916 # 269721 # 1 # ID=1_267;partial=00;start_type=TTG;rbs_motif=GGxGG;rbs_spacer=5-10bp;gc_cont=0.500	SRVP_Atabeya-1_267	SR-VP_11_27_2022_S1_100cm_MT	2	267916	269721	1806	11625022	0.0952617	-	-	-	-	-	-	-	-
SRVP_Atabeya-1-FCNFGDKI_02680	SRVP_Atabeya-1_268 # 269843 # 270031 # 1 # ID=1_268;partial=00;start_type=ATG;rbs_motif=AGGAGG;rbs_spacer=11-12bp;gc_cont=0.508	SRVP_Atabeya-1_268	SR-VP_11_27_2022_S1_100cm_MT	2	269843	270031	189	11625022	0.910279	arCOG01611	NapF	Ferredoxin	C	COG1149	MinD_superfamily_P-loop_ATPase,_contains_an_inserted_ferredoxin_domain	R	-
SRVP_Atabeya-1-FCNFGDKI_02690	SRVP_Atabeya-1_269 # 270493 # 271851 # 1 # ID=1_269;partial=00;start_type=ATG;rbs_motif=GGAG/GAGG;rbs_spacer=5-10bp;gc_cont=0.499	SRVP_Atabeya-1_269	SR-VP_11_27_2022_S1_100cm_MT	1	270493	271851	1359	11625022	0.0632975	arCOG00918	HemL	Glutamate-1-semialdehyde_aminotransferase	H	COG0001	Glutamate-1-semialdehyde_aminotransferase	H	Heme_biosynthesis
SRVP_Atabeya-1-FCNFGDKI_02720	SRVP_Atabeya-1_272 # 273833 # 274120 # -1 # ID=1_272;partial=00;start_type=ATG;rbs_motif=GGA/GAG/AGG;rbs_spacer=11-12bp;gc_cont=0.438	SRVP_Atabeya-1_272	SR-VP_11_27_2022_S1_100cm_MT	1	273833	274120	288	11625022	0.298685	-	-	-	-	-	-	-	-
SRVP_Atabeya-1-FCNFGDKI_02850	SRVP_Atabeya-1_285 # 287191 # 287973 # 1 # ID=1_285;partial=00;start_type=ATG;rbs_motif=GGA/GAG/AGG;rbs_spacer=5-10bp;gc_cont=0.470	SRVP_Atabeya-1_285	SR-VP_11_27_2022_S1_100cm_MT	1	287191	287973	783	11625022	0.109861	arCOG03850	-	Predicted_O-methyltransferase_YrrM	R	COG3510	Cephalosporin_hydroxylase	V	-
SRVP_Atabeya-1-FCNFGDKI_02860	SRVP_Atabeya-1_286 # 288183 # 290432 # 1 # ID=1_286;partial=00;start_type=TTG;rbs_motif=GGA/GAG/AGG;rbs_spacer=5-10bp;gc_cont=0.505	SRVP_Atabeya-1_286	SR-VP_11_27_2022_S1_100cm_MT	3	288183	290432	2250	11625022	0.114695	arCOG02895	MutS2	DNA_structure-specific_ATPase_involved_in_suppression_of_recombination,_MutS_family	L	COG1193	dsDNA-specific_endonuclease/ATPase_MutS2	L	-
SRVP_Atabeya-1-FCNFGDKI_02930	SRVP_Atabeya-1_293 # 295574 # 296515 # -1 # ID=1_293;partial=00;start_type=TTG;rbs_motif=3Base/5BMM;rbs_spacer=13-15bp;gc_cont=0.522	SRVP_Atabeya-1_293	SR-VP_11_27_2022_S1_100cm_MT	6	295574	296515	942	11625022	0.547907	arCOG04174	TYW1	Wybutosine_(yW)_biosynthesis_enzyme,_Fe-S_oxidoreductase	J	COG0731	Wyosine_[tRNA(Phe)-imidazoG37]_synthetase,_radical_SAM_superfamily	J	tRNA_modification
SRVP_Atabeya-1-FCNFGDKI_03210	SRVP_Atabeya-1_321 # 319283 # 320404 # -1 # ID=1_321;partial=00;start_type=ATG;rbs_motif=GGA/GAG/AGG;rbs_spacer=11-12bp;gc_cont=0.482	SRVP_Atabeya-1_321	SR-VP_07_25_2022_A1_70cm_MT	1	319283	320404	1122	125142	7.12203	arCOG04881	-	PHP_family_phosphoesterase_with_a_Zn_ribbon	R	COG1379	PHP_family_phosphoesterase_with_a_Zn_ribbon	R	-
SRVP_Atabeya-1-FCNFGDKI_03240	SRVP_Atabeya-1_324 # 323421 # 324587 # 1 # ID=1_324;partial=00;start_type=ATG;rbs_motif=AGxAGG/AGGxGG;rbs_spacer=5-10bp;gc_cont=0.504	SRVP_Atabeya-1_324	SR-VP_11_27_2022_S1_100cm_MT	1	323421	324587	1167	11625022	0.0737115	arCOG01307	Vps4	Cell_division_ATPase_of_the_AAA+_class,_ESCRT_system_component	D	COG1222	ATP-dependent_26S_proteasome_regulatory_subunit	O	-
SRVP_Atabeya-1-FCNFGDKI_03270	SRVP_Atabeya-1_327 # 326171 # 327409 # -1 # ID=1_327;partial=00;start_type=TTG;rbs_motif=AGGAG;rbs_spacer=5-10bp;gc_cont=0.525	SRVP_Atabeya-1_327	SR-VP_11_27_2022_S1_80cm_MT	1	326171	327409	1239	4000856	0.201732	arCOG00679	-	Transposable_element,_IS605_OrfB_family,_contains_RNAse_H_fold_nuclease_and_Zn_finger_domains	X	COG0675	Transposase	X	-
SRVP_Atabeya-1-FCNFGDKI_03290	SRVP_Atabeya-1_329 # 328467 # 329258 # -1 # ID=1_329;partial=00;start_type=TTG;rbs_motif=AGxAGG/AGGxGG;rbs_spacer=5-10bp;gc_cont=0.515	SRVP_Atabeya-1_329	SR-VP_11_27_2022_S1_40cm_MT	1	328467	329258	792	1473124	0.857108	-	-	-	-	COG5078	Ubiquitin-protein_ligase	O	-
SRVP_Atabeya-1-FCNFGDKI_03300	SRVP_Atabeya-1_330 # 329449 # 329898 # 1 # ID=1_330;partial=00;start_type=TTG;rbs_motif=GGxGG;rbs_spacer=5-10bp;gc_cont=0.531	SRVP_Atabeya-1_330	SR-VP_11_27_2022_S1_100cm_MT	1	329449	329898	450	11625022	0.191159	arCOG01138	Rri1	Proteasome_lid_subunit_RPN8/RPN11,_contains_Jab1/MPN_domain_metalloenzyme_(JAMM)_motif	O	COG1310	Proteasome_lid_subunit_RPN8/RPN11,_contains_Jab1/MPN_domain_metalloenzyme_(JAMM)_motif	O	-
SRVP_Atabeya-1-FCNFGDKI_03310	SRVP_Atabeya-1_331 # 329948 # 330739 # -1 # ID=1_331;partial=00;start_type=ATG;rbs_motif=4Base/6BMM;rbs_spacer=13-15bp;gc_cont=0.505	SRVP_Atabeya-1_331	SR-VP_11_27_2022_S1_100cm_MT	1	329948	330739	792	11625022	0.108613	-	-	-	-	COG4768	Uncharacterized_conserved_protein_YoxC,_contains_an_MCP-like_domain	S	-
SRVP_Atabeya-1-FCNFGDKI_03350	SRVP_Atabeya-1_335 # 333320 # 333784 # -1 # ID=1_335;partial=00;start_type=ATG;rbs_motif=None;rbs_spacer=None;gc_cont=0.467	SRVP_Atabeya-1_335	SR-VP_11_27_2022_S1_80cm_MT	1	333320	333784	465	4000856	0.537519	-	-	-	-	-	-	-	-
SRVP_Atabeya-1-FCNFGDKI_03380	SRVP_Atabeya-1_338 # 335770 # 336915 # 1 # ID=1_338;partial=00;start_type=TTG;rbs_motif=AGxAGG/AGGxGG;rbs_spacer=5-10bp;gc_cont=0.501	SRVP_Atabeya-1_338	SR-VP_11_27_2022_S1_100cm_MT	3	335770	336915	1146	11625022	0.225187	arCOG00324	AcuC	Deacetylase,_including_yeast_histone_deacetylase_and_acetoin_utilization_protein	R	COG0123	Acetoin_utilization_deacetylase_AcuC_or_a_related_deacetylase	Q	-
SRVP_Atabeya-1-FCNFGDKI_03400	SRVP_Atabeya-1_340 # 341206 # 341985 # -1 # ID=1_340;partial=00;start_type=TTG;rbs_motif=GGAG/GAGG;rbs_spacer=5-10bp;gc_cont=0.526	SRVP_Atabeya-1_340	SR-VP_11_27_2022_S1_100cm_MT	1	341206	341985	780	11625022	0.110284	arCOG04853	-	Predicted_metal-binding_transcription_factor	K	COG4008	Predicted_metal-binding_transcription_factor,_methanogenesis_marker_domain_9	K	-
SRVP_Atabeya-1-FCNFGDKI_03450	SRVP_Atabeya-1_345 # 351219 # 352955 # -1 # ID=1_345;partial=00;start_type=ATG;rbs_motif=GGxGG;rbs_spacer=5-10bp;gc_cont=0.483	SRVP_Atabeya-1_345	SR-VP_11_27_2022_S1_100cm_MT	1	351219	352955	1737	11625022	0.0495229	arCOG00280	-	HerA_helicase	L	COG0433	Archaeal_DNA_helicase_HerA_or_a_related_bacterial_ATPase,_contains_HAS-barrel_and_ATPase_domains	L	-
SRVP_Atabeya-1-FCNFGDKI_03470	SRVP_Atabeya-1_347 # 354415 # 355314 # -1 # ID=1_347;partial=00;start_type=GTG;rbs_motif=GGAG/GAGG;rbs_spacer=5-10bp;gc_cont=0.499	SRVP_Atabeya-1_347	SR-VP_11_27_2022_S1_100cm_MT	3	354415	355314	900	11625022	0.286738	arCOG00362	Srp102	Signal_recognition_particle_receptor_subunit_beta,_a_GTPase	U	COG1100	GTPase_SAR1_family_domain	R	-
SRVP_Atabeya-1-FCNFGDKI_03500	SRVP_Atabeya-1_350 # 357155 # 358108 # 1 # ID=1_350;partial=00;start_type=ATG;rbs_motif=None;rbs_spacer=None;gc_cont=0.486	SRVP_Atabeya-1_350	SR-VP_11_27_2022_S1_40cm_MT	1	357155	358108	954	1473124	0.711561	arCOG00973	RsmB	16S_rRNA_C967_or_C1407_C5-methylase,_RsmB/RsmF_family	J	COG3270	Ribosome_biogenesis_protein,_NOL1/NOP2/FMU_family	J	-
SRVP_Atabeya-1-FCNFGDKI_03550	SRVP_Atabeya-1_355 # 361409 # 362089 # 1 # ID=1_355;partial=00;start_type=TTG;rbs_motif=AGGA/GGAG/GAGG;rbs_spacer=11-12bp;gc_cont=0.496	SRVP_Atabeya-1_355	SR-VP_11_27_2022_S1_100cm_MT	1	361409	362089	681	11625022	0.126316	arCOG00970	PRE1	20S_proteasome,_beta_subunit	O	COG0638	20S_proteasome,_alpha_and_beta_subunits	O	-
SRVP_Atabeya-1-FCNFGDKI_03610	SRVP_Atabeya-1_361 # 366608 # 367027 # 1 # ID=1_361;partial=00;start_type=ATG;rbs_motif=GGA/GAG/AGG;rbs_spacer=5-10bp;gc_cont=0.498	SRVP_Atabeya-1_361	SR-VP_11_27_2022_S1_100cm_MT	4	366608	367027	420	11625022	0.819251	-	-	-	-	-	-	-	-
SRVP_Atabeya-1-FCNFGDKI_03650	SRVP_Atabeya-1_365 # 369540 # 370016 # 1 # ID=1_365;partial=00;start_type=ATG;rbs_motif=3Base/5BMM;rbs_spacer=13-15bp;gc_cont=0.488	SRVP_Atabeya-1_365	SR-VP_11_27_2022_S1_100cm_MT	1	369540	370016	477	11625022	0.180338	arCOG04098	RplV	Ribosomal_protein_L22	J	COG0091	Ribosomal_protein_L22	J	Ribosome_50S_subunit
SRVP_Atabeya-1-FCNFGDKI_03660	SRVP_Atabeya-1_366 # 370032 # 370910 # 1 # ID=1_366;partial=00;start_type=TTG;rbs_motif=AGGA/GGAG/GAGG;rbs_spacer=11-12bp;gc_cont=0.497	SRVP_Atabeya-1_366	SR-VP_11_27_2022_S1_100cm_MT	1	370032	370910	879	11625022	0.0978627	arCOG04097	RpsC	Ribosomal_protein_S3	J	COG0092	Ribosomal_protein_S3	J	Ribosome_30S_subunit
SRVP_Atabeya-1-FCNFGDKI_03770	SRVP_Atabeya-1_377 # 376594 # 377181 # 1 # ID=1_377;partial=00;start_type=ATG;rbs_motif=GGAG/GAGG;rbs_spacer=5-10bp;gc_cont=0.502	SRVP_Atabeya-1_377	SR-VP_11_27_2022_S1_40cm_MT	1	376594	377181	588	1473124	1.15447	arCOG00781	RPL32	Ribosomal_protein_L32E	J	COG1717	Ribosomal_protein_L32E	J	Archaeal_ribosomal_proteins
SRVP_Atabeya-1-FCNFGDKI_03770	SRVP_Atabeya-1_377 # 376594 # 377181 # 1 # ID=1_377;partial=00;start_type=ATG;rbs_motif=GGAG/GAGG;rbs_spacer=5-10bp;gc_cont=0.502	SRVP_Atabeya-1_377	SR-VP_11_27_2022_S1_100cm_MT	1	376594	377181	588	11625022	0.146295	arCOG00781	RPL32	Ribosomal_protein_L32E	J	COG1717	Ribosomal_protein_L32E	J	Archaeal_ribosomal_proteins
SRVP_Atabeya-1-FCNFGDKI_03890	SRVP_Atabeya-1_389 # 383847 # 384611 # 1 # ID=1_389;partial=00;start_type=GTG;rbs_motif=GGxGG;rbs_spacer=11-12bp;gc_cont=0.497	SRVP_Atabeya-1_389	SR-VP_11_27_2022_S1_100cm_MT	3	383847	384611	765	11625022	0.337339	arCOG00987	TruB	Pseudouridine_synthase	J	COG0130	tRNA_U55_pseudouridine_synthase_TruB,_may_also_work_on_U342_of_tmRNA	J	tRNA_modification
SRVP_Atabeya-1-FCNFGDKI_03930	SRVP_Atabeya-1_393 # 387099 # 387737 # 1 # ID=1_393;partial=00;start_type=TTG;rbs_motif=GGAGG;rbs_spacer=5-10bp;gc_cont=0.498	SRVP_Atabeya-1_393	SR-VP_11_27_2022_S1_100cm_MT	1	387099	387737	639	11625022	0.134619	arCOG04240	RpsK	Ribosomal_protein_S11	J	COG0100	Ribosomal_protein_S11	J	Ribosome_30S_subunit
SRVP_Atabeya-1-FCNFGDKI_03940	SRVP_Atabeya-1_394 # 387915 # 388736 # 1 # ID=1_394;partial=00;start_type=ATG;rbs_motif=GGA/GAG/AGG;rbs_spacer=5-10bp;gc_cont=0.483	SRVP_Atabeya-1_394	SR-VP_11_27_2022_S1_100cm_MT	2	387915	388736	822	11625022	0.209298	arCOG04241	RpoA/Rpo1	DNA-directed_RNA_polymerase_subunit_D	K	COG0202	DNA-directed_RNA_polymerase,_alpha_subunit/40_kD_subunit	K	RNA_polymerase
SRVP_Atabeya-1-FCNFGDKI_03950	SRVP_Atabeya-1_395 # 388744 # 389109 # 1 # ID=1_395;partial=00;start_type=ATG;rbs_motif=GGA/GAG/AGG;rbs_spacer=11-12bp;gc_cont=0.475	SRVP_Atabeya-1_395	SR-VP_11_27_2022_S1_100cm_MT	1	388744	389109	366	11625022	0.235031	arCOG00780	RPL18A	Ribosomal_protein_L18E	J	COG1727	Ribosomal_protein_L18E	J	Archaeal_ribosomal_proteins
SRVP_Atabeya-1-FCNFGDKI_04310	SRVP_Atabeya-1_431 # 417506 # 417883 # 1 # ID=1_431;partial=00;start_type=ATG;rbs_motif=3Base/5BMM;rbs_spacer=13-15bp;gc_cont=0.466	SRVP_Atabeya-1_431	SR-VP_11_27_2022_S1_100cm_MT	1	417506	417883	378	11625022	0.22757	arCOG05763	-	Uncharacterized_protein	S	COG4003	Uncharacterized_conserved_protein,_DUF2095_family	S	-
SRVP_Atabeya-1-FCNFGDKI_04390	SRVP_Atabeya-1_439 # 424295 # 425014 # 1 # ID=1_439;partial=00;start_type=TTG;rbs_motif=AGGAGG;rbs_spacer=5-10bp;gc_cont=0.494	SRVP_Atabeya-1_439	SR-VP_11_27_2022_S1_100cm_MT	1	424295	425014	720	11625022	0.119474	arCOG00971	PRE1	20S_proteasome,_alpha_subunit	O	COG0638	20S_proteasome,_alpha_and_beta_subunits	O	-
SRVP_Atabeya-1-FCNFGDKI_04620	SRVP_Atabeya-1_462 # 442373 # 443626 # 1 # ID=1_462;partial=00;start_type=ATG;rbs_motif=GGA/GAG/AGG;rbs_spacer=5-10bp;gc_cont=0.497	SRVP_Atabeya-1_462	SR-VP_11_27_2022_S1_100cm_MT	4	442373	443626	1254	11625022	0.27439	arCOG01742	eRF1	Peptide_chain_release_factor_eRF1	J	COG1503	Peptide_chain_release_factor_1_(eRF1)	J	Translation_factors
SRVP_Atabeya-1-FCNFGDKI_04680	SRVP_Atabeya-1_468 # 449628 # 450383 # 1 # ID=1_468;partial=00;start_type=ATG;rbs_motif=AGGAGG;rbs_spacer=5-10bp;gc_cont=0.492	SRVP_Atabeya-1_468	SR-VP_11_27_2022_S1_100cm_MT	161	449628	450383	756	11625022	18.3194	-	-	-	-	COG2852	Very-short-patch-repair_endonuclease	L	-
SRVP_Atabeya-1-FCNFGDKI_04750	SRVP_Atabeya-1_475 # 455905 # 456282 # -1 # ID=1_475;partial=00;start_type=TTG;rbs_motif=AGGAG/GGAGG;rbs_spacer=11-12bp;gc_cont=0.593	SRVP_Atabeya-1_475	SR-VP_11_27_2022_S1_100cm_MT	7446	455905	456282	378	11625022	1694.48	-	-	-	-	-	-	-	-
SRVP_Atabeya-1-FCNFGDKI_04750	SRVP_Atabeya-1_475 # 455905 # 456282 # -1 # ID=1_475;partial=00;start_type=TTG;rbs_motif=AGGAG/GGAGG;rbs_spacer=11-12bp;gc_cont=0.593	SRVP_Atabeya-1_475	SR-VP_11_27_2022_S1_80cm_MT	72	455905	456282	378	4000856	47.6089	-	-	-	-	-	-	-	-
SRVP_Atabeya-1-FCNFGDKI_04760	SRVP_Atabeya-1_476 # 457875 # 458597 # -1 # ID=1_476;partial=00;start_type=TTG;rbs_motif=AGxAG;rbs_spacer=5-10bp;gc_cont=0.550	SRVP_Atabeya-1_476	SR-VP_11_27_2022_S1_100cm_MT	151	457875	458597	723	11625022	17.9657	-	-	-	-	-	-	-	-
SRVP_Atabeya-1-FCNFGDKI_04780	SRVP_Atabeya-1_478 # 459299 # 460564 # 1 # ID=1_478;partial=00;start_type=ATG;rbs_motif=GGA/GAG/AGG;rbs_spacer=5-10bp;gc_cont=0.552	SRVP_Atabeya-1_478	SR-VP_11_27_2022_S1_100cm_MT	3	459299	460564	1266	11625022	0.203842	arCOG02046	-	Nickel-dependent_lactate_racemase	C	COG3875	Nickel-dependent_lactate_racemase	M	-
SRVP_Atabeya-1-FCNFGDKI_04840	SRVP_Atabeya-1_484 # 466665 # 467150 # 1 # ID=1_484;partial=00;start_type=TTG;rbs_motif=GGA/GAG/AGG;rbs_spacer=5-10bp;gc_cont=0.502	SRVP_Atabeya-1_484	SR-VP_11_27_2022_S1_40cm_MT	1	466665	467150	486	1473124	1.39677	arCOG00778	MaoC	Acyl_dehydratase	I	COG2030	Acyl-CoA_dehydratase_PaaZ	I	-
SRVP_Atabeya-1-FCNFGDKI_04850	SRVP_Atabeya-1_485 # 467174 # 467599 # 1 # ID=1_485;partial=00;start_type=ATG;rbs_motif=GGA/GAG/AGG;rbs_spacer=5-10bp;gc_cont=0.514	SRVP_Atabeya-1_485	SR-VP_11_27_2022_S1_100cm_MT	1	467174	467599	426	11625022	0.201928	arCOG00774	Mch	Mesaconyl-CoA_hydratase_(Acyl_dehydratase_family)	I	COG2030	Acyl-CoA_dehydratase_PaaZ	I	-
SRVP_Atabeya-1-FCNFGDKI_05060	SRVP_Atabeya-1_506 # 484815 # 485981 # -1 # ID=1_506;partial=00;start_type=ATG;rbs_motif=GGA/GAG/AGG;rbs_spacer=5-10bp;gc_cont=0.486	SRVP_Atabeya-1_506	SR-VP_11_27_2022_S1_100cm_MT	13	484815	485981	1167	11625022	0.95825	arCOG00541	YSH1	5-3_Exoribonuclease_of_the_beta-lactamase_fold_involved_in_RNA_processing	J	COG1236	RNA_processing_exonuclease,_beta-lactamase_fold,_Cft2_family	J	-
SRVP_Atabeya-1-FCNFGDKI_05360	SRVP_Atabeya-1_536 # 505917 # 507614 # 1 # ID=1_536;partial=00;start_type=ATG;rbs_motif=GGAG/GAGG;rbs_spacer=5-10bp;gc_cont=0.507	SRVP_Atabeya-1_536	SR-VP_11_27_2022_S1_100cm_MT	2	505917	507614	1698	11625022	0.101321	arCOG04116	-	ATPase_(PilT_family)	R	COG1855	Predicted_ATPase,_PilT_family,_contains_N-terminal_PIN_domain	UW	-
SRVP_Atabeya-1-FCNFGDKI_05610	SRVP_Atabeya-1_561 # 532506 # 533114 # -1 # ID=1_561;partial=00;start_type=TTG;rbs_motif=GGxGG;rbs_spacer=5-10bp;gc_cont=0.475	SRVP_Atabeya-1_561	SR-VP_11_27_2022_S1_100cm_MT	4	532506	533114	609	11625022	0.565001	-	-	-	-	COG5491	Archaeal_cell_division_protein_CdvB,_Snf7/Vps24/ESCRT-III_family	D	-
SRVP_Atabeya-1-FCNFGDKI_06070	SRVP_Atabeya-1_607 # 570096 # 570404 # -1 # ID=1_607;partial=00;start_type=ATG;rbs_motif=None;rbs_spacer=None;gc_cont=0.456	SRVP_Atabeya-1_607	SR-VP_11_27_2022_S1_100cm_MT	6	570096	570404	309	11625022	1.67032	arCOG01758	RpsJ	Ribosomal_protein_S10	J	COG0051	Ribosomal_protein_S10	J	Ribosome_30S_subunit
SRVP_Atabeya-1-FCNFGDKI_06080	SRVP_Atabeya-1_608 # 570462 # 571763 # -1 # ID=1_608;partial=00;start_type=ATG;rbs_motif=AGGAG;rbs_spacer=5-10bp;gc_cont=0.501	SRVP_Atabeya-1_608	SR-VP_11_27_2022_S1_100cm_MT	7	570462	571763	1302	11625022	0.46248	arCOG01561	TEF1	Translation_elongation_factor_EF-1_alpha,__GTPase	J	COG5256	Translation_elongation_factor_EF-1alpha_(GTPase)	J	Translation_factors
SRVP_Atabeya-1-FCNFGDKI_06150	SRVP_Atabeya-1_615 # 578585 # 579544 # 1 # ID=1_615;partial=00;start_type=TTG;rbs_motif=GGA/GAG/AGG;rbs_spacer=5-10bp;gc_cont=0.509	SRVP_Atabeya-1_615	SR-VP_11_27_2022_S1_100cm_MT	1	578585	579544	960	11625022	0.0896056	arCOG02849	ArsA	Oxyanion-translocating_ATPase	P	COG0003	Anion-transporting_ATPase,_ArsA/GET3_family	P	-
SRVP_Atabeya-1-FCNFGDKI_06170	SRVP_Atabeya-1_617 # 581326 # 582474 # 1 # ID=1_617;partial=00;start_type=ATG;rbs_motif=None;rbs_spacer=None;gc_cont=0.485	SRVP_Atabeya-1_617	SR-VP_11_27_2022_S1_100cm_MT	5	581326	582474	1149	11625022	0.374331	arCOG00666	GCD1	N-acetylglucosamine-1-phosphate_uridyltransferase	M	COG1213	Choline_kinase	I	-
SRVP_Atabeya-1-FCNFGDKI_06180	SRVP_Atabeya-1_618 # 582471 # 583163 # 1 # ID=1_618;partial=00;start_type=TTG;rbs_motif=GGA/GAG/AGG;rbs_spacer=5-10bp;gc_cont=0.499	SRVP_Atabeya-1_618	SR-VP_11_27_2022_S1_100cm_MT	4	582471	583163	693	11625022	0.496516	arCOG00670	PgsA	Phosphatidylglycerophosphate_synthase	I	COG0558	Phosphatidylglycerophosphate_synthase	I	Phospholipid_biosynthesis
SRVP_Atabeya-1-FCNFGDKI_06220	SRVP_Atabeya-1_622 # 585259 # 586407 # 1 # ID=1_622;partial=00;start_type=ATG;rbs_motif=GGA/GAG/AGG;rbs_spacer=11-12bp;gc_cont=0.495	SRVP_Atabeya-1_622	SR-VP_11_27_2022_S1_100cm_MT	60	585259	586407	1149	11625022	4.49198	arCOG03061	MreB	Actin-like_ATPase_involved_in_cell_morphogenesis	D	COG5277	Actin-related_protein	Z	-
SRVP_Atabeya-1-FCNFGDKI_06230	SRVP_Atabeya-1_623 # 586321 # 586560 # -1 # ID=1_623;partial=00;start_type=ATG;rbs_motif=None;rbs_spacer=None;gc_cont=0.487	SRVP_Atabeya-1_623	SR-VP_11_27_2022_S1_100cm_MT	2	586321	586560	240	11625022	0.716845	-	-	-	-	-	-	-	-
SRVP_Atabeya-1-FCNFGDKI_06320	SRVP_Atabeya-1_632 # 594442 # 595779 # -1 # ID=1_632;partial=00;start_type=ATG;rbs_motif=GGA/GAG/AGG;rbs_spacer=5-10bp;gc_cont=0.521	SRVP_Atabeya-1_632	SR-VP_11_27_2022_S1_100cm_MT	38	594442	595779	1338	11625022	2.44306	-	-	-	-	-	-	-	-
SRVP_Atabeya-1-FCNFGDKI_06330	SRVP_Atabeya-1_633 # 596580 # 598190 # -1 # ID=1_633;partial=00;start_type=GTG;rbs_motif=GGA/GAG/AGG;rbs_spacer=5-10bp;gc_cont=0.495	SRVP_Atabeya-1_633	SR-VP_11_27_2022_S1_100cm_MT	43	596580	598190	1611	11625022	2.29604	-	-	-	-	-	-	-	-
SRVP_Atabeya-1-FCNFGDKI_06340	SRVP_Atabeya-1_634 # 598196 # 598342 # -1 # ID=1_634;partial=00;start_type=ATG;rbs_motif=GGAG/GAGG;rbs_spacer=5-10bp;gc_cont=0.537	SRVP_Atabeya-1_634	SR-VP_11_27_2022_S1_100cm_MT	1	598196	598342	147	11625022	0.585179	-	-	-	-	-	-	-	-
SRVP_Atabeya-1-FCNFGDKI_06350	SRVP_Atabeya-1_635 # 598801 # 599850 # -1 # ID=1_635;partial=00;start_type=ATG;rbs_motif=GGA/GAG/AGG;rbs_spacer=5-10bp;gc_cont=0.477	SRVP_Atabeya-1_635	SR-VP_11_27_2022_S1_100cm_MT	5	598801	599850	1050	11625022	0.409625	arCOG07581	-	Glycosyl_hydrolase_family_18,_contains_cellulose_binding_domain	G	-	-	-	-
SRVP_Atabeya-1-FCNFGDKI_06370	SRVP_Atabeya-1_637 # 601149 # 602027 # 1 # ID=1_637;partial=00;start_type=TTG;rbs_motif=GGAGG;rbs_spacer=5-10bp;gc_cont=0.451	SRVP_Atabeya-1_637	SR-VP_11_27_2022_S1_80cm_MT	1	601149	602027	879	4000856	0.284353	arCOG06575	-	DpmII-like_restriction_endonuclease	V	-	-	-	-
SRVP_Atabeya-1-FCNFGDKI_06370	SRVP_Atabeya-1_637 # 601149 # 602027 # 1 # ID=1_637;partial=00;start_type=TTG;rbs_motif=GGAGG;rbs_spacer=5-10bp;gc_cont=0.451	SRVP_Atabeya-1_637	SR-VP_11_27_2022_S1_60cm_MT	1	601149	602027	879	1990488	0.571546	arCOG06575	-	DpmII-like_restriction_endonuclease	V	-	-	-	-
SRVP_Atabeya-1-FCNFGDKI_06390	SRVP_Atabeya-1_639 # 604000 # 604704 # 1 # ID=1_639;partial=00;start_type=TTG;rbs_motif=GGAG/GAGG;rbs_spacer=5-10bp;gc_cont=0.462	SRVP_Atabeya-1_639	SR-VP_11_27_2022_S1_100cm_MT	1	604000	604704	705	11625022	0.122016	arCOG00724	-	Transcriptional_regulator,_PadR_family	K	COG3600	Uncharacterized_phage-associated_protein,_contains_DUF4065_domain	X	-
SRVP_Atabeya-1-FCNFGDKI_06410	SRVP_Atabeya-1_641 # 605055 # 606536 # -1 # ID=1_641;partial=00;start_type=ATG;rbs_motif=AGGAG;rbs_spacer=5-10bp;gc_cont=0.518	SRVP_Atabeya-1_641	SR-VP_11_27_2022_S1_100cm_MT	1	605055	606536	1482	11625022	0.0580441	arCOG00865	NtpB	Archaeal/vacuolar-type_H+-ATPase_subunit_B	C	COG1156	Archaeal/vacuolar-type_H+-ATPase_subunit_B/Vma2	C	A/V-type_ATP_synthase
SRVP_Atabeya-1-FCNFGDKI_06420	SRVP_Atabeya-1_642 # 606735 # 610469 # -1 # ID=1_642;partial=00;start_type=ATG;rbs_motif=None;rbs_spacer=None;gc_cont=0.513	SRVP_Atabeya-1_642	SR-VP_11_27_2022_S1_100cm_MT	5	606735	610469	3735	11625022	0.115156	arCOG00286	-	HerA_helicase	L	COG3451	Type_IV_secretory_pathway,_VirB4_component	U	-
SRVP_Atabeya-1-FCNFGDKI_06480	SRVP_Atabeya-1_648 # 616752 # 617099 # -1 # ID=1_648;partial=00;start_type=TTG;rbs_motif=None;rbs_spacer=None;gc_cont=0.466	SRVP_Atabeya-1_648	SR-VP_07_25_2022_A4_70cm_MT	1	616752	617099	348	19546	147.015	-	-	-	-	COG3577	Predicted_aspartyl_protease	R	-
SRVP_Atabeya-1-FCNFGDKI_06490	SRVP_Atabeya-1_649 # 617201 # 617491 # -1 # ID=1_649;partial=00;start_type=ATG;rbs_motif=AGxAGG/AGGxGG;rbs_spacer=5-10bp;gc_cont=0.402	SRVP_Atabeya-1_649	SR-VP_11_27_2022_S1_100cm_MT	1	617201	617491	291	11625022	0.295606	-	-	-	-	-	-	-	-
SRVP_Atabeya-1-FCNFGDKI_06550	SRVP_Atabeya-1_655 # 620039 # 621031 # 1 # ID=1_655;partial=00;start_type=ATG;rbs_motif=AGGA/GGAG/GAGG;rbs_spacer=11-12bp;gc_cont=0.510	SRVP_Atabeya-1_655	SR-VP_11_27_2022_S1_100cm_MT	9	620039	621031	993	11625022	0.77965	arCOG00415	RadA	RecA/RadA_recombinase,_contains_N-terminal_HHH_domain	L	COG0468	RecA/RadA_recombinase	L	-
SRVP_Atabeya-1-FCNFGDKI_06730	SRVP_Atabeya-1_673 # 636553 # 636831 # 1 # ID=1_673;partial=00;start_type=ATG;rbs_motif=GGAG/GAGG;rbs_spacer=5-10bp;gc_cont=0.480	SRVP_Atabeya-1_673	SR-VP_11_27_2022_S1_100cm_MT	3	636553	636831	279	11625022	0.924961	arCOG04308	-	Uncharacterized_protein	S	COG1698	Uncharacterized_conserved_protein,_UPF0147_family	S	-
SRVP_Atabeya-1-FCNFGDKI_06850	SRVP_Atabeya-1_685 # 647117 # 647998 # -1 # ID=1_685;partial=00;start_type=ATG;rbs_motif=AGGA/GGAG/GAGG;rbs_spacer=11-12bp;gc_cont=0.527	SRVP_Atabeya-1_685	SR-VP_07_25_2022_A1_70cm_MT	1	647117	647998	882	125142	9.06	arCOG01601	PorB	Pyruvate:ferredoxin_oxidoreductase_or_related_2-oxoacid:ferredoxin_oxidoreductase,_beta_subunit	C	COG1013	Pyruvate:ferredoxin_oxidoreductase_or_related_2-oxoacid:ferredoxin_oxidoreductase,_beta_subunit	C	Pyruvate_oxidation
SRVP_Atabeya-1-FCNFGDKI_06880	SRVP_Atabeya-1_688 # 649521 # 650096 # -1 # ID=1_688;partial=00;start_type=ATG;rbs_motif=GGAG/GAGG;rbs_spacer=5-10bp;gc_cont=0.521	SRVP_Atabeya-1_688	SR-VP_11_27_2022_S1_100cm_MT	1	649521	650096	576	11625022	0.149343	arCOG01603	PorG	Pyruvate:ferredoxin_oxidoreductase_or_related_2-oxoacid:ferredoxin_oxidoreductase,_gamma_subunit	C	COG1014	Pyruvate:ferredoxin_oxidoreductase_or_related_2-oxoacid:ferredoxin_oxidoreductase,_gamma_subunit	C	Pyruvate_oxidation
SRVP_Atabeya-1-FCNFGDKI_06950	SRVP_Atabeya-1_695 # 654216 # 655205 # 1 # ID=1_695;partial=00;start_type=ATG;rbs_motif=GGAG/GAGG;rbs_spacer=5-10bp;gc_cont=0.514	SRVP_Atabeya-1_695	SR-VP_11_27_2022_S1_100cm_MT	1	654216	655205	990	11625022	0.0868902	arCOG00070	GlyA	Glycine/serine_hydroxymethyltransferase	E	COG0112	Glycine/serine_hydroxymethyltransferase	E	Serine_biosynthesis
SRVP_Atabeya-1-FCNFGDKI_07000	SRVP_Atabeya-1_700 # 664774 # 665796 # -1 # ID=1_700;partial=00;start_type=ATG;rbs_motif=AGxAG;rbs_spacer=5-10bp;gc_cont=0.475	SRVP_Atabeya-1_700	SR-VP_11_27_2022_S1_100cm_MT	1	664774	665796	1023	11625022	0.0840873	arCOG01981	SUA7	Transcription_initiation_factor_TFIIB,_Brf1_subunit/Transcription_initiation_factor_TFIIB	K	COG1405	Transcription_initiation_factor_TFIIIB,_Brf1_subunit/Transcription_initiation_factor_TFIIB	K	-
SRVP_Atabeya-1-FCNFGDKI_07050	SRVP_Atabeya-1_705 # 668532 # 669536 # -1 # ID=1_705;partial=00;start_type=TTG;rbs_motif=AGGAGG;rbs_spacer=5-10bp;gc_cont=0.511	SRVP_Atabeya-1_705	SR-VP_11_27_2022_S1_100cm_MT	1	668532	669536	1005	11625022	0.0855934	arCOG04070	RplC	Ribosomal_protein_L3	J	COG0087	Ribosomal_protein_L3	J	Ribosome_50S_subunit
SRVP_Atabeya-1-FCNFGDKI_07070	SRVP_Atabeya-1_707 # 670630 # 671595 # -1 # ID=1_707;partial=00;start_type=ATG;rbs_motif=AGGAG/GGAGG;rbs_spacer=11-12bp;gc_cont=0.509	SRVP_Atabeya-1_707	SR-VP_11_27_2022_S1_100cm_MT	2	670630	671595	966	11625022	0.178098	-	-	-	-	COG3225	ABC-type_uncharacterized_transport_system_involved_in_gliding_motility,_auxiliary_component	N	-
SRVP_Atabeya-1-FCNFGDKI_07140	SRVP_Atabeya-1_714 # 676495 # 677280 # -1 # ID=1_714;partial=00;start_type=TTG;rbs_motif=3Base/5BMM;rbs_spacer=13-15bp;gc_cont=0.463	SRVP_Atabeya-1_714	SR-VP_11_27_2022_S1_100cm_MT	4	676495	677280	786	11625022	0.437768	arCOG01304	NucS	RecB_family_endonuclease_acting_on_branched_DNA_substrates	L	COG1637	Endonuclease_NucS,_RecB_family	L	-
SRVP_Atabeya-1-FCNFGDKI_07140	SRVP_Atabeya-1_714 # 676495 # 677280 # -1 # ID=1_714;partial=00;start_type=TTG;rbs_motif=3Base/5BMM;rbs_spacer=13-15bp;gc_cont=0.463	SRVP_Atabeya-1_714	SR-VP_11_27_2022_S2_40cm_MT	3	676495	677280	786	4025082	0.948252	arCOG01304	NucS	RecB_family_endonuclease_acting_on_branched_DNA_substrates	L	COG1637	Endonuclease_NucS,_RecB_family	L	-
SRVP_Atabeya-1-FCNFGDKI_07140	SRVP_Atabeya-1_714 # 676495 # 677280 # -1 # ID=1_714;partial=00;start_type=TTG;rbs_motif=3Base/5BMM;rbs_spacer=13-15bp;gc_cont=0.463	SRVP_Atabeya-1_714	SR-VP_11_27_2022_S1_80cm_MT	3	676495	677280	786	4000856	0.953994	arCOG01304	NucS	RecB_family_endonuclease_acting_on_branched_DNA_substrates	L	COG1637	Endonuclease_NucS,_RecB_family	L	-
SRVP_Atabeya-1-FCNFGDKI_07140	SRVP_Atabeya-1_714 # 676495 # 677280 # -1 # ID=1_714;partial=00;start_type=TTG;rbs_motif=3Base/5BMM;rbs_spacer=13-15bp;gc_cont=0.463	SRVP_Atabeya-1_714	SR-VP_11_27_2022_S1_40cm_MT	2	676495	677280	786	1473124	1.7273	arCOG01304	NucS	RecB_family_endonuclease_acting_on_branched_DNA_substrates	L	COG1637	Endonuclease_NucS,_RecB_family	L	-
SRVP_Atabeya-1-FCNFGDKI_07140	SRVP_Atabeya-1_714 # 676495 # 677280 # -1 # ID=1_714;partial=00;start_type=TTG;rbs_motif=3Base/5BMM;rbs_spacer=13-15bp;gc_cont=0.463	SRVP_Atabeya-1_714	SR-VP_11_27_2022_S1_60cm_MT	1	676495	677280	786	1990488	0.639172	arCOG01304	NucS	RecB_family_endonuclease_acting_on_branched_DNA_substrates	L	COG1637	Endonuclease_NucS,_RecB_family	L	-
SRVP_Atabeya-1-FCNFGDKI_07240	SRVP_Atabeya-1_724 # 686260 # 688263 # 1 # ID=1_724;partial=00;start_type=TTG;rbs_motif=GGxGG;rbs_spacer=11-12bp;gc_cont=0.467	SRVP_Atabeya-1_724	SR-VP_11_27_2022_S2_40cm_MT	1	686260	688263	2004	4025082	0.123973	arCOG01695	-	Predicted_component_of_the_ribosome_quality_control_(RQC)_complex,_YloA/Tae2_family,_contains_fibronectin-binding_(FbpA)_and_DUF814_domains	J	COG1293	Ribosome_quality_control_(RQC)_protein_RqcH,_Rqc2/NEMF/Tae2_family,_contains_fibronectin-(FbpA)_and_RNA-_(NFACT)_binding_domains	JO	-
SRVP_Atabeya-1-FCNFGDKI_07340	SRVP_Atabeya-1_734 # 696172 # 697062 # -1 # ID=1_734;partial=00;start_type=ATG;rbs_motif=GGA/GAG/AGG;rbs_spacer=5-10bp;gc_cont=0.496	SRVP_Atabeya-1_734	SR-VP_11_27_2022_S1_100cm_MT	2	696172	697062	891	11625022	0.193089	arCOG02245	-	Cytidylyltransferase_family_enzyme	I	COG1836	Cytidylyltransferase_family_enzyme	R	-
SRVP_Atabeya-1-FCNFGDKI_07360	SRVP_Atabeya-1_736 # 698426 # 699445 # -1 # ID=1_736;partial=00;start_type=TTG;rbs_motif=GGAG/GAGG;rbs_spacer=5-10bp;gc_cont=0.493	SRVP_Atabeya-1_736	SR-VP_11_27_2022_S1_100cm_MT	27	698426	699445	1020	11625022	2.27704	arCOG00042	TilS	tRNA(Ile)-lysidine_synthase_TilS/MesJ	J	COG0037	tRNA(Ile)-lysidine_synthase_TilS/MesJ	J	tRNA_modification
SRVP_Atabeya-1-FCNFGDKI_07440	SRVP_Atabeya-1_744 # 705998 # 707044 # 1 # ID=1_744;partial=00;start_type=ATG;rbs_motif=AGGA/GGAG/GAGG;rbs_spacer=11-12bp;gc_cont=0.495	SRVP_Atabeya-1_744	SR-VP_11_27_2022_S1_100cm_MT	4	705998	707044	1047	11625022	0.328639	arCOG00047	Trm11	tRNA_G10__N-methylase_Trm11	J	COG1041	tRNA_G10_N-methylase_Trm11	J	tRNA_modification
SRVP_Atabeya-1-FCNFGDKI_07450	SRVP_Atabeya-1_745 # 707056 # 707982 # -1 # ID=1_745;partial=00;start_type=TTG;rbs_motif=GGAG/GAGG;rbs_spacer=5-10bp;gc_cont=0.488	SRVP_Atabeya-1_745	SR-VP_11_27_2022_S1_100cm_MT	1	707056	707982	927	11625022	0.0927954	arCOG00501	Rnz	Ribonuclease_Z,__beta-lactamase_superfamily_hydrolase	J	COG1234	Ribonuclease_BN,_tRNA_processing_enzyme	J	-
SRVP_Atabeya-1-FCNFGDKI_07480	SRVP_Atabeya-1_748 # 709037 # 710167 # -1 # ID=1_748;partial=00;start_type=ATG;rbs_motif=GGAGG;rbs_spacer=5-10bp;gc_cont=0.495	SRVP_Atabeya-1_748	SR-VP_11_27_2022_S1_100cm_MT	4	709037	710167	1131	11625022	0.304231	arCOG04163	-	Predicted_ATPase_(AAA+_superfamily)	R	COG1223	Predicted_ATPase,_AAA+_superfamily	R	-
SRVP_Atabeya-1-FCNFGDKI_07510	SRVP_Atabeya-1_751 # 712421 # 713590 # -1 # ID=1_751;partial=00;start_type=TTG;rbs_motif=GGAGG;rbs_spacer=5-10bp;gc_cont=0.500	SRVP_Atabeya-1_751	SR-VP_11_27_2022_S1_100cm_MT	2	712421	713590	1170	11625022	0.147045	arCOG02447	-	Uncharacterized_protein	S	COG2006	Uncharacterized_conserved_protein,_DUF362_family	S	-
SRVP_Atabeya-1-FCNFGDKI_07570	SRVP_Atabeya-1_757 # 722676 # 727928 # -1 # ID=1_757;partial=00;start_type=ATG;rbs_motif=GGA/GAG/AGG;rbs_spacer=5-10bp;gc_cont=0.508	SRVP_Atabeya-1_757	SR-VP_11_27_2022_S1_100cm_MT	14	722676	727928	5253	11625022	0.229259	arCOG00439	MCM2	ATPase_involved_in_replication_control,_Cdc46/Mcm_family	L	COG1241	DNA_replicative_helicase_MCM_subunit_Mcm2,_Cdc46/Mcm_family	L	-
SRVP_Atabeya-1-FCNFGDKI_07680	SRVP_Atabeya-1_768 # 735077 # 735655 # -1 # ID=1_768;partial=00;start_type=GTG;rbs_motif=AGxAGG/AGGxGG;rbs_spacer=5-10bp;gc_cont=0.489	SRVP_Atabeya-1_768	SR-VP_11_27_2022_S1_100cm_MT	6	735077	735655	579	11625022	0.891413	arCOG00362	Srp102	Signal_recognition_particle_receptor_subunit_beta,_a_GTPase	U	COG2229	Signal_recognition_particle_receptor_subunit_beta,_a_GTPase	U	-
SRVP_Atabeya-1-FCNFGDKI_07690	SRVP_Atabeya-1_769 # 735682 # 736149 # -1 # ID=1_769;partial=00;start_type=ATG;rbs_motif=GGAGG;rbs_spacer=5-10bp;gc_cont=0.464	SRVP_Atabeya-1_769	SR-VP_11_27_2022_S1_100cm_MT	9	735682	736149	468	11625022	1.65426	arCOG02603	-	Roadblock/LC7_domain	R	COG2018	Predicted_regulator_of_Ras-like_GTPase_activity,_Roadblock/LC7/MglB_family	T	-
SRVP_Atabeya-1-FCNFGDKI_07760	SRVP_Atabeya-1_776 # 741321 # 742271 # 1 # ID=1_776;partial=00;start_type=TTG;rbs_motif=AGGAGG;rbs_spacer=5-10bp;gc_cont=0.482	SRVP_Atabeya-1_776	SR-VP_11_27_2022_S1_80cm_MT	1	741321	742271	951	4000856	0.262825	arCOG01981	SUA7	Transcription_initiation_factor_TFIIB,_Brf1_subunit/Transcription_initiation_factor_TFIIB	K	COG1405	Transcription_initiation_factor_TFIIIB,_Brf1_subunit/Transcription_initiation_factor_TFIIB	K	-
SRVP_Atabeya-1-FCNFGDKI_07760	SRVP_Atabeya-1_776 # 741321 # 742271 # 1 # ID=1_776;partial=00;start_type=TTG;rbs_motif=AGGAGG;rbs_spacer=5-10bp;gc_cont=0.482	SRVP_Atabeya-1_776	SR-VP_11_27_2022_S1_100cm_MT	1	741321	742271	951	11625022	0.0904536	arCOG01981	SUA7	Transcription_initiation_factor_TFIIB,_Brf1_subunit/Transcription_initiation_factor_TFIIB	K	COG1405	Transcription_initiation_factor_TFIIIB,_Brf1_subunit/Transcription_initiation_factor_TFIIB	K	-
SRVP_Atabeya-1-FCNFGDKI_07880	SRVP_Atabeya-1_788 # 754390 # 754914 # 1 # ID=1_788;partial=00;start_type=ATG;rbs_motif=GGA/GAG/AGG;rbs_spacer=5-10bp;gc_cont=0.493	SRVP_Atabeya-1_788	SR-VP_11_27_2022_S1_40cm_MT	1	754390	754914	525	1473124	1.29301	arCOG00214	MoaB	Molybdopterin_biosynthesis_enzyme	H	COG0521	Molybdopterin_biosynthesis_enzyme_MoaB/MogA	H	Molybdopterin_biosynthesis
SRVP_Atabeya-1-FCNFGDKI_07900	SRVP_Atabeya-1_790 # 756230 # 757525 # 1 # ID=1_790;partial=00;start_type=GTG;rbs_motif=AGGAG;rbs_spacer=5-10bp;gc_cont=0.498	SRVP_Atabeya-1_790	SR-VP_11_27_2022_S1_40cm_MT	1	756230	757525	1296	1473124	0.523788	arCOG00217	MoeA	Molybdopterin_biosynthesis_enzyme	H	COG0303	Molybdopterin_Mo-transferase_(molybdopterin_biosynthesis)	H	Molybdopterin_biosynthesis
SRVP_Atabeya-1-FCNFGDKI_07950	SRVP_Atabeya-1_795 # 761502 # 762992 # -1 # ID=1_795;partial=00;start_type=ATG;rbs_motif=GGA/GAG/AGG;rbs_spacer=5-10bp;gc_cont=0.500	SRVP_Atabeya-1_795	SR-VP_11_27_2022_S1_100cm_MT	1	761502	762992	1491	11625022	0.0576937	arCOG01252	PutA	Lactaldehyde_dehydrogenase,_Succinate_semialdehyde_dehydrogenase,_a-ketoglutarate_semialdehyde_dehydrogenase_or_other_NAD-dependent_aldehyde_dehydrogenase	C	COG1012	Acyl-CoA_reductase_or_other_NAD-dependent_aldehyde_dehydrogenase	I	Proline_degradation
SRVP_Atabeya-1-FCNFGDKI_07990	SRVP_Atabeya-1_799 # 767390 # 767788 # -1 # ID=1_799;partial=00;start_type=ATG;rbs_motif=AGGAGG;rbs_spacer=11-12bp;gc_cont=0.519	SRVP_Atabeya-1_799	SR-VP_11_27_2022_S1_100cm_MT	13	767390	767788	399	11625022	2.8027	arCOG01843	-	Sterol_carrier_protein	I	COG3255	Putative_sterol_carrier_protein,_contains_SCP2_domain	I	-
SRVP_Atabeya-1-FCNFGDKI_08030	SRVP_Atabeya-1_803 # 771732 # 772478 # 1 # ID=1_803;partial=00;start_type=GTG;rbs_motif=GGA/GAG/AGG;rbs_spacer=5-10bp;gc_cont=0.490	SRVP_Atabeya-1_803	SR-VP_11_27_2022_S1_100cm_MT	4	771732	772478	747	11625022	0.460623	arCOG04060	-	Predicted_transcriptional_regulator	K	COG1709	Predicted_transcriptional_regulator,contains_XRE-type_HTH_domain	K	-
SRVP_Atabeya-1-FCNFGDKI_08040	SRVP_Atabeya-1_804 # 772504 # 773058 # -1 # ID=1_804;partial=00;start_type=TTG;rbs_motif=GGxGG;rbs_spacer=5-10bp;gc_cont=0.510	SRVP_Atabeya-1_804	SR-VP_11_27_2022_S1_100cm_MT	3	772504	773058	555	11625022	0.46498	arCOG01858	-	Predicted_HD_superfamily_hydrolase	R	COG1418	HD_superfamily_phosphodieaserase,_includes_HD_domain_of_RNase_Y	JR	-
SRVP_Atabeya-1-FCNFGDKI_08070	SRVP_Atabeya-1_807 # 776655 # 778361 # 1 # ID=1_807;partial=00;start_type=ATG;rbs_motif=GGA/GAG/AGG;rbs_spacer=5-10bp;gc_cont=0.498	SRVP_Atabeya-1_807	SR-VP_11_27_2022_S1_100cm_MT	8	776655	778361	1707	11625022	0.403146	arCOG00063	PyrG	CTP_synthase_(UTP-ammonia_lyase)	F	COG0504	CTP_synthase_(UTP-ammonia_lyase)	F	Pyrimidine_biosynthesis
SRVP_Atabeya-1-FCNFGDKI_08090	SRVP_Atabeya-1_809 # 779588 # 781102 # 1 # ID=1_809;partial=00;start_type=ATG;rbs_motif=GGA/GAG/AGG;rbs_spacer=11-12bp;gc_cont=0.510	SRVP_Atabeya-1_809	SR-VP_11_27_2022_S1_100cm_MT	1	779588	781102	1515	11625022	0.0567798	arCOG00280	-	HerA_helicase	L	COG0433	Archaeal_DNA_helicase_HerA_or_a_related_bacterial_ATPase,_contains_HAS-barrel_and_ATPase_domains	L	-
SRVP_Atabeya-1-FCNFGDKI_08100	SRVP_Atabeya-1_810 # 781109 # 781384 # -1 # ID=1_810;partial=00;start_type=ATG;rbs_motif=GGA/GAG/AGG;rbs_spacer=5-10bp;gc_cont=0.511	SRVP_Atabeya-1_810	SR-VP_11_27_2022_S1_100cm_MT	1	781109	781384	276	11625022	0.311672	arCOG01679	ArsR	Transcriptional_regulator_containing_HTH_domain,_ArsR_family	K	COG4189	Predicted_transcriptional_regulator,_ArsR_family	K	-
SRVP_Atabeya-1-FCNFGDKI_08130	SRVP_Atabeya-1_813 # 782849 # 783334 # 1 # ID=1_813;partial=00;start_type=ATG;rbs_motif=3Base/5BMM;rbs_spacer=13-15bp;gc_cont=0.449	SRVP_Atabeya-1_813	SR-VP_11_27_2022_S1_100cm_MT	23	782849	783334	486	11625022	4.07097	-	-	-	-	-	-	-	-
SRVP_Atabeya-1-FCNFGDKI_08170	SRVP_Atabeya-1_817 # 787195 # 788757 # -1 # ID=1_817;partial=00;start_type=ATG;rbs_motif=AGGAG;rbs_spacer=5-10bp;gc_cont=0.504	SRVP_Atabeya-1_817	SR-VP_11_27_2022_S1_100cm_MT	14	787195	788757	1563	11625022	0.770505	arCOG00410	PheS	Phenylalanyl-tRNA_synthetase_alpha_subunit	J	COG0016	Phenylalanyl-tRNA_synthetase_alpha_subunit	J	Aminoacyl-tRNA_synthetases
SRVP_Atabeya-1-FCNFGDKI_08360	SRVP_Atabeya-1_836 # 807156 # 807962 # -1 # ID=1_836;partial=00;start_type=TTG;rbs_motif=GGA/GAG/AGG;rbs_spacer=5-10bp;gc_cont=0.538	SRVP_Atabeya-1_836	SR-VP_11_27_2022_S1_100cm_MT	1	807156	807962	807	11625022	0.106594	-	-	-	-	COG1580	Flagellar_basal_body-associated_protein_FliL	N	-
SRVP_Atabeya-1-FCNFGDKI_08440	SRVP_Atabeya-1_844 # 816460 # 816738 # 1 # ID=1_844;partial=00;start_type=GTG;rbs_motif=AGxAGG/AGGxGG;rbs_spacer=5-10bp;gc_cont=0.505	SRVP_Atabeya-1_844	SR-VP_11_27_2022_S1_100cm_MT	1	816460	816738	279	11625022	0.30832	arCOG04304	-	Ribosomal_protein_L35AE/L33A	J	COG2451	Ribosomal_protein_L35AE/L33A	J	Archaeal_ribosomal_proteins
SRVP_Atabeya-1-FCNFGDKI_08570	SRVP_Atabeya-1_857 # 829976 # 831469 # -1 # ID=1_857;partial=00;start_type=ATG;rbs_motif=GGAGG;rbs_spacer=5-10bp;gc_cont=0.517	SRVP_Atabeya-1_857	SR-VP_11_27_2022_S1_100cm_MT	1	829976	831469	1494	11625022	0.0575779	arCOG00337	GlcD	FAD/FMN-containing_dehydrogenase	C	COG0277	FAD/FMN-containing_lactate_dehydrogenase/glycolate_oxidase	C	-
SRVP_Atabeya-1-FCNFGDKI_08660	SRVP_Atabeya-1_866 # 836769 # 837461 # -1 # ID=1_866;partial=00;start_type=ATG;rbs_motif=AGGAGG;rbs_spacer=5-10bp;gc_cont=0.473	SRVP_Atabeya-1_866	SR-VP_11_27_2022_S1_100cm_MT	1	836769	837461	693	11625022	0.124129	arCOG00922	SalX	ABC-type_antimicrobial_peptide_transport_system,_ATPase_component	V	COG1136	ABC-type_lipoprotein_export_system,_ATPase_component	M	-
SRVP_Atabeya-1-FCNFGDKI_08670	SRVP_Atabeya-1_867 # 837480 # 838022 # -1 # ID=1_867;partial=00;start_type=ATG;rbs_motif=AGGAGG;rbs_spacer=11-12bp;gc_cont=0.444	SRVP_Atabeya-1_867	SR-VP_11_27_2022_S1_100cm_MT	3	837480	838022	543	11625022	0.475256	arCOG02312	SalY	ABC-type_antimicrobial_peptide_transport_system,_permease_component	V	COG4591	ABC-type_transport_system_involved_in_lipoprotein_release,_permease_component_LolC	M	-
SRVP_Atabeya-1-FCNFGDKI_08710	SRVP_Atabeya-1_871 # 840480 # 842390 # 1 # ID=1_871;partial=00;start_type=TTG;rbs_motif=GGAGG;rbs_spacer=5-10bp;gc_cont=0.507	SRVP_Atabeya-1_871	SR-VP_11_27_2022_S1_40cm_MT	3	840480	842390	1911	1473124	1.06567	arCOG01609	-	Indolepyruvate_ferredoxin_oxidoreductase,_alpha_and_beta_subunit	C	COG0674	Pyruvate:ferredoxin_oxidoreductase_or_related_2-oxoacid:ferredoxin_oxidoreductase,_alpha_subunit	C	Pyruvate_oxidation
SRVP_Atabeya-1-FCNFGDKI_08710	SRVP_Atabeya-1_871 # 840480 # 842390 # 1 # ID=1_871;partial=00;start_type=TTG;rbs_motif=GGAGG;rbs_spacer=5-10bp;gc_cont=0.507	SRVP_Atabeya-1_871	SR-VP_11_27_2022_S2_40cm_MT	1	840480	842390	1911	4025082	0.130006	arCOG01609	-	Indolepyruvate_ferredoxin_oxidoreductase,_alpha_and_beta_subunit	C	COG0674	Pyruvate:ferredoxin_oxidoreductase_or_related_2-oxoacid:ferredoxin_oxidoreductase,_alpha_subunit	C	Pyruvate_oxidation
SRVP_Atabeya-1-FCNFGDKI_08710	SRVP_Atabeya-1_871 # 840480 # 842390 # 1 # ID=1_871;partial=00;start_type=TTG;rbs_motif=GGAGG;rbs_spacer=5-10bp;gc_cont=0.507	SRVP_Atabeya-1_871	SR-VP_11_27_2022_S1_100cm_MT	1	840480	842390	1911	11625022	0.0450138	arCOG01609	-	Indolepyruvate_ferredoxin_oxidoreductase,_alpha_and_beta_subunit	C	COG0674	Pyruvate:ferredoxin_oxidoreductase_or_related_2-oxoacid:ferredoxin_oxidoreductase,_alpha_subunit	C	Pyruvate_oxidation
SRVP_Atabeya-1-FCNFGDKI_08810	SRVP_Atabeya-1_881 # 849348 # 850604 # 1 # ID=1_881;partial=00;start_type=TTG;rbs_motif=AGxAGG/AGGxGG;rbs_spacer=5-10bp;gc_cont=0.503	SRVP_Atabeya-1_881	SR-VP_11_27_2022_S1_100cm_MT	5	849348	850604	1257	11625022	0.342169	arCOG02046	-	Nickel-dependent_lactate_racemase	C	COG3875	Nickel-dependent_lactate_racemase	M	-
SRVP_Atabeya-1-FCNFGDKI_08890	SRVP_Atabeya-1_889 # 857251 # 858585 # -1 # ID=1_889;partial=00;start_type=ATG;rbs_motif=GGA/GAG/AGG;rbs_spacer=5-10bp;gc_cont=0.513	SRVP_Atabeya-1_889	SR-VP_11_27_2022_S1_100cm_MT	4	857251	858585	1335	11625022	0.257742	arCOG02236	HdrA	Heterodisulfide_reductase,_subunit_A_or_related_polyferredoxin	C	COG2221	Dissimilatory_sulfite_reductase_(desulfoviridin),_alpha_and_beta_subunits	P	-
SRVP_Atabeya-1-FCNFGDKI_08900	SRVP_Atabeya-1_890 # 858601 # 859086 # -1 # ID=1_890;partial=00;start_type=GTG;rbs_motif=None;rbs_spacer=None;gc_cont=0.508	SRVP_Atabeya-1_890	SR-VP_11_27_2022_S1_100cm_MT	3	858601	859086	486	11625022	0.530996	arCOG02476	HdrA	Heterodisulfide_reductase,_subunit_A;_ferredoxin_domain	C	COG1233	Phytoene_dehydrogenase-related_protein	Q	-
SRVP_Atabeya-1-FCNFGDKI_08960	SRVP_Atabeya-1_896 # 863017 # 863868 # 1 # ID=1_896;partial=00;start_type=ATG;rbs_motif=AGGAGG;rbs_spacer=11-12bp;gc_cont=0.507	SRVP_Atabeya-1_896	SR-VP_11_27_2022_S1_100cm_MT	7	863017	863868	852	11625022	0.706748	arCOG04382	Mtd	Coenzyme_F420-dependent_N(5),N(10)-methenyltetrahydromethanopterin_dehydrogenase	C	COG1927	F420-dependent_methylenetetrahydromethanopterin_dehydrogenase	C	-
SRVP_Atabeya-1-FCNFGDKI_09040	SRVP_Atabeya-1_904 # 871598 # 872146 # 1 # ID=1_904;partial=00;start_type=TTG;rbs_motif=AGGA/GGAG/GAGG;rbs_spacer=11-12bp;gc_cont=0.483	SRVP_Atabeya-1_904	SR-VP_11_27_2022_S1_100cm_MT	2	871598	872146	549	11625022	0.313375	arCOG04408	CdhB	CO_dehydrogenase/acetyl-CoA_synthase_epsilon_subunit	C	COG1880	CO_dehydrogenase/acetyl-CoA_synthase_epsilon_subunit	C	-
SRVP_Atabeya-1-FCNFGDKI_09050	SRVP_Atabeya-1_905 # 872503 # 873918 # 1 # ID=1_905;partial=00;start_type=TTG;rbs_motif=GGA/GAG/AGG;rbs_spacer=5-10bp;gc_cont=0.501	SRVP_Atabeya-1_905	SR-VP_11_27_2022_S1_80cm_MT	2	872503	873918	1416	4000856	0.353032	arCOG04360	CdhC	CO_dehydrogenase/acetyl-CoA_synthase_beta_subunit	C	COG1614	CO_dehydrogenase/acetyl-CoA_synthase_beta_subunit	C	-
SRVP_Atabeya-1-FCNFGDKI_09060	SRVP_Atabeya-1_906 # 873980 # 875182 # 1 # ID=1_906;partial=00;start_type=TTG;rbs_motif=GGAGG;rbs_spacer=5-10bp;gc_cont=0.514	SRVP_Atabeya-1_906	SR-VP_11_27_2022_S1_100cm_MT	1	873980	875182	1203	11625022	0.0715057	arCOG01980	CdhD	CO_dehydrogenase/acetyl-CoA_synthase_delta_subunit_(corrinoid_Fe-S_protein)	C	COG2069	CO_dehydrogenase/acetyl-CoA_synthase_delta_subunit_(corrinoid_Fe-S_protein)	C	-
SRVP_Atabeya-1-FCNFGDKI_09070	SRVP_Atabeya-1_907 # 875207 # 876997 # 1 # ID=1_907;partial=00;start_type=ATG;rbs_motif=AGGAGG;rbs_spacer=11-12bp;gc_cont=0.510	SRVP_Atabeya-1_907	SR-VP_11_27_2022_S1_100cm_MT	2	875207	876997	1791	11625022	0.0960596	arCOG01979	CdhE	CO_dehydrogenase/acetyl-CoA_synthase_gamma_subunit_(corrinoid_Fe-S_protein)	C	COG1456	CO_dehydrogenase/acetyl-CoA_synthase_gamma_subunit_(corrinoid_Fe-S_protein)	C	-
SRVP_Atabeya-1-FCNFGDKI_09150	SRVP_Atabeya-1_915 # 885502 # 886077 # 1 # ID=1_915;partial=00;start_type=ATG;rbs_motif=4Base/6BMM;rbs_spacer=13-15bp;gc_cont=0.507	SRVP_Atabeya-1_915	SR-VP_11_27_2022_S1_100cm_MT	3	885502	886077	576	11625022	0.448028	arCOG00970	PRE1	20S_proteasome,_beta_subunit	O	COG0638	20S_proteasome,_alpha_and_beta_subunits	O	-
SRVP_Atabeya-1-FCNFGDKI_09400	SRVP_Atabeya-1_940 # 909096 # 910352 # -1 # ID=1_940;partial=00;start_type=ATG;rbs_motif=GGA/GAG/AGG;rbs_spacer=5-10bp;gc_cont=0.459	SRVP_Atabeya-1_940	SR-VP_11_27_2022_S1_100cm_MT	2	909096	910352	1257	11625022	0.136868	-	-	-	-	-	-	-	-
SRVP_Atabeya-1-FCNFGDKI_09530	SRVP_Atabeya-1_953 # 923074 # 923547 # -1 # ID=1_953;partial=00;start_type=GTG;rbs_motif=AGGAG;rbs_spacer=5-10bp;gc_cont=0.540	SRVP_Atabeya-1_953	SR-VP_11_27_2022_S1_100cm_MT	5	923074	923547	474	11625022	0.907398	arCOG02475	FrhD	Coenzyme_F420-reducing_hydrogenase,_delta_subunit	C	-	-	-	-
SRVP_Atabeya-1-FCNFGDKI_09570	SRVP_Atabeya-1_957 # 927272 # 928039 # -1 # ID=1_957;partial=00;start_type=TTG;rbs_motif=AGxAGG/AGGxGG;rbs_spacer=5-10bp;gc_cont=0.456	SRVP_Atabeya-1_957	SR-VP_11_27_2022_S1_60cm_MT	1	927272	928039	768	1990488	0.654153	arCOG00587	CooC	CO_dehydrogenase_maturation_factor	O	COG3640	CO_dehydrogenase_nickel-insertion_accessory_protein_CooC1	O	-
SRVP_Atabeya-1-FCNFGDKI_09600	SRVP_Atabeya-1_960 # 929872 # 930552 # 1 # ID=1_960;partial=00;start_type=TTG;rbs_motif=GGxGG;rbs_spacer=11-12bp;gc_cont=0.483	SRVP_Atabeya-1_960	SR-VP_11_27_2022_S1_100cm_MT	1	929872	930552	681	11625022	0.126316	arCOG00922	SalX	ABC-type_antimicrobial_peptide_transport_system,_ATPase_component	V	COG1136	ABC-type_lipoprotein_export_system,_ATPase_component	M	-
SRVP_Atabeya-1-FCNFGDKI_09620	SRVP_Atabeya-1_962 # 932558 # 933925 # 1 # ID=1_962;partial=00;start_type=ATG;rbs_motif=None;rbs_spacer=None;gc_cont=0.492	SRVP_Atabeya-1_962	SR-VP_11_27_2022_S1_100cm_MT	1	932558	933925	1368	11625022	0.0628811	arCOG00547	RnjA	mRNA_degradation_ribonuclease_J1/J2	J	COG0595	mRNA_degradation_ribonuclease_J1/J2	J	-
SRVP_Atabeya-1-FCNFGDKI_09650	SRVP_Atabeya-1_965 # 935797 # 936900 # -1 # ID=1_965;partial=00;start_type=ATG;rbs_motif=AGGAG;rbs_spacer=5-10bp;gc_cont=0.524	SRVP_Atabeya-1_965	SR-VP_11_27_2022_S1_100cm_MT	5	935797	936900	1104	11625022	0.389589	arCOG01707	CaiA	Acyl-CoA_dehydrogenase	I	COG1960	Acyl-CoA_dehydrogenase_related_to_the_alkylation_response_protein_AidB	I	Fatty_acid_biosynthesis
SRVP_Atabeya-1-FCNFGDKI_09710	SRVP_Atabeya-1_971 # 941644 # 941898 # 1 # ID=1_971;partial=00;start_type=ATG;rbs_motif=GGA/GAG/AGG;rbs_spacer=5-10bp;gc_cont=0.478	SRVP_Atabeya-1_971	SR-VP_11_27_2022_S1_100cm_MT	5	941644	941898	255	11625022	1.68669	arCOG04654	NuoJ	NADH_dehydrogenase_subunit_J	C	COG0839	NADH:ubiquinone_oxidoreductase_subunit_6_(chain_J)	C	NADH_dehydrogenase
SRVP_Atabeya-1-FCNFGDKI_09720	SRVP_Atabeya-1_972 # 941895 # 942200 # 1 # ID=1_972;partial=00;start_type=ATG;rbs_motif=GGAG/GAGG;rbs_spacer=5-10bp;gc_cont=0.526	SRVP_Atabeya-1_972	SR-VP_11_27_2022_S1_100cm_MT	2	941895	942200	306	11625022	0.562231	arCOG03077	MnhB	Multisubunit_Na+/H+_antiporter,_MnhB_subunit	P	COG2111	Multisubunit_Na+/H+_antiporter,_MnhB_subunit	P	-
SRVP_Atabeya-1-FCNFGDKI_09760	SRVP_Atabeya-1_976 # 946091 # 947614 # 1 # ID=1_976;partial=00;start_type=ATG;rbs_motif=GGA/GAG/AGG;rbs_spacer=5-10bp;gc_cont=0.508	SRVP_Atabeya-1_976	SR-VP_11_27_2022_S1_100cm_MT	2	946091	947614	1524	11625022	0.112889	arCOG01537	NuoM	NADH:ubiquinone_oxidoreductase_subunit_4_(chain_M)	C	COG0651	Formate_hydrogenlyase_subunit_3/Multisubunit_Na+/H+_antiporter,_MnhD_subunit	CP	-
SRVP_Atabeya-1-FCNFGDKI_09780	SRVP_Atabeya-1_978 # 948206 # 948556 # 1 # ID=1_978;partial=00;start_type=ATG;rbs_motif=GGAG/GAGG;rbs_spacer=5-10bp;gc_cont=0.453	SRVP_Atabeya-1_978	SR-VP_11_27_2022_S1_100cm_MT	1	948206	948556	351	11625022	0.245075	arCOG01753	Ssh10b	Archaeal_DNA-binding_protein_Alba	K	COG1581	DNA/RNA-binding_protein_AlbA/Ssh10b	K	-
SRVP_Atabeya-1-FCNFGDKI_09790	SRVP_Atabeya-1_979 # 948752 # 948916 # 1 # ID=1_979;partial=00;start_type=ATG;rbs_motif=GGAG/GAGG;rbs_spacer=5-10bp;gc_cont=0.406	SRVP_Atabeya-1_979	SR-VP_11_27_2022_S1_100cm_MT	1	948752	948916	165	11625022	0.521341	-	-	-	-	-	-	-	-
SRVP_Atabeya-1-FCNFGDKI_10040	SRVP_Atabeya-1_1004 # 971720 # 972625 # -1 # ID=1_1004;partial=00;start_type=ATG;rbs_motif=3Base/5BMM;rbs_spacer=13-15bp;gc_cont=0.479	SRVP_Atabeya-1_1004	SR-VP_11_27_2022_S1_100cm_MT	5	971720	972625	906	11625022	0.474731	arCOG00067	PrsA	Phosphoribosylpyrophosphate_synthetase	F	COG0462	Phosphoribosylpyrophosphate_synthetase	F	Histidine_biosynthesis,_Purine_biosynthesis
SRVP_Atabeya-1-FCNFGDKI_10080	SRVP_Atabeya-1_1008 # 975646 # 977037 # 1 # ID=1_1008;partial=00;start_type=ATG;rbs_motif=GGAG/GAGG;rbs_spacer=5-10bp;gc_cont=0.492	SRVP_Atabeya-1_1008	SR-VP_11_27_2022_S1_100cm_MT	2	975646	977037	1392	11625022	0.123594	-	-	-	-	COG4412	Bacillopeptidase_F,_M6_metalloprotease_family	O	-
SRVP_Atabeya-1-FCNFGDKI_10100	SRVP_Atabeya-1_1010 # 978671 # 979765 # -1 # ID=1_1010;partial=00;start_type=ATG;rbs_motif=GGAG/GAGG;rbs_spacer=5-10bp;gc_cont=0.488	SRVP_Atabeya-1_1010	SR-VP_11_27_2022_S1_100cm_MT	4	978671	979765	1095	11625022	0.314233	-	-	-	-	-	-	-	-
SRVP_Atabeya-1-FCNFGDKI_10110	SRVP_Atabeya-1_1011 # 980016 # 980303 # -1 # ID=1_1011;partial=00;start_type=ATG;rbs_motif=GGAG/GAGG;rbs_spacer=5-10bp;gc_cont=0.514	SRVP_Atabeya-1_1011	SR-VP_11_27_2022_S1_60cm_MT	1	980016	980303	288	1990488	1.74441	arCOG01327	Pnp	Purine_nucleoside_phosphorylase	F	COG0005	Purine_nucleoside_phosphorylase	F	Purine_salvage
SRVP_Atabeya-1-FCNFGDKI_10160	SRVP_Atabeya-1_1016 # 985104 # 986843 # 1 # ID=1_1016;partial=00;start_type=ATG;rbs_motif=None;rbs_spacer=None;gc_cont=0.486	SRVP_Atabeya-1_1016	SR-VP_11_27_2022_S1_100cm_MT	2	985104	986843	1740	11625022	0.0988751	arCOG01165	-	DNA_topoisomerase_VI,_subunit_B	L	COG1389	DNA_topoisomerase_VI,_subunit_B	L	-
SRVP_Atabeya-1-FCNFGDKI_10190	SRVP_Atabeya-1_1019 # 988736 # 989833 # -1 # ID=1_1019;partial=00;start_type=TTG;rbs_motif=AGGAGG;rbs_spacer=5-10bp;gc_cont=0.480	SRVP_Atabeya-1_1019	SR-VP_11_27_2022_S1_100cm_MT	4	988736	989833	1098	11625022	0.313375	arCOG01331	HtpX	Zn-dependent_protease_with_chaperone_function	O	COG0501	Zn-dependent_protease_with_chaperone_function	O	-
SRVP_Atabeya-1-FCNFGDKI_10240	SRVP_Atabeya-1_1024 # 996535 # 997701 # 1 # ID=1_1024;partial=00;start_type=GTG;rbs_motif=GGA/GAG/AGG;rbs_spacer=5-10bp;gc_cont=0.500	SRVP_Atabeya-1_1024	SR-VP_11_27_2022_S1_40cm_MT	1	996535	997701	1167	1473124	0.581688	arCOG01463	-	ABC-type_multidrug_transport_system,_permease_component	V	COG0842	ABC-type_multidrug_transport_system,_permease_component	V	-
SRVP_Atabeya-1-FCNFGDKI_10270	SRVP_Atabeya-1_1027 # 1000648 # 1000920 # 1 # ID=1_1027;partial=00;start_type=TTG;rbs_motif=GGA/GAG/AGG;rbs_spacer=5-10bp;gc_cont=0.454	SRVP_Atabeya-1_1027	SR-VP_11_27_2022_S1_100cm_MT	2	1000648	1000920	273	11625022	0.630193	arCOG01580	-	DNA-binding_transcriptional_regulator,_Lrp_family	K	COG1522	DNA-binding_transcriptional_regulator,_Lrp_family	K	-
SRVP_Atabeya-1-FCNFGDKI_10310	SRVP_Atabeya-1_1031 # 1003515 # 1003784 # -1 # ID=1_1031;partial=00;start_type=ATG;rbs_motif=GGA/GAG/AGG;rbs_spacer=5-10bp;gc_cont=0.489	SRVP_Atabeya-1_1031	SR-VP_11_27_2022_S1_40cm_MT	1	1003515	1003784	270	1473124	2.51418	arCOG02062	TusA	TusA-related_sulfurtransferase	P	COG0425	Sulfur_carrier_protein_TusA_(tRNA_thiolation,_molybdenum_cofactor_biosynthesis)	JHO	-
SRVP_Atabeya-1-FCNFGDKI_10310	SRVP_Atabeya-1_1031 # 1003515 # 1003784 # -1 # ID=1_1031;partial=00;start_type=ATG;rbs_motif=GGA/GAG/AGG;rbs_spacer=5-10bp;gc_cont=0.489	SRVP_Atabeya-1_1031	SR-VP_11_27_2022_S1_80cm_MT	1	1003515	1003784	270	4000856	0.925728	arCOG02062	TusA	TusA-related_sulfurtransferase	P	COG0425	Sulfur_carrier_protein_TusA_(tRNA_thiolation,_molybdenum_cofactor_biosynthesis)	JHO	-
SRVP_Atabeya-1-FCNFGDKI_10310	SRVP_Atabeya-1_1031 # 1003515 # 1003784 # -1 # ID=1_1031;partial=00;start_type=ATG;rbs_motif=GGA/GAG/AGG;rbs_spacer=5-10bp;gc_cont=0.489	SRVP_Atabeya-1_1031	SR-VP_11_27_2022_S1_100cm_MT	1	1003515	1003784	270	11625022	0.318598	arCOG02062	TusA	TusA-related_sulfurtransferase	P	COG0425	Sulfur_carrier_protein_TusA_(tRNA_thiolation,_molybdenum_cofactor_biosynthesis)	JHO	-
SRVP_Atabeya-1-FCNFGDKI_10330	SRVP_Atabeya-1_1033 # 1004619 # 1006286 # -1 # ID=1_1033;partial=00;start_type=ATG;rbs_motif=AGGAG/GGAGG;rbs_spacer=11-12bp;gc_cont=0.494	SRVP_Atabeya-1_1033	SR-VP_11_27_2022_S1_100cm_MT	18	1004619	1006286	1668	11625022	0.928288	arCOG01257	GroEL	Chaperonin_GroEL,_HSP60_family	O	COG0459	Chaperonin_GroEL_(HSP60_family)	O	-
SRVP_Atabeya-1-FCNFGDKI_10370	SRVP_Atabeya-1_1037 # 1009336 # 1012644 # -1 # ID=1_1037;partial=00;start_type=ATG;rbs_motif=AGGAGG;rbs_spacer=5-10bp;gc_cont=0.490	SRVP_Atabeya-1_1037	SR-VP_11_27_2022_S1_100cm_MT	1	1009336	1012644	3309	11625022	0.0259962	arCOG01594	CarB	Carbamoylphosphate_synthase_large_subunit	E	COG0137	Argininosuccinate_synthase	E	Arginine_biosynthesis
SRVP_Atabeya-1-FCNFGDKI_10490	SRVP_Atabeya-1_1049 # 1025316 # 1026767 # 1 # ID=1_1049;partial=00;start_type=TTG;rbs_motif=AGGAGG;rbs_spacer=11-12bp;gc_cont=0.511	SRVP_Atabeya-1_1049	SR-VP_11_27_2022_S1_100cm_MT	2	1025316	1026767	1452	11625022	0.118487	arCOG04246	RtcB	RNA_3-P_ligase,_RtcB_family_protein	J	COG1690	RNA-splicing_ligase_RtcB,_repairs_tRNA_damage	J	-
SRVP_Atabeya-1-FCNFGDKI_10500	SRVP_Atabeya-1_1050 # 1026864 # 1027064 # -1 # ID=1_1050;partial=00;start_type=ATG;rbs_motif=None;rbs_spacer=None;gc_cont=0.438	SRVP_Atabeya-1_1050	SR-VP_11_27_2022_S1_100cm_MT	1	1026864	1027064	201	11625022	0.427967	-	-	-	-	-	-	-	-
SRVP_Atabeya-1-FCNFGDKI_10580	SRVP_Atabeya-1_1058 # 1036444 # 1037064 # 1 # ID=1_1058;partial=00;start_type=TTG;rbs_motif=AGGAG;rbs_spacer=5-10bp;gc_cont=0.494	SRVP_Atabeya-1_1058	SR-VP_11_27_2022_S1_100cm_MT	9	1036444	1037064	621	11625022	1.24669	-	-	-	-	-	-	-	-
SRVP_Atabeya-1-FCNFGDKI_10660	SRVP_Atabeya-1_1066 # 1044333 # 1044665 # 1 # ID=1_1066;partial=00;start_type=ATG;rbs_motif=GGAG/GAGG;rbs_spacer=5-10bp;gc_cont=0.483	SRVP_Atabeya-1_1066	SR-VP_07_25_2022_A4_70cm_MT	1	1044333	1044665	333	19546	153.638	-	-	-	-	COG2018	Predicted_regulator_of_Ras-like_GTPase_activity,_Roadblock/LC7/MglB_family	T	-
SRVP_Atabeya-1-FCNFGDKI_10750	SRVP_Atabeya-1_1075 # 1051246 # 1051815 # -1 # ID=1_1075;partial=00;start_type=TTG;rbs_motif=AGGA/GGAG/GAGG;rbs_spacer=11-12bp;gc_cont=0.526	SRVP_Atabeya-1_1075	SR-VP_11_27_2022_S2_40cm_MT	1	1051246	1051815	570	4025082	0.435863	arCOG07501	SpoIVFB	Zn-dependent_protease	R	-	-	-	-
SRVP_Atabeya-1-FCNFGDKI_10830	SRVP_Atabeya-1_1083 # 1059790 # 1060965 # -1 # ID=1_1083;partial=00;start_type=ATG;rbs_motif=GGxGG;rbs_spacer=5-10bp;gc_cont=0.500	SRVP_Atabeya-1_1083	SR-VP_11_27_2022_S1_100cm_MT	2	1059790	1060965	1176	11625022	0.146295	arCOG00238	ArsB	Na+/H+_antiporter_NhaD_or_related_arsenite_permease	P	COG1055	Na+/H+_antiporter_NhaD_or_related_arsenite_permease	P	-
SRVP_Atabeya-1-FCNFGDKI_10850	SRVP_Atabeya-1_1085 # 1062048 # 1063634 # 1 # ID=1_1085;partial=00;start_type=GTG;rbs_motif=GGAG/GAGG;rbs_spacer=5-10bp;gc_cont=0.526	SRVP_Atabeya-1_1085	SR-VP_11_27_2022_S1_100cm_MT	2	1062048	1063634	1587	11625022	0.108407	arCOG00572	NadB	Aspartate_oxidase	H	COG0029	Aspartate_oxidase	H	NAD_biosynthesis
SRVP_Atabeya-1-FCNFGDKI_10900	SRVP_Atabeya-1_1090 # 1066991 # 1069402 # -1 # ID=1_1090;partial=00;start_type=ATG;rbs_motif=AGxAG;rbs_spacer=5-10bp;gc_cont=0.491	SRVP_Atabeya-1_1090	SR-VP_11_27_2022_S1_100cm_MT	3	1066991	1069402	2412	11625022	0.106992	arCOG03154	-	Intein/homing_endonuclease	L	COG1395	Predicted_transcriptional_regulator	K	-
SRVP_Atabeya-1-FCNFGDKI_10990	SRVP_Atabeya-1_1099 # 1084118 # 1085197 # 1 # ID=1_1099;partial=00;start_type=ATG;rbs_motif=AGGA/GGAG/GAGG;rbs_spacer=11-12bp;gc_cont=0.512	SRVP_Atabeya-1_1099	SR-VP_11_27_2022_S1_100cm_MT	3	1084118	1085197	1080	11625022	0.238948	arCOG04213	INO1	Myo-inositol-1-phosphate_synthase	I	COG1260	Myo-inositol-1-phosphate_synthase	I	-
SRVP_Atabeya-1-FCNFGDKI_11000	SRVP_Atabeya-1_1100 # 1085394 # 1086206 # 1 # ID=1_1100;partial=00;start_type=TTG;rbs_motif=GGAG/GAGG;rbs_spacer=5-10bp;gc_cont=0.490	SRVP_Atabeya-1_1100	SR-VP_11_27_2022_S1_100cm_MT	10	1085394	1086206	813	11625022	1.05807	arCOG10526	-	Membrane_associated_signal_transduction_histidine_kinase	T	-	-	-	-
SRVP_Atabeya-1-FCNFGDKI_11010	SRVP_Atabeya-1_1101 # 1086199 # 1086909 # 1 # ID=1_1101;partial=00;start_type=GTG;rbs_motif=AGGAGG;rbs_spacer=5-10bp;gc_cont=0.470	SRVP_Atabeya-1_1101	SR-VP_11_27_2022_S1_100cm_MT	2	1086199	1086909	711	11625022	0.241973	-	-	-	-	-	-	-	-
SRVP_Atabeya-1-FCNFGDKI_11020	SRVP_Atabeya-1_1102 # 1087034 # 1087387 # -1 # ID=1_1102;partial=00;start_type=ATG;rbs_motif=GGA/GAG/AGG;rbs_spacer=5-10bp;gc_cont=0.486	SRVP_Atabeya-1_1102	SR-VP_11_27_2022_S1_100cm_MT	1	1087034	1087387	354	11625022	0.242998	-	-	-	-	-	-	-	-
SRVP_Atabeya-1-FCNFGDKI_11060	SRVP_Atabeya-1_1106 # 1093466 # 1094680 # 1 # ID=1_1106;partial=00;start_type=ATG;rbs_motif=GGA/GAG/AGG;rbs_spacer=5-10bp;gc_cont=0.491	SRVP_Atabeya-1_1106	SR-VP_11_27_2022_S1_100cm_MT	6	1093466	1094680	1215	11625022	0.424797	arCOG01107	ArgE	Acetylornithine_deacetylase/Succinyl-diaminopimelate_desuccinylase_or_related_deacylase	E	COG0624	Acetylornithine_deacetylase/Succinyl-diaminopimelate_desuccinylase_or_related_deacylase	E	Arginine_biosynthesis
SRVP_Atabeya-1-FCNFGDKI_11070	SRVP_Atabeya-1_1107 # 1094711 # 1095535 # -1 # ID=1_1107;partial=00;start_type=ATG;rbs_motif=AGxAGG/AGGxGG;rbs_spacer=5-10bp;gc_cont=0.479	SRVP_Atabeya-1_1107	SR-VP_11_27_2022_S1_100cm_MT	3	1094711	1095535	825	11625022	0.312805	arCOG00666	GCD1	N-acetylglucosamine-1-phosphate_uridyltransferase	M	COG1208	NDP-sugar_pyrophosphorylase,_includes_eIF-2Bgamma,_eIF-2Bepsilon,_and_LPS_biosynthesis_protein_s	JM	-
SRVP_Atabeya-1-FCNFGDKI_11100	SRVP_Atabeya-1_1110 # 1096460 # 1099345 # -1 # ID=1_1110;partial=00;start_type=TTG;rbs_motif=None;rbs_spacer=None;gc_cont=0.493	SRVP_Atabeya-1_1110	SR-VP_11_27_2022_S1_100cm_MT	2	1096460	1099345	2886	11625022	0.0596129	arCOG02044	AglB	Oligosaccharyltransferase_membrane_subunit	M	COG1287	Asparagine_N-glycosylation_enzyme,_membrane_subunit_Stt3	O	-
SRVP_Atabeya-1-FCNFGDKI_11300	SRVP_Atabeya-1_1130 # 1119999 # 1121675 # 1 # ID=1_1130;partial=00;start_type=TTG;rbs_motif=AGGAGG;rbs_spacer=11-12bp;gc_cont=0.475	SRVP_Atabeya-1_1130	SR-VP_11_27_2022_S1_100cm_MT	1	1119999	1121675	1677	11625022	0.0512948	arCOG00856	CaiC	Acyl-CoA_synthetase_(AMP-forming)/AMP-acid_ligase_II	I	COG0365	Acyl-coenzyme_A_synthetase/AMP-(fatty)_acid_ligase	I	-
SRVP_Atabeya-1-FCNFGDKI_11330	SRVP_Atabeya-1_1133 # 1123477 # 1124520 # -1 # ID=1_1133;partial=00;start_type=ATG;rbs_motif=GGAG/GAGG;rbs_spacer=5-10bp;gc_cont=0.497	SRVP_Atabeya-1_1133	SR-VP_11_27_2022_S1_100cm_MT	2	1123477	1124520	1044	11625022	0.164792	arCOG01767	PksG	3-hydroxy-3-methylglutaryl_CoA_synthase	I	COG3425	3-hydroxy-3-methylglutaryl_CoA_synthase	I	Isoprenoid_biosynthesis
SRVP_Atabeya-1-FCNFGDKI_11440	SRVP_Atabeya-1_1144 # 1136010 # 1136258 # -1 # ID=1_1144;partial=00;start_type=ATG;rbs_motif=AGxAGG/AGGxGG;rbs_spacer=5-10bp;gc_cont=0.498	SRVP_Atabeya-1_1144	SR-VP_11_27_2022_S1_100cm_MT	2	1136010	1136258	249	11625022	0.690934	-	-	-	-	-	-	-	-
SRVP_Atabeya-1-FCNFGDKI_11450	SRVP_Atabeya-1_1145 # 1136273 # 1136566 # -1 # ID=1_1145;partial=00;start_type=ATG;rbs_motif=GGA/GAG/AGG;rbs_spacer=5-10bp;gc_cont=0.459	SRVP_Atabeya-1_1145	SR-VP_11_27_2022_S1_100cm_MT	6	1136273	1136566	294	11625022	1.75554	-	-	-	-	-	-	-	-
SRVP_Atabeya-1-FCNFGDKI_11460	SRVP_Atabeya-1_1146 # 1136591 # 1137286 # -1 # ID=1_1146;partial=00;start_type=TTG;rbs_motif=AGGAG/GGAGG;rbs_spacer=11-12bp;gc_cont=0.504	SRVP_Atabeya-1_1146	SR-VP_11_27_2022_S1_100cm_MT	2	1136591	1137286	696	11625022	0.247188	arCOG00288	NfnB	Nitroreductase	C	COG0778	Nitroreductase	C	Pyrimidine_degradation
SRVP_Atabeya-1-FCNFGDKI_11470	SRVP_Atabeya-1_1147 # 1137903 # 1139762 # -1 # ID=1_1147;partial=00;start_type=ATG;rbs_motif=AGGA/GGAG/GAGG;rbs_spacer=11-12bp;gc_cont=0.502	SRVP_Atabeya-1_1147	SR-VP_11_27_2022_S1_100cm_MT	1	1137903	1139762	1860	11625022	0.046248	arCOG00615	NemA	NADH:flavin_oxidoreductase,_Old_Yellow_Enzyme_family	C	COG1902	2,4-dienoyl-CoA_reductase_or_related_NADH-dependent_reductase,_Old_Yellow_Enzyme_(OYE)_family	C	-
SRVP_Atabeya-1-FCNFGDKI_11480	SRVP_Atabeya-1_1148 # 1139961 # 1140254 # 1 # ID=1_1148;partial=00;start_type=ATG;rbs_motif=GGA/GAG/AGG;rbs_spacer=5-10bp;gc_cont=0.459	SRVP_Atabeya-1_1148	SR-VP_11_27_2022_S1_100cm_MT	2	1139961	1140254	294	11625022	0.585179	-	-	-	-	-	-	-	-
SRVP_Atabeya-1-FCNFGDKI_11540	SRVP_Atabeya-1_1154 # 1144196 # 1144921 # -1 # ID=1_1154;partial=00;start_type=ATG;rbs_motif=GGA/GAG/AGG;rbs_spacer=5-10bp;gc_cont=0.488	SRVP_Atabeya-1_1154	SR-VP_11_27_2022_S1_100cm_MT	1	1144196	1144921	726	11625022	0.118487	arCOG00971	PRE1	20S_proteasome,_alpha_subunit	O	COG0638	20S_proteasome,_alpha_and_beta_subunits	O	-
SRVP_Atabeya-1-FCNFGDKI_11550	SRVP_Atabeya-1_1155 # 1145138 # 1145794 # 1 # ID=1_1155;partial=00;start_type=ATG;rbs_motif=GGA/GAG/AGG;rbs_spacer=5-10bp;gc_cont=0.481	SRVP_Atabeya-1_1155	SR-VP_11_27_2022_S1_100cm_MT	14	1145138	1145794	657	11625022	1.83303	arCOG00040	Hpt1	Hypoxanthine_phosphoribosyltransferase	H	COG2236	Hypoxanthine_phosphoribosyltransferase	H	Purine_salvage
SRVP_Atabeya-1-FCNFGDKI_11590	SRVP_Atabeya-1_1159 # 1148158 # 1148718 # -1 # ID=1_1159;partial=00;start_type=TTG;rbs_motif=GGxGG;rbs_spacer=5-10bp;gc_cont=0.458	SRVP_Atabeya-1_1159	SR-VP_11_27_2022_S1_100cm_MT	3	1148158	1148718	561	11625022	0.460007	-	-	-	-	-	-	-	-
SRVP_Atabeya-1-FCNFGDKI_11660	SRVP_Atabeya-1_1166 # 1154002 # 1154370 # -1 # ID=1_1166;partial=00;start_type=ATG;rbs_motif=3Base/5BMM;rbs_spacer=13-15bp;gc_cont=0.580	SRVP_Atabeya-1_1166	SR-VP_11_27_2022_S1_60cm_MT	1	1154002	1154370	369	1990488	1.36149	arCOG01641	-	Cold_shock_responsive_RNA-binding_protein,_contains_TRAM_domain	O	COG3269	Predicted_RNA-binding_protein,_contains_TRAM_domain	R	-
SRVP_Atabeya-1-FCNFGDKI_11660	SRVP_Atabeya-1_1166 # 1154002 # 1154370 # -1 # ID=1_1166;partial=00;start_type=ATG;rbs_motif=3Base/5BMM;rbs_spacer=13-15bp;gc_cont=0.580	SRVP_Atabeya-1_1166	SR-VP_11_27_2022_S1_100cm_MT	1	1154002	1154370	369	11625022	0.23312	arCOG01641	-	Cold_shock_responsive_RNA-binding_protein,_contains_TRAM_domain	O	COG3269	Predicted_RNA-binding_protein,_contains_TRAM_domain	R	-
SRVP_Atabeya-1-FCNFGDKI_11720	SRVP_Atabeya-1_1172 # 1159700 # 1160494 # 1 # ID=1_1172;partial=00;start_type=TTG;rbs_motif=AGGAGG;rbs_spacer=11-12bp;gc_cont=0.479	SRVP_Atabeya-1_1172	SR-VP_11_27_2022_S1_100cm_MT	1	1159700	1160494	795	11625022	0.108203	arCOG00249	FadB	3-hydroxyacyl-CoA_dehydrogenase,_some_fused_to_Enoyl-CoA_hydratase	I	COG1024	Enoyl-CoA_hydratase/carnithine_racemase	I	Fatty_acid_biosynthesis
SRVP_Atabeya-1-FCNFGDKI_11740	SRVP_Atabeya-1_1174 # 1162043 # 1162552 # -1 # ID=1_1174;partial=00;start_type=TTG;rbs_motif=GGAG/GAGG;rbs_spacer=5-10bp;gc_cont=0.510	SRVP_Atabeya-1_1174	SR-VP_11_27_2022_S1_100cm_MT	6	1162043	1162552	510	11625022	1.01202	arCOG00288	NfnB	Nitroreductase	C	COG0778	Nitroreductase	C	Pyrimidine_degradation
SRVP_Atabeya-1-FCNFGDKI_11750	SRVP_Atabeya-1_1175 # 1162624 # 1163562 # -1 # ID=1_1175;partial=00;start_type=TTG;rbs_motif=GGAGG;rbs_spacer=5-10bp;gc_cont=0.506	SRVP_Atabeya-1_1175	SR-VP_11_27_2022_S1_100cm_MT	4	1162624	1163562	939	11625022	0.366438	arCOG09718	-	Collagenase_family_protease	O	COG0826	23S_rRNA_C2501_and_tRNA_U34_5'-hydroxylation_protein_RlhA/YrrN/YrrO,_U32_peptidase_family	J	23S_rRNA_modification
SRVP_Atabeya-1-FCNFGDKI_11750	SRVP_Atabeya-1_1175 # 1162624 # 1163562 # -1 # ID=1_1175;partial=00;start_type=TTG;rbs_motif=GGAGG;rbs_spacer=5-10bp;gc_cont=0.506	SRVP_Atabeya-1_1175	SR-VP_07_25_2022_A1_70cm_MT	1	1162624	1163562	939	125142	8.51003	arCOG09718	-	Collagenase_family_protease	O	COG0826	23S_rRNA_C2501_and_tRNA_U34_5'-hydroxylation_protein_RlhA/YrrN/YrrO,_U32_peptidase_family	J	23S_rRNA_modification
SRVP_Atabeya-1-FCNFGDKI_11770	SRVP_Atabeya-1_1177 # 1165304 # 1166797 # 1 # ID=1_1177;partial=00;start_type=ATG;rbs_motif=AGGA/GGAG/GAGG;rbs_spacer=11-12bp;gc_cont=0.525	SRVP_Atabeya-1_1177	SR-VP_11_27_2022_S1_100cm_MT	6	1165304	1166797	1494	11625022	0.345467	arCOG04172	DapA	Dihydrodipicolinate_synthase/N-acetylneuraminate_lyase	E	COG0329	4-hydroxy-tetrahydrodipicolinate_synthase/N-acetylneuraminate_lyase	EM	Lysine_biosynthesis
SRVP_Atabeya-1-FCNFGDKI_11780	SRVP_Atabeya-1_1178 # 1166867 # 1167175 # -1 # ID=1_1178;partial=00;start_type=TTG;rbs_motif=AGGAG/GGAGG;rbs_spacer=11-12bp;gc_cont=0.485	SRVP_Atabeya-1_1178	SR-VP_11_27_2022_S1_100cm_MT	2	1166867	1167175	309	11625022	0.556772	arCOG12283	-	Uncharacterized_membrane_protein	S	-	-	-	-
SRVP_Atabeya-1-FCNFGDKI_11800	SRVP_Atabeya-1_1180 # 1168795 # 1170081 # -1 # ID=1_1180;partial=00;start_type=ATG;rbs_motif=AGGA/GGAG/GAGG;rbs_spacer=11-12bp;gc_cont=0.490	SRVP_Atabeya-1_1180	SR-VP_11_27_2022_S1_100cm_MT	1	1168795	1170081	1287	11625022	0.0668387	arCOG01696	ApgM	2,3-bisphosphoglycerate-independent_phosphoglycerate_mutase	G	COG3635	2,3-bisphosphoglycerate-independent_phosphoglycerate_mutase,_archeal_type	G	Glycolysis
SRVP_Atabeya-1-FCNFGDKI_11860	SRVP_Atabeya-1_1186 # 1174831 # 1175724 # -1 # ID=1_1186;partial=00;start_type=ATG;rbs_motif=AGGA/GGAG/GAGG;rbs_spacer=11-12bp;gc_cont=0.485	SRVP_Atabeya-1_1186	SR-VP_11_27_2022_S1_100cm_MT	1	1174831	1175724	894	11625022	0.0962207	arCOG00250	FadB	3-hydroxyacyl-CoA_dehydrogenase	I	COG1250	3-hydroxyacyl-CoA_dehydrogenase	I	Fatty_acid_biosynthesis
SRVP_Atabeya-1-FCNFGDKI_11870	SRVP_Atabeya-1_1187 # 1175914 # 1176711 # -1 # ID=1_1187;partial=00;start_type=ATG;rbs_motif=GGxGG;rbs_spacer=11-12bp;gc_cont=0.474	SRVP_Atabeya-1_1187	SR-VP_11_27_2022_S1_100cm_MT	1	1175914	1176711	798	11625022	0.107796	-	-	-	-	-	-	-	-
SRVP_Atabeya-1-FCNFGDKI_11880	SRVP_Atabeya-1_1188 # 1176826 # 1178175 # -1 # ID=1_1188;partial=00;start_type=TTG;rbs_motif=GGxGG;rbs_spacer=5-10bp;gc_cont=0.602	SRVP_Atabeya-1_1188	SR-VP_11_27_2022_S1_100cm_MT	2	1176826	1178175	1350	11625022	0.127439	arCOG00679	-	Transposable_element,_IS605_OrfB_family,_contains_RNAse_H_fold_nuclease_and_Zn_finger_domains	X	COG0675	Transposase	X	-
SRVP_Atabeya-1-FCNFGDKI_11900	SRVP_Atabeya-1_1190 # 1179549 # 1181012 # 1 # ID=1_1190;partial=00;start_type=ATG;rbs_motif=3Base/5BMM;rbs_spacer=13-15bp;gc_cont=0.493	SRVP_Atabeya-1_1190	SR-VP_11_27_2022_S1_100cm_MT	7	1179549	1181012	1464	11625022	0.411304	arCOG01434	-	Cysteate_synthase	H	COG0498	Threonine_synthase	E	Threonine_biosynthesis
SRVP_Atabeya-1-FCNFGDKI_11900	SRVP_Atabeya-1_1190 # 1179549 # 1181012 # 1 # ID=1_1190;partial=00;start_type=ATG;rbs_motif=3Base/5BMM;rbs_spacer=13-15bp;gc_cont=0.493	SRVP_Atabeya-1_1190	SR-VP_11_27_2022_S1_60cm_MT	1	1179549	1181012	1464	1990488	0.343162	arCOG01434	-	Cysteate_synthase	H	COG0498	Threonine_synthase	E	Threonine_biosynthesis
SRVP_Atabeya-1-FCNFGDKI_12010	SRVP_Atabeya-1_1201 # 1191913 # 1192677 # -1 # ID=1_1201;partial=00;start_type=ATG;rbs_motif=GGA/GAG/AGG;rbs_spacer=5-10bp;gc_cont=0.503	SRVP_Atabeya-1_1201	SR-VP_11_27_2022_S1_100cm_MT	2	1191913	1192677	765	11625022	0.224892	arCOG01648	MhpC	Alpha/beta_superfamily_hydrolase	R	COG0596	2-succinyl-6-hydroxy-2,4-cyclohexadiene-1-carboxylate_synthase_MenH_and_related_esterases,_alpha/beta_hydrolase_fold	HR	Menaquinone_biosynthesis
SRVP_Atabeya-1-FCNFGDKI_12060	SRVP_Atabeya-1_1206 # 1198961 # 1199884 # -1 # ID=1_1206;partial=00;start_type=ATG;rbs_motif=GGA/GAG/AGG;rbs_spacer=5-10bp;gc_cont=0.483	SRVP_Atabeya-1_1206	SR-VP_11_27_2022_S2_40cm_MT	1	1198961	1199884	924	4025082	0.268877	-	-	-	-	-	-	-	-
SRVP_Atabeya-1-FCNFGDKI_12080	SRVP_Atabeya-1_1208 # 1202574 # 1204022 # 1 # ID=1_1208;partial=00;start_type=ATG;rbs_motif=None;rbs_spacer=None;gc_cont=0.485	SRVP_Atabeya-1_1208	SR-VP_11_27_2022_S1_100cm_MT	1	1202574	1204022	1449	11625022	0.059366	arCOG00321	TldD	Zn-dependent_protease,_component_of_TldD/TldE_system	O	COG0312	Zn-dependent_protease_PmbA/TldA_or_its_inactivated_homolog	R	-
SRVP_Atabeya-1-FCNFGDKI_12090	SRVP_Atabeya-1_1209 # 1204019 # 1205359 # 1 # ID=1_1209;partial=00;start_type=GTG;rbs_motif=GGAGG;rbs_spacer=5-10bp;gc_cont=0.504	SRVP_Atabeya-1_1209	SR-VP_11_27_2022_S1_80cm_MT	1	1204019	1205359	1341	4000856	0.186388	arCOG00322	TldE	Inactivated_Zn-dependent_protease,_component_of_TldD/TldE_system	O	COG0312	Zn-dependent_protease_PmbA/TldA_or_its_inactivated_homolog	R	-
SRVP_Atabeya-1-FCNFGDKI_12120	SRVP_Atabeya-1_1212 # 1207782 # 1209203 # -1 # ID=1_1212;partial=00;start_type=TTG;rbs_motif=GGA/GAG/AGG;rbs_spacer=5-10bp;gc_cont=0.513	SRVP_Atabeya-1_1212	SR-VP_11_27_2022_S1_100cm_MT	2	1207782	1209203	1422	11625022	0.120986	arCOG00321	TldD	Zn-dependent_protease,_component_of_TldD/TldE_system	O	COG0312	Zn-dependent_protease_PmbA/TldA_or_its_inactivated_homolog	R	-
SRVP_Atabeya-1-FCNFGDKI_12140	SRVP_Atabeya-1_1214 # 1209929 # 1210306 # 1 # ID=1_1214;partial=00;start_type=ATG;rbs_motif=GGA/GAG/AGG;rbs_spacer=5-10bp;gc_cont=0.489	SRVP_Atabeya-1_1214	SR-VP_11_27_2022_S1_100cm_MT	2	1209929	1210306	378	11625022	0.455139	arCOG02706	GloA	Lactoylglutathione_lyase_or_related_enzyme	E	COG0346	Catechol_2,3-dioxygenase_or_related_enzyme,_vicinal_oxygen_chelate_(VOC)_family	Q	-
SRVP_Atabeya-1-FCNFGDKI_12170	SRVP_Atabeya-1_1217 # 1212501 # 1213064 # 1 # ID=1_1217;partial=00;start_type=ATG;rbs_motif=GGxGG;rbs_spacer=5-10bp;gc_cont=0.489	SRVP_Atabeya-1_1217	SR-VP_11_27_2022_S1_100cm_MT	2	1212501	1213064	564	11625022	0.30504	arCOG00905	-	Uracil-DNA_glycosylase	L	COG1573	Uracil-DNA_glycosylase	L	-
SRVP_Atabeya-1-FCNFGDKI_12180	SRVP_Atabeya-1_1218 # 1213343 # 1214773 # 1 # ID=1_1218;partial=00;start_type=TTG;rbs_motif=GGAG/GAGG;rbs_spacer=5-10bp;gc_cont=0.506	SRVP_Atabeya-1_1218	SR-VP_11_27_2022_S1_100cm_MT	4	1213343	1214773	1431	11625022	0.240451	arCOG01292	GltD	NADPH-dependent_glutamate_synthase_beta_chain_or_related_oxidoreductase	E	COG0492	Thioredoxin_reductase	O	-
SRVP_Atabeya-1-FCNFGDKI_12180	SRVP_Atabeya-1_1218 # 1213343 # 1214773 # 1 # ID=1_1218;partial=00;start_type=TTG;rbs_motif=GGAG/GAGG;rbs_spacer=5-10bp;gc_cont=0.506	SRVP_Atabeya-1_1218	SR-VP_07_25_2022_A4_70cm_MT	1	1213343	1214773	1431	19546	35.7522	arCOG01292	GltD	NADPH-dependent_glutamate_synthase_beta_chain_or_related_oxidoreductase	E	COG0492	Thioredoxin_reductase	O	-
SRVP_Atabeya-1-FCNFGDKI_12190	SRVP_Atabeya-1_1219 # 1214779 # 1217208 # 1 # ID=1_1219;partial=00;start_type=ATG;rbs_motif=GGAGG;rbs_spacer=5-10bp;gc_cont=0.489	SRVP_Atabeya-1_1219	SR-VP_11_27_2022_S1_100cm_MT	6	1214779	1217208	2430	11625022	0.212398	arCOG02476	HdrA	Heterodisulfide_reductase,_subunit_A;_ferredoxin_domain	C	COG1145	Ferredoxin	C	-
SRVP_Atabeya-1-FCNFGDKI_12220	SRVP_Atabeya-1_1222 # 1218654 # 1219517 # 1 # ID=1_1222;partial=00;start_type=ATG;rbs_motif=GGA/GAG/AGG;rbs_spacer=5-10bp;gc_cont=0.500	SRVP_Atabeya-1_1222	SR-VP_07_25_2022_A1_70cm_MT	3	1218654	1219517	864	125142	27.7463	arCOG01599	PorB	Pyruvate:ferredoxin_oxidoreductase_or_related_2-oxoacid:ferredoxin_oxidoreductase,_beta_subunit	C	COG1013	Pyruvate:ferredoxin_oxidoreductase_or_related_2-oxoacid:ferredoxin_oxidoreductase,_beta_subunit	C	Pyruvate_oxidation
SRVP_Atabeya-1-FCNFGDKI_12220	SRVP_Atabeya-1_1222 # 1218654 # 1219517 # 1 # ID=1_1222;partial=00;start_type=ATG;rbs_motif=GGA/GAG/AGG;rbs_spacer=5-10bp;gc_cont=0.500	SRVP_Atabeya-1_1222	SR-VP_11_27_2022_S1_100cm_MT	1	1218654	1219517	864	11625022	0.0995617	arCOG01599	PorB	Pyruvate:ferredoxin_oxidoreductase_or_related_2-oxoacid:ferredoxin_oxidoreductase,_beta_subunit	C	COG1013	Pyruvate:ferredoxin_oxidoreductase_or_related_2-oxoacid:ferredoxin_oxidoreductase,_beta_subunit	C	Pyruvate_oxidation
SRVP_Atabeya-1-FCNFGDKI_12340	SRVP_Atabeya-1_1234 # 1233682 # 1234665 # 1 # ID=1_1234;partial=00;start_type=ATG;rbs_motif=GGAG/GAGG;rbs_spacer=5-10bp;gc_cont=0.476	SRVP_Atabeya-1_1234	SR-VP_11_27_2022_S1_100cm_MT	1	1233682	1234665	984	11625022	0.0874201	-	-	-	-	COG2510	Riboflavin_transporter_RibN,_EamA_domain	H	-
SRVP_Atabeya-1-FCNFGDKI_12500	SRVP_Atabeya-1_1250 # 1251829 # 1253142 # -1 # ID=1_1250;partial=00;start_type=GTG;rbs_motif=AGGAG;rbs_spacer=5-10bp;gc_cont=0.519	SRVP_Atabeya-1_1250	SR-VP_11_27_2022_S1_100cm_MT	5	1251829	1253142	1314	11625022	0.327326	arCOG00679	-	Transposable_element,_IS605_OrfB_family,_contains_RNAse_H_fold_nuclease_and_Zn_finger_domains	X	COG0675	Transposase	X	-
SRVP_Atabeya-1-FCNFGDKI_12520	SRVP_Atabeya-1_1252 # 1254088 # 1254975 # 1 # ID=1_1252;partial=00;start_type=ATG;rbs_motif=None;rbs_spacer=None;gc_cont=0.532	SRVP_Atabeya-1_1252	SR-VP_11_27_2022_S1_80cm_MT	1	1254088	1254975	888	4000856	0.281471	arCOG00679	-	Transposable_element,_IS605_OrfB_family,_contains_RNAse_H_fold_nuclease_and_Zn_finger_domains	X	COG0675	Transposase	X	-
SRVP_Atabeya-1-FCNFGDKI_12550	SRVP_Atabeya-1_1255 # 1256919 # 1258499 # -1 # ID=1_1255;partial=00;start_type=TTG;rbs_motif=GGAG/GAGG;rbs_spacer=5-10bp;gc_cont=0.495	SRVP_Atabeya-1_1255	SR-VP_11_27_2022_S1_100cm_MT	43	1256919	1258499	1581	11625022	2.33961	-	-	-	-	-	-	-	-
SRVP_Atabeya-1-FCNFGDKI_12660	SRVP_Atabeya-1_1266 # 1269365 # 1272502 # -1 # ID=1_1266;partial=00;start_type=TTG;rbs_motif=AGGA/GGAG/GAGG;rbs_spacer=11-12bp;gc_cont=0.525	SRVP_Atabeya-1_1266	SR-VP_11_27_2022_S1_100cm_MT	3	1269365	1272502	3138	11625022	0.0822384	-	-	-	-	-	-	-	-
SRVP_Atabeya-1-FCNFGDKI_12700	SRVP_Atabeya-1_1270 # 1278762 # 1279547 # -1 # ID=1_1270;partial=00;start_type=TTG;rbs_motif=3Base/5BMM;rbs_spacer=13-15bp;gc_cont=0.509	SRVP_Atabeya-1_1270	SR-VP_11_27_2022_S2_40cm_MT	1	1278762	1279547	786	4025082	0.316084	arCOG04248	SIR2	NAD-dependent_protein_deacetylase,_SIR2_family	K	COG0846	NAD-dependent_protein_deacetylase,_SIR2_family	O	-
SRVP_Atabeya-1-FCNFGDKI_12710	SRVP_Atabeya-1_1271 # 1279892 # 1281196 # 1 # ID=1_1271;partial=00;start_type=ATG;rbs_motif=AGxAGG/AGGxGG;rbs_spacer=3-4bp;gc_cont=0.505	SRVP_Atabeya-1_1271	SR-VP_11_27_2022_S1_100cm_MT	2	1279892	1281196	1305	11625022	0.131833	arCOG02448	-	Uncharacterized_Fe-S_center_protein	R	COG2006	Uncharacterized_conserved_protein,_DUF362_family	S	-
SRVP_Atabeya-1-FCNFGDKI_12730	SRVP_Atabeya-1_1273 # 1283390 # 1284487 # -1 # ID=1_1273;partial=00;start_type=ATG;rbs_motif=AGxAG;rbs_spacer=5-10bp;gc_cont=0.463	SRVP_Atabeya-1_1273	SR-VP_11_27_2022_S1_100cm_MT	1	1283390	1284487	1098	11625022	0.0783437	-	-	-	-	COG1522	DNA-binding_transcriptional_regulator,_Lrp_family	K	-
SRVP_Atabeya-1-FCNFGDKI_12760	SRVP_Atabeya-1_1276 # 1286581 # 1287888 # 1 # ID=1_1276;partial=00;start_type=ATG;rbs_motif=AGGAG;rbs_spacer=5-10bp;gc_cont=0.496	SRVP_Atabeya-1_1276	SR-VP_11_27_2022_S1_100cm_MT	6	1286581	1287888	1308	11625022	0.394593	arCOG01521	-	Phytoene_dehydrogenase_or_related_enzyme	Q	COG1233	Phytoene_dehydrogenase-related_protein	Q	-
SRVP_Atabeya-1-FCNFGDKI_12890	SRVP_Atabeya-1_1289 # 1301224 # 1301889 # 1 # ID=1_1289;partial=00;start_type=ATG;rbs_motif=4Base/6BMM;rbs_spacer=13-15bp;gc_cont=0.489	SRVP_Atabeya-1_1289	SR-VP_11_27_2022_S1_100cm_MT	3	1301224	1301889	666	11625022	0.387484	arCOG05343	-	GTPase_SAR1_or_related_small_G_protein	R	COG1100	GTPase_SAR1_family_domain	R	-
SRVP_Atabeya-1-FCNFGDKI_12910	SRVP_Atabeya-1_1291 # 1303112 # 1303456 # 1 # ID=1_1291;partial=00;start_type=ATG;rbs_motif=AGGA/GGAG/GAGG;rbs_spacer=11-12bp;gc_cont=0.490	SRVP_Atabeya-1_1291	SR-VP_11_27_2022_S1_100cm_MT	4	1303112	1303456	345	11625022	0.997349	-	-	-	-	-	-	-	-
SRVP_Atabeya-1-FCNFGDKI_12920	SRVP_Atabeya-1_1292 # 1303603 # 1304838 # -1 # ID=1_1292;partial=00;start_type=ATG;rbs_motif=GGAGG;rbs_spacer=5-10bp;gc_cont=0.516	SRVP_Atabeya-1_1292	SR-VP_07_25_2022_A4_70cm_MT	2	1303603	1304838	1236	19546	82.7854	arCOG00963	GlpC	Succinate_dehydrogenase/fumarate_reductase,_Fe-S_protein_subunit	C	COG2048	Heterodisulfide_reductase,_subunit_B	C	-
SRVP_Atabeya-1-FCNFGDKI_12920	SRVP_Atabeya-1_1292 # 1303603 # 1304838 # -1 # ID=1_1292;partial=00;start_type=ATG;rbs_motif=GGAGG;rbs_spacer=5-10bp;gc_cont=0.516	SRVP_Atabeya-1_1292	SR-VP_07_25_2022_A1_70cm_MT	1	1303603	1304838	1236	125142	6.46515	arCOG00963	GlpC	Succinate_dehydrogenase/fumarate_reductase,_Fe-S_protein_subunit	C	COG2048	Heterodisulfide_reductase,_subunit_B	C	-
SRVP_Atabeya-1-FCNFGDKI_13020	SRVP_Atabeya-1_1302 # 1315240 # 1316763 # 1 # ID=1_1302;partial=00;start_type=GTG;rbs_motif=AGGAGG;rbs_spacer=5-10bp;gc_cont=0.469	SRVP_Atabeya-1_1302	SR-VP_11_27_2022_S1_100cm_MT	1	1315240	1316763	1524	11625022	0.0564445	arCOG00025	XylB	Sugar_(pentulose_and_hexulose)_kinase	G	COG1070	Sugar_(pentulose_or_hexulose)_kinase	G	Non-phosphorylated_Entner-Doudoroff_pathway
SRVP_Atabeya-1-FCNFGDKI_13040	SRVP_Atabeya-1_1304 # 1320234 # 1321415 # 1 # ID=1_1304;partial=00;start_type=ATG;rbs_motif=AGxAG;rbs_spacer=11-12bp;gc_cont=0.497	SRVP_Atabeya-1_1304	SR-VP_07_25_2022_A1_70cm_MT	1	1320234	1321415	1182	125142	6.76051	-	-	-	-	-	-	-	-
SRVP_Atabeya-1-FCNFGDKI_13210	SRVP_Atabeya-1_1321 # 1338491 # 1339747 # 1 # ID=1_1321;partial=00;start_type=TTG;rbs_motif=AGGAGG;rbs_spacer=5-10bp;gc_cont=0.495	SRVP_Atabeya-1_1321	SR-VP_11_27_2022_S1_100cm_MT	5	1338491	1339747	1257	11625022	0.342169	arCOG01352	GdhA	Glutamate_dehydrogenase/leucine_dehydrogenase	E	COG0334	Glutamate_dehydrogenase/leucine_dehydrogenase	E	Glutamine_biosynthesis
SRVP_Atabeya-1-FCNFGDKI_13270	SRVP_Atabeya-1_1327 # 1345489 # 1347372 # -1 # ID=1_1327;partial=00;start_type=TTG;rbs_motif=GGAGG;rbs_spacer=5-10bp;gc_cont=0.493	SRVP_Atabeya-1_1327	SR-VP_11_27_2022_S1_100cm_MT	2	1345489	1347372	1884	11625022	0.0913178	arCOG00890	-	DNA_modification_methylase	L	COG1041	tRNA_G10_N-methylase_Trm11	J	tRNA_modification
SRVP_Atabeya-1-FCNFGDKI_13300	SRVP_Atabeya-1_1330 # 1350480 # 1351334 # 1 # ID=1_1330;partial=00;start_type=ATG;rbs_motif=GGA/GAG/AGG;rbs_spacer=5-10bp;gc_cont=0.505	SRVP_Atabeya-1_1330	SR-VP_11_27_2022_S1_100cm_MT	2	1350480	1351334	855	11625022	0.20122	arCOG00043	-	ATP-utilizing_enzyme_of_the_PP-loop_superfamily	R	COG1606	ATP-utilizing_enzyme,_PP-loop_superfamily	R	-
SRVP_Atabeya-1-FCNFGDKI_13460	SRVP_Atabeya-1_1346 # 1365433 # 1366599 # 1 # ID=1_1346;partial=00;start_type=ATG;rbs_motif=GGxGG;rbs_spacer=5-10bp;gc_cont=0.521	SRVP_Atabeya-1_1346	SR-VP_11_27_2022_S1_100cm_MT	6	1365433	1366599	1167	11625022	0.442269	arCOG00082	PucG	Serine-pyruvate_aminotransferase/archaeal_aspartate_aminotransferase	EF	COG0075	Archaeal_aspartate_aminotransferase_or_a_related_aminotransferase,_includes_purine_catabolism_protein_PucG	EF	Serine_biosynthesis
SRVP_Atabeya-1-FCNFGDKI_13480	SRVP_Atabeya-1_1348 # 1368011 # 1369081 # -1 # ID=1_1348;partial=00;start_type=ATG;rbs_motif=GGAG/GAGG;rbs_spacer=5-10bp;gc_cont=0.501	SRVP_Atabeya-1_1348	SR-VP_11_27_2022_S1_100cm_MT	2	1368011	1369081	1071	11625022	0.160637	arCOG05361	GalM	Galactose_mutarotase_or_related_enzyme	G	COG2017	Galactose_mutarotase_or_related_enzyme	G	-
SRVP_Atabeya-1-FCNFGDKI_13520	SRVP_Atabeya-1_1352 # 1371305 # 1372687 # 1 # ID=1_1352;partial=00;start_type=TTG;rbs_motif=GGAG/GAGG;rbs_spacer=5-10bp;gc_cont=0.500	SRVP_Atabeya-1_1352	SR-VP_11_27_2022_S1_100cm_MT	1	1371305	1372687	1383	11625022	0.0621991	arCOG02447	-	Uncharacterized_protein	S	COG2006	Uncharacterized_conserved_protein,_DUF362_family	S	-
SRVP_Atabeya-1-FCNFGDKI_13580	SRVP_Atabeya-1_1358 # 1378341 # 1379024 # -1 # ID=1_1358;partial=00;start_type=ATG;rbs_motif=AGGAG;rbs_spacer=5-10bp;gc_cont=0.412	SRVP_Atabeya-1_1358	SR-VP_11_27_2022_S1_100cm_MT	1	1378341	1379024	684	11625022	0.125762	-	-	-	-	-	-	-	-
SRVP_Atabeya-1-FCNFGDKI_13610	SRVP_Atabeya-1_1361 # 1381384 # 1382283 # -1 # ID=1_1361;partial=00;start_type=ATG;rbs_motif=None;rbs_spacer=None;gc_cont=0.490	SRVP_Atabeya-1_1361	SR-VP_11_27_2022_S1_40cm_MT	1	1381384	1382283	900	1473124	0.754255	arCOG02966	-	HEAT_repeats_containing_protein	S	COG4335	3-methylpurine_DNA_glycosylase_AlkC	L	-
SRVP_Atabeya-1-FCNFGDKI_13610	SRVP_Atabeya-1_1361 # 1381384 # 1382283 # -1 # ID=1_1361;partial=00;start_type=ATG;rbs_motif=None;rbs_spacer=None;gc_cont=0.490	SRVP_Atabeya-1_1361	SR-VP_11_27_2022_S1_60cm_MT	1	1381384	1382283	900	1990488	0.55821	arCOG02966	-	HEAT_repeats_containing_protein	S	COG4335	3-methylpurine_DNA_glycosylase_AlkC	L	-
SRVP_Atabeya-1-FCNFGDKI_13630	SRVP_Atabeya-1_1363 # 1383888 # 1386377 # -1 # ID=1_1363;partial=00;start_type=TTG;rbs_motif=GGAG/GAGG;rbs_spacer=5-10bp;gc_cont=0.513	SRVP_Atabeya-1_1363	SR-VP_11_27_2022_S1_100cm_MT	4	1383888	1386377	2490	11625022	0.138187	arCOG01534	DdpA	ABC-type_transport_system,_periplasmic_component	E	COG0747	ABC-type_transport_system,_periplasmic_component	E	-
SRVP_Atabeya-1-FCNFGDKI_13670	SRVP_Atabeya-1_1367 # 1388353 # 1389087 # 1 # ID=1_1367;partial=00;start_type=ATG;rbs_motif=4Base/6BMM;rbs_spacer=13-15bp;gc_cont=0.488	SRVP_Atabeya-1_1367	SR-VP_11_27_2022_S1_100cm_MT	1	1388353	1389087	735	11625022	0.117036	-	-	-	-	-	-	-	-
SRVP_Atabeya-1-FCNFGDKI_13710	SRVP_Atabeya-1_1371 # 1393677 # 1394450 # 1 # ID=1_1371;partial=00;start_type=GTG;rbs_motif=GGAG/GAGG;rbs_spacer=5-10bp;gc_cont=0.506	SRVP_Atabeya-1_1371	SR-VP_11_27_2022_S1_100cm_MT	1	1393677	1394450	774	11625022	0.111139	arCOG01006	ZnuB	ABC-type_Mn2+/Zn2+_transport_system,_permease_component	P	COG1108	ABC-type_Mn2+/Zn2+_transport_system,_permease_component	P	-
SRVP_Atabeya-1-FCNFGDKI_13770	SRVP_Atabeya-1_1377 # 1401454 # 1402077 # -1 # ID=1_1377;partial=00;start_type=ATG;rbs_motif=GGAG/GAGG;rbs_spacer=5-10bp;gc_cont=0.481	SRVP_Atabeya-1_1377	SR-VP_11_27_2022_S1_100cm_MT	1	1401454	1402077	624	11625022	0.137855	arCOG00517	-	Rhodanese_Homology_Domain_fused_to_Zn-dependent_hydrolase_of_beta-lactamase_superfamily	R	COG0491	Glyoxylase_or_a_related_metal-dependent_hydrolase,_beta-lactamase_superfamily_II	R	-
SRVP_Atabeya-1-FCNFGDKI_13780	SRVP_Atabeya-1_1378 # 1402096 # 1403085 # -1 # ID=1_1378;partial=00;start_type=TTG;rbs_motif=AGxAGG/AGGxGG;rbs_spacer=5-10bp;gc_cont=0.483	SRVP_Atabeya-1_1378	SR-VP_11_27_2022_S1_100cm_MT	1	1402096	1403085	990	11625022	0.0868902	arCOG00271	RhaT	Permease_of_the_drug/metabolite_transporter_(DMT)_superfamily	G	COG5006	Threonine/homoserine_efflux_transporter_RhtA	E	-
SRVP_Atabeya-1-FCNFGDKI_13890	SRVP_Atabeya-1_1389 # 1413553 # 1414644 # -1 # ID=1_1389;partial=00;start_type=TTG;rbs_motif=AGGAG/GGAGG;rbs_spacer=11-12bp;gc_cont=0.508	SRVP_Atabeya-1_1389	SR-VP_11_27_2022_S1_100cm_MT	1	1413553	1414644	1092	11625022	0.0787741	arCOG04369	-	Predicted_transcriptional_regulator/sugar_kinase	K	COG1548	Methanofuran_synthetase_MfnF,_hydantoinase/oxoprolinase_family	H	-
SRVP_Atabeya-1-FCNFGDKI_13920	SRVP_Atabeya-1_1392 # 1417783 # 1418991 # -1 # ID=1_1392;partial=00;start_type=TTG;rbs_motif=AGxAG;rbs_spacer=11-12bp;gc_cont=0.514	SRVP_Atabeya-1_1392	SR-VP_07_25_2022_A4_70cm_MT	1	1417783	1418991	1209	19546	42.3171	arCOG03323	MtbA	Methylcobalamin:coenzyme_M_methyltransferase	H	COG0407	Uroporphyrinogen-III_decarboxylase_HemE	H	Heme_biosynthesis
SRVP_Atabeya-1-FCNFGDKI_13960	SRVP_Atabeya-1_1396 # 1420983 # 1422278 # -1 # ID=1_1396;partial=00;start_type=ATG;rbs_motif=AGxAGG/AGGxGG;rbs_spacer=5-10bp;gc_cont=0.498	SRVP_Atabeya-1_1396	SR-VP_11_27_2022_S1_100cm_MT	8	1420983	1422278	1296	11625022	0.530996	arCOG02491	-	WD40_repeats_containing_protein	S	COG4946	Uncharacterized_N-terminal_domain_of_tricorn_protease,_contains_WD40_repeats	S	-
SRVP_Atabeya-1-FCNFGDKI_13970	SRVP_Atabeya-1_1397 # 1422523 # 1424889 # -1 # ID=1_1397;partial=00;start_type=ATG;rbs_motif=GGxGG;rbs_spacer=5-10bp;gc_cont=0.502	SRVP_Atabeya-1_1397	SR-VP_11_27_2022_S1_100cm_MT	1	1422523	1424889	2367	11625022	0.0363419	arCOG06130	PflD	Pyruvate-formate_lyase	C	COG1882	Pyruvate-formate_lyase	C	Pyruvate_oxidation
SRVP_Atabeya-1-FCNFGDKI_14120	SRVP_Atabeya-1_1412 # 1444212 # 1444574 # -1 # ID=1_1412;partial=00;start_type=ATG;rbs_motif=GGxGG;rbs_spacer=5-10bp;gc_cont=0.499	SRVP_Atabeya-1_1412	SR-VP_11_27_2022_S1_100cm_MT	1	1444212	1444574	363	11625022	0.236973	arCOG07113	-	TBP-like_domain	R	COG4871	Metal-binding_trascriptional_regulator,_contains_Fe-S_cluster_and_ArsR_family_DNA_binding_domain	K	-
SRVP_Atabeya-1-FCNFGDKI_14230	SRVP_Atabeya-1_1423 # 1457090 # 1458349 # 1 # ID=1_1423;partial=00;start_type=GTG;rbs_motif=GGA/GAG/AGG;rbs_spacer=5-10bp;gc_cont=0.494	SRVP_Atabeya-1_1423	SR-VP_11_27_2022_S1_100cm_MT	3	1457090	1458349	1260	11625022	0.204813	arCOG00130	-	MFS_family_permease	G	COG2807	Cyanate_permease	P	-
SRVP_Atabeya-1-FCNFGDKI_14270	SRVP_Atabeya-1_1427 # 1461141 # 1461965 # 1 # ID=1_1427;partial=00;start_type=ATG;rbs_motif=GGA/GAG/AGG;rbs_spacer=5-10bp;gc_cont=0.493	SRVP_Atabeya-1_1427	SR-VP_11_27_2022_S1_100cm_MT	2	1461141	1461965	825	11625022	0.208537	arCOG02199	Mcr1	NAD(P)H-flavin_reductase	H	COG0543	NAD(P)H-flavin_reductase	HC	-
SRVP_Atabeya-1-FCNFGDKI_14350	SRVP_Atabeya-1_1435 # 1471900 # 1475532 # -1 # ID=1_1435;partial=00;start_type=ATG;rbs_motif=AGGA/GGAG/GAGG;rbs_spacer=11-12bp;gc_cont=0.478	SRVP_Atabeya-1_1435	SR-VP_07_25_2022_A4_70cm_MT	1	1471900	1475532	3633	19546	14.0824	arCOG04748	UvrB	Excinuclease_ABC_subunit_B,_helicase	L	COG0556	Excinuclease_UvrABC_helicase_subunit_UvrB	L	-
SRVP_Atabeya-1-FCNFGDKI_14410	SRVP_Atabeya-1_1441 # 1478766 # 1479116 # -1 # ID=1_1441;partial=00;start_type=TTG;rbs_motif=AGGAGG;rbs_spacer=5-10bp;gc_cont=0.493	SRVP_Atabeya-1_1441	SR-VP_11_27_2022_S1_100cm_MT	12	1478766	1479116	351	11625022	2.9409	arCOG01205	-	Minimal_nucleotidyltransferase	V	COG1708	Predicted_nucleotidyltransferase,_MJ0604_family	R	-
SRVP_Atabeya-1-FCNFGDKI_14410	SRVP_Atabeya-1_1441 # 1478766 # 1479116 # -1 # ID=1_1441;partial=00;start_type=TTG;rbs_motif=AGGAGG;rbs_spacer=5-10bp;gc_cont=0.493	SRVP_Atabeya-1_1441	SR-VP_07_25_2022_A4_70cm_MT	2	1478766	1479116	351	19546	291.518	arCOG01205	-	Minimal_nucleotidyltransferase	V	COG1708	Predicted_nucleotidyltransferase,_MJ0604_family	R	-
SRVP_Atabeya-1-FCNFGDKI_14410	SRVP_Atabeya-1_1441 # 1478766 # 1479116 # -1 # ID=1_1441;partial=00;start_type=TTG;rbs_motif=AGGAGG;rbs_spacer=5-10bp;gc_cont=0.493	SRVP_Atabeya-1_1441	SR-VP_11_27_2022_S2_40cm_MT	1	1478766	1479116	351	4025082	0.707812	arCOG01205	-	Minimal_nucleotidyltransferase	V	COG1708	Predicted_nucleotidyltransferase,_MJ0604_family	R	-
SRVP_Atabeya-1-FCNFGDKI_14410	SRVP_Atabeya-1_1441 # 1478766 # 1479116 # -1 # ID=1_1441;partial=00;start_type=TTG;rbs_motif=AGGAGG;rbs_spacer=5-10bp;gc_cont=0.493	SRVP_Atabeya-1_1441	SR-VP_11_27_2022_S1_40cm_MT	1	1478766	1479116	351	1473124	1.93399	arCOG01205	-	Minimal_nucleotidyltransferase	V	COG1708	Predicted_nucleotidyltransferase,_MJ0604_family	R	-
SRVP_Atabeya-1-FCNFGDKI_14410	SRVP_Atabeya-1_1441 # 1478766 # 1479116 # -1 # ID=1_1441;partial=00;start_type=TTG;rbs_motif=AGGAGG;rbs_spacer=5-10bp;gc_cont=0.493	SRVP_Atabeya-1_1441	SR-VP_11_27_2022_S1_80cm_MT	1	1478766	1479116	351	4000856	0.712098	arCOG01205	-	Minimal_nucleotidyltransferase	V	COG1708	Predicted_nucleotidyltransferase,_MJ0604_family	R	-
SRVP_Atabeya-1-FCNFGDKI_14450	SRVP_Atabeya-1_1445 # 1481727 # 1482587 # -1 # ID=1_1445;partial=00;start_type=TTG;rbs_motif=GGAG/GAGG;rbs_spacer=5-10bp;gc_cont=0.523	SRVP_Atabeya-1_1445	SR-VP_11_27_2022_S1_100cm_MT	3	1481727	1482587	861	11625022	0.299726	arCOG00362	Srp102	Signal_recognition_particle_receptor_subunit_beta,_a_GTPase	U	COG1100	GTPase_SAR1_family_domain	R	-
SRVP_Atabeya-1-FCNFGDKI_14460	SRVP_Atabeya-1_1446 # 1482877 # 1483968 # 1 # ID=1_1446;partial=00;start_type=TTG;rbs_motif=GGAG/GAGG;rbs_spacer=5-10bp;gc_cont=0.501	SRVP_Atabeya-1_1446	SR-VP_11_27_2022_S1_100cm_MT	3	1482877	1483968	1092	11625022	0.236322	arCOG01683	ArsR	Transcriptional_regulator_containing_HTH_domain,_ArsR_family	K	COG1777	Predicted_transcriptional_regulator,_ArsR_family	K	-
SRVP_Atabeya-1-FCNFGDKI_14470	SRVP_Atabeya-1_1447 # 1484054 # 1488460 # 1 # ID=1_1447;partial=00;start_type=ATG;rbs_motif=AGGAG(G)/GGAGG;rbs_spacer=13-15bp;gc_cont=0.518	SRVP_Atabeya-1_1447	SR-VP_11_27_2022_S1_100cm_MT	12	1484054	1488460	4407	11625022	0.234231	-	-	-	-	-	-	-	-
SRVP_Atabeya-1-FCNFGDKI_14490	SRVP_Atabeya-1_1449 # 1490537 # 1494517 # 1 # ID=1_1449;partial=00;start_type=TTG;rbs_motif=GGA/GAG/AGG;rbs_spacer=5-10bp;gc_cont=0.499	SRVP_Atabeya-1_1449	SR-VP_11_27_2022_S1_100cm_MT	2	1490537	1494517	3981	11625022	0.0432159	arCOG03439	-	vWFa_domain_containing_protein	R	COG0467	RecA-superfamily_ATPase,_KaiC/GvpD/RAD55_family	T	-
SRVP_Atabeya-1-FCNFGDKI_14510	SRVP_Atabeya-1_1451 # 1495523 # 1496722 # -1 # ID=1_1451;partial=00;start_type=ATG;rbs_motif=AGGA/GGAG/GAGG;rbs_spacer=11-12bp;gc_cont=0.525	SRVP_Atabeya-1_1451	SR-VP_11_27_2022_S1_100cm_MT	3	1495523	1496722	1200	11625022	0.215053	arCOG01282	PaaJ	Acetyl-CoA_acetyltransferase	I	COG0183	Acetyl-CoA_acetyltransferase	I	Fatty_acid_biosynthesis
SRVP_Atabeya-1-FCNFGDKI_14570	SRVP_Atabeya-1_1457 # 1501620 # 1503314 # 1 # ID=1_1457;partial=00;start_type=TTG;rbs_motif=AGGAG/GGAGG;rbs_spacer=11-12bp;gc_cont=0.471	SRVP_Atabeya-1_1457	SR-VP_11_27_2022_S1_100cm_MT	1	1501620	1503314	1695	11625022	0.0507501	-	-	-	-	COG4805	Uncharacterized_conserved_protein,_DUF885_family	S	-
SRVP_Atabeya-1-FCNFGDKI_14590	SRVP_Atabeya-1_1459 # 1504426 # 1505400 # 1 # ID=1_1459;partial=00;start_type=ATG;rbs_motif=3Base/5BMM;rbs_spacer=13-15bp;gc_cont=0.516	SRVP_Atabeya-1_1459	SR-VP_11_27_2022_S1_100cm_MT	3	1504426	1505400	975	11625022	0.264681	arCOG02772	NapH	Polyferredoxin	C	COG0348	Polyferredoxin_NapH	C	-
SRVP_Atabeya-1-FCNFGDKI_14610	SRVP_Atabeya-1_1461 # 1506229 # 1508610 # 1 # ID=1_1461;partial=00;start_type=ATG;rbs_motif=None;rbs_spacer=None;gc_cont=0.511	SRVP_Atabeya-1_1461	SR-VP_11_27_2022_S1_100cm_MT	106	1506229	1508610	2382	11625022	3.82799	arCOG00374	-	Predicted_membrane-associated_or_secreted_trancriptional_regulator	K	-	-	-	-
SRVP_Atabeya-1-FCNFGDKI_14700	SRVP_Atabeya-1_1470 # 1514933 # 1516075 # -1 # ID=1_1470;partial=00;start_type=ATG;rbs_motif=4Base/6BMM;rbs_spacer=13-15bp;gc_cont=0.500	SRVP_Atabeya-1_1470	SR-VP_11_27_2022_S1_80cm_MT	1	1514933	1516075	1143	4000856	0.218676	arCOG04253	-	Uncharacterized_protein,_DUF763_family	S	COG1415	Uncharacterized_conserved_protein,_DUF763_domain	S	-
SRVP_Atabeya-1-FCNFGDKI_14720	SRVP_Atabeya-1_1472 # 1516469 # 1518985 # -1 # ID=1_1472;partial=00;start_type=GTG;rbs_motif=GGA/GAG/AGG;rbs_spacer=5-10bp;gc_cont=0.501	SRVP_Atabeya-1_1472	SR-VP_11_27_2022_S1_100cm_MT	3	1516469	1518985	2517	11625022	0.102528	arCOG01578	MgtA	Cation_transport_ATPase	P	COG0474	Magnesium-transporting_ATPase_(P-type)	P	-
SRVP_Atabeya-1-FCNFGDKI_14730	SRVP_Atabeya-1_1473 # 1519136 # 1519903 # -1 # ID=1_1473;partial=00;start_type=TTG;rbs_motif=GGAG/GAGG;rbs_spacer=5-10bp;gc_cont=0.475	SRVP_Atabeya-1_1473	SR-VP_11_27_2022_S1_100cm_MT	2	1519136	1519903	768	11625022	0.224014	arCOG01475	MMT1	Predicted_Co/Zn/Cd_cation_transporter	P	COG0053	Divalent_metal_cation_(Fe/Co/Zn/Cd)_efflux_pump	P	-
SRVP_Atabeya-1-FCNFGDKI_14760	SRVP_Atabeya-1_1476 # 1522713 # 1523921 # -1 # ID=1_1476;partial=00;start_type=TTG;rbs_motif=AGGAG/GGAGG;rbs_spacer=11-12bp;gc_cont=0.511	SRVP_Atabeya-1_1476	SR-VP_11_27_2022_S1_100cm_MT	2	1522713	1523921	1209	11625022	0.142302	arCOG01707	CaiA	Acyl-CoA_dehydrogenase	I	COG1960	Acyl-CoA_dehydrogenase_related_to_the_alkylation_response_protein_AidB	I	Fatty_acid_biosynthesis
SRVP_Atabeya-1-FCNFGDKI_14790	SRVP_Atabeya-1_1479 # 1525109 # 1526257 # 1 # ID=1_1479;partial=00;start_type=TTG;rbs_motif=GGAG/GAGG;rbs_spacer=5-10bp;gc_cont=0.503	SRVP_Atabeya-1_1479	SR-VP_11_27_2022_S1_100cm_MT	3	1525109	1526257	1149	11625022	0.224599	arCOG00014	RbsK	Sugar_kinase,_ribokinase_family	G	COG0524	Sugar_or_nucleoside_kinase,_ribokinase_family	G	Glycolysis
SRVP_Atabeya-1-FCNFGDKI_14820	SRVP_Atabeya-1_1482 # 1527197 # 1528648 # -1 # ID=1_1482;partial=00;start_type=ATG;rbs_motif=GGA/GAG/AGG;rbs_spacer=5-10bp;gc_cont=0.481	SRVP_Atabeya-1_1482	SR-VP_11_27_2022_S1_100cm_MT	1	1527197	1528648	1452	11625022	0.0592433	arCOG02143	HpaB	4-hydroxyphenylacetate_3-monooxygenase	C	COG2368	Aromatic_ring_hydroxylase	Q	-
SRVP_Atabeya-1-FCNFGDKI_14870	SRVP_Atabeya-1_1487 # 1531747 # 1533720 # 1 # ID=1_1487;partial=00;start_type=ATG;rbs_motif=GGAGG;rbs_spacer=5-10bp;gc_cont=0.455	SRVP_Atabeya-1_1487	SR-VP_11_27_2022_S1_100cm_MT	4	1531747	1533720	1974	11625022	0.174309	arCOG03235	-	Predicted_ATP-dependent_endonuclease_of_the_OLD_family	L	COG3593	Predicted_ATP-dependent_endonuclease_of_the_OLD_family,_contains_P-loop_ATPase_and_TOPRIM_domains	L	-
SRVP_Atabeya-1-FCNFGDKI_14970	SRVP_Atabeya-1_1497 # 1542024 # 1544951 # -1 # ID=1_1497;partial=00;start_type=ATG;rbs_motif=AGxAGG/AGGxGG;rbs_spacer=3-4bp;gc_cont=0.435	SRVP_Atabeya-1_1497	SR-VP_11_27_2022_S1_100cm_MT	2	1542024	1544951	2928	11625022	0.0587577	arCOG06747	-	SIR2_superfamily_protein	R	COG5635	Predicted_NTPase,_NACHT_family_domain	T	-
SRVP_Atabeya-1-FCNFGDKI_15210	SRVP_Atabeya-1_1521 # 1569027 # 1570478 # -1 # ID=1_1521;partial=00;start_type=ATG;rbs_motif=AGGAGG;rbs_spacer=5-10bp;gc_cont=0.523	SRVP_Atabeya-1_1521	SR-VP_11_27_2022_S1_100cm_MT	3	1569027	1570478	1452	11625022	0.17773	arCOG03310	KatE	Catalase	P	COG0753	Catalase	P	-
SRVP_Atabeya-1-FCNFGDKI_15570	SRVP_Atabeya-1_1557 # 1594298 # 1596220 # 1 # ID=1_1557;partial=00;start_type=ATG;rbs_motif=AGGAG(G)/GGAGG;rbs_spacer=13-15bp;gc_cont=0.511	SRVP_Atabeya-1_1557	SR-VP_11_27_2022_S1_100cm_MT	1	1594298	1596220	1923	11625022	0.0447329	arCOG00401	ThrS	Threonyl-tRNA_synthetase	J	COG0441	Threonyl-tRNA_synthetase	J	Aminoacyl-tRNA_synthetases
SRVP_Atabeya-1-FCNFGDKI_15650	SRVP_Atabeya-1_1565 # 1601772 # 1602689 # -1 # ID=1_1565;partial=00;start_type=ATG;rbs_motif=None;rbs_spacer=None;gc_cont=0.510	SRVP_Atabeya-1_1565	SR-VP_11_27_2022_S1_100cm_MT	1	1601772	1602689	918	11625022	0.0937052	arCOG02019	SseA	Rhodanese-related_sulfurtransferase	P	-	-	-	-
SRVP_Atabeya-1-FCNFGDKI_15660	SRVP_Atabeya-1_1566 # 1602820 # 1603503 # 1 # ID=1_1566;partial=00;start_type=TTG;rbs_motif=GGAGG;rbs_spacer=5-10bp;gc_cont=0.482	SRVP_Atabeya-1_1566	SR-VP_11_27_2022_S1_100cm_MT	1	1602820	1603503	684	11625022	0.125762	arCOG00312	AhpC	AhpC/TSA_family_peroxiredoxin	O	COG2077	Peroxiredoxin	O	-
SRVP_Atabeya-1-FCNFGDKI_15760	SRVP_Atabeya-1_1576 # 1611789 # 1612115 # -1 # ID=1_1576;partial=00;start_type=ATG;rbs_motif=GGA/GAG/AGG;rbs_spacer=5-10bp;gc_cont=0.437	SRVP_Atabeya-1_1576	SR-VP_11_27_2022_S1_100cm_MT	2	1611789	1612115	327	11625022	0.526124	arCOG07119	-	Uncharacterized_membrane_protein	S	-	-	-	-
SRVP_Atabeya-1-FCNFGDKI_15790	SRVP_Atabeya-1_1579 # 1614332 # 1614727 # -1 # ID=1_1579;partial=00;start_type=ATG;rbs_motif=AGGA/GGAG/GAGG;rbs_spacer=11-12bp;gc_cont=0.487	SRVP_Atabeya-1_1579	SR-VP_11_27_2022_S1_100cm_MT	3	1614332	1614727	396	11625022	0.651677	-	-	-	-	-	-	-	-
SRVP_Atabeya-1-FCNFGDKI_15840	SRVP_Atabeya-1_1584 # 1620083 # 1621753 # 1 # ID=1_1584;partial=00;start_type=ATG;rbs_motif=None;rbs_spacer=None;gc_cont=0.503	SRVP_Atabeya-1_1584	SR-VP_11_27_2022_S1_100cm_MT	1	1620083	1621753	1671	11625022	0.051479	arCOG01648	MhpC	Alpha/beta_superfamily_hydrolase	R	COG2945	Alpha/beta_superfamily_hydrolase	R	-
SRVP_Atabeya-1-FCNFGDKI_15850	SRVP_Atabeya-1_1585 # 1622152 # 1622613 # 1 # ID=1_1585;partial=00;start_type=TTG;rbs_motif=GGAG/GAGG;rbs_spacer=5-10bp;gc_cont=0.463	SRVP_Atabeya-1_1585	SR-VP_11_27_2022_S1_100cm_MT	1	1622152	1622613	462	11625022	0.186193	arCOG03156	-	DNA_endonuclease_related_to_intein-encoded_endonuclease	L	COG1372	Intein/homing_endonuclease	LX	-
SRVP_Atabeya-1-FCNFGDKI_15980	SRVP_Atabeya-1_1598 # 1635161 # 1635310 # 1 # ID=1_1598;partial=00;start_type=ATG;rbs_motif=AGGAG/GGAGG;rbs_spacer=11-12bp;gc_cont=0.500	SRVP_Atabeya-1_1598	SR-VP_11_27_2022_S1_100cm_MT	2	1635161	1635310	150	11625022	1.14695	-	-	-	-	COG3350	Heavy_metal-bindng_TRASH/YHS_domain,_predicted_Cu/Ag_metallochaperone	P	-
SRVP_Atabeya-1-FCNFGDKI_16040	SRVP_Atabeya-1_1604 # 1639129 # 1640424 # 1 # ID=1_1604;partial=00;start_type=GTG;rbs_motif=GGAG/GAGG;rbs_spacer=5-10bp;gc_cont=0.481	SRVP_Atabeya-1_1604	SR-VP_11_27_2022_S1_100cm_MT	8	1639129	1640424	1296	11625022	0.530996	arCOG00130	-	MFS_family_permease	G	COG2271	Sugar_phosphate_permease	G	-
SRVP_Atabeya-1-FCNFGDKI_16170	SRVP_Atabeya-1_1617 # 1651060 # 1652154 # -1 # ID=1_1617;partial=00;start_type=ATG;rbs_motif=None;rbs_spacer=None;gc_cont=0.440	SRVP_Atabeya-1_1617	SR-VP_11_27_2022_S1_100cm_MT	13	1651060	1652154	1095	11625022	1.02126	-	-	-	-	-	-	-	-
SRVP_Atabeya-1-FCNFGDKI_16330	SRVP_Atabeya-1_1633 # 1666695 # 1667654 # -1 # ID=1_1633;partial=00;start_type=TTG;rbs_motif=GGA/GAG/AGG;rbs_spacer=11-12bp;gc_cont=0.481	SRVP_Atabeya-1_1633	SR-VP_11_27_2022_S1_100cm_MT	1	1666695	1667654	960	11625022	0.0896056	arCOG04301	MptA	Fe(2+)-dependent_GTP_cyclohydrolase	H	COG1469	GTP_cyclohydrolase_FolE2	H	Folate_biosynthesis
SRVP_Atabeya-1-FCNFGDKI_16400	SRVP_Atabeya-1_1640 # 1675284 # 1677248 # 1 # ID=1_1640;partial=00;start_type=ATG;rbs_motif=4Base/6BMM;rbs_spacer=13-15bp;gc_cont=0.511	SRVP_Atabeya-1_1640	SR-VP_11_27_2022_S1_100cm_MT	1	1675284	1677248	1965	11625022	0.0437768	arCOG05792	-	HEAT_repeats_containing_protein	S	COG2888	Predicted_RNA-binding_protein_involved_in_translation,_contains__Zn-ribbon_domain,_DUF1610_family	R	-
SRVP_Atabeya-1-FCNFGDKI_16590	SRVP_Atabeya-1_1659 # 1696187 # 1696546 # 1 # ID=1_1659;partial=00;start_type=ATG;rbs_motif=GGAG/GAGG;rbs_spacer=5-10bp;gc_cont=0.506	SRVP_Atabeya-1_1659	SR-VP_11_27_2022_S1_100cm_MT	5	1696187	1696546	360	11625022	1.19474	arCOG03769	-	Uncharacterized_membrane_protein	S	-	-	-	-
SRVP_Atabeya-1-FCNFGDKI_16670	SRVP_Atabeya-1_1667 # 1704152 # 1707247 # 1 # ID=1_1667;partial=00;start_type=TTG;rbs_motif=GGAG/GAGG;rbs_spacer=5-10bp;gc_cont=0.517	SRVP_Atabeya-1_1667	SR-VP_11_27_2022_S1_100cm_MT	34	1704152	1707247	3096	11625022	0.944679	arCOG00704	AprE	Surface_layer-associated_subtilisin-like_serine_protease	O	COG4934	Serine_protease,_subtilase_family	O	-
SRVP_Atabeya-1-FCNFGDKI_16670	SRVP_Atabeya-1_1667 # 1704152 # 1707247 # 1 # ID=1_1667;partial=00;start_type=TTG;rbs_motif=GGAG/GAGG;rbs_spacer=5-10bp;gc_cont=0.517	SRVP_Atabeya-1_1667	SR-VP_11_27_2022_S1_80cm_MT	1	1704152	1707247	3096	4000856	0.0807321	arCOG00704	AprE	Surface_layer-associated_subtilisin-like_serine_protease	O	COG4934	Serine_protease,_subtilase_family	O	-
SRVP_Atabeya-1-FCNFGDKI_16820	SRVP_Atabeya-1_1682 # 1719497 # 1719628 # 1 # ID=1_1682;partial=00;start_type=TTG;rbs_motif=GGAGG;rbs_spacer=5-10bp;gc_cont=0.508	SRVP_Atabeya-1_1682	SR-VP_11_27_2022_S1_100cm_MT	1	1719497	1719628	132	11625022	0.651677	-	-	-	-	-	-	-	-
SRVP_Atabeya-1-FCNFGDKI_16830	SRVP_Atabeya-1_1683 # 1719755 # 1721251 # -1 # ID=1_1683;partial=00;start_type=ATG;rbs_motif=3Base/5BMM;rbs_spacer=13-15bp;gc_cont=0.456	SRVP_Atabeya-1_1683	SR-VP_11_27_2022_S1_100cm_MT	2	1719755	1721251	1497	11625022	0.114925	-	-	-	-	COG1522	DNA-binding_transcriptional_regulator,_Lrp_family	K	-
SRVP_Atabeya-1-FCNFGDKI_16870	SRVP_Atabeya-1_1687 # 1723274 # 1724524 # 1 # ID=1_1687;partial=00;start_type=TTG;rbs_motif=None;rbs_spacer=None;gc_cont=0.511	SRVP_Atabeya-1_1687	SR-VP_11_27_2022_S1_100cm_MT	5	1723274	1724524	1251	11625022	0.34381	arCOG04741	-	Zn_finger_protein	S	COG2888	Predicted_RNA-binding_protein_involved_in_translation,_contains__Zn-ribbon_domain,_DUF1610_family	R	-
SRVP_Atabeya-1-FCNFGDKI_17010	SRVP_Atabeya-1_1701 # 1737173 # 1738033 # 1 # ID=1_1701;partial=00;start_type=ATG;rbs_motif=GGxGG;rbs_spacer=5-10bp;gc_cont=0.530	SRVP_Atabeya-1_1701	SR-VP_11_27_2022_S1_100cm_MT	1	1737173	1738033	861	11625022	0.0999086	arCOG00069	NadE	NH3-dependent_NAD+_synthetase	H	COG0171	NH3-dependent_NAD+_synthetase	H	NAD_biosynthesis
SRVP_Atabeya-1-FCNFGDKI_17060	SRVP_Atabeya-1_1706 # 1741165 # 1741947 # -1 # ID=1_1706;partial=00;start_type=GTG;rbs_motif=AGGAG/GGAGG;rbs_spacer=11-12bp;gc_cont=0.515	SRVP_Atabeya-1_1706	SR-VP_11_27_2022_S1_100cm_MT	2	1741165	1741947	783	11625022	0.219722	arCOG03995	-	Uncharacterized_protein	S	COG4894	Putative_phospholipid_scramblase_YxjI,_Tubby2_superfamily	I	-
SRVP_Atabeya-1-FCNFGDKI_17100	SRVP_Atabeya-1_1710 # 1745697 # 1746863 # 1 # ID=1_1710;partial=00;start_type=ATG;rbs_motif=GGAGG;rbs_spacer=5-10bp;gc_cont=0.521	SRVP_Atabeya-1_1710	SR-VP_11_27_2022_S1_100cm_MT	1	1745697	1746863	1167	11625022	0.0737115	arCOG01707	CaiA	Acyl-CoA_dehydrogenase	I	COG1960	Acyl-CoA_dehydrogenase_related_to_the_alkylation_response_protein_AidB	I	Fatty_acid_biosynthesis
SRVP_Atabeya-1-FCNFGDKI_17320	SRVP_Atabeya-1_1732 # 1764920 # 1766344 # 1 # ID=1_1732;partial=00;start_type=ATG;rbs_motif=GGxGG;rbs_spacer=3-4bp;gc_cont=0.505	SRVP_Atabeya-1_1732	SR-VP_11_27_2022_S1_100cm_MT	3	1764920	1766344	1425	11625022	0.181098	arCOG01474	MMT1	Predicted_Co/Zn/Cd_cation_transporter	P	COG0053	Divalent_metal_cation_(Fe/Co/Zn/Cd)_efflux_pump	P	-
SRVP_Atabeya-1-FCNFGDKI_17460	SRVP_Atabeya-1_1746 # 1779142 # 1779759 # -1 # ID=1_1746;partial=00;start_type=TTG;rbs_motif=GGA/GAG/AGG;rbs_spacer=5-10bp;gc_cont=0.492	SRVP_Atabeya-1_1746	SR-VP_11_27_2022_S1_100cm_MT	2	1779142	1779759	618	11625022	0.278386	arCOG03567	-	MEDS_sensory_domain,_inactived_KaiC-like_ATPase	T	COG0467	RecA-superfamily_ATPase,_KaiC/GvpD/RAD55_family	T	-
SRVP_Atabeya-1-FCNFGDKI_17470	SRVP_Atabeya-1_1747 # 1779892 # 1781469 # -1 # ID=1_1747;partial=00;start_type=ATG;rbs_motif=AGxAGG/AGGxGG;rbs_spacer=5-10bp;gc_cont=0.512	SRVP_Atabeya-1_1747	SR-VP_11_27_2022_S2_40cm_MT	1	1779892	1781469	1578	4025082	0.157441	arCOG00087	GuaA	GMP_synthase_-_Glutamine_amidotransferase_domain	F	COG0519	GMP_synthase,_PP-ATPase_domain/subunit	F	Purine_biosynthesis
SRVP_Atabeya-1-FCNFGDKI_17540	SRVP_Atabeya-1_1754 # 1785815 # 1786621 # -1 # ID=1_1754;partial=00;start_type=TTG;rbs_motif=AGGAGG;rbs_spacer=11-12bp;gc_cont=0.483	SRVP_Atabeya-1_1754	SR-VP_11_27_2022_S1_100cm_MT	1	1785815	1786621	807	11625022	0.106594	arCOG01648	MhpC	Alpha/beta_superfamily_hydrolase	R	COG0596	2-succinyl-6-hydroxy-2,4-cyclohexadiene-1-carboxylate_synthase_MenH_and_related_esterases,_alpha/beta_hydrolase_fold	HR	Menaquinone_biosynthesis
SRVP_Atabeya-1-FCNFGDKI_17610	SRVP_Atabeya-1_1761 # 1791373 # 1792563 # -1 # ID=1_1761;partial=00;start_type=ATG;rbs_motif=AGGA/GGAG/GAGG;rbs_spacer=11-12bp;gc_cont=0.505	SRVP_Atabeya-1_1761	SR-VP_11_27_2022_S1_100cm_MT	1	1791373	1792563	1191	11625022	0.0722261	arCOG00130	-	MFS_family_permease	G	COG2271	Sugar_phosphate_permease	G	-
SRVP_Atabeya-1-FCNFGDKI_17660	SRVP_Atabeya-1_1766 # 1795744 # 1796865 # 1 # ID=1_1766;partial=00;start_type=ATG;rbs_motif=AGGAGG;rbs_spacer=11-12bp;gc_cont=0.473	SRVP_Atabeya-1_1766	SR-VP_11_27_2022_S1_100cm_MT	1	1795744	1796865	1122	11625022	0.0766679	arCOG01890	AmpS	Leucyl_aminopeptidase_(aminopeptidase_T)	E	COG2309	Leucyl_aminopeptidase_(aminopeptidase_T)	E	-
SRVP_Atabeya-1-FCNFGDKI_17750	SRVP_Atabeya-1_1775 # 1803180 # 1803836 # 1 # ID=1_1775;partial=00;start_type=ATG;rbs_motif=GGAG/GAGG;rbs_spacer=5-10bp;gc_cont=0.534	SRVP_Atabeya-1_1775	SR-VP_11_27_2022_S1_100cm_MT	3	1803180	1803836	657	11625022	0.392792	arCOG02189	NapF	HTH_containing_ranscriptional_regulator_fused_to_ferredoxin_domain	C	COG2221	Dissimilatory_sulfite_reductase_(desulfoviridin),_alpha_and_beta_subunits	P	-
SRVP_Atabeya-1-FCNFGDKI_17760	SRVP_Atabeya-1_1776 # 1804005 # 1805666 # 1 # ID=1_1776;partial=00;start_type=TTG;rbs_motif=AGGAGG;rbs_spacer=5-10bp;gc_cont=0.511	SRVP_Atabeya-1_1776	SR-VP_11_27_2022_S1_100cm_MT	6	1804005	1805666	1662	11625022	0.310546	arCOG01999	-	Pyruvate_oxidase	G	COG0028	Acetolactate_synthase_large_subunit_or_other_thiamine_pyrophosphate-requiring_enzyme	EH	Isoleucine,_leucine,_valine_biosynthesis
SRVP_Atabeya-1-FCNFGDKI_17850	SRVP_Atabeya-1_1785 # 1813729 # 1815078 # -1 # ID=1_1785;partial=00;start_type=TTG;rbs_motif=GGA/GAG/AGG;rbs_spacer=11-12bp;gc_cont=0.458	SRVP_Atabeya-1_1785	SR-VP_11_27_2022_S1_80cm_MT	1	1813729	1815078	1350	4000856	0.185146	arCOG00146	MelB	Na+/melibiose_symporter_or_related_transporter	G	COG2211	Na+/melibiose_symporter_or_related_transporter	G	-
SRVP_Atabeya-1-FCNFGDKI_17910	SRVP_Atabeya-1_1791 # 1820079 # 1822130 # 1 # ID=1_1791;partial=00;start_type=TTG;rbs_motif=AGGAGG;rbs_spacer=5-10bp;gc_cont=0.530	SRVP_Atabeya-1_1791	SR-VP_11_27_2022_S1_80cm_MT	3	1820079	1822130	2052	4000856	0.365419	arCOG02235	HdrA	Heterodisulfide_reductase,_subunit_A_or_related_polyferredoxin	C	COG1145	Ferredoxin	C	-
SRVP_Atabeya-1-FCNFGDKI_17910	SRVP_Atabeya-1_1791 # 1820079 # 1822130 # 1 # ID=1_1791;partial=00;start_type=TTG;rbs_motif=AGGAGG;rbs_spacer=5-10bp;gc_cont=0.530	SRVP_Atabeya-1_1791	SR-VP_11_27_2022_S2_40cm_MT	1	1820079	1822130	2052	4025082	0.121073	arCOG02235	HdrA	Heterodisulfide_reductase,_subunit_A_or_related_polyferredoxin	C	COG1145	Ferredoxin	C	-
SRVP_Atabeya-1-FCNFGDKI_18030	SRVP_Atabeya-1_1803 # 1832532 # 1833239 # 1 # ID=1_1803;partial=00;start_type=GTG;rbs_motif=GGA/GAG/AGG;rbs_spacer=5-10bp;gc_cont=0.551	SRVP_Atabeya-1_1803	SR-VP_11_27_2022_S1_100cm_MT	10	1832532	1833239	708	11625022	1.21499	arCOG04741	-	Zn_finger_protein	S	COG2888	Predicted_RNA-binding_protein_involved_in_translation,_contains__Zn-ribbon_domain,_DUF1610_family	R	-
SRVP_Atabeya-1-FCNFGDKI_18070	SRVP_Atabeya-1_1807 # 1834522 # 1835622 # -1 # ID=1_1807;partial=00;start_type=TTG;rbs_motif=AGGAG/GGAGG;rbs_spacer=11-12bp;gc_cont=0.530	SRVP_Atabeya-1_1807	SR-VP_11_27_2022_S1_100cm_MT	9	1834522	1835622	1101	11625022	0.703172	arCOG02322	ResE	HAMP_domain	T	COG1511	Uncharacterized_membrane_protein_YhgE,_phage_infection_protein_(PIP)_family	S	-
SRVP_Atabeya-1-FCNFGDKI_18090	SRVP_Atabeya-1_1809 # 1836708 # 1838615 # 1 # ID=1_1809;partial=00;start_type=TTG;rbs_motif=AGGAG;rbs_spacer=5-10bp;gc_cont=0.497	SRVP_Atabeya-1_1809	SR-VP_11_27_2022_S1_100cm_MT	10	1836708	1838615	1908	11625022	0.450846	-	-	-	-	COG1913	Predicted_Zn-dependent_protease	R	-
SRVP_Atabeya-1-FCNFGDKI_18100	SRVP_Atabeya-1_1810 # 1838808 # 1841210 # 1 # ID=1_1810;partial=00;start_type=TTG;rbs_motif=GGA/GAG/AGG;rbs_spacer=5-10bp;gc_cont=0.504	SRVP_Atabeya-1_1810	SR-VP_11_27_2022_S1_100cm_MT	6	1838808	1841210	2403	11625022	0.214785	arCOG01578	MgtA	Cation_transport_ATPase	P	COG0474	Magnesium-transporting_ATPase_(P-type)	P	-
SRVP_Atabeya-1-FCNFGDKI_18190	SRVP_Atabeya-1_1819 # 1847646 # 1849712 # 1 # ID=1_1819;partial=00;start_type=ATG;rbs_motif=GGAGG;rbs_spacer=5-10bp;gc_cont=0.543	SRVP_Atabeya-1_1819	SR-VP_11_27_2022_S1_100cm_MT	26	1847646	1849712	2067	11625022	1.08203	arCOG01534	DdpA	ABC-type_transport_system,_periplasmic_component	E	COG0747	ABC-type_transport_system,_periplasmic_component	E	-
SRVP_Atabeya-1-FCNFGDKI_18230	SRVP_Atabeya-1_1823 # 1854055 # 1856856 # 1 # ID=1_1823;partial=00;start_type=ATG;rbs_motif=3Base/5BMM;rbs_spacer=13-15bp;gc_cont=0.536	SRVP_Atabeya-1_1823	SR-VP_11_27_2022_S1_100cm_MT	2	1854055	1856856	2802	11625022	0.0614	arCOG01534	DdpA	ABC-type_transport_system,_periplasmic_component	E	COG0747	ABC-type_transport_system,_periplasmic_component	E	-
SRVP_Atabeya-1-FCNFGDKI_18300	SRVP_Atabeya-1_1830 # 1863227 # 1863913 # -1 # ID=1_1830;partial=00;start_type=TTG;rbs_motif=AGGAGG;rbs_spacer=5-10bp;gc_cont=0.528	SRVP_Atabeya-1_1830	SR-VP_07_25_2022_A1_70cm_MT	1	1863227	1863913	687	125142	11.6316	arCOG10362	-	Uncharacterized_protein	S	-	-	-	-
SRVP_Atabeya-1-FCNFGDKI_18300	SRVP_Atabeya-1_1830 # 1863227 # 1863913 # -1 # ID=1_1830;partial=00;start_type=TTG;rbs_motif=AGGAGG;rbs_spacer=5-10bp;gc_cont=0.528	SRVP_Atabeya-1_1830	SR-VP_11_27_2022_S1_100cm_MT	1	1863227	1863913	687	11625022	0.125213	arCOG10362	-	Uncharacterized_protein	S	-	-	-	-
SRVP_Atabeya-1-FCNFGDKI_18500	SRVP_Atabeya-1_1850 # 1880838 # 1881884 # 1 # ID=1_1850;partial=00;start_type=TTG;rbs_motif=AGGA/GGAG/GAGG;rbs_spacer=11-12bp;gc_cont=0.499	SRVP_Atabeya-1_1850	SR-VP_11_27_2022_S1_100cm_MT	14	1880838	1881884	1047	11625022	1.15024	arCOG05128	NapF	Ferredoxin	C	COG1139	L-lactate_utilization_protein_LutB,_contains_a_ferredoxin-type_domain	C	-
SRVP_Atabeya-1-FCNFGDKI_18570	SRVP_Atabeya-1_1857 # 1887302 # 1888489 # 1 # ID=1_1857;partial=00;start_type=ATG;rbs_motif=GGxGG;rbs_spacer=11-12bp;gc_cont=0.483	SRVP_Atabeya-1_1857	SR-VP_11_27_2022_S1_100cm_MT	1	1887302	1888489	1188	11625022	0.0724085	arCOG00509	NorV	Flavorubredoxin	C	COG0426	Flavorubredoxin	C	-
SRVP_Atabeya-1-FCNFGDKI_18580	SRVP_Atabeya-1_1858 # 1888607 # 1890733 # -1 # ID=1_1858;partial=00;start_type=ATG;rbs_motif=GGA/GAG/AGG;rbs_spacer=5-10bp;gc_cont=0.504	SRVP_Atabeya-1_1858	SR-VP_11_27_2022_S1_100cm_MT	1	1888607	1890733	2127	11625022	0.0404426	arCOG02007	-	Prenyltransferase_family_protein_containing_thioredoxin_domain	O	COG1331	Uncharacterized_conserved_protein_YyaL,_SSP411_family,_contains_thoiredoxin_and_six-hairpin_glycosidase-like_domains	R	-
SRVP_Atabeya-1-FCNFGDKI_18590	SRVP_Atabeya-1_1859 # 1890765 # 1891532 # -1 # ID=1_1859;partial=00;start_type=TTG;rbs_motif=AGGAG/GGAGG;rbs_spacer=11-12bp;gc_cont=0.522	SRVP_Atabeya-1_1859	SR-VP_11_27_2022_S1_100cm_MT	1	1890765	1891532	768	11625022	0.112007	arCOG02714	CofE	F(420)-0:gamma-glutamyl_ligase,_F420_coenzyme_biosynthesis_enzyme	H	COG1478	F420-0:Gamma-glutamyl_ligase_(F420_biosynthesis)	H	-
SRVP_Atabeya-1-FCNFGDKI_18630	SRVP_Atabeya-1_1863 # 1893939 # 1894592 # 1 # ID=1_1863;partial=00;start_type=TTG;rbs_motif=GGAG/GAGG;rbs_spacer=5-10bp;gc_cont=0.506	SRVP_Atabeya-1_1863	SR-VP_07_25_2022_A4_70cm_MT	1	1893939	1894592	654	19546	78.2284	arCOG03124	-	Pentapeptide_repeats_containing_protein	S	COG5351	Uncharacterized_conserved_protein,_DUF2169_domain	S	-
SRVP_Atabeya-1-FCNFGDKI_18690	SRVP_Atabeya-1_1869 # 1901137 # 1901667 # -1 # ID=1_1869;partial=00;start_type=ATG;rbs_motif=GGAGG;rbs_spacer=5-10bp;gc_cont=0.484	SRVP_Atabeya-1_1869	SR-VP_11_27_2022_S1_100cm_MT	24	1901137	1901667	531	11625022	3.88797	-	-	-	-	-	-	-	-
SRVP_Atabeya-1-FCNFGDKI_18700	SRVP_Atabeya-1_1870 # 1902069 # 1902281 # 1 # ID=1_1870;partial=00;start_type=ATG;rbs_motif=GGAG/GAGG;rbs_spacer=5-10bp;gc_cont=0.446	SRVP_Atabeya-1_1870	SR-VP_11_27_2022_S1_100cm_MT	1	1902069	1902281	213	11625022	0.403856	-	-	-	-	-	-	-	-
SRVP_Atabeya-1-FCNFGDKI_18780	SRVP_Atabeya-1_1878 # 1908175 # 1908651 # -1 # ID=1_1878;partial=00;start_type=TTG;rbs_motif=GGAG/GAGG;rbs_spacer=5-10bp;gc_cont=0.509	SRVP_Atabeya-1_1878	SR-VP_11_27_2022_S1_100cm_MT	1	1908175	1908651	477	11625022	0.180338	-	-	-	-	-	-	-	-
SRVP_Atabeya-1-FCNFGDKI_18790	SRVP_Atabeya-1_1879 # 1908905 # 1910683 # -1 # ID=1_1879;partial=00;start_type=ATG;rbs_motif=AGGAG(G)/GGAGG;rbs_spacer=13-15bp;gc_cont=0.517	SRVP_Atabeya-1_1879	SR-VP_11_27_2022_S1_100cm_MT	318	1908905	1910683	1779	11625022	15.3765	arCOG03462	PotE	Amino_acid_transporter	E	COG0531	Serine_transporter_YbeC,_amino_acid:H+_symporter_family	E	-
SRVP_Atabeya-1-FCNFGDKI_18810	SRVP_Atabeya-1_1881 # 1912587 # 1913324 # -1 # ID=1_1881;partial=00;start_type=ATG;rbs_motif=GGA/GAG/AGG;rbs_spacer=5-10bp;gc_cont=0.499	SRVP_Atabeya-1_1881	SR-VP_11_27_2022_S1_100cm_MT	8	1912587	1913324	738	11625022	0.932481	arCOG06048	-	Predicted_nucleotidyltransferase	R	-	-	-	-
SRVP_Atabeya-1-FCNFGDKI_18830	SRVP_Atabeya-1_1883 # 1914432 # 1914632 # -1 # ID=1_1883;partial=00;start_type=ATG;rbs_motif=AGGAG(G)/GGAGG;rbs_spacer=13-15bp;gc_cont=0.552	SRVP_Atabeya-1_1883	SR-VP_07_25_2022_A4_70cm_MT	1	1914432	1914632	201	19546	254.534	-	-	-	-	-	-	-	-
SRVP_Atabeya-1-FCNFGDKI_18900	SRVP_Atabeya-1_1890 # 1921452 # 1922399 # 1 # ID=1_1890;partial=00;start_type=ATG;rbs_motif=GGxGG;rbs_spacer=11-12bp;gc_cont=0.540	SRVP_Atabeya-1_1890	SR-VP_11_27_2022_S1_100cm_MT	3	1921452	1922399	948	11625022	0.272219	-	-	-	-	-	-	-	-
SRVP_Atabeya-1-FCNFGDKI_19010	SRVP_Atabeya-1_1901 # 1934535 # 1936709 # -1 # ID=1_1901;partial=00;start_type=TTG;rbs_motif=GGAGG;rbs_spacer=5-10bp;gc_cont=0.555	SRVP_Atabeya-1_1901	SR-VP_11_27_2022_S1_100cm_MT	1	1934535	1936709	2175	11625022	0.03955	-	-	-	-	COG0613	5'-3'_exoribonuclease_TrpH/YciV_(RNase_AM),_contains_PHP_domain	F	-
SRVP_Atabeya-1-FCNFGDKI_19220	SRVP_Atabeya-1_1922 # 1950171 # 1950797 # -1 # ID=1_1922;partial=00;start_type=GTG;rbs_motif=4Base/6BMM;rbs_spacer=13-15bp;gc_cont=0.523	SRVP_Atabeya-1_1922	SR-VP_11_27_2022_S1_100cm_MT	1	1950171	1950797	627	11625022	0.137195	arCOG01158	SerB	Phosphoserine_phosphatase	E	COG0560	Phosphoserine_phosphatase	E	Serine_biosynthesis
SRVP_Atabeya-1-FCNFGDKI_19280	SRVP_Atabeya-1_1928 # 1955850 # 1956875 # 1 # ID=1_1928;partial=00;start_type=ATG;rbs_motif=None;rbs_spacer=None;gc_cont=0.565	SRVP_Atabeya-1_1928	SR-VP_11_27_2022_S1_100cm_MT	1	1955850	1956875	1026	11625022	0.0838415	arCOG00679	-	Transposable_element,_IS605_OrfB_family,_contains_RNAse_H_fold_nuclease_and_Zn_finger_domains	X	COG0675	Transposase	X	-
SRVP_Atabeya-1-FCNFGDKI_19450	SRVP_Atabeya-1_1945 # 1974921 # 1976114 # 1 # ID=1_1945;partial=00;start_type=GTG;rbs_motif=GGA/GAG/AGG;rbs_spacer=5-10bp;gc_cont=0.539	SRVP_Atabeya-1_1945	SR-VP_11_27_2022_S1_100cm_MT	1	1974921	1976114	1194	11625022	0.0720447	-	-	-	-	COG4257	Streptogramin_lyase	V	-
SRVP_Atabeya-1-FCNFGDKI_19520	SRVP_Atabeya-1_1952 # 1983124 # 1984686 # 1 # ID=1_1952;partial=00;start_type=ATG;rbs_motif=GGAG/GAGG;rbs_spacer=5-10bp;gc_cont=0.482	SRVP_Atabeya-1_1952	SR-VP_11_27_2022_S1_100cm_MT	11	1983124	1984686	1563	11625022	0.605397	arCOG00280	-	HerA_helicase	L	COG0433	Archaeal_DNA_helicase_HerA_or_a_related_bacterial_ATPase,_contains_HAS-barrel_and_ATPase_domains	L	-
SRVP_Atabeya-1-FCNFGDKI_19580	SRVP_Atabeya-1_1958 # 1988646 # 1990103 # 1 # ID=1_1958;partial=00;start_type=TTG;rbs_motif=None;rbs_spacer=None;gc_cont=0.527	SRVP_Atabeya-1_1958	SR-VP_11_27_2022_S1_100cm_MT	11	1988646	1990103	1458	11625022	0.648995	arCOG00280	-	HerA_helicase	L	COG0433	Archaeal_DNA_helicase_HerA_or_a_related_bacterial_ATPase,_contains_HAS-barrel_and_ATPase_domains	L	-
SRVP_Atabeya-1-FCNFGDKI_19590	SRVP_Atabeya-1_1959 # 1990533 # 1991966 # -1 # ID=1_1959;partial=00;start_type=ATG;rbs_motif=AGGAG(G)/GGAGG;rbs_spacer=13-15bp;gc_cont=0.512	SRVP_Atabeya-1_1959	SR-VP_11_27_2022_S1_100cm_MT	38	1990533	1991966	1434	11625022	2.27951	-	-	-	-	COG4257	Streptogramin_lyase	V	-
SRVP_Atabeya-1-FCNFGDKI_19750	SRVP_Atabeya-1_1975 # 2006626 # 2007423 # -1 # ID=1_1975;partial=00;start_type=TTG;rbs_motif=3Base/5BMM;rbs_spacer=13-15bp;gc_cont=0.486	SRVP_Atabeya-1_1975	SR-VP_11_27_2022_S1_100cm_MT	1	2006626	2007423	798	11625022	0.107796	-	-	-	-	-	-	-	-
SRVP_Atabeya-1-FCNFGDKI_19760	SRVP_Atabeya-1_1976 # 2007434 # 2007928 # -1 # ID=1_1976;partial=00;start_type=TTG;rbs_motif=GGA/GAG/AGG;rbs_spacer=5-10bp;gc_cont=0.434	SRVP_Atabeya-1_1976	SR-VP_11_27_2022_S1_100cm_MT	1	2007434	2007928	495	11625022	0.17378	-	-	-	-	-	-	-	-
SRVP_Atabeya-1-FCNFGDKI_19860	SRVP_Atabeya-1_1986 # 2018838 # 2019341 # 1 # ID=1_1986;partial=00;start_type=GTG;rbs_motif=AGGA/GGAG/GAGG;rbs_spacer=11-12bp;gc_cont=0.569	SRVP_Atabeya-1_1986	SR-VP_11_27_2022_S1_100cm_MT	1	2018838	2019341	504	11625022	0.170677	-	-	-	-	-	-	-	-
SRVP_Atabeya-1-FCNFGDKI_19870	SRVP_Atabeya-1_1987 # 2019338 # 2019946 # 1 # ID=1_1987;partial=00;start_type=GTG;rbs_motif=AGGA/GGAG/GAGG;rbs_spacer=11-12bp;gc_cont=0.550	SRVP_Atabeya-1_1987	SR-VP_11_27_2022_S1_100cm_MT	5	2019338	2019946	609	11625022	0.706251	-	-	-	-	-	-	-	-
SRVP_Atabeya-1-FCNFGDKI_19900	SRVP_Atabeya-1_1990 # 2022637 # 2023755 # 1 # ID=1_1990;partial=00;start_type=ATG;rbs_motif=GGAG/GAGG;rbs_spacer=5-10bp;gc_cont=0.525	SRVP_Atabeya-1_1990	SR-VP_11_27_2022_S1_100cm_MT	1	2022637	2023755	1119	11625022	0.0768734	arCOG02189	NapF	HTH_containing_ranscriptional_regulator_fused_to_ferredoxin_domain	C	COG2768	Uncharacterized_Fe-S_cluster_protein	S	-
SRVP_Atabeya-1-FCNFGDKI_19950	SRVP_Atabeya-1_1995 # 2025960 # 2026811 # 1 # ID=1_1995;partial=00;start_type=ATG;rbs_motif=3Base/5BMM;rbs_spacer=13-15bp;gc_cont=0.549	SRVP_Atabeya-1_1995	SR-VP_11_27_2022_S1_100cm_MT	2	2025960	2026811	852	11625022	0.201928	-	-	-	-	COG2888	Predicted_RNA-binding_protein_involved_in_translation,_contains__Zn-ribbon_domain,_DUF1610_family	R	-
SRVP_Atabeya-1-FCNFGDKI_19970	SRVP_Atabeya-1_1997 # 2028385 # 2029764 # -1 # ID=1_1997;partial=00;start_type=ATG;rbs_motif=GGA/GAG/AGG;rbs_spacer=5-10bp;gc_cont=0.599	SRVP_Atabeya-1_1997	SR-VP_11_27_2022_S1_100cm_MT	4	2028385	2029764	1380	11625022	0.249337	arCOG04741	-	Zn_finger_protein	S	COG2888	Predicted_RNA-binding_protein_involved_in_translation,_contains__Zn-ribbon_domain,_DUF1610_family	R	-
SRVP_Atabeya-1-FCNFGDKI_20050	SRVP_Atabeya-1_2005 # 2036166 # 2037776 # -1 # ID=1_2005;partial=00;start_type=TTG;rbs_motif=GGA/GAG/AGG;rbs_spacer=5-10bp;gc_cont=0.538	SRVP_Atabeya-1_2005	SR-VP_11_27_2022_S1_100cm_MT	2	2036166	2037776	1611	11625022	0.106792	-	-	-	-	-	-	-	-
SRVP_Atabeya-1-FCNFGDKI_20100	SRVP_Atabeya-1_2010 # 2042958 # 2043572 # -1 # ID=1_2010;partial=00;start_type=TTG;rbs_motif=AGGAGG;rbs_spacer=5-10bp;gc_cont=0.481	SRVP_Atabeya-1_2010	SR-VP_11_27_2022_S1_100cm_MT	1	2042958	2043572	615	11625022	0.139872	arCOG04147	SodA	Superoxide_dismutase	P	COG0605	Superoxide_dismutase	P	-
SRVP_Atabeya-1-FCNFGDKI_20110	SRVP_Atabeya-1_2011 # 2043856 # 2044305 # -1 # ID=1_2011;partial=00;start_type=TTG;rbs_motif=AGGAGG;rbs_spacer=5-10bp;gc_cont=0.476	SRVP_Atabeya-1_2011	SR-VP_11_27_2022_S1_100cm_MT	1	2043856	2044305	450	11625022	0.191159	arCOG01094	Bfr	Bacterioferritin_(cytochrome_b1)	P	COG2193	Bacterioferritin_(cytochrome_b1)	P	-
SRVP_Atabeya-1-FCNFGDKI_20120	SRVP_Atabeya-1_2012 # 2044606 # 2045961 # 1 # ID=1_2012;partial=00;start_type=ATG;rbs_motif=AGxAGG/AGGxGG;rbs_spacer=11-12bp;gc_cont=0.507	SRVP_Atabeya-1_2012	SR-VP_07_25_2022_A4_70cm_MT	1	2044606	2045961	1356	19546	37.7296	arCOG00238	ArsB	Na+/H+_antiporter_NhaD_or_related_arsenite_permease	P	COG1055	Na+/H+_antiporter_NhaD_or_related_arsenite_permease	P	-
SRVP_Atabeya-1-FCNFGDKI_20160	SRVP_Atabeya-1_2016 # 2049615 # 2050319 # 1 # ID=1_2016;partial=00;start_type=TTG;rbs_motif=GGxGG;rbs_spacer=5-10bp;gc_cont=0.505	SRVP_Atabeya-1_2016	SR-VP_11_27_2022_S1_100cm_MT	2	2049615	2050319	705	11625022	0.244032	-	-	-	-	-	-	-	-
SRVP_Atabeya-1-FCNFGDKI_20180	SRVP_Atabeya-1_2018 # 2051711 # 2053141 # 1 # ID=1_2018;partial=00;start_type=ATG;rbs_motif=AGxAGG/AGGxGG;rbs_spacer=5-10bp;gc_cont=0.530	SRVP_Atabeya-1_2018	SR-VP_11_27_2022_S1_100cm_MT	5	2051711	2053141	1431	11625022	0.300564	arCOG01171	KaiC	KaiC_family_ATPase_implicated_in_signal_transduction	T	COG0467	RecA-superfamily_ATPase,_KaiC/GvpD/RAD55_family	T	-
SRVP_Atabeya-1-FCNFGDKI_20200	SRVP_Atabeya-1_2020 # 2054429 # 2055265 # -1 # ID=1_2020;partial=00;start_type=TTG;rbs_motif=AGxAGG/AGGxGG;rbs_spacer=5-10bp;gc_cont=0.545	SRVP_Atabeya-1_2020	SR-VP_11_27_2022_S1_100cm_MT	1	2054429	2055265	837	11625022	0.102773	arCOG10362	-	Uncharacterized_protein	S	COG2888	Predicted_RNA-binding_protein_involved_in_translation,_contains__Zn-ribbon_domain,_DUF1610_family	R	-
SRVP_Atabeya-1-FCNFGDKI_20280	SRVP_Atabeya-1_2028 # 2060721 # 2061548 # 1 # ID=1_2028;partial=00;start_type=ATG;rbs_motif=GGAG/GAGG;rbs_spacer=5-10bp;gc_cont=0.522	SRVP_Atabeya-1_2028	SR-VP_11_27_2022_S1_100cm_MT	8	2060721	2061548	828	11625022	0.831124	-	-	-	-	-	-	-	-
SRVP_Atabeya-1-FCNFGDKI_20300	SRVP_Atabeya-1_2030 # 2062038 # 2063093 # -1 # ID=1_2030;partial=00;start_type=ATG;rbs_motif=AGGAG;rbs_spacer=3-4bp;gc_cont=0.525	SRVP_Atabeya-1_2030	SR-VP_11_27_2022_S1_100cm_MT	1	2062038	2063093	1056	11625022	0.0814596	arCOG02447	-	Uncharacterized_protein	S	COG2006	Uncharacterized_conserved_protein,_DUF362_family	S	-
SRVP_Atabeya-1-FCNFGDKI_20310	SRVP_Atabeya-1_2031 # 2063328 # 2065766 # 1 # ID=1_2031;partial=00;start_type=ATG;rbs_motif=AGGAGG;rbs_spacer=5-10bp;gc_cont=0.523	SRVP_Atabeya-1_2031	SR-VP_11_27_2022_S1_100cm_MT	2	2063328	2065766	2439	11625022	0.0705382	arCOG02160	LonB	Predicted_ATP-dependent_protease	O	COG1067	Predicted_ATP-dependent_protease	O	-
SRVP_Atabeya-1-FCNFGDKI_20330	SRVP_Atabeya-1_2033 # 2066232 # 2067149 # 1 # ID=1_2033;partial=00;start_type=GTG;rbs_motif=GGA/GAG/AGG;rbs_spacer=5-10bp;gc_cont=0.509	SRVP_Atabeya-1_2033	SR-VP_11_27_2022_S2_40cm_MT	1	2066232	2067149	918	4025082	0.270634	-	-	-	-	-	-	-	-
SRVP_Atabeya-1-FCNFGDKI_20430	SRVP_Atabeya-1_2043 # 2075411 # 2076640 # 1 # ID=1_2043;partial=00;start_type=ATG;rbs_motif=AGGAG/GGAGG;rbs_spacer=11-12bp;gc_cont=0.504	SRVP_Atabeya-1_2043	SR-VP_11_27_2022_S1_100cm_MT	5	2075411	2076640	1230	11625022	0.34968	arCOG00130	-	MFS_family_permease	G	COG2271	Sugar_phosphate_permease	G	-
SRVP_Atabeya-1-FCNFGDKI_20440	SRVP_Atabeya-1_2044 # 2076814 # 2078016 # -1 # ID=1_2044;partial=00;start_type=ATG;rbs_motif=GGAGG;rbs_spacer=5-10bp;gc_cont=0.530	SRVP_Atabeya-1_2044	SR-VP_11_27_2022_S1_100cm_MT	2	2076814	2078016	1203	11625022	0.143011	arCOG02448	-	Uncharacterized_Fe-S_center_protein	R	COG2006	Uncharacterized_conserved_protein,_DUF362_family	S	-
SRVP_Atabeya-1-FCNFGDKI_20500	SRVP_Atabeya-1_2050 # 2083250 # 2084065 # 1 # ID=1_2050;partial=00;start_type=GTG;rbs_motif=GGA/GAG/AGG;rbs_spacer=5-10bp;gc_cont=0.500	SRVP_Atabeya-1_2050	SR-VP_11_27_2022_S1_100cm_MT	2	2083250	2084065	816	11625022	0.210837	arCOG06151	-	Alkylhydroperoxidase_family_enzyme	P	COG1695	DNA-binding_transcriptional_regulator,_PadR_family	K	-
SRVP_Atabeya-1-FCNFGDKI_20510	SRVP_Atabeya-1_2051 # 2084094 # 2084312 # 1 # ID=1_2051;partial=00;start_type=ATG;rbs_motif=GGAGG;rbs_spacer=5-10bp;gc_cont=0.502	SRVP_Atabeya-1_2051	SR-VP_11_27_2022_S1_100cm_MT	4	2084094	2084312	219	11625022	1.57117	arCOG11398	-	Peptidase_family_C39	E	-	-	-	-
SRVP_Atabeya-1-FCNFGDKI_20520	SRVP_Atabeya-1_2052 # 2084322 # 2084573 # 1 # ID=1_2052;partial=00;start_type=ATG;rbs_motif=AGxAGG/AGGxGG;rbs_spacer=5-10bp;gc_cont=0.556	SRVP_Atabeya-1_2052	SR-VP_11_27_2022_S1_100cm_MT	2	2084322	2084573	252	11625022	0.682709	-	-	-	-	-	-	-	-
SRVP_Atabeya-1-FCNFGDKI_20590	SRVP_Atabeya-1_2059 # 2088609 # 2089421 # -1 # ID=1_2059;partial=00;start_type=ATG;rbs_motif=AGxAGG/AGGxGG;rbs_spacer=5-10bp;gc_cont=0.523	SRVP_Atabeya-1_2059	SR-VP_11_27_2022_S1_100cm_MT	6	2088609	2089421	813	11625022	0.634844	-	-	-	-	COG2223	Nitrate/nitrite_transporter_NarK	P	-
SRVP_Atabeya-1-FCNFGDKI_20700	SRVP_Atabeya-1_2070 # 2101214 # 2101744 # -1 # ID=1_2070;partial=00;start_type=GTG;rbs_motif=4Base/6BMM;rbs_spacer=13-15bp;gc_cont=0.490	SRVP_Atabeya-1_2070	SR-VP_11_27_2022_S1_100cm_MT	3	2101214	2101744	531	11625022	0.485996	-	-	-	-	-	-	-	-
SRVP_Atabeya-1-FCNFGDKI_20710	SRVP_Atabeya-1_2071 # 2101769 # 2101936 # -1 # ID=1_2071;partial=00;start_type=TTG;rbs_motif=GGxGG;rbs_spacer=5-10bp;gc_cont=0.464	SRVP_Atabeya-1_2071	SR-VP_11_27_2022_S1_100cm_MT	3	2101769	2101936	168	11625022	1.5361	-	-	-	-	-	-	-	-
SRVP_Atabeya-1-FCNFGDKI_20730	SRVP_Atabeya-1_2073 # 2103963 # 2105159 # -1 # ID=1_2073;partial=00;start_type=ATG;rbs_motif=GGA/GAG/AGG;rbs_spacer=5-10bp;gc_cont=0.526	SRVP_Atabeya-1_2073	SR-VP_11_27_2022_S1_100cm_MT	1	2103963	2105159	1197	11625022	0.0718641	arCOG00287	-	NurA_5-3_nuclease	L	COG1630	ssDNA_and_dsDNA_5'-3'_nuclease_NurA,_repair_of_double-stranded_DNA_breaks	L	-
SRVP_Atabeya-1-FCNFGDKI_20740	SRVP_Atabeya-1_2074 # 2105244 # 2106257 # -1 # ID=1_2074;partial=00;start_type=ATG;rbs_motif=AGxAGG/AGGxGG;rbs_spacer=5-10bp;gc_cont=0.544	SRVP_Atabeya-1_2074	SR-VP_11_27_2022_S1_100cm_MT	3	2105244	2106257	1014	11625022	0.254501	-	-	-	-	-	-	-	-
SRVP_Atabeya-1-FCNFGDKI_20830	SRVP_Atabeya-1_2083 # 2113624 # 2115138 # -1 # ID=1_2083;partial=00;start_type=ATG;rbs_motif=AGGAG(G)/GGAGG;rbs_spacer=13-15bp;gc_cont=0.501	SRVP_Atabeya-1_2083	SR-VP_11_27_2022_S1_100cm_MT	2	2113624	2115138	1515	11625022	0.11356	-	-	-	-	-	-	-	-
SRVP_Atabeya-1-FCNFGDKI_20880	SRVP_Atabeya-1_2088 # 2118557 # 2118877 # 1 # ID=1_2088;partial=00;start_type=GTG;rbs_motif=AGGA/GGAG/GAGG;rbs_spacer=11-12bp;gc_cont=0.530	SRVP_Atabeya-1_2088	SR-VP_11_27_2022_S1_100cm_MT	4	2118557	2118877	321	11625022	1.07192	-	-	-	-	COG3428	Uncharacterized_membrane_protein_YdbT,_contains_bPH2_(bacterial_pleckstrin_homology)_domain	S	-
SRVP_Atabeya-1-FCNFGDKI_20930	SRVP_Atabeya-1_2093 # 2124557 # 2125210 # -1 # ID=1_2093;partial=00;start_type=GTG;rbs_motif=GGAGG;rbs_spacer=5-10bp;gc_cont=0.506	SRVP_Atabeya-1_2093	SR-VP_11_27_2022_S1_100cm_MT	1	2124557	2125210	654	11625022	0.131531	-	-	-	-	-	-	-	-
SRVP_Atabeya-1-FCNFGDKI_21000	SRVP_Atabeya-1_2100 # 2130556 # 2133234 # 1 # ID=1_2100;partial=00;start_type=GTG;rbs_motif=GGAG/GAGG;rbs_spacer=5-10bp;gc_cont=0.515	SRVP_Atabeya-1_2100	SR-VP_11_27_2022_S1_100cm_MT	9	2130556	2133234	2679	11625022	0.288985	arCOG04082	PvdQ	Acyl-homoserine_lactone_(AHL)_acylase_PvdQ	Q	COG2366	Acyl-homoserine_lactone_(AHL)_acylase_PvdQ	Q	-
SRVP_Atabeya-1-FCNFGDKI_21080	SRVP_Atabeya-1_2108 # 2138550 # 2141114 # -1 # ID=1_2108;partial=00;start_type=TTG;rbs_motif=GGAGG;rbs_spacer=5-10bp;gc_cont=0.498	SRVP_Atabeya-1_2108	SR-VP_11_27_2022_S1_100cm_MT	3	2138550	2141114	2565	11625022	0.10061	arCOG01578	MgtA	Cation_transport_ATPase	P	COG0474	Magnesium-transporting_ATPase_(P-type)	P	-
SRVP_Atabeya-1-FCNFGDKI_21090	SRVP_Atabeya-1_2109 # 2141245 # 2141460 # 1 # ID=1_2109;partial=00;start_type=TTG;rbs_motif=GGAG/GAGG;rbs_spacer=5-10bp;gc_cont=0.491	SRVP_Atabeya-1_2109	SR-VP_11_27_2022_S1_100cm_MT	1	2141245	2141460	216	11625022	0.398247	-	-	-	-	-	-	-	-
SRVP_Atabeya-1-FCNFGDKI_21130	SRVP_Atabeya-1_2113 # 2143842 # 2145773 # -1 # ID=1_2113;partial=00;start_type=GTG;rbs_motif=AGGAG;rbs_spacer=5-10bp;gc_cont=0.494	SRVP_Atabeya-1_2113	SR-VP_11_27_2022_S1_100cm_MT	9	2143842	2145773	1932	11625022	0.400721	arCOG01151	-	Calcineurin_family_phosphoesterase	R	COG2908	UDP-2,3-diacylglucosamine_pyrophosphatase_LpxH	M	-
SRVP_Atabeya-1-FCNFGDKI_21350	SRVP_Atabeya-1_2135 # 2167417 # 2168991 # 1 # ID=1_2135;partial=00;start_type=ATG;rbs_motif=GGA/GAG/AGG;rbs_spacer=11-12bp;gc_cont=0.517	SRVP_Atabeya-1_2135	SR-VP_11_27_2022_S1_100cm_MT	2	2167417	2168991	1575	11625022	0.109233	-	-	-	-	COG0702	Uncharacterized_conserved_protein_YbjT,_contains_NAD(P)-binding_and_DUF2867_domains	R	-
SRVP_Atabeya-1-FCNFGDKI_21480	SRVP_Atabeya-1_2148 # 2177190 # 2178005 # -1 # ID=1_2148;partial=00;start_type=TTG;rbs_motif=AGGAGG;rbs_spacer=5-10bp;gc_cont=0.544	SRVP_Atabeya-1_2148	SR-VP_11_27_2022_S1_100cm_MT	6	2177190	2178005	816	11625022	0.63251	-	-	-	-	-	-	-	-
SRVP_Atabeya-1-FCNFGDKI_21500	SRVP_Atabeya-1_2150 # 2180714 # 2181547 # 1 # ID=1_2150;partial=00;start_type=ATG;rbs_motif=GGAG/GAGG;rbs_spacer=5-10bp;gc_cont=0.517	SRVP_Atabeya-1_2150	SR-VP_11_27_2022_S1_100cm_MT	1	2180714	2181547	834	11625022	0.103143	arCOG01730	-	Aromatic_ring-opening_dioxygenase,_catalytic_LigB_subunit_related_enzyme	Q	COG3384	Aromatic_ring-opening_dioxygenase,_catalytic_subunit,_LigB_family	Q	-
SRVP_Atabeya-1-FCNFGDKI_21540	SRVP_Atabeya-1_2154 # 2183649 # 2184530 # 1 # ID=1_2154;partial=00;start_type=TTG;rbs_motif=GGA/GAG/AGG;rbs_spacer=11-12bp;gc_cont=0.477	SRVP_Atabeya-1_2154	SR-VP_11_27_2022_S1_100cm_MT	1	2183649	2184530	882	11625022	0.0975299	arCOG00504	-	Metal-dependent_hydrolase_of_the_beta-lactamase_superfamily_II	R	COG0491	Glyoxylase_or_a_related_metal-dependent_hydrolase,_beta-lactamase_superfamily_II	R	-
SRVP_Atabeya-1-FCNFGDKI_21560	SRVP_Atabeya-1_2156 # 2185836 # 2187515 # 1 # ID=1_2156;partial=00;start_type=TTG;rbs_motif=AGGAG/GGAGG;rbs_spacer=11-12bp;gc_cont=0.507	SRVP_Atabeya-1_2156	SR-VP_11_27_2022_S1_100cm_MT	13	2185836	2187515	1680	11625022	0.665641	-	-	-	-	-	-	-	-
SRVP_Atabeya-1-FCNFGDKI_21570	SRVP_Atabeya-1_2157 # 2187779 # 2188792 # -1 # ID=1_2157;partial=00;start_type=ATG;rbs_motif=AGGA/GGAG/GAGG;rbs_spacer=11-12bp;gc_cont=0.478	SRVP_Atabeya-1_2157	SR-VP_11_27_2022_S1_100cm_MT	2	2187779	2188792	1014	11625022	0.169667	-	-	-	-	COG1575	1,4-dihydroxy-2-naphthoate_polyprenyltransferase	H	Menaquinone_biosynthesis
SRVP_Atabeya-1-FCNFGDKI_21620	SRVP_Atabeya-1_2162 # 2193013 # 2193645 # -1 # ID=1_2162;partial=00;start_type=ATG;rbs_motif=AGGAGG;rbs_spacer=5-10bp;gc_cont=0.457	SRVP_Atabeya-1_2162	SR-VP_11_27_2022_S1_100cm_MT	12	2193013	2193645	633	11625022	1.63074	arCOG02008	-	Uncharacterized_membrane_protein,_a_putative_transporter_component	R	COG3371	Uncharacterized_membrane_protein	S	-
SRVP_Atabeya-1-FCNFGDKI_21710	SRVP_Atabeya-1_2171 # 2203967 # 2205502 # -1 # ID=1_2171;partial=00;start_type=ATG;rbs_motif=GGxGG;rbs_spacer=5-10bp;gc_cont=0.525	SRVP_Atabeya-1_2171	SR-VP_11_27_2022_S1_100cm_MT	3	2203967	2205502	1536	11625022	0.16801	arCOG01707	CaiA	Acyl-CoA_dehydrogenase	I	COG1960	Acyl-CoA_dehydrogenase_related_to_the_alkylation_response_protein_AidB	I	Fatty_acid_biosynthesis
SRVP_Atabeya-1-FCNFGDKI_21710	SRVP_Atabeya-1_2171 # 2203967 # 2205502 # -1 # ID=1_2171;partial=00;start_type=ATG;rbs_motif=GGxGG;rbs_spacer=5-10bp;gc_cont=0.525	SRVP_Atabeya-1_2171	SR-VP_11_27_2022_S1_40cm_MT	1	2203967	2205502	1536	1473124	0.441946	arCOG01707	CaiA	Acyl-CoA_dehydrogenase	I	COG1960	Acyl-CoA_dehydrogenase_related_to_the_alkylation_response_protein_AidB	I	Fatty_acid_biosynthesis
SRVP_Atabeya-1-FCNFGDKI_21730	SRVP_Atabeya-1_2173 # 2206598 # 2208073 # -1 # ID=1_2173;partial=00;start_type=ATG;rbs_motif=GGA/GAG/AGG;rbs_spacer=11-12bp;gc_cont=0.501	SRVP_Atabeya-1_2173	SR-VP_11_27_2022_S1_100cm_MT	2	2206598	2208073	1476	11625022	0.11656	-	-	-	-	-	-	-	-
SRVP_Atabeya-1-FCNFGDKI_21790	SRVP_Atabeya-1_2179 # 2212287 # 2212832 # 1 # ID=1_2179;partial=00;start_type=ATG;rbs_motif=GGAG/GAGG;rbs_spacer=5-10bp;gc_cont=0.520	SRVP_Atabeya-1_2179	SR-VP_11_27_2022_S1_100cm_MT	11	2212287	2212832	546	11625022	1.73303	-	-	-	-	-	-	-	-
SRVP_Atabeya-1-FCNFGDKI_21820	SRVP_Atabeya-1_2182 # 2214159 # 2214698 # 1 # ID=1_2182;partial=00;start_type=ATG;rbs_motif=GGAG/GAGG;rbs_spacer=5-10bp;gc_cont=0.485	SRVP_Atabeya-1_2182	SR-VP_11_27_2022_S1_100cm_MT	20	2214159	2214698	540	11625022	3.18598	-	-	-	-	-	-	-	-
SRVP_Atabeya-1-FCNFGDKI_21840	SRVP_Atabeya-1_2184 # 2215775 # 2217091 # 1 # ID=1_2184;partial=00;start_type=ATG;rbs_motif=GGAGG;rbs_spacer=5-10bp;gc_cont=0.529	SRVP_Atabeya-1_2184	SR-VP_11_27_2022_S1_100cm_MT	2	2215775	2217091	1317	11625022	0.130632	arCOG00407	AsnS	Aspartyl/asparaginyl-tRNA_synthetase	J	COG0017	Aspartyl/asparaginyl-tRNA_synthetase	J	Aminoacyl-tRNA_synthetases
SRVP_Atabeya-1-FCNFGDKI_22000	SRVP_Atabeya-1_2201 # 2235023 # 2236630 # 1 # ID=1_2201;partial=00;start_type=TTG;rbs_motif=GGxGG;rbs_spacer=5-10bp;gc_cont=0.512	SRVP_Atabeya-1_2201	SR-VP_11_27_2022_S1_100cm_MT	8	2235023	2236630	1608	11625022	0.427967	arCOG01171	KaiC	KaiC_family_ATPase_implicated_in_signal_transduction	T	COG0467	RecA-superfamily_ATPase,_KaiC/GvpD/RAD55_family	T	-
SRVP_Atabeya-1-FCNFGDKI_22140	SRVP_Atabeya-1_2215 # 2247461 # 2249101 # 1 # ID=1_2215;partial=00;start_type=ATG;rbs_motif=GGA/GAG/AGG;rbs_spacer=5-10bp;gc_cont=0.523	SRVP_Atabeya-1_2215	SR-VP_11_27_2022_S1_100cm_MT	3	2247461	2249101	1641	11625022	0.15726	arCOG01357	-	Radical_SAM_superfamily_enzyme	C	COG1032	Radical_SAM_superfamily_enzyme_YgiQ,_UPF0313_family	R	-
SRVP_Atabeya-1-FCNFGDKI_22170	SRVP_Atabeya-1_2218 # 2251547 # 2252233 # -1 # ID=1_2218;partial=00;start_type=ATG;rbs_motif=3Base/5BMM;rbs_spacer=13-15bp;gc_cont=0.479	SRVP_Atabeya-1_2218	SR-VP_07_25_2022_A1_70cm_MT	2	2251547	2252233	687	125142	23.2632	-	-	-	-	-	-	-	-
SRVP_Atabeya-1-FCNFGDKI_22230	SRVP_Atabeya-1_2224 # 2257913 # 2259262 # 1 # ID=1_2224;partial=00;start_type=ATG;rbs_motif=None;rbs_spacer=None;gc_cont=0.515	SRVP_Atabeya-1_2224	SR-VP_11_27_2022_S1_100cm_MT	5	2257913	2259262	1350	11625022	0.318598	arCOG00915	GabT	4-aminobutyrate_aminotransferase_or_related_aminotransferase	E	COG0160	Acetylornithine_aminotransferase/4-aminobutyrate_aminotransferase	E	Arginine_biosynthesis
SRVP_Atabeya-1-FCNFGDKI_22280	SRVP_Atabeya-1_2229 # 2262672 # 2264087 # -1 # ID=1_2229;partial=00;start_type=TTG;rbs_motif=AGGAGG;rbs_spacer=11-12bp;gc_cont=0.521	SRVP_Atabeya-1_2229	SR-VP_11_27_2022_S1_100cm_MT	3	2262672	2264087	1416	11625022	0.182249	arCOG01717	GatA	Asp-tRNAAsn/Glu-tRNAGln_amidotransferase_A_subunit_or_related_amidase	J	COG0154	Asp-tRNAAsn/Glu-tRNAGln_amidotransferase_A_subunit_or_related_amidase	J	Aminoacyl-tRNA_synthetases
SRVP_Atabeya-1-FCNFGDKI_22350	SRVP_Atabeya-1_2236 # 2272218 # 2272568 # -1 # ID=1_2236;partial=00;start_type=ATG;rbs_motif=AGxAGG/AGGxGG;rbs_spacer=5-10bp;gc_cont=0.499	SRVP_Atabeya-1_2236	SR-VP_11_27_2022_S1_100cm_MT	3	2272218	2272568	351	11625022	0.735225	-	-	-	-	-	-	-	-
SRVP_Atabeya-1-FCNFGDKI_22360	SRVP_Atabeya-1_2237 # 2272731 # 2274758 # -1 # ID=1_2237;partial=00;start_type=TTG;rbs_motif=AGxAG;rbs_spacer=5-10bp;gc_cont=0.530	SRVP_Atabeya-1_2237	SR-VP_11_27_2022_S1_100cm_MT	1808	2272731	2274758	2028	11625022	76.6896	arCOG01534	DdpA	ABC-type_transport_system,_periplasmic_component	E	COG0747	ABC-type_transport_system,_periplasmic_component	E	-
SRVP_Atabeya-1-FCNFGDKI_22370	SRVP_Atabeya-1_2238 # 2275207 # 2276181 # 1 # ID=1_2238;partial=00;start_type=GTG;rbs_motif=GGA/GAG/AGG;rbs_spacer=5-10bp;gc_cont=0.506	SRVP_Atabeya-1_2238	SR-VP_11_27_2022_S1_100cm_MT	7	2275207	2276181	975	11625022	0.617589	arCOG00751	DppB	ABC-type_dipeptide/oligopeptide/nickel_transport_system,_permease_component	E	COG0601	ABC-type_dipeptide/oligopeptide/nickel_transport_system,_permease_component	EP	-
SRVP_Atabeya-1-FCNFGDKI_22380	SRVP_Atabeya-1_2239 # 2276209 # 2277213 # 1 # ID=1_2239;partial=00;start_type=GTG;rbs_motif=GGA/GAG/AGG;rbs_spacer=5-10bp;gc_cont=0.523	SRVP_Atabeya-1_2239	SR-VP_11_27_2022_S1_100cm_MT	2	2276209	2277213	1005	11625022	0.171187	arCOG00748	DppC	ABC-type_dipeptide/oligopeptide/nickel_transport_system,_permease_component	E	COG1173	ABC-type_dipeptide/oligopeptide/nickel_transport_system,_permease_component	EP	-
SRVP_Atabeya-1-FCNFGDKI_22400	SRVP_Atabeya-1_2241 # 2278265 # 2279335 # 1 # ID=1_2241;partial=00;start_type=GTG;rbs_motif=AGGAGG;rbs_spacer=5-10bp;gc_cont=0.503	SRVP_Atabeya-1_2241	SR-VP_11_27_2022_S1_100cm_MT	1	2278265	2279335	1071	11625022	0.0803187	arCOG00184	AppF	ABC-type_oligopeptide_transport_system,_ATPase_component	E	COG4608	ABC-type_oligopeptide_transport_system,_ATPase_component	E	-
SRVP_Atabeya-1-FCNFGDKI_22490	SRVP_Atabeya-1_2250 # 2287984 # 2290668 # 1 # ID=1_2250;partial=00;start_type=ATG;rbs_motif=GGAG/GAGG;rbs_spacer=5-10bp;gc_cont=0.514	SRVP_Atabeya-1_2250	SR-VP_07_25_2022_A4_70cm_MT	1	2287984	2290668	2685	19546	19.0545	-	-	-	-	COG3459	Cellobiose_phosphorylase	G	-
SRVP_Atabeya-1-FCNFGDKI_22740	SRVP_Atabeya-1_2275 # 2309198 # 2309542 # -1 # ID=1_2275;partial=00;start_type=TTG;rbs_motif=AGGAGG;rbs_spacer=5-10bp;gc_cont=0.499	SRVP_Atabeya-1_2275	SR-VP_11_27_2022_S1_100cm_MT	2	2309198	2309542	345	11625022	0.498674	-	-	-	-	-	-	-	-
SRVP_Atabeya-1-FCNFGDKI_22750	SRVP_Atabeya-1_2276 # 2309582 # 2310742 # -1 # ID=1_2276;partial=00;start_type=ATG;rbs_motif=3Base/5BMM;rbs_spacer=13-15bp;gc_cont=0.494	SRVP_Atabeya-1_2276	SR-VP_11_27_2022_S1_100cm_MT	3	2309582	2310742	1161	11625022	0.222277	arCOG00940	-	Radical_SAM_superfamily_enzyme	R	COG4001	Uncharacterized_conserved_protein	S	-
SRVP_Atabeya-1-FCNFGDKI_23050	SRVP_Atabeya-1_2306 # 2330887 # 2334375 # -1 # ID=1_2306;partial=00;start_type=ATG;rbs_motif=AGGAG/GGAGG;rbs_spacer=11-12bp;gc_cont=0.487	SRVP_Atabeya-1_2306	SR-VP_11_27_2022_S1_100cm_MT	2	2330887	2334375	3489	11625022	0.04931	-	-	-	-	COG1378	Sugar-specific_transcriptional_regulator_TrmB	K	-
SRVP_Atabeya-1-FCNFGDKI_23060	SRVP_Atabeya-1_2307 # 2334441 # 2335232 # -1 # ID=1_2307;partial=00;start_type=TTG;rbs_motif=GGAG/GAGG;rbs_spacer=5-10bp;gc_cont=0.535	SRVP_Atabeya-1_2307	SR-VP_11_27_2022_S1_100cm_MT	1	2334441	2335232	792	11625022	0.108613	-	-	-	-	-	-	-	-
SRVP_Atabeya-1-FCNFGDKI_23070	SRVP_Atabeya-1_2308 # 2335534 # 2335953 # 1 # ID=1_2308;partial=00;start_type=ATG;rbs_motif=4Base/6BMM;rbs_spacer=13-15bp;gc_cont=0.452	SRVP_Atabeya-1_2308	SR-VP_11_27_2022_S1_100cm_MT	2	2335534	2335953	420	11625022	0.409625	-	-	-	-	-	-	-	-
SRVP_Atabeya-1-FCNFGDKI_23130	SRVP_Atabeya-1_2314 # 2338829 # 2340133 # -1 # ID=1_2314;partial=00;start_type=GTG;rbs_motif=AGGAG/GGAGG;rbs_spacer=11-12bp;gc_cont=0.505	SRVP_Atabeya-1_2314	SR-VP_11_27_2022_S1_100cm_MT	4	2338829	2340133	1305	11625022	0.263667	arCOG05195	-	TPR_repeats_containing_protein	R	COG4785	Lipoprotein_NlpI,_contains_TPR_repeats	M	-
SRVP_Atabeya-1-FCNFGDKI_23150	SRVP_Atabeya-1_2316 # 2341214 # 2342119 # -1 # ID=1_2316;partial=00;start_type=ATG;rbs_motif=AGGAGG;rbs_spacer=5-10bp;gc_cont=0.456	SRVP_Atabeya-1_2316	SR-VP_11_27_2022_S1_100cm_MT	1	2341214	2342119	906	11625022	0.0949463	arCOG00498	-	Metal-dependent_hydrolase_of_the_beta-lactamase_superfamily_II	R	COG0491	Glyoxylase_or_a_related_metal-dependent_hydrolase,_beta-lactamase_superfamily_II	R	-
SRVP_Atabeya-1-FCNFGDKI_23210	SRVP_Atabeya-1_2322 # 2348586 # 2351456 # 1 # ID=1_2322;partial=00;start_type=ATG;rbs_motif=AGGAGG;rbs_spacer=5-10bp;gc_cont=0.511	SRVP_Atabeya-1_2322	SR-VP_11_27_2022_S1_60cm_MT	1	2348586	2351456	2871	1990488	0.174988	arCOG06130	PflD	Pyruvate-formate_lyase	C	COG1882	Pyruvate-formate_lyase	C	Pyruvate_oxidation
SRVP_Atabeya-1-FCNFGDKI_23240	SRVP_Atabeya-1_2325 # 2355502 # 2357682 # 1 # ID=1_2325;partial=00;start_type=ATG;rbs_motif=3Base/5BMM;rbs_spacer=13-15bp;gc_cont=0.531	SRVP_Atabeya-1_2325	SR-VP_11_27_2022_S1_60cm_MT	1	2355502	2357682	2181	1990488	0.230348	arCOG04741	-	Zn_finger_protein	S	COG2888	Predicted_RNA-binding_protein_involved_in_translation,_contains__Zn-ribbon_domain,_DUF1610_family	R	-
SRVP_Atabeya-1-FCNFGDKI_23360	SRVP_Atabeya-1_2337 # 2367241 # 2367474 # -1 # ID=1_2337;partial=00;start_type=ATG;rbs_motif=None;rbs_spacer=None;gc_cont=0.500	SRVP_Atabeya-1_2337	SR-VP_11_27_2022_S1_100cm_MT	5	2367241	2367474	234	11625022	1.83806	-	-	-	-	-	-	-	-
SRVP_Atabeya-1-FCNFGDKI_23560	SRVP_Atabeya-1_2357 # 2384319 # 2386004 # 1 # ID=1_2357;partial=00;start_type=TTG;rbs_motif=AGGAGG;rbs_spacer=5-10bp;gc_cont=0.484	SRVP_Atabeya-1_2357	SR-VP_11_27_2022_S1_100cm_MT	2	2384319	2386004	1686	11625022	0.102042	arCOG00856	CaiC	Acyl-CoA_synthetase_(AMP-forming)/AMP-acid_ligase_II	I	COG0365	Acyl-coenzyme_A_synthetase/AMP-(fatty)_acid_ligase	I	-
SRVP_Atabeya-1-FCNFGDKI_23710	SRVP_Atabeya-1_2372 # 2397538 # 2398950 # -1 # ID=1_2372;partial=00;start_type=TTG;rbs_motif=AGGAGG;rbs_spacer=11-12bp;gc_cont=0.512	SRVP_Atabeya-1_2372	SR-VP_11_27_2022_S1_100cm_MT	8	2397538	2398950	1413	11625022	0.487028	arCOG00130	-	MFS_family_permease	G	COG2271	Sugar_phosphate_permease	G	-
SRVP_Atabeya-1-FCNFGDKI_23770	SRVP_Atabeya-1_2378 # 2405581 # 2406912 # 1 # ID=1_2378;partial=00;start_type=ATG;rbs_motif=AGGA/GGAG/GAGG;rbs_spacer=11-12bp;gc_cont=0.493	SRVP_Atabeya-1_2378	SR-VP_11_27_2022_S1_100cm_MT	6	2405581	2406912	1332	11625022	0.387484	arCOG03038	-	TPR_repeats_containing_protein	R	COG4785	Lipoprotein_NlpI,_contains_TPR_repeats	M	-
SRVP_Atabeya-1-FCNFGDKI_23810	SRVP_Atabeya-1_2382 # 2409163 # 2409615 # 1 # ID=1_2382;partial=00;start_type=GTG;rbs_motif=AGGAGG;rbs_spacer=5-10bp;gc_cont=0.479	SRVP_Atabeya-1_2382	SR-VP_11_27_2022_S1_100cm_MT	3	2409163	2409615	453	11625022	0.569678	arCOG03688	osmC	Organic_hydroperoxide_reductase	Q	COG1765	Uncharacterized_OsmC-related_protein	R	-
SRVP_Atabeya-1-FCNFGDKI_23860	SRVP_Atabeya-1_2387 # 2412179 # 2412865 # -1 # ID=1_2387;partial=00;start_type=GTG;rbs_motif=AGxAGG/AGGxGG;rbs_spacer=5-10bp;gc_cont=0.533	SRVP_Atabeya-1_2387	SR-VP_11_27_2022_S1_100cm_MT	1	2412179	2412865	687	11625022	0.125213	arCOG05003	-	Uncharacterized_metal-binding_protein,__DUF1847_family	S	COG4887	Uncharacterized_metal-binding_protein_MJ0455,_DUF1847_family	S	-
SRVP_Atabeya-1-FCNFGDKI_23930	SRVP_Atabeya-1_2394 # 2416381 # 2416830 # 1 # ID=1_2394;partial=00;start_type=TTG;rbs_motif=GGAG/GAGG;rbs_spacer=5-10bp;gc_cont=0.513	SRVP_Atabeya-1_2394	SR-VP_11_27_2022_S1_100cm_MT	1	2416381	2416830	450	11625022	0.191159	arCOG01330	-	Uncharacterized_membrane_protein	S	COG2426	Uncharacterized_membrane_protein	S	-
SRVP_Atabeya-1-FCNFGDKI_23940	SRVP_Atabeya-1_2395 # 2416908 # 2417717 # -1 # ID=1_2395;partial=00;start_type=ATG;rbs_motif=AGxAGG/AGGxGG;rbs_spacer=11-12bp;gc_cont=0.491	SRVP_Atabeya-1_2395	SR-VP_11_27_2022_S1_100cm_MT	4	2416908	2417717	810	11625022	0.424797	arCOG02043	AglS	Dolichol_phosphate-mannose_mannosyltransferase	M	-	-	-	-
SRVP_Atabeya-1-FCNFGDKI_23980	SRVP_Atabeya-1_2399 # 2420264 # 2421703 # -1 # ID=1_2399;partial=00;start_type=ATG;rbs_motif=AGGAG;rbs_spacer=5-10bp;gc_cont=0.502	SRVP_Atabeya-1_2399	SR-VP_11_27_2022_S1_100cm_MT	4	2420264	2421703	1440	11625022	0.238948	arCOG02143	HpaB	4-hydroxyphenylacetate_3-monooxygenase	C	COG2368	Aromatic_ring_hydroxylase	Q	-
SRVP_Atabeya-1-FCNFGDKI_24030	SRVP_Atabeya-1_2404 # 2425317 # 2426249 # -1 # ID=1_2404;partial=00;start_type=ATG;rbs_motif=GGAG/GAGG;rbs_spacer=5-10bp;gc_cont=0.518	SRVP_Atabeya-1_2404	SR-VP_11_27_2022_S1_100cm_MT	3	2425317	2426249	933	11625022	0.276596	arCOG02833	DegQ	Serine_protease_Do_(heat-shock_protein)	O	COG0265	Periplasmic_serine_protease,_S1-C_subfamily,_contain_C-terminal_PDZ_domain	O	-
SRVP_Atabeya-1-FCNFGDKI_24050	SRVP_Atabeya-1_2406 # 2427242 # 2428306 # 1 # ID=1_2406;partial=00;start_type=ATG;rbs_motif=None;rbs_spacer=None;gc_cont=0.503	SRVP_Atabeya-1_2406	SR-VP_11_27_2022_S1_100cm_MT	1	2427242	2428306	1065	11625022	0.0807712	arCOG00014	RbsK	Sugar_kinase,_ribokinase_family	G	COG0524	Sugar_or_nucleoside_kinase,_ribokinase_family	G	Glycolysis
SRVP_Atabeya-1-FCNFGDKI_24150	SRVP_Atabeya-1_2416 # 2438385 # 2439851 # -1 # ID=1_2416;partial=00;start_type=TTG;rbs_motif=GGAG/GAGG;rbs_spacer=5-10bp;gc_cont=0.519	SRVP_Atabeya-1_2416	SR-VP_11_27_2022_S1_100cm_MT	3	2438385	2439851	1467	11625022	0.175913	arCOG03405	MttB1	Trimethylamine:corrinoid_methyltransferase	H	COG5598	Trimethylamine:corrinoid_methyltransferase	H	-
SRVP_Atabeya-1-FCNFGDKI_24200	SRVP_Atabeya-1_2421 # 2444249 # 2444611 # -1 # ID=1_2421;partial=00;start_type=ATG;rbs_motif=GGAG/GAGG;rbs_spacer=5-10bp;gc_cont=0.474	SRVP_Atabeya-1_2421	SR-VP_11_27_2022_S1_60cm_MT	1	2444249	2444611	363	1990488	1.38399	arCOG03004	-	Cupin_domain_containing_protein	S	COG0662	Mannose-6-phosphate_isomerase,_cupin_superfamily	G	-
SRVP_Atabeya-1-FCNFGDKI_24230	SRVP_Atabeya-1_2424 # 2447051 # 2447833 # 1 # ID=1_2424;partial=00;start_type=TTG;rbs_motif=GGAGG;rbs_spacer=5-10bp;gc_cont=0.506	SRVP_Atabeya-1_2424	SR-VP_11_27_2022_S1_100cm_MT	9	2447051	2447833	783	11625022	0.988751	arCOG00415	RadA	RecA/RadA_recombinase,_contains_N-terminal_HHH_domain	L	COG0468	RecA/RadA_recombinase	L	-
SRVP_Atabeya-1-FCNFGDKI_24340	SRVP_Atabeya-1_2435 # 2457377 # 2458534 # 1 # ID=1_2435;partial=00;start_type=ATG;rbs_motif=GGA/GAG/AGG;rbs_spacer=5-10bp;gc_cont=0.489	SRVP_Atabeya-1_2435	SR-VP_11_27_2022_S1_80cm_MT	1	2457377	2458534	1158	4000856	0.215843	arCOG00108	Mod	Adenine_specific_DNA_methylase_Mod	L	COG2189	Adenine_specific_DNA_methylase_Mod	L	-
SRVP_Atabeya-1-FCNFGDKI_24360	SRVP_Atabeya-1_2437 # 2459997 # 2460287 # -1 # ID=1_2437;partial=00;start_type=ATG;rbs_motif=3Base/5BMM;rbs_spacer=13-15bp;gc_cont=0.474	SRVP_Atabeya-1_2437	SR-VP_11_27_2022_S1_100cm_MT	4	2459997	2460287	291	11625022	1.18242	arCOG01753	Ssh10b	Archaeal_DNA-binding_protein_Alba	K	COG1581	DNA/RNA-binding_protein_AlbA/Ssh10b	K	-
SRVP_Atabeya-1-FCNFGDKI_24380	SRVP_Atabeya-1_2439 # 2461570 # 2463234 # -1 # ID=1_2439;partial=00;start_type=TTG;rbs_motif=AGGA/GGAG/GAGG;rbs_spacer=11-12bp;gc_cont=0.492	SRVP_Atabeya-1_2439	SR-VP_11_27_2022_S1_100cm_MT	2	2461570	2463234	1665	11625022	0.103329	arCOG00164	CysU	ABC-type_sulfate_transport_system,_permease_component	O	COG1178	ABC-type_Fe3+_transport_system,_permease_component	P	-
SRVP_Atabeya-1-FCNFGDKI_24400	SRVP_Atabeya-1_2441 # 2464183 # 2464917 # -1 # ID=1_2441;partial=00;start_type=GTG;rbs_motif=GGxGG;rbs_spacer=11-12bp;gc_cont=0.493	SRVP_Atabeya-1_2441	SR-VP_11_27_2022_S1_100cm_MT	1	2464183	2464917	735	11625022	0.117036	arCOG02291	-	HAD_superfamily_hydrolase	R	COG1011	FMN_and_5-amino-6-(5-phospho-D-ribitylamino)uracil_phosphatase_YigB,_HAD_superfamily_(riboflavin_biosynthesis)	H	-
SRVP_Atabeya-1-FCNFGDKI_24470	SRVP_Atabeya-1_2448 # 2472393 # 2473118 # 1 # ID=1_2448;partial=00;start_type=TTG;rbs_motif=AGGAGG;rbs_spacer=5-10bp;gc_cont=0.474	SRVP_Atabeya-1_2448	SR-VP_11_27_2022_S1_100cm_MT	1	2472393	2473118	726	11625022	0.118487	-	-	-	-	-	-	-	-
SRVP_Atabeya-1-FCNFGDKI_24520	SRVP_Atabeya-1_2453 # 2477390 # 2478013 # 1 # ID=1_2453;partial=00;start_type=ATG;rbs_motif=GGAG/GAGG;rbs_spacer=5-10bp;gc_cont=0.500	SRVP_Atabeya-1_2453	SR-VP_11_27_2022_S1_100cm_MT	2	2477390	2478013	624	11625022	0.275709	-	-	-	-	-	-	-	-
SRVP_Atabeya-1-FCNFGDKI_24570	SRVP_Atabeya-1_2458 # 2479833 # 2481821 # 1 # ID=1_2458;partial=00;start_type=TTG;rbs_motif=GGxGG;rbs_spacer=11-12bp;gc_cont=0.505	SRVP_Atabeya-1_2458	SR-VP_11_27_2022_S1_100cm_MT	3	2479833	2481821	1989	11625022	0.129746	arCOG01534	DdpA	ABC-type_transport_system,_periplasmic_component	E	COG0747	ABC-type_transport_system,_periplasmic_component	E	-
SRVP_Atabeya-1-FCNFGDKI_24590	SRVP_Atabeya-1_2460 # 2482962 # 2483279 # 1 # ID=1_2460;partial=00;start_type=ATG;rbs_motif=GGA/GAG/AGG;rbs_spacer=5-10bp;gc_cont=0.443	SRVP_Atabeya-1_2460	SR-VP_11_27_2022_S1_100cm_MT	473	2482962	2483279	318	11625022	127.95	-	-	-	-	-	-	-	-
SRVP_Atabeya-1-FCNFGDKI_24600	SRVP_Atabeya-1_2461 # 2483297 # 2483611 # 1 # ID=1_2461;partial=00;start_type=ATG;rbs_motif=GGxGG;rbs_spacer=11-12bp;gc_cont=0.463	SRVP_Atabeya-1_2461	SR-VP_11_27_2022_S1_100cm_MT	489	2483297	2483611	315	11625022	133.538	-	-	-	-	-	-	-	-
SRVP_Atabeya-1-FCNFGDKI_24610	SRVP_Atabeya-1_2462 # 2483698 # 2483997 # 1 # ID=1_2462;partial=00;start_type=ATG;rbs_motif=GGA/GAG/AGG;rbs_spacer=5-10bp;gc_cont=0.487	SRVP_Atabeya-1_2462	SR-VP_11_27_2022_S1_100cm_MT	515	2483698	2483997	300	11625022	147.67	-	-	-	-	-	-	-	-
SRVP_Atabeya-1-FCNFGDKI_24620	SRVP_Atabeya-1_2463 # 2484023 # 2484334 # 1 # ID=1_2463;partial=00;start_type=ATG;rbs_motif=AGGAG(G)/GGAGG;rbs_spacer=13-15bp;gc_cont=0.494	SRVP_Atabeya-1_2463	SR-VP_11_27_2022_S1_100cm_MT	347	2484023	2484334	312	11625022	95.6712	-	-	-	-	-	-	-	-
SRVP_Atabeya-1-FCNFGDKI_24670	SRVP_Atabeya-1_2468 # 2488331 # 2489455 # -1 # ID=1_2468;partial=00;start_type=ATG;rbs_motif=AGGA/GGAG/GAGG;rbs_spacer=11-12bp;gc_cont=0.507	SRVP_Atabeya-1_2468	SR-VP_11_27_2022_S1_100cm_MT	1	2488331	2489455	1125	11625022	0.0764634	arCOG01887	TrpS	Tryptophanyl-tRNA_synthetase	J	COG0180	Tryptophanyl-tRNA_synthetase	J	Aminoacyl-tRNA_synthetases
SRVP_Atabeya-1-FCNFGDKI_24930	SRVP_Atabeya-1_2494 # 2515458 # 2515838 # 1 # ID=1_2494;partial=00;start_type=TTG;rbs_motif=GGAGG;rbs_spacer=5-10bp;gc_cont=0.491	SRVP_Atabeya-1_2494	SR-VP_11_27_2022_S1_100cm_MT	2	2515458	2515838	381	11625022	0.451556	-	-	-	-	-	-	-	-
SRVP_Atabeya-1-FCNFGDKI_24940	SRVP_Atabeya-1_2495 # 2515914 # 2516693 # -1 # ID=1_2495;partial=00;start_type=TTG;rbs_motif=GGAGG;rbs_spacer=5-10bp;gc_cont=0.485	SRVP_Atabeya-1_2495	SR-VP_11_27_2022_S1_100cm_MT	2	2515914	2516693	780	11625022	0.220568	arCOG07535	-	Uncharacterized_protein	S	-	-	-	-
SRVP_Atabeya-1-FCNFGDKI_24970	SRVP_Atabeya-1_2498 # 2518635 # 2519387 # -1 # ID=1_2498;partial=00;start_type=ATG;rbs_motif=GGA/GAG/AGG;rbs_spacer=11-12bp;gc_cont=0.478	SRVP_Atabeya-1_2498	SR-VP_11_27_2022_S1_100cm_MT	4	2518635	2519387	753	11625022	0.456953	arCOG01171	KaiC	KaiC_family_ATPase_implicated_in_signal_transduction	T	COG0467	RecA-superfamily_ATPase,_KaiC/GvpD/RAD55_family	T	-
SRVP_Atabeya-1-FCNFGDKI_25100	SRVP_Atabeya-1_2511 # 2529803 # 2530486 # -1 # ID=1_2511;partial=00;start_type=TTG;rbs_motif=GGAGG;rbs_spacer=5-10bp;gc_cont=0.468	SRVP_Atabeya-1_2511	SR-VP_11_27_2022_S1_100cm_MT	1	2529803	2530486	684	11625022	0.125762	arCOG00894	-	Glycosyl_transferase_family_2	M	COG1215	Glycosyltransferase,_catalytic_subunit_of_cellulose_synthase_and_poly-beta-1,6-N-acetylglucosamine_synthase	N	-
SRVP_Atabeya-1-FCNFGDKI_25200	SRVP_Atabeya-1_2521 # 2545019 # 2546614 # -1 # ID=1_2521;partial=00;start_type=TTG;rbs_motif=GGA/GAG/AGG;rbs_spacer=11-12bp;gc_cont=0.491	SRVP_Atabeya-1_2521	SR-VP_11_27_2022_S1_100cm_MT	1	2545019	2546614	1596	11625022	0.0538981	arCOG00118	WecE	Predicted_pyridoxal_phosphate-dependent_enzyme_apparently_involved_in_regulation_of_cell_wall_biogenesis	M	COG0399	dTDP-4-amino-4,6-dideoxygalactose_transaminase	M	-
SRVP_Atabeya-1-FCNFGDKI_25330	SRVP_Atabeya-1_2534 # 2559077 # 2559970 # -1 # ID=1_2534;partial=00;start_type=ATG;rbs_motif=GGA/GAG/AGG;rbs_spacer=5-10bp;gc_cont=0.512	SRVP_Atabeya-1_2534	SR-VP_11_27_2022_S1_100cm_MT	1	2559077	2559970	894	11625022	0.0962207	-	-	-	-	-	-	-	-
SRVP_Atabeya-1-FCNFGDKI_25340	SRVP_Atabeya-1_2535 # 2559978 # 2560793 # -1 # ID=1_2535;partial=00;start_type=TTG;rbs_motif=GGA/GAG/AGG;rbs_spacer=11-12bp;gc_cont=0.529	SRVP_Atabeya-1_2535	SR-VP_11_27_2022_S1_100cm_MT	4	2559978	2560793	816	11625022	0.421673	-	-	-	-	-	-	-	-
SRVP_Atabeya-1-FCNFGDKI_25380	SRVP_Atabeya-1_2539 # 2563162 # 2564331 # 1 # ID=1_2539;partial=00;start_type=ATG;rbs_motif=GGA/GAG/AGG;rbs_spacer=5-10bp;gc_cont=0.479	SRVP_Atabeya-1_2539	SR-VP_07_25_2022_A1_70cm_MT	1	2563162	2564331	1170	125142	6.82985	arCOG00196	CcmA	ABC-type_multidrug_transport_system,_ATPase_component	V	COG4586	ABC-type_uncharacterized_transport_system,_ATPase_component	R	-
SRVP_Atabeya-1-FCNFGDKI_25400	SRVP_Atabeya-1_2541 # 2565415 # 2566116 # 1 # ID=1_2541;partial=00;start_type=ATG;rbs_motif=AGGAG;rbs_spacer=3-4bp;gc_cont=0.499	SRVP_Atabeya-1_2541	SR-VP_11_27_2022_S1_60cm_MT	1	2565415	2566116	702	1990488	0.715654	arCOG01467	-	ABC-type_multidrug_transport_system,_permease_component	V	COG0842	ABC-type_multidrug_transport_system,_permease_component	V	-
SRVP_Atabeya-1-FCNFGDKI_25430	SRVP_Atabeya-1_2544 # 2568867 # 2569094 # 1 # ID=1_2544;partial=00;start_type=TTG;rbs_motif=AGGAGG;rbs_spacer=11-12bp;gc_cont=0.487	SRVP_Atabeya-1_2544	SR-VP_11_27_2022_S1_100cm_MT	1	2568867	2569094	228	11625022	0.377287	-	-	-	-	-	-	-	-
SRVP_Atabeya-1-FCNFGDKI_25440	SRVP_Atabeya-1_2545 # 2569099 # 2569935 # 1 # ID=1_2545;partial=00;start_type=GTG;rbs_motif=GGxGG;rbs_spacer=5-10bp;gc_cont=0.491	SRVP_Atabeya-1_2545	SR-VP_11_27_2022_S1_100cm_MT	4	2569099	2569935	837	11625022	0.411094	-	-	-	-	-	-	-	-
SRVP_Atabeya-1-FCNFGDKI_25480	SRVP_Atabeya-1_2549 # 2573099 # 2573833 # -1 # ID=1_2549;partial=00;start_type=TTG;rbs_motif=GGAG/GAGG;rbs_spacer=5-10bp;gc_cont=0.478	SRVP_Atabeya-1_2549	SR-VP_11_27_2022_S1_100cm_MT	3	2573099	2573833	735	11625022	0.351108	-	-	-	-	-	-	-	-
SRVP_Atabeya-1-FCNFGDKI_25490	SRVP_Atabeya-1_2550 # 2574016 # 2575881 # -1 # ID=1_2550;partial=00;start_type=ATG;rbs_motif=AGGAG;rbs_spacer=5-10bp;gc_cont=0.534	SRVP_Atabeya-1_2550	SR-VP_11_27_2022_S1_100cm_MT	1	2574016	2575881	1866	11625022	0.0460993	arCOG00706	gor	Aldehyde:ferredoxin_oxidoreductase	C	COG2414	Aldehyde:ferredoxin_oxidoreductase	C	-
SRVP_Atabeya-1-FCNFGDKI_25580	SRVP_Atabeya-1_2559 # 2587471 # 2589060 # -1 # ID=1_2559;partial=00;start_type=ATG;rbs_motif=None;rbs_spacer=None;gc_cont=0.494	SRVP_Atabeya-1_2559	SR-VP_07_25_2022_A4_70cm_MT	1	2587471	2589060	1590	19546	32.177	-	-	-	-	-	-	-	-
SRVP_Atabeya-1-FCNFGDKI_25610	SRVP_Atabeya-1_2562 # 2591671 # 2592891 # -1 # ID=1_2562;partial=00;start_type=TTG;rbs_motif=GGA/GAG/AGG;rbs_spacer=5-10bp;gc_cont=0.462	SRVP_Atabeya-1_2562	SR-VP_07_25_2022_A4_70cm_MT	1	2591671	2592891	1221	19546	41.9012	-	-	-	-	-	-	-	-
SRVP_Atabeya-1-FCNFGDKI_25630	SRVP_Atabeya-1_2564 # 2593442 # 2593879 # -1 # ID=1_2564;partial=00;start_type=ATG;rbs_motif=AGGAGG;rbs_spacer=11-12bp;gc_cont=0.477	SRVP_Atabeya-1_2564	SR-VP_11_27_2022_S1_100cm_MT	1	2593442	2593879	438	11625022	0.196396	-	-	-	-	-	-	-	-
SRVP_Atabeya-1-FCNFGDKI_25910	SRVP_Atabeya-1_2592 # 2620281 # 2621927 # 1 # ID=1_2592;partial=00;start_type=TTG;rbs_motif=GGAG/GAGG;rbs_spacer=5-10bp;gc_cont=0.495	SRVP_Atabeya-1_2592	SR-VP_11_27_2022_S1_100cm_MT	14	2620281	2621927	1647	11625022	0.731208	arCOG06073	PckA	Phosphoenolpyruvate_carboxykinase_(ATP)	C	COG1866	Phosphoenolpyruvate_carboxykinase,_ATP-dependent	C	Gluconeogenesis
SRVP_Atabeya-1-FCNFGDKI_25920	SRVP_Atabeya-1_2593 # 2621972 # 2623018 # 1 # ID=1_2593;partial=00;start_type=GTG;rbs_motif=GGA/GAG/AGG;rbs_spacer=5-10bp;gc_cont=0.521	SRVP_Atabeya-1_2593	SR-VP_11_27_2022_S1_60cm_MT	1	2621972	2623018	1047	1990488	0.479837	arCOG01459	Tdh	Threonine_dehydrogenase_or_related_Zn-dependent_dehydrogenase	E	COG1063	Threonine_dehydrogenase_or_related_Zn-dependent_dehydrogenase	ER	Non-phosphorylated_Entner-Doudoroff_pathway
SRVP_Atabeya-1-FCNFGDKI_26080	SRVP_Atabeya-1_2609 # 2636891 # 2637619 # 1 # ID=1_2609;partial=00;start_type=ATG;rbs_motif=AGGAG/GGAGG;rbs_spacer=11-12bp;gc_cont=0.519	SRVP_Atabeya-1_2609	SR-VP_11_27_2022_S1_100cm_MT	1	2636891	2637619	729	11625022	0.117999	-	-	-	-	-	-	-	-
SRVP_Atabeya-1-FCNFGDKI_26100	SRVP_Atabeya-1_2611 # 2638216 # 2639118 # -1 # ID=1_2611;partial=00;start_type=TTG;rbs_motif=GGxGG;rbs_spacer=11-12bp;gc_cont=0.512	SRVP_Atabeya-1_2611	SR-VP_11_27_2022_S1_100cm_MT	1	2638216	2639118	903	11625022	0.0952617	arCOG04558	URH1	Inosine-uridine_nucleoside_N-ribohydrolase	F	COG1957	Inosine-uridine_nucleoside_N-ribohydrolase	F	Pyrimidine_salvage
SRVP_Atabeya-1-FCNFGDKI_26150	SRVP_Atabeya-1_2616 # 2643712 # 2644605 # -1 # ID=1_2616;partial=00;start_type=TTG;rbs_motif=GGA/GAG/AGG;rbs_spacer=5-10bp;gc_cont=0.494	SRVP_Atabeya-1_2616	SR-VP_11_27_2022_S2_40cm_MT	1	2643712	2644605	894	4025082	0.277899	arCOG01895	IolE	Sugar_phosphate_isomerase/epimerase	G	COG0648	Endonuclease_IV	L	-
SRVP_Atabeya-1-FCNFGDKI_26200	SRVP_Atabeya-1_2621 # 2649726 # 2650565 # 1 # ID=1_2621;partial=00;start_type=TTG;rbs_motif=GGAGG;rbs_spacer=5-10bp;gc_cont=0.507	SRVP_Atabeya-1_2621	SR-VP_11_27_2022_S1_100cm_MT	6	2649726	2650565	840	11625022	0.614438	arCOG02189	NapF	HTH_containing_ranscriptional_regulator_fused_to_ferredoxin_domain	C	COG1149	MinD_superfamily_P-loop_ATPase,_contains_an_inserted_ferredoxin_domain	R	-
SRVP_Atabeya-1-FCNFGDKI_26210	SRVP_Atabeya-1_2622 # 2650570 # 2650803 # 1 # ID=1_2622;partial=00;start_type=ATG;rbs_motif=4Base/6BMM;rbs_spacer=13-15bp;gc_cont=0.483	SRVP_Atabeya-1_2622	SR-VP_11_27_2022_S1_100cm_MT	5	2650570	2650803	234	11625022	1.83806	arCOG06908	NapF	Ferredoxin	C	COG1149	MinD_superfamily_P-loop_ATPase,_contains_an_inserted_ferredoxin_domain	R	-
SRVP_Atabeya-1-FCNFGDKI_26230	SRVP_Atabeya-1_2624 # 2652073 # 2653527 # -1 # ID=1_2624;partial=00;start_type=ATG;rbs_motif=AGGAG;rbs_spacer=5-10bp;gc_cont=0.507	SRVP_Atabeya-1_2624	SR-VP_11_27_2022_S1_100cm_MT	1	2652073	2653527	1455	11625022	0.0591212	arCOG00337	GlcD	FAD/FMN-containing_dehydrogenase	C	COG0277	FAD/FMN-containing_lactate_dehydrogenase/glycolate_oxidase	C	-
SRVP_Atabeya-1-FCNFGDKI_26290	SRVP_Atabeya-1_2630 # 2658977 # 2659339 # -1 # ID=1_2630;partial=00;start_type=ATG;rbs_motif=AGxAGG/AGGxGG;rbs_spacer=5-10bp;gc_cont=0.507	SRVP_Atabeya-1_2630	SR-VP_11_27_2022_S1_100cm_MT	7	2658977	2659339	363	11625022	1.65881	arCOG04189	-	Membrane_associated_transcription_regulator,_contains_HTH_domain	S	-	-	-	-
SRVP_Atabeya-1-FCNFGDKI_26340	SRVP_Atabeya-1_2635 # 2661180 # 2661389 # -1 # ID=1_2635;partial=00;start_type=TTG;rbs_motif=GGAG/GAGG;rbs_spacer=5-10bp;gc_cont=0.433	SRVP_Atabeya-1_2635	SR-VP_11_27_2022_S1_100cm_MT	3	2661180	2661389	210	11625022	1.22888	arCOG03034	-	TPR_repeats_containing_protein	R	-	-	-	-
SRVP_Atabeya-1-FCNFGDKI_26350	SRVP_Atabeya-1_2636 # 2661540 # 2661938 # -1 # ID=1_2636;partial=00;start_type=ATG;rbs_motif=4Base/6BMM;rbs_spacer=13-15bp;gc_cont=0.596	SRVP_Atabeya-1_2636	SR-VP_11_27_2022_S1_60cm_MT	22	2661540	2661938	399	1990488	27.7007	-	-	-	-	COG5649	Uncharacterized_conserved_protein,_DUF1801_domain	S	-
SRVP_Atabeya-1-FCNFGDKI_26350	SRVP_Atabeya-1_2636 # 2661540 # 2661938 # -1 # ID=1_2636;partial=00;start_type=ATG;rbs_motif=4Base/6BMM;rbs_spacer=13-15bp;gc_cont=0.596	SRVP_Atabeya-1_2636	SR-VP_11_27_2022_S1_100cm_MT	3	2661540	2661938	399	11625022	0.646777	-	-	-	-	COG5649	Uncharacterized_conserved_protein,_DUF1801_domain	S	-
SRVP_Atabeya-1-FCNFGDKI_26350	SRVP_Atabeya-1_2636 # 2661540 # 2661938 # -1 # ID=1_2636;partial=00;start_type=ATG;rbs_motif=4Base/6BMM;rbs_spacer=13-15bp;gc_cont=0.596	SRVP_Atabeya-1_2636	SR-VP_11_27_2022_S1_40cm_MT	2	2661540	2661938	399	1473124	3.40265	-	-	-	-	COG5649	Uncharacterized_conserved_protein,_DUF1801_domain	S	-
SRVP_Atabeya-1-FCNFGDKI_26350	SRVP_Atabeya-1_2636 # 2661540 # 2661938 # -1 # ID=1_2636;partial=00;start_type=ATG;rbs_motif=4Base/6BMM;rbs_spacer=13-15bp;gc_cont=0.596	SRVP_Atabeya-1_2636	SR-VP_11_27_2022_S1_80cm_MT	1	2661540	2661938	399	4000856	0.626432	-	-	-	-	COG5649	Uncharacterized_conserved_protein,_DUF1801_domain	S	-
SRVP_Atabeya-1-FCNFGDKI_26440	SRVP_Atabeya-1_2645 # 2669895 # 2671250 # -1 # ID=1_2645;partial=00;start_type=TTG;rbs_motif=GGAG/GAGG;rbs_spacer=5-10bp;gc_cont=0.492	SRVP_Atabeya-1_2645	SR-VP_11_27_2022_S1_100cm_MT	2	2669895	2671250	1356	11625022	0.126875	arCOG00353	HflX	50S_ribosomal_subunit-associated_GTPase_HflX	J	COG2262	50S_ribosomal_subunit-associated_GTPase_HflX	J	-
SRVP_Atabeya-1-FCNFGDKI_26500	SRVP_Atabeya-1_2651 # 2674929 # 2676299 # -1 # ID=1_2651;partial=00;start_type=ATG;rbs_motif=GGAGG;rbs_spacer=5-10bp;gc_cont=0.487	SRVP_Atabeya-1_2651	SR-VP_11_27_2022_S1_100cm_MT	2	2674929	2676299	1371	11625022	0.125487	arCOG00322	TldE	Inactivated_Zn-dependent_protease,_component_of_TldD/TldE_system	O	COG0312	Zn-dependent_protease_PmbA/TldA_or_its_inactivated_homolog	R	-
SRVP_Atabeya-1-FCNFGDKI_26530	SRVP_Atabeya-1_2654 # 2679017 # 2680423 # 1 # ID=1_2654;partial=00;start_type=ATG;rbs_motif=GGA/GAG/AGG;rbs_spacer=5-10bp;gc_cont=0.489	SRVP_Atabeya-1_2654	SR-VP_11_27_2022_S1_100cm_MT	5	2679017	2680423	1407	11625022	0.305691	arCOG00915	GabT	4-aminobutyrate_aminotransferase_or_related_aminotransferase	E	COG0160	Acetylornithine_aminotransferase/4-aminobutyrate_aminotransferase	E	Arginine_biosynthesis
SRVP_Atabeya-1-FCNFGDKI_26610	SRVP_Atabeya-1_2662 # 2690052 # 2691491 # 1 # ID=1_2662;partial=00;start_type=TTG;rbs_motif=AGGAG/GGAGG;rbs_spacer=11-12bp;gc_cont=0.507	SRVP_Atabeya-1_2662	SR-VP_11_27_2022_S1_100cm_MT	1	2690052	2691491	1440	11625022	0.059737	arCOG04758	PepF	Oligoendopeptidase_F	E	COG1164	Oligoendopeptidase_F	E	-
SRVP_Atabeya-1-FCNFGDKI_26650	SRVP_Atabeya-1_2666 # 2694164 # 2694910 # -1 # ID=1_2666;partial=00;start_type=TTG;rbs_motif=AGGAG/GGAGG;rbs_spacer=11-12bp;gc_cont=0.523	SRVP_Atabeya-1_2666	SR-VP_11_27_2022_S1_80cm_MT	1	2694164	2694910	747	4000856	0.3346	-	-	-	-	-	-	-	-
SRVP_Atabeya-1-FCNFGDKI_26840	SRVP_Atabeya-1_2685 # 2707353 # 2707769 # 1 # ID=1_2685;partial=00;start_type=TTG;rbs_motif=GGxGG;rbs_spacer=11-12bp;gc_cont=0.480	SRVP_Atabeya-1_2685	SR-VP_11_27_2022_S1_100cm_MT	6	2707353	2707769	417	11625022	1.23772	arCOG02105	-	Minimal_nucleotidyltransferase	V	COG1708	Predicted_nucleotidyltransferase,_MJ0604_family	R	-
SRVP_Atabeya-1-FCNFGDKI_26850	SRVP_Atabeya-1_2686 # 2707766 # 2708182 # 1 # ID=1_2686;partial=00;start_type=ATG;rbs_motif=AGGAG;rbs_spacer=5-10bp;gc_cont=0.477	SRVP_Atabeya-1_2686	SR-VP_11_27_2022_S1_100cm_MT	1	2707766	2708182	417	11625022	0.206286	arCOG02108	-	HEPN_domain_containing_protein	V	COG2445	Uncharacterized_HEPN_domain_protein_YutE,_UPF0331/DUF86_family	R	-
SRVP_Atabeya-1-FCNFGDKI_26910	SRVP_Atabeya-1_2692 # 2712774 # 2713664 # -1 # ID=1_2692;partial=00;start_type=TTG;rbs_motif=AGGAGG;rbs_spacer=11-12bp;gc_cont=0.494	SRVP_Atabeya-1_2692	SR-VP_11_27_2022_S1_100cm_MT	1	2712774	2713664	891	11625022	0.0965447	arCOG04443	RbcL	Ribulose_1,5-bisphosphate_carboxylase,_large_subunit	G	COG1850	Ribulose_1,5-bisphosphate_carboxylase,_large_subunit,_or_a_RuBisCO-like_protein	G	-
SRVP_Atabeya-1-FCNFGDKI_26920	SRVP_Atabeya-1_2693 # 2713822 # 2714280 # -1 # ID=1_2693;partial=00;start_type=ATG;rbs_motif=GGA/GAG/AGG;rbs_spacer=11-12bp;gc_cont=0.492	SRVP_Atabeya-1_2693	SR-VP_11_27_2022_S1_100cm_MT	2	2713822	2714280	459	11625022	0.374821	-	-	-	-	COG4635	Protoporphyrinogen_IX_oxidase,_menaquinone-dependent_(flavodoxin_domain)	H	-
SRVP_Atabeya-1-FCNFGDKI_27100	SRVP_Atabeya-1_2711 # 2729937 # 2732636 # -1 # ID=1_2711;partial=00;start_type=ATG;rbs_motif=None;rbs_spacer=None;gc_cont=0.508	SRVP_Atabeya-1_2711	SR-VP_11_27_2022_S1_100cm_MT	4	2729937	2732636	2700	11625022	0.127439	arCOG01111	PpsA	Phosphoenolpyruvate_synthase/pyruvate_phosphate_dikinase	G	COG0574	Phosphoenolpyruvate_synthase/pyruvate_phosphate_dikinase	G	Gluconeogenesis
SRVP_Atabeya-1-FCNFGDKI_27110	SRVP_Atabeya-1_2712 # 2733009 # 2733704 # 1 # ID=1_2712;partial=00;start_type=ATG;rbs_motif=GGAG/GAGG;rbs_spacer=5-10bp;gc_cont=0.501	SRVP_Atabeya-1_2712	SR-VP_11_27_2022_S1_100cm_MT	2	2733009	2733704	696	11625022	0.247188	arCOG07015	-	Uncharacterized_membrane_protein	S	-	-	-	-
SRVP_Atabeya-1-FCNFGDKI_27120	SRVP_Atabeya-1_2713 # 2733966 # 2734778 # 1 # ID=1_2713;partial=00;start_type=TTG;rbs_motif=AGGAG/GGAGG;rbs_spacer=11-12bp;gc_cont=0.515	SRVP_Atabeya-1_2713	SR-VP_11_27_2022_S1_100cm_MT	1	2733966	2734778	813	11625022	0.105807	arCOG04741	-	Zn_finger_protein	S	COG1552	Ribosomal_protein_L40E	J	Archaeal_ribosomal_proteins
SRVP_Atabeya-1-FCNFGDKI_27170	SRVP_Atabeya-1_2718 # 2738219 # 2739157 # -1 # ID=1_2718;partial=00;start_type=TTG;rbs_motif=GGA/GAG/AGG;rbs_spacer=11-12bp;gc_cont=0.507	SRVP_Atabeya-1_2718	SR-VP_07_25_2022_A4_70cm_MT	1	2738219	2739157	939	19546	54.4849	arCOG10205	-	Zinc_dependent_phospholipase_C/S1-P1_nuclease	I	-	-	-	-
SRVP_Atabeya-1-FCNFGDKI_27190	SRVP_Atabeya-1_2720 # 2739738 # 2740586 # -1 # ID=1_2720;partial=00;start_type=ATG;rbs_motif=GGAG/GAGG;rbs_spacer=5-10bp;gc_cont=0.476	SRVP_Atabeya-1_2720	SR-VP_11_27_2022_S1_100cm_MT	3	2739738	2740586	849	11625022	0.303962	arCOG01931	-	Predicted_metal-dependent_hydrolase_of_the_TIM-barrel_fold	R	COG2159	5-carboxyvanillate_decarboxylase_LigW_(lignin_degradation),_amidohydro_domain	G	-
SRVP_Atabeya-1-FCNFGDKI_27250	SRVP_Atabeya-1_2726 # 2744688 # 2747111 # 1 # ID=1_2726;partial=00;start_type=TTG;rbs_motif=GGAG/GAGG;rbs_spacer=5-10bp;gc_cont=0.490	SRVP_Atabeya-1_2726	SR-VP_11_27_2022_S1_100cm_MT	1	2744688	2747111	2424	11625022	0.0354874	arCOG01994	SpoIIM	Uncharacterized_membrane_protein,_a_component_of_a_putative_membrane_remodelling_system	R	COG1300	Stage_II_sporulation_protein_SpoIIM,_component_of_the_engulfment_complex	D	-
SRVP_Atabeya-1-FCNFGDKI_27360	SRVP_Atabeya-1_2737 # 2757486 # 2759414 # -1 # ID=1_2737;partial=00;start_type=ATG;rbs_motif=AGGAG(G)/GGAGG;rbs_spacer=13-15bp;gc_cont=0.495	SRVP_Atabeya-1_2737	SR-VP_11_27_2022_S1_100cm_MT	4	2757486	2759414	1929	11625022	0.178375	-	-	-	-	COG2866	Murein_tripeptide_amidase_MpaA	M	-
SRVP_Atabeya-1-FCNFGDKI_27370	SRVP_Atabeya-1_2738 # 2759511 # 2760587 # -1 # ID=1_2738;partial=00;start_type=TTG;rbs_motif=GGAGG;rbs_spacer=5-10bp;gc_cont=0.515	SRVP_Atabeya-1_2738	SR-VP_11_27_2022_S1_100cm_MT	3	2759511	2760587	1077	11625022	0.239614	arCOG01622	MviM	Predicted_dehydrogenase	R	COG0673	Predicted_dehydrogenase	R	-
SRVP_Atabeya-1-FCNFGDKI_27380	SRVP_Atabeya-1_2739 # 2760840 # 2762504 # -1 # ID=1_2739;partial=00;start_type=TTG;rbs_motif=AGGAG/GGAGG;rbs_spacer=11-12bp;gc_cont=0.530	SRVP_Atabeya-1_2739	SR-VP_11_27_2022_S1_100cm_MT	10	2760840	2762504	1665	11625022	0.516645	arCOG04045	IlvD	Dihydroxyacid_dehydratase/phosphogluconate_dehydratase	E	COG0129	Dihydroxyacid_dehydratase/phosphogluconate_dehydratase	EG	Isoleucine,_leucine,_valine_biosynthesis
SRVP_Atabeya-1-FCNFGDKI_27500	SRVP_Atabeya-1_2751 # 2770876 # 2771295 # 1 # ID=1_2751;partial=00;start_type=ATG;rbs_motif=GGA/GAG/AGG;rbs_spacer=5-10bp;gc_cont=0.460	SRVP_Atabeya-1_2751	SR-VP_11_27_2022_S1_100cm_MT	9	2770876	2771295	420	11625022	1.84331	arCOG10940	-	Uncharacterized_membrane_protein	S	-	-	-	-
SRVP_Atabeya-1-FCNFGDKI_27520	SRVP_Atabeya-1_2753 # 2771828 # 2773648 # -1 # ID=1_2753;partial=00;start_type=ATG;rbs_motif=AGGAGG;rbs_spacer=11-12bp;gc_cont=0.504	SRVP_Atabeya-1_2753	SR-VP_07_25_2022_A1_70cm_MT	2	2771828	2773648	1821	125142	8.77641	arCOG01998	IlvB	Acetolactate_synthase_large_subunit_or_other_thiamine_pyrophosphate-requiring_enzyme	E	COG0028	Acetolactate_synthase_large_subunit_or_other_thiamine_pyrophosphate-requiring_enzyme	EH	Isoleucine,_leucine,_valine_biosynthesis
SRVP_Atabeya-1-FCNFGDKI_27740	SRVP_Atabeya-1_2775 # 2797746 # 2798084 # -1 # ID=1_2775;partial=00;start_type=TTG;rbs_motif=AGGA/GGAG/GAGG;rbs_spacer=11-12bp;gc_cont=0.481	SRVP_Atabeya-1_2775	SR-VP_11_27_2022_S1_100cm_MT	3	2797746	2798084	339	11625022	0.761251	-	-	-	-	-	-	-	-
SRVP_Atabeya-2-AMLJHBDE_00020	SRVP_Atabeya-2_2 # 597 # 2279 # -1 # ID=1_2;partial=00;start_type=ATG;rbs_motif=GGA/GAG/AGG;rbs_spacer=5-10bp;gc_cont=0.478	SRVP_Atabeya-2_2	SR-VP_11_27_2022_S1_100cm_MT	16	597	2279	1683	11625022	0.817791	-	-	-	-	-	-	-	-
SRVP_Atabeya-2-AMLJHBDE_00050	SRVP_Atabeya-2_5 # 3319 # 3828 # 1 # ID=1_5;partial=00;start_type=GTG;rbs_motif=GGA/GAG/AGG;rbs_spacer=5-10bp;gc_cont=0.451	SRVP_Atabeya-2_5	SR-VP_11_27_2022_S1_100cm_MT	2	3319	3828	510	11625022	0.337339	-	-	-	-	-	-	-	-
SRVP_Atabeya-2-AMLJHBDE_00060	SRVP_Atabeya-2_6 # 3860 # 4645 # -1 # ID=1_6;partial=00;start_type=ATG;rbs_motif=GGA/GAG/AGG;rbs_spacer=5-10bp;gc_cont=0.463	SRVP_Atabeya-2_6	SR-VP_11_27_2022_S1_100cm_MT	2	3860	4645	786	11625022	0.218884	arCOG01899	IolE	Sugar_phosphate_isomerase/epimerase	G	COG1082	Sugar_phosphate_isomerase/epimerase	G	-
SRVP_Atabeya-2-AMLJHBDE_00070	SRVP_Atabeya-2_7 # 4796 # 5578 # -1 # ID=1_7;partial=00;start_type=TTG;rbs_motif=AGGA/GGAG/GAGG;rbs_spacer=11-12bp;gc_cont=0.487	SRVP_Atabeya-2_7	SR-VP_11_27_2022_S1_100cm_MT	2	4796	5578	783	11625022	0.219722	arCOG00348	PbaB	20S_proteasome_assembly_factor,_ATP-grasp_superfamily_enzyme	O	COG2047	Proteasome_assembly_chaperone_(PAC2)_family_protein	R	-
SRVP_Atabeya-2-AMLJHBDE_00100	SRVP_Atabeya-2_10 # 7031 # 8890 # 1 # ID=1_10;partial=00;start_type=TTG;rbs_motif=GGA/GAG/AGG;rbs_spacer=5-10bp;gc_cont=0.468	SRVP_Atabeya-2_10	SR-VP_11_27_2022_S1_100cm_MT	10	7031	8890	1860	11625022	0.46248	arCOG01356	-	Radical_SAM_superfamily_enzyme	C	COG1032	Radical_SAM_superfamily_enzyme_YgiQ,_UPF0313_family	R	-
SRVP_Atabeya-2-AMLJHBDE_00130	SRVP_Atabeya-2_13 # 10456 # 11391 # -1 # ID=1_13;partial=00;start_type=ATG;rbs_motif=GGA/GAG/AGG;rbs_spacer=5-10bp;gc_cont=0.479	SRVP_Atabeya-2_13	SR-VP_11_27_2022_S1_100cm_MT	2	10456	11391	936	11625022	0.183806	arCOG01700	SpeB	Arginase_family_enzyme	E	COG0010	Arginase/agmatinase_family_enzyme	E	Urea_cycle
SRVP_Atabeya-2-AMLJHBDE_00180	SRVP_Atabeya-2_18 # 15369 # 16286 # 1 # ID=1_18;partial=00;start_type=GTG;rbs_motif=GGAG/GAGG;rbs_spacer=5-10bp;gc_cont=0.442	SRVP_Atabeya-2_18	SR-VP_11_27_2022_S1_40cm_MT	1	15369	16286	918	1473124	0.739466	-	-	-	-	-	-	-	-
SRVP_Atabeya-2-AMLJHBDE_00240	SRVP_Atabeya-2_24 # 20073 # 21269 # -1 # ID=1_24;partial=00;start_type=TTG;rbs_motif=GGA/GAG/AGG;rbs_spacer=5-10bp;gc_cont=0.459	SRVP_Atabeya-2_24	SR-VP_11_27_2022_S1_100cm_MT	5	20073	21269	1197	11625022	0.359321	arCOG04346	-	5-formaminoimidazole-4-carboxamide-1-beta-D-ribofuranosyl_5-monophosphate_synthetase_(purine_biosynthesis)	F	COG1759	5-formaminoimidazole-4-carboxamide-1-beta-D-ribofuranosyl_5'-monophosphate_synthetase_(purine_biosynthesis)	F	Purine_biosynthesis
SRVP_Atabeya-2-AMLJHBDE_00260	SRVP_Atabeya-2_26 # 22619 # 23914 # -1 # ID=1_26;partial=00;start_type=ATG;rbs_motif=None;rbs_spacer=None;gc_cont=0.481	SRVP_Atabeya-2_26	SR-VP_11_27_2022_S1_100cm_MT	3	22619	23914	1296	11625022	0.199123	arCOG02231	-	Uncharacterized_FAD-dependent_dehydrogenase	R	COG2509	FAD-dependent_dehydrogenase	R	-
SRVP_Atabeya-2-AMLJHBDE_00270	SRVP_Atabeya-2_27 # 24289 # 24732 # 1 # ID=1_27;partial=00;start_type=ATG;rbs_motif=GGAG/GAGG;rbs_spacer=5-10bp;gc_cont=0.471	SRVP_Atabeya-2_27	SR-VP_11_27_2022_S1_100cm_MT	13	24289	24732	444	11625022	2.51864	arCOG02464	PurE	Phosphoribosylcarboxyaminoimidazole_(NCAIR)_mutase	F	COG0041	Phosphoribosylcarboxyaminoimidazole_(NCAIR)_mutase	F	Purine_biosynthesis
SRVP_Atabeya-2-AMLJHBDE_00290	SRVP_Atabeya-2_29 # 25968 # 26891 # -1 # ID=1_29;partial=00;start_type=ATG;rbs_motif=GGAG/GAGG;rbs_spacer=5-10bp;gc_cont=0.476	SRVP_Atabeya-2_29	SR-VP_11_27_2022_S1_100cm_MT	3	25968	26891	924	11625022	0.27929	arCOG00014	RbsK	Sugar_kinase,_ribokinase_family	G	COG0524	Sugar_or_nucleoside_kinase,_ribokinase_family	G	Glycolysis
SRVP_Atabeya-2-AMLJHBDE_00330	SRVP_Atabeya-2_33 # 30494 # 30631 # 1 # ID=1_33;partial=00;start_type=ATG;rbs_motif=AGxAGG/AGGxGG;rbs_spacer=5-10bp;gc_cont=0.413	SRVP_Atabeya-2_33	SR-VP_11_27_2022_S1_100cm_MT	1	30494	30631	138	11625022	0.623343	-	-	-	-	-	-	-	-
SRVP_Atabeya-2-AMLJHBDE_00340	SRVP_Atabeya-2_34 # 30666 # 31997 # -1 # ID=1_34;partial=00;start_type=ATG;rbs_motif=GGA/GAG/AGG;rbs_spacer=11-12bp;gc_cont=0.547	SRVP_Atabeya-2_34	SR-VP_11_27_2022_S1_100cm_MT	6	30666	31997	1332	11625022	0.387484	arCOG00683	-	Transposable_element,_IS605_OrfB_family,_contains_RNAse_H_fold_nuclease_and_Zn_finger_domains	X	COG0675	Transposase	X	-
SRVP_Atabeya-2-AMLJHBDE_00350	SRVP_Atabeya-2_35 # 32414 # 35404 # 1 # ID=1_35;partial=00;start_type=GTG;rbs_motif=GGAG/GAGG;rbs_spacer=5-10bp;gc_cont=0.467	SRVP_Atabeya-2_35	SR-VP_11_27_2022_S1_100cm_MT	8	32414	35404	2991	11625022	0.23008	arCOG00807	IleS	Isoleucyl-tRNA_synthetase	J	COG0060	Isoleucyl-tRNA_synthetase	J	Aminoacyl-tRNA_synthetases
SRVP_Atabeya-2-AMLJHBDE_00360	SRVP_Atabeya-2_36 # 35909 # 38080 # -1 # ID=1_36;partial=00;start_type=ATG;rbs_motif=GGA/GAG/AGG;rbs_spacer=5-10bp;gc_cont=0.491	SRVP_Atabeya-2_36	SR-VP_11_27_2022_S1_100cm_MT	273	35909	38080	2172	11625022	10.8121	-	-	-	-	COG4412	Bacillopeptidase_F,_M6_metalloprotease_family	O	-
SRVP_Atabeya-2-AMLJHBDE_00360	SRVP_Atabeya-2_36 # 35909 # 38080 # -1 # ID=1_36;partial=00;start_type=ATG;rbs_motif=GGA/GAG/AGG;rbs_spacer=5-10bp;gc_cont=0.491	SRVP_Atabeya-2_36	SR-VP_11_27_2022_S2_40cm_MT	1	35909	38080	2172	4025082	0.114384	-	-	-	-	COG4412	Bacillopeptidase_F,_M6_metalloprotease_family	O	-
SRVP_Atabeya-2-AMLJHBDE_00390	SRVP_Atabeya-2_39 # 40077 # 40322 # 1 # ID=1_39;partial=00;start_type=ATG;rbs_motif=AGGA/GGAG/GAGG;rbs_spacer=11-12bp;gc_cont=0.476	SRVP_Atabeya-2_39	SR-VP_11_27_2022_S1_100cm_MT	1	40077	40322	246	11625022	0.34968	-	-	-	-	-	-	-	-
SRVP_Atabeya-2-AMLJHBDE_00400	SRVP_Atabeya-2_40 # 40266 # 40652 # -1 # ID=1_40;partial=00;start_type=ATG;rbs_motif=GGA/GAG/AGG;rbs_spacer=5-10bp;gc_cont=0.452	SRVP_Atabeya-2_40	SR-VP_11_27_2022_S1_100cm_MT	1	40266	40652	387	11625022	0.222277	arCOG00292	NapF	Ferredoxin_domain_containing_protein	C	COG1145	Ferredoxin	C	-
SRVP_Atabeya-2-AMLJHBDE_00410	SRVP_Atabeya-2_41 # 40885 # 41379 # -1 # ID=1_41;partial=00;start_type=ATG;rbs_motif=3Base/5BMM;rbs_spacer=13-15bp;gc_cont=0.473	SRVP_Atabeya-2_41	SR-VP_11_27_2022_S1_100cm_MT	1	40885	41379	495	11625022	0.17378	arCOG01858	-	Predicted_HD_superfamily_hydrolase	R	COG1418	HD_superfamily_phosphodieaserase,_includes_HD_domain_of_RNase_Y	JR	-
SRVP_Atabeya-2-AMLJHBDE_00430	SRVP_Atabeya-2_43 # 42196 # 44499 # 1 # ID=1_43;partial=00;start_type=ATG;rbs_motif=GGxGG;rbs_spacer=5-10bp;gc_cont=0.502	SRVP_Atabeya-2_43	SR-VP_11_27_2022_S1_100cm_MT	3	42196	44499	2304	11625022	0.112007	arCOG04949	OVP1	Na+_or_H+-translocating_membrane_pyrophosphatase	C	COG3808	Na+_or_H+-translocating_membrane_pyrophosphatase	C	-
SRVP_Atabeya-2-AMLJHBDE_00440	SRVP_Atabeya-2_44 # 44690 # 47164 # -1 # ID=1_44;partial=00;start_type=ATG;rbs_motif=GGA/GAG/AGG;rbs_spacer=5-10bp;gc_cont=0.467	SRVP_Atabeya-2_44	SR-VP_11_27_2022_S1_100cm_MT	27	44690	47164	2475	11625022	0.938415	-	-	-	-	-	-	-	-
SRVP_Atabeya-2-AMLJHBDE_00450	SRVP_Atabeya-2_45 # 47329 # 48870 # -1 # ID=1_45;partial=00;start_type=TTG;rbs_motif=AGGAG/GGAGG;rbs_spacer=11-12bp;gc_cont=0.466	SRVP_Atabeya-2_45	SR-VP_11_27_2022_S1_100cm_MT	2	47329	48870	1542	11625022	0.111571	arCOG00025	XylB	Sugar_(pentulose_and_hexulose)_kinase	G	COG1070	Sugar_(pentulose_or_hexulose)_kinase	G	Non-phosphorylated_Entner-Doudoroff_pathway
SRVP_Atabeya-2-AMLJHBDE_00460	SRVP_Atabeya-2_46 # 49173 # 49307 # 1 # ID=1_46;partial=00;start_type=ATG;rbs_motif=AGGAGG;rbs_spacer=11-12bp;gc_cont=0.370	SRVP_Atabeya-2_46	SR-VP_11_27_2022_S1_100cm_MT	4	49173	49307	135	11625022	2.54878	-	-	-	-	-	-	-	-
SRVP_Atabeya-2-AMLJHBDE_00470	SRVP_Atabeya-2_47 # 49312 # 49416 # -1 # ID=1_47;partial=00;start_type=ATG;rbs_motif=GGxGG;rbs_spacer=5-10bp;gc_cont=0.457	SRVP_Atabeya-2_47	SR-VP_11_27_2022_S1_100cm_MT	8	49312	49416	105	11625022	6.55401	-	-	-	-	-	-	-	-
SRVP_Atabeya-2-AMLJHBDE_00480	SRVP_Atabeya-2_48 # 49367 # 50452 # -1 # ID=1_48;partial=00;start_type=TTG;rbs_motif=None;rbs_spacer=None;gc_cont=0.441	SRVP_Atabeya-2_48	SR-VP_11_27_2022_S1_100cm_MT	6	49367	50452	1086	11625022	0.475256	-	-	-	-	-	-	-	-
SRVP_Atabeya-2-AMLJHBDE_00490	SRVP_Atabeya-2_49 # 50725 # 51441 # 1 # ID=1_49;partial=00;start_type=ATG;rbs_motif=GGA/GAG/AGG;rbs_spacer=3-4bp;gc_cont=0.452	SRVP_Atabeya-2_49	SR-VP_11_27_2022_S1_100cm_MT	4	50725	51441	717	11625022	0.479896	-	-	-	-	COG2909	ATP-,_maltotriose-_and_DNA-dependent_transcriptional_regulator_MalT	K	-
SRVP_Atabeya-2-AMLJHBDE_00540	SRVP_Atabeya-2_54 # 55646 # 58309 # 1 # ID=1_54;partial=00;start_type=ATG;rbs_motif=GGA/GAG/AGG;rbs_spacer=5-10bp;gc_cont=0.476	SRVP_Atabeya-2_54	SR-VP_11_27_2022_S1_100cm_MT	51	55646	58309	2664	11625022	1.6468	-	-	-	-	-	-	-	-
SRVP_Atabeya-2-AMLJHBDE_00560	SRVP_Atabeya-2_56 # 59377 # 61233 # 1 # ID=1_56;partial=00;start_type=ATG;rbs_motif=GGA/GAG/AGG;rbs_spacer=5-10bp;gc_cont=0.470	SRVP_Atabeya-2_56	SR-VP_11_27_2022_S1_100cm_MT	5	59377	61233	1857	11625022	0.231614	arCOG00057	GlmS	Glucosamine_6-phosphate_synthetase	M	COG0449	Glucosamine_6-phosphate_synthetase,_contains_amidotransferase_and_phosphosugar_isomerase_domains	M	-
SRVP_Atabeya-2-AMLJHBDE_00580	SRVP_Atabeya-2_58 # 62455 # 62808 # 1 # ID=1_58;partial=00;start_type=TTG;rbs_motif=AGGAG/GGAGG;rbs_spacer=11-12bp;gc_cont=0.489	SRVP_Atabeya-2_58	SR-VP_11_27_2022_S1_100cm_MT	2	62455	62808	354	11625022	0.485996	arCOG04327	RPS25	Ribosomal_protein_S25	J	COG4901	Ribosomal_protein_S25e	J	Archaeal_ribosomal_proteins
SRVP_Atabeya-2-AMLJHBDE_00610	SRVP_Atabeya-2_61 # 64989 # 66293 # -1 # ID=1_61;partial=00;start_type=ATG;rbs_motif=GGxGG;rbs_spacer=11-12bp;gc_cont=0.470	SRVP_Atabeya-2_61	SR-VP_11_27_2022_S1_100cm_MT	4	64989	66293	1305	11625022	0.263667	arCOG01229	-	Cyclic_2,_3-diphosphoglycerate_synthetase	Q	COG2403	Zn/Ni/Co-binding_GTPase_YjiA,_predicted_metallochaperone,_CobW/Nha3/YciC_family	P	-
SRVP_Atabeya-2-AMLJHBDE_00700	SRVP_Atabeya-2_70 # 72521 # 73801 # 1 # ID=1_70;partial=00;start_type=GTG;rbs_motif=AGGAG;rbs_spacer=5-10bp;gc_cont=0.488	SRVP_Atabeya-2_70	SR-VP_11_27_2022_S1_100cm_MT	5	72521	73801	1281	11625022	0.335759	arCOG01280	PaaJ	Acetyl-CoA_acetyltransferase	I	COG0183	Acetyl-CoA_acetyltransferase	I	Fatty_acid_biosynthesis
SRVP_Atabeya-2-AMLJHBDE_00710	SRVP_Atabeya-2_71 # 73825 # 74307 # 1 # ID=1_71;partial=00;start_type=ATG;rbs_motif=AGGAG/GGAGG;rbs_spacer=11-12bp;gc_cont=0.464	SRVP_Atabeya-2_71	SR-VP_11_27_2022_S1_100cm_MT	10	73825	74307	483	11625022	1.78098	arCOG01287	-	OB-fold_domain_and_Zn-ribbon_containing_protein,_possible_acyl-CoA-binding_protein	R	COG1545	Uncharacterized_OB-fold_protein,_contains_Zn-ribbon_domain	R	-
SRVP_Atabeya-2-AMLJHBDE_00740	SRVP_Atabeya-2_74 # 76229 # 78052 # 1 # ID=1_74;partial=00;start_type=ATG;rbs_motif=AGGAG;rbs_spacer=5-10bp;gc_cont=0.470	SRVP_Atabeya-2_74	SR-VP_11_27_2022_S1_100cm_MT	8	76229	78052	1824	11625022	0.377287	-	-	-	-	COG1361	S-layer_protein_MJ0795,_predicted_component_of_type_IV_pili-like_system	R	-
SRVP_Atabeya-2-AMLJHBDE_00780	SRVP_Atabeya-2_78 # 80410 # 82683 # 1 # ID=1_78;partial=00;start_type=ATG;rbs_motif=GGA/GAG/AGG;rbs_spacer=5-10bp;gc_cont=0.452	SRVP_Atabeya-2_78	SR-VP_11_27_2022_S1_100cm_MT	1	80410	82683	2274	11625022	0.0378282	-	-	-	-	-	-	-	-
SRVP_Atabeya-2-AMLJHBDE_00800	SRVP_Atabeya-2_80 # 84259 # 84786 # -1 # ID=1_80;partial=00;start_type=ATG;rbs_motif=GGA/GAG/AGG;rbs_spacer=5-10bp;gc_cont=0.453	SRVP_Atabeya-2_80	SR-VP_11_27_2022_S1_100cm_MT	2	84259	84786	528	11625022	0.325838	arCOG01849	PaaY	Isoleucine_patch_superfamily_protein	R	COG0663	Carbonic_anhydrase_or_acetyltransferase,_isoleucine_patch_superfamily	R	-
SRVP_Atabeya-2-AMLJHBDE_00860	SRVP_Atabeya-2_86 # 88879 # 89394 # 1 # ID=1_86;partial=00;start_type=TTG;rbs_motif=GGxGG;rbs_spacer=5-10bp;gc_cont=0.450	SRVP_Atabeya-2_86	SR-VP_11_27_2022_S1_100cm_MT	1	88879	89394	516	11625022	0.166708	arCOG10401	-	L-2-amino-thiazoline-4-carboxylic_acid_hydrolase	E	-	-	-	-
SRVP_Atabeya-2-AMLJHBDE_00870	SRVP_Atabeya-2_87 # 89493 # 90512 # -1 # ID=1_87;partial=00;start_type=TTG;rbs_motif=AGxAGG/AGGxGG;rbs_spacer=5-10bp;gc_cont=0.460	SRVP_Atabeya-2_87	SR-VP_11_27_2022_S1_100cm_MT	2	89493	90512	1020	11625022	0.168669	arCOG01726	IspA	Geranylgeranyl_pyrophosphate_synthase	H	COG0142	Geranylgeranyl_pyrophosphate_synthase	H	Isoprenoid_biosynthesis
SRVP_Atabeya-2-AMLJHBDE_00900	SRVP_Atabeya-2_90 # 92878 # 93675 # -1 # ID=1_90;partial=00;start_type=GTG;rbs_motif=AGxAGG/AGGxGG;rbs_spacer=5-10bp;gc_cont=0.455	SRVP_Atabeya-2_90	SR-VP_11_27_2022_S1_100cm_MT	4	92878	93675	798	11625022	0.431185	arCOG02037	-	Sugar-specific_transcriptional_regulator_TrmB	K	COG1378	Sugar-specific_transcriptional_regulator_TrmB	K	-
SRVP_Atabeya-2-AMLJHBDE_00950	SRVP_Atabeya-2_95 # 95815 # 96207 # -1 # ID=1_95;partial=00;start_type=GTG;rbs_motif=GGA/GAG/AGG;rbs_spacer=11-12bp;gc_cont=0.440	SRVP_Atabeya-2_95	SR-VP_11_27_2022_S1_100cm_MT	4	95815	96207	393	11625022	0.875535	arCOG03572	-	Uncharacterized_protein,_DUF3795_family	S	-	-	-	-
SRVP_Atabeya-2-AMLJHBDE_00980	SRVP_Atabeya-2_98 # 97998 # 99140 # -1 # ID=1_98;partial=00;start_type=ATG;rbs_motif=None;rbs_spacer=None;gc_cont=0.474	SRVP_Atabeya-2_98	SR-VP_11_27_2022_S1_100cm_MT	1	97998	99140	1143	11625022	0.0752593	-	-	-	-	COG0503	Adenine/guanine_phosphoribosyltransferase_or_related_PRPP-binding_protein	F	Purine_salvage
SRVP_Atabeya-2-AMLJHBDE_00990	SRVP_Atabeya-2_99 # 99097 # 100113 # -1 # ID=1_99;partial=00;start_type=ATG;rbs_motif=GGxGG;rbs_spacer=5-10bp;gc_cont=0.463	SRVP_Atabeya-2_99	SR-VP_11_27_2022_S1_100cm_MT	2	99097	100113	1017	11625022	0.169167	-	-	-	-	-	-	-	-
SRVP_Atabeya-2-AMLJHBDE_01080	SRVP_Atabeya-2_108 # 105351 # 106307 # 1 # ID=1_108;partial=00;start_type=ATG;rbs_motif=GGA/GAG/AGG;rbs_spacer=5-10bp;gc_cont=0.446	SRVP_Atabeya-2_108	SR-VP_11_27_2022_S1_100cm_MT	1	105351	106307	957	11625022	0.0898865	-	-	-	-	-	-	-	-
SRVP_Atabeya-2-AMLJHBDE_01110	SRVP_Atabeya-2_111 # 110148 # 111869 # 1 # ID=1_111;partial=00;start_type=ATG;rbs_motif=GGAG/GAGG;rbs_spacer=5-10bp;gc_cont=0.477	SRVP_Atabeya-2_111	SR-VP_11_27_2022_S1_100cm_MT	10	110148	111869	1722	11625022	0.499543	arCOG03038	-	TPR_repeats_containing_protein	R	COG3914	Predicted_O-linked_N-acetylglucosamine_transferase,_SPINDLY_family	O	-
SRVP_Atabeya-2-AMLJHBDE_01170	SRVP_Atabeya-2_117 # 115837 # 116034 # 1 # ID=1_117;partial=00;start_type=ATG;rbs_motif=AGGAGG;rbs_spacer=5-10bp;gc_cont=0.449	SRVP_Atabeya-2_117	SR-VP_11_27_2022_S1_100cm_MT	1	115837	116034	198	11625022	0.434451	-	-	-	-	-	-	-	-
SRVP_Atabeya-2-AMLJHBDE_01180	SRVP_Atabeya-2_118 # 116031 # 117239 # 1 # ID=1_118;partial=00;start_type=ATG;rbs_motif=GGAG/GAGG;rbs_spacer=5-10bp;gc_cont=0.495	SRVP_Atabeya-2_118	SR-VP_11_27_2022_S1_100cm_MT	1	116031	117239	1209	11625022	0.0711508	arCOG00130	-	MFS_family_permease	G	COG2814	Predicted_arabinose_efflux_permease_AraJ,_MFS_family	G	-
SRVP_Atabeya-2-AMLJHBDE_01200	SRVP_Atabeya-2_120 # 118416 # 120170 # 1 # ID=1_120;partial=00;start_type=ATG;rbs_motif=AGGA/GGAG/GAGG;rbs_spacer=11-12bp;gc_cont=0.461	SRVP_Atabeya-2_120	SR-VP_11_27_2022_S1_100cm_MT	2	118416	120170	1755	11625022	0.09803	arCOG11614	-	Uncharacterized_protein	S	COG1100	GTPase_SAR1_family_domain	R	-
SRVP_Atabeya-2-AMLJHBDE_01250	SRVP_Atabeya-2_125 # 122957 # 123115 # -1 # ID=1_125;partial=00;start_type=TTG;rbs_motif=AGGAG;rbs_spacer=5-10bp;gc_cont=0.497	SRVP_Atabeya-2_125	SR-VP_11_27_2022_S1_100cm_MT	2	122957	123115	159	11625022	1.08203	-	-	-	-	-	-	-	-
SRVP_Atabeya-2-AMLJHBDE_01270	SRVP_Atabeya-2_127 # 125077 # 126300 # 1 # ID=1_127;partial=00;start_type=TTG;rbs_motif=3Base/5BMM;rbs_spacer=13-15bp;gc_cont=0.449	SRVP_Atabeya-2_127	SR-VP_11_27_2022_S1_40cm_MT	1	125077	126300	1224	1473124	0.554599	-	-	-	-	COG2512	Predicted_transcriptional_regulator,_contains_CW_(cell_wall-binding)_repeats_and_an_HTH_domain	R	-
SRVP_Atabeya-2-AMLJHBDE_01280	SRVP_Atabeya-2_128 # 126756 # 128882 # 1 # ID=1_128;partial=00;start_type=ATG;rbs_motif=None;rbs_spacer=None;gc_cont=0.463	SRVP_Atabeya-2_128	SR-VP_11_27_2022_S1_100cm_MT	1	126756	128882	2127	11625022	0.0404426	-	-	-	-	-	-	-	-
SRVP_Atabeya-2-AMLJHBDE_01290	SRVP_Atabeya-2_129 # 129145 # 131349 # -1 # ID=1_129;partial=00;start_type=TTG;rbs_motif=GGAGG;rbs_spacer=5-10bp;gc_cont=0.468	SRVP_Atabeya-2_129	SR-VP_11_27_2022_S1_100cm_MT	3	129145	131349	2205	11625022	0.117036	arCOG01559	FusA	Translation_elongation_factor_G,_EF-G_(GTPase)	J	COG0480	Translation_elongation_factor_EF-G,_a_GTPase	J	Translation_factors
SRVP_Atabeya-2-AMLJHBDE_01310	SRVP_Atabeya-2_131 # 132116 # 134404 # 1 # ID=1_131;partial=00;start_type=ATG;rbs_motif=4Base/6BMM;rbs_spacer=13-15bp;gc_cont=0.483	SRVP_Atabeya-2_131	SR-VP_11_27_2022_S1_100cm_MT	1	132116	134404	2289	11625022	0.0375803	arCOG01187	HypF	Hydrogenase_maturation_factor	O	COG0068	Hydrogenase_maturation_factor_HypF_(carbamoyltransferase)	O	-
SRVP_Atabeya-2-AMLJHBDE_01390	SRVP_Atabeya-2_139 # 140140 # 140940 # -1 # ID=1_139;partial=00;start_type=TTG;rbs_motif=GGAGG;rbs_spacer=5-10bp;gc_cont=0.433	SRVP_Atabeya-2_139	SR-VP_11_27_2022_S1_100cm_MT	3	140140	140940	801	11625022	0.322177	arCOG01462	NatB	ABC-type_Na+_efflux_pump,_permease_component	C	COG1668	ABC-type_Na+_efflux_pump,_permease_component_NatB	CP	-
SRVP_Atabeya-2-AMLJHBDE_01400	SRVP_Atabeya-2_140 # 140955 # 141908 # -1 # ID=1_140;partial=00;start_type=ATG;rbs_motif=GGAG/GAGG;rbs_spacer=5-10bp;gc_cont=0.465	SRVP_Atabeya-2_140	SR-VP_11_27_2022_S1_100cm_MT	2	140955	141908	954	11625022	0.180338	arCOG00196	CcmA	ABC-type_multidrug_transport_system,_ATPase_component	V	COG4152	ABC-type_uncharacterized_transport_system,_ATPase_component	R	-
SRVP_Atabeya-2-AMLJHBDE_01490	SRVP_Atabeya-2_149 # 149437 # 151146 # 1 # ID=1_149;partial=00;start_type=ATG;rbs_motif=AGGA/GGAG/GAGG;rbs_spacer=11-12bp;gc_cont=0.471	SRVP_Atabeya-2_149	SR-VP_11_27_2022_S1_100cm_MT	6	149437	151146	1710	11625022	0.301829	arCOG00856	CaiC	Acyl-CoA_synthetase_(AMP-forming)/AMP-acid_ligase_II	I	COG0365	Acyl-coenzyme_A_synthetase/AMP-(fatty)_acid_ligase	I	-
SRVP_Atabeya-2-AMLJHBDE_01500	SRVP_Atabeya-2_150 # 151221 # 151685 # -1 # ID=1_150;partial=00;start_type=GTG;rbs_motif=GGA/GAG/AGG;rbs_spacer=11-12bp;gc_cont=0.454	SRVP_Atabeya-2_150	SR-VP_11_27_2022_S1_100cm_MT	1	151221	151685	465	11625022	0.184992	-	-	-	-	COG1100	GTPase_SAR1_family_domain	R	-
SRVP_Atabeya-2-AMLJHBDE_01530	SRVP_Atabeya-2_153 # 152905 # 153408 # -1 # ID=1_153;partial=00;start_type=ATG;rbs_motif=GGA/GAG/AGG;rbs_spacer=5-10bp;gc_cont=0.437	SRVP_Atabeya-2_153	SR-VP_11_27_2022_S1_100cm_MT	5	152905	153408	504	11625022	0.853386	arCOG10427	-	Chromate_resistance_protein	P	COG4275	Chromate_resistance_protein_ChrB1	P	-
SRVP_Atabeya-2-AMLJHBDE_01600	SRVP_Atabeya-2_160 # 160575 # 162800 # -1 # ID=1_160;partial=00;start_type=GTG;rbs_motif=GGAGG;rbs_spacer=5-10bp;gc_cont=0.479	SRVP_Atabeya-2_160	SR-VP_11_27_2022_S1_100cm_MT	1	160575	162800	2226	11625022	0.0386439	arCOG00641	PurL	Phosphoribosylformylglycinamidine_(FGAM)_synthase,_synthetase_domain	F	COG0046	Phosphoribosylformylglycinamidine_(FGAM)_synthase,_synthetase_domain	F	Purine_biosynthesis
SRVP_Atabeya-2-AMLJHBDE_01660	SRVP_Atabeya-2_166 # 167053 # 168324 # -1 # ID=1_166;partial=00;start_type=TTG;rbs_motif=GGxGG;rbs_spacer=5-10bp;gc_cont=0.472	SRVP_Atabeya-2_166	SR-VP_11_27_2022_S1_100cm_MT	1	167053	168324	1272	11625022	0.0676268	arCOG01107	ArgE	Acetylornithine_deacetylase/Succinyl-diaminopimelate_desuccinylase_or_related_deacylase	E	COG0624	Acetylornithine_deacetylase/Succinyl-diaminopimelate_desuccinylase_or_related_deacylase	E	Arginine_biosynthesis
SRVP_Atabeya-2-AMLJHBDE_01680	SRVP_Atabeya-2_168 # 168802 # 169806 # 1 # ID=1_168;partial=00;start_type=ATG;rbs_motif=GGA/GAG/AGG;rbs_spacer=5-10bp;gc_cont=0.479	SRVP_Atabeya-2_168	SR-VP_11_27_2022_S1_100cm_MT	1	168802	169806	1005	11625022	0.0855934	-	-	-	-	-	-	-	-
SRVP_Atabeya-2-AMLJHBDE_01710	SRVP_Atabeya-2_171 # 172812 # 173684 # -1 # ID=1_171;partial=00;start_type=ATG;rbs_motif=GGxGG;rbs_spacer=5-10bp;gc_cont=0.487	SRVP_Atabeya-2_171	SR-VP_11_27_2022_S1_100cm_MT	1	172812	173684	873	11625022	0.0985353	-	-	-	-	-	-	-	-
SRVP_Atabeya-2-AMLJHBDE_01790	SRVP_Atabeya-2_179 # 178232 # 178783 # 1 # ID=1_179;partial=00;start_type=ATG;rbs_motif=GGA/GAG/AGG;rbs_spacer=5-10bp;gc_cont=0.475	SRVP_Atabeya-2_179	SR-VP_11_27_2022_S1_100cm_MT	6	178232	178783	552	11625022	0.935015	arCOG00362	Srp102	Signal_recognition_particle_receptor_subunit_beta,_a_GTPase	U	COG1100	GTPase_SAR1_family_domain	R	-
SRVP_Atabeya-2-AMLJHBDE_01840	SRVP_Atabeya-2_184 # 182459 # 182983 # -1 # ID=1_184;partial=00;start_type=TTG;rbs_motif=GGAGG;rbs_spacer=5-10bp;gc_cont=0.490	SRVP_Atabeya-2_184	SR-VP_11_27_2022_S1_100cm_MT	1	182459	182983	525	11625022	0.16385	-	-	-	-	-	-	-	-
SRVP_Atabeya-2-AMLJHBDE_01880	SRVP_Atabeya-2_188 # 186258 # 187691 # 1 # ID=1_188;partial=00;start_type=ATG;rbs_motif=GGAG/GAGG;rbs_spacer=5-10bp;gc_cont=0.471	SRVP_Atabeya-2_188	SR-VP_11_27_2022_S1_100cm_MT	2	186258	187691	1434	11625022	0.119974	arCOG02650	FrhB	Coenzyme_F420-reducing_hydrogenase,_beta_subunit	C	COG1035	Coenzyme_F420-reducing_hydrogenase,_beta_subunit	C	-
SRVP_Atabeya-2-AMLJHBDE_01900	SRVP_Atabeya-2_190 # 188571 # 188801 # -1 # ID=1_190;partial=00;start_type=GTG;rbs_motif=AGGA/GGAG/GAGG;rbs_spacer=11-12bp;gc_cont=0.476	SRVP_Atabeya-2_190	SR-VP_11_27_2022_S1_100cm_MT	1	188571	188801	231	11625022	0.372387	arCOG01117	-	Lrp/AsnC_family_C-terminal_domain	K	COG1522	DNA-binding_transcriptional_regulator,_Lrp_family	K	-
SRVP_Atabeya-2-AMLJHBDE_01930	SRVP_Atabeya-2_193 # 190922 # 192754 # -1 # ID=1_193;partial=00;start_type=TTG;rbs_motif=GGxGG;rbs_spacer=5-10bp;gc_cont=0.478	SRVP_Atabeya-2_193	SR-VP_11_27_2022_S1_100cm_MT	10	190922	192754	1833	11625022	0.469293	-	-	-	-	-	-	-	-
SRVP_Atabeya-2-AMLJHBDE_01940	SRVP_Atabeya-2_194 # 193061 # 193471 # -1 # ID=1_194;partial=00;start_type=GTG;rbs_motif=GGA/GAG/AGG;rbs_spacer=5-10bp;gc_cont=0.440	SRVP_Atabeya-2_194	SR-VP_11_27_2022_S1_100cm_MT	21	193061	193471	411	11625022	4.39525	-	-	-	-	-	-	-	-
SRVP_Atabeya-2-AMLJHBDE_01960	SRVP_Atabeya-2_196 # 194969 # 195415 # -1 # ID=1_196;partial=00;start_type=ATG;rbs_motif=AGGAG/GGAGG;rbs_spacer=11-12bp;gc_cont=0.477	SRVP_Atabeya-2_196	SR-VP_11_27_2022_S1_100cm_MT	1	194969	195415	447	11625022	0.192441	-	-	-	-	-	-	-	-
SRVP_Atabeya-2-AMLJHBDE_01970	SRVP_Atabeya-2_197 # 195610 # 196383 # -1 # ID=1_197;partial=00;start_type=TTG;rbs_motif=GGAG/GAGG;rbs_spacer=5-10bp;gc_cont=0.468	SRVP_Atabeya-2_197	SR-VP_11_27_2022_S1_100cm_MT	1	195610	196383	774	11625022	0.111139	-	-	-	-	-	-	-	-
SRVP_Atabeya-2-AMLJHBDE_02030	SRVP_Atabeya-2_203 # 201714 # 202358 # 1 # ID=1_203;partial=00;start_type=TTG;rbs_motif=GGA/GAG/AGG;rbs_spacer=5-10bp;gc_cont=0.470	SRVP_Atabeya-2_203	SR-VP_11_27_2022_S1_100cm_MT	1	201714	202358	645	11625022	0.133366	arCOG01739	LepB	Signal_peptidase_I	U	COG2932	Phage_repressor_protein_C,_contains_Cro/C1-type_HTH_and_peptisase_s24_domains	X	-
SRVP_Atabeya-2-AMLJHBDE_02060	SRVP_Atabeya-2_206 # 204414 # 205409 # -1 # ID=1_206;partial=00;start_type=ATG;rbs_motif=AGGAG;rbs_spacer=5-10bp;gc_cont=0.497	SRVP_Atabeya-2_206	SR-VP_11_27_2022_S1_100cm_MT	4	204414	205409	996	11625022	0.345467	arCOG01981	SUA7	Transcription_initiation_factor_TFIIB,_Brf1_subunit/Transcription_initiation_factor_TFIIB	K	COG1405	Transcription_initiation_factor_TFIIIB,_Brf1_subunit/Transcription_initiation_factor_TFIIB	K	-
SRVP_Atabeya-2-AMLJHBDE_02070	SRVP_Atabeya-2_207 # 205626 # 206171 # -1 # ID=1_207;partial=00;start_type=TTG;rbs_motif=GGA/GAG/AGG;rbs_spacer=11-12bp;gc_cont=0.469	SRVP_Atabeya-2_207	SR-VP_11_27_2022_S1_100cm_MT	6	205626	206171	546	11625022	0.945289	arCOG00362	Srp102	Signal_recognition_particle_receptor_subunit_beta,_a_GTPase	U	COG1100	GTPase_SAR1_family_domain	R	-
SRVP_Atabeya-2-AMLJHBDE_02080	SRVP_Atabeya-2_208 # 206238 # 206963 # -1 # ID=1_208;partial=00;start_type=TTG;rbs_motif=AGGAGG;rbs_spacer=5-10bp;gc_cont=0.453	SRVP_Atabeya-2_208	SR-VP_11_27_2022_S1_100cm_MT	6	206238	206963	726	11625022	0.71092	arCOG01764	SPT15	TATA-box_binding_protein_(TBP),_component_of_TFIID_and_TFIIB	K	COG2101	TATA-box_binding_protein_(TBP),_component_of_TFIID_and_TFIIIB	K	-
SRVP_Atabeya-2-AMLJHBDE_02120	SRVP_Atabeya-2_212 # 209691 # 211040 # -1 # ID=1_212;partial=00;start_type=TTG;rbs_motif=GGAG/GAGG;rbs_spacer=5-10bp;gc_cont=0.479	SRVP_Atabeya-2_212	SR-VP_11_27_2022_S1_100cm_MT	12	209691	211040	1350	11625022	0.764634	arCOG00119	GadB	Glutamate_decarboxylase,_L-tyrosine_decarboxylase_or_related_PLP-dependent_protein	E	COG1921	Seryl-tRNA(Sec)_selenium_transferase	J	-
SRVP_Atabeya-2-AMLJHBDE_02180	SRVP_Atabeya-2_218 # 215530 # 216246 # -1 # ID=1_218;partial=00;start_type=ATG;rbs_motif=None;rbs_spacer=None;gc_cont=0.455	SRVP_Atabeya-2_218	SR-VP_11_27_2022_S1_100cm_MT	2	215530	216246	717	11625022	0.239948	arCOG01701	SEN2	tRNA_splicing_endonuclease	J	COG1676	tRNA_splicing_endonuclease_subunit_SEN34	J	tRNA_modification
SRVP_Atabeya-2-AMLJHBDE_02230	SRVP_Atabeya-2_223 # 219111 # 220829 # 1 # ID=1_223;partial=00;start_type=TTG;rbs_motif=GGxGG;rbs_spacer=5-10bp;gc_cont=0.492	SRVP_Atabeya-2_223	SR-VP_11_27_2022_S2_40cm_MT	1	219111	220829	1719	4025082	0.144527	arCOG04670	HutU	Urocanate_hydratase	E	COG2987	Urocanate_hydratase	E	-
SRVP_Atabeya-2-AMLJHBDE_02230	SRVP_Atabeya-2_223 # 219111 # 220829 # 1 # ID=1_223;partial=00;start_type=TTG;rbs_motif=GGxGG;rbs_spacer=5-10bp;gc_cont=0.492	SRVP_Atabeya-2_223	SR-VP_11_27_2022_S1_60cm_MT	1	219111	220829	1719	1990488	0.292257	arCOG04670	HutU	Urocanate_hydratase	E	COG2987	Urocanate_hydratase	E	-
SRVP_Atabeya-2-AMLJHBDE_02250	SRVP_Atabeya-2_225 # 221335 # 222228 # 1 # ID=1_225;partial=00;start_type=ATG;rbs_motif=GGAG/GAGG;rbs_spacer=5-10bp;gc_cont=0.479	SRVP_Atabeya-2_225	SR-VP_07_25_2022_A4_70cm_MT	1	221335	222228	894	19546	57.2275	arCOG00021	ThiN	Thiamine-phosphate_synthase_and_thiamin_biosynthesis_regulator_ThiR	H	COG1992	Predicted_transcriptional_regulator_fused_phosphomethylpyrimidine_kinase_(thiamin_biosynthesis)	R	-
SRVP_Atabeya-2-AMLJHBDE_02250	SRVP_Atabeya-2_225 # 221335 # 222228 # 1 # ID=1_225;partial=00;start_type=ATG;rbs_motif=GGAG/GAGG;rbs_spacer=5-10bp;gc_cont=0.479	SRVP_Atabeya-2_225	SR-VP_11_27_2022_S1_100cm_MT	1	221335	222228	894	11625022	0.0962207	arCOG00021	ThiN	Thiamine-phosphate_synthase_and_thiamin_biosynthesis_regulator_ThiR	H	COG1992	Predicted_transcriptional_regulator_fused_phosphomethylpyrimidine_kinase_(thiamin_biosynthesis)	R	-
SRVP_Atabeya-2-AMLJHBDE_02280	SRVP_Atabeya-2_228 # 224350 # 225888 # 1 # ID=1_228;partial=00;start_type=ATG;rbs_motif=AGGAGG;rbs_spacer=5-10bp;gc_cont=0.474	SRVP_Atabeya-2_228	SR-VP_11_27_2022_S1_100cm_MT	3	224350	225888	1539	11625022	0.167683	arCOG04671	HutH	Histidine_ammonia-lyase	E	COG2986	Histidine_ammonia-lyase	E	-
SRVP_Atabeya-2-AMLJHBDE_02290	SRVP_Atabeya-2_229 # 225920 # 227185 # -1 # ID=1_229;partial=00;start_type=ATG;rbs_motif=GGA/GAG/AGG;rbs_spacer=11-12bp;gc_cont=0.466	SRVP_Atabeya-2_229	SR-VP_11_27_2022_S1_100cm_MT	10	225920	227185	1266	11625022	0.679473	arCOG00696	HutI	Imidazolonepropionase_or_related_amidohydrolase	Q	COG1228	Imidazolonepropionase_or_related_amidohydrolase	Q	-
SRVP_Atabeya-2-AMLJHBDE_02300	SRVP_Atabeya-2_230 # 227216 # 228544 # -1 # ID=1_230;partial=00;start_type=ATG;rbs_motif=GGAG/GAGG;rbs_spacer=5-10bp;gc_cont=0.460	SRVP_Atabeya-2_230	SR-VP_11_27_2022_S1_100cm_MT	5	227216	228544	1329	11625022	0.323632	arCOG01909	GlnA	Glutamine_synthetase	E	COG0174	Glutamine_synthetase	E	Glutamine_biosynthesis
SRVP_Atabeya-2-AMLJHBDE_02310	SRVP_Atabeya-2_231 # 228694 # 229608 # 1 # ID=1_231;partial=00;start_type=ATG;rbs_motif=GGA/GAG/AGG;rbs_spacer=5-10bp;gc_cont=0.470	SRVP_Atabeya-2_231	SR-VP_11_27_2022_S1_100cm_MT	1	228694	229608	915	11625022	0.0940124	arCOG02695	Ftr	Formylmethanofuran:tetrahydromethanopterin_formyltransferase	C	COG2037	Formylmethanofuran:tetrahydromethanopterin_formyltransferase	C	-
SRVP_Atabeya-2-AMLJHBDE_02320	SRVP_Atabeya-2_232 # 229833 # 230039 # 1 # ID=1_232;partial=00;start_type=ATG;rbs_motif=GGA/GAG/AGG;rbs_spacer=11-12bp;gc_cont=0.459	SRVP_Atabeya-2_232	SR-VP_11_27_2022_S1_100cm_MT	1	229833	230039	207	11625022	0.415562	-	-	-	-	-	-	-	-
SRVP_Atabeya-2-AMLJHBDE_02330	SRVP_Atabeya-2_233 # 230348 # 231490 # 1 # ID=1_233;partial=00;start_type=TTG;rbs_motif=GGAG/GAGG;rbs_spacer=5-10bp;gc_cont=0.458	SRVP_Atabeya-2_233	SR-VP_11_27_2022_S1_100cm_MT	6	230348	231490	1143	11625022	0.451556	arCOG00052	Pgi	Glucose-6-phosphate_isomerase	G	COG2222	Fructoselysine-6-P-deglycase_FrlB_or_related_protein,_duplicated_sugar_isomerase_(SIS)_domain	M	-
SRVP_Atabeya-2-AMLJHBDE_02400	SRVP_Atabeya-2_240 # 238181 # 241822 # -1 # ID=1_240;partial=00;start_type=TTG;rbs_motif=GGAG/GAGG;rbs_spacer=5-10bp;gc_cont=0.473	SRVP_Atabeya-2_240	SR-VP_11_27_2022_S1_100cm_MT	7	238181	241822	3642	11625022	0.165335	arCOG00702	AprE	Predicted_multidomain_toxin,_contains_peptidase_S8_domain,_delivery_module_and_Rnase_A_domain	V	COG3225	ABC-type_uncharacterized_transport_system_involved_in_gliding_motility,_auxiliary_component	N	-
SRVP_Atabeya-2-AMLJHBDE_02440	SRVP_Atabeya-2_244 # 246475 # 247692 # 1 # ID=1_244;partial=00;start_type=GTG;rbs_motif=AGGAGG;rbs_spacer=5-10bp;gc_cont=0.477	SRVP_Atabeya-2_244	SR-VP_11_27_2022_S1_100cm_MT	1	246475	247692	1218	11625022	0.0706251	arCOG01130	-	Aspartate/tyrosine/aromatic_aminotransferase	E	COG0436	Aspartate/methionine/tyrosine_aminotransferase	E	Isoleucine,_leucine,_valine_biosynthesis
SRVP_Atabeya-2-AMLJHBDE_02460	SRVP_Atabeya-2_246 # 248972 # 250504 # -1 # ID=1_246;partial=00;start_type=ATG;rbs_motif=AGGA/GGAG/GAGG;rbs_spacer=11-12bp;gc_cont=0.476	SRVP_Atabeya-2_246	SR-VP_11_27_2022_S1_100cm_MT	11	248972	250504	1533	11625022	0.617244	arCOG04336	MtrH	Tetrahydromethanopterin_S-methyltransferase,_subunit_H	H	COG1962	Tetrahydromethanopterin_S-methyltransferase,_subunit_H	H	-
SRVP_Atabeya-2-AMLJHBDE_02500	SRVP_Atabeya-2_250 # 252158 # 252634 # 1 # ID=1_250;partial=00;start_type=TTG;rbs_motif=AGxAG;rbs_spacer=5-10bp;gc_cont=0.480	SRVP_Atabeya-2_250	SR-VP_11_27_2022_S1_100cm_MT	4	252158	252634	477	11625022	0.721353	arCOG01344	RPS19A	Ribosomal_protein_S19E_(S16A)	J	COG2238	Ribosomal_protein_S19E_(S16A)	J	Archaeal_ribosomal_proteins
SRVP_Atabeya-2-AMLJHBDE_02580	SRVP_Atabeya-2_258 # 256776 # 257708 # 1 # ID=1_258;partial=00;start_type=ATG;rbs_motif=AGGAG/GGAGG;rbs_spacer=11-12bp;gc_cont=0.456	SRVP_Atabeya-2_258	SR-VP_11_27_2022_S1_100cm_MT	1	256776	257708	933	11625022	0.0921987	arCOG00912	ArgF	Ornithine_carbamoyltransferase	E	COG0078	Ornithine_carbamoyltransferase	E	Arginine_biosynthesis
SRVP_Atabeya-2-AMLJHBDE_02630	SRVP_Atabeya-2_263 # 260189 # 260995 # 1 # ID=1_263;partial=00;start_type=ATG;rbs_motif=GGAGG;rbs_spacer=5-10bp;gc_cont=0.450	SRVP_Atabeya-2_263	SR-VP_11_27_2022_S1_60cm_MT	1	260189	260995	807	1990488	0.622539	arCOG04288	RplJ	Ribosomal_protein_L10	J	COG0244	Ribosomal_protein_L10	J	Ribosome_50S_subunit
SRVP_Atabeya-2-AMLJHBDE_02650	SRVP_Atabeya-2_265 # 261496 # 264171 # -1 # ID=1_265;partial=00;start_type=ATG;rbs_motif=GGxGG;rbs_spacer=5-10bp;gc_cont=0.468	SRVP_Atabeya-2_265	SR-VP_11_27_2022_S1_100cm_MT	1	261496	264171	2676	11625022	0.0321455	arCOG01255	AlaS	Alanyl-tRNA_synthetase	J	COG0013	Alanyl-tRNA_synthetase	J	Aminoacyl-tRNA_synthetases
SRVP_Atabeya-2-AMLJHBDE_02680	SRVP_Atabeya-2_268 # 265894 # 266127 # -1 # ID=1_268;partial=00;start_type=TTG;rbs_motif=AGGAGG;rbs_spacer=5-10bp;gc_cont=0.479	SRVP_Atabeya-2_268	SR-VP_11_27_2022_S1_100cm_MT	2	265894	266127	234	11625022	0.735225	arCOG05073	-	Predicted_nucleic-acid-binding_protein_containing_a_Zn-ribbon_domain	R	COG3478	Predicted_nucleic-acid-binding_protein,_contains_Zn-ribbon_domain	R	-
SRVP_Atabeya-2-AMLJHBDE_02770	SRVP_Atabeya-2_277 # 273335 # 274003 # 1 # ID=1_277;partial=00;start_type=GTG;rbs_motif=AGGAG/GGAGG;rbs_spacer=11-12bp;gc_cont=0.453	SRVP_Atabeya-2_277	SR-VP_11_27_2022_S1_100cm_MT	1	273335	274003	669	11625022	0.128582	arCOG00302	-	Metal-dependent_phosphoesterase_(PHP_family)	R	COG0613	5'-3'_exoribonuclease_TrpH/YciV_(RNase_AM),_contains_PHP_domain	F	-
SRVP_Atabeya-2-AMLJHBDE_02780	SRVP_Atabeya-2_278 # 274016 # 275248 # -1 # ID=1_278;partial=00;start_type=ATG;rbs_motif=GGA/GAG/AGG;rbs_spacer=5-10bp;gc_cont=0.516	SRVP_Atabeya-2_278	SR-VP_11_27_2022_S1_100cm_MT	13	274016	275248	1233	11625022	0.906957	arCOG02201	FtsZ1_2	Cell_division_GTPase	D	COG0206	Cell_division_GTPase_FtsZ	D	-
SRVP_Atabeya-2-AMLJHBDE_02790	SRVP_Atabeya-2_279 # 275300 # 275488 # -1 # ID=1_279;partial=00;start_type=ATG;rbs_motif=GGA/GAG/AGG;rbs_spacer=5-10bp;gc_cont=0.429	SRVP_Atabeya-2_279	SR-VP_11_27_2022_S1_100cm_MT	3	275300	275488	189	11625022	1.36542	arCOG01009	-	Transcriptional_regulator,_contains_N-terminal_RHH_domain	K	COG3609	Transcriptional_regulator,_contains_Arc/MetJ-type_RHH_(ribbon-helix-helix)_DNA-binding_domain	K	-
SRVP_Atabeya-2-AMLJHBDE_02800	SRVP_Atabeya-2_280 # 275900 # 276208 # -1 # ID=1_280;partial=00;start_type=ATG;rbs_motif=None;rbs_spacer=None;gc_cont=0.453	SRVP_Atabeya-2_280	SR-VP_11_27_2022_S1_100cm_MT	6	275900	276208	309	11625022	1.67032	arCOG00536	MoaD	Molybdopterin_converting_factor,_small_subunit	H	COG1977	Molybdopterin_synthase_sulfur_carrier_subunit_MoaD	H	Molybdopterin_biosynthesis
SRVP_Atabeya-2-AMLJHBDE_02850	SRVP_Atabeya-2_285 # 282107 # 283450 # 1 # ID=1_285;partial=00;start_type=ATG;rbs_motif=GGAG/GAGG;rbs_spacer=5-10bp;gc_cont=0.479	SRVP_Atabeya-2_285	SR-VP_11_27_2022_S1_100cm_MT	1	282107	283450	1344	11625022	0.064004	arCOG00918	HemL	Glutamate-1-semialdehyde_aminotransferase	H	COG0001	Glutamate-1-semialdehyde_aminotransferase	H	Heme_biosynthesis
SRVP_Atabeya-2-AMLJHBDE_03070	SRVP_Atabeya-2_307 # 302269 # 303240 # -1 # ID=1_307;partial=00;start_type=ATG;rbs_motif=AGGAGG;rbs_spacer=5-10bp;gc_cont=0.478	SRVP_Atabeya-2_307	SR-VP_11_27_2022_S1_100cm_MT	2	302269	303240	972	11625022	0.176999	arCOG04627	WcaG	Nucleoside-diphosphate-sugar_epimerase	M	COG0451	Nucleoside-diphosphate-sugar_epimerase	M	-
SRVP_Atabeya-2-AMLJHBDE_03080	SRVP_Atabeya-2_308 # 303681 # 305927 # 1 # ID=1_308;partial=00;start_type=ATG;rbs_motif=GGA/GAG/AGG;rbs_spacer=5-10bp;gc_cont=0.468	SRVP_Atabeya-2_308	SR-VP_11_27_2022_S2_40cm_MT	1	303681	305927	2247	4025082	0.110566	arCOG02895	MutS2	DNA_structure-specific_ATPase_involved_in_suppression_of_recombination,_MutS_family	L	COG1193	dsDNA-specific_endonuclease/ATPase_MutS2	L	-
SRVP_Atabeya-2-AMLJHBDE_03150	SRVP_Atabeya-2_315 # 311092 # 311721 # 1 # ID=1_315;partial=00;start_type=ATG;rbs_motif=GGA/GAG/AGG;rbs_spacer=11-12bp;gc_cont=0.456	SRVP_Atabeya-2_315	SR-VP_11_27_2022_S1_100cm_MT	5	311092	311721	630	11625022	0.682709	arCOG00970	PRE1	20S_proteasome,_beta_subunit	O	COG0638	20S_proteasome,_alpha_and_beta_subunits	O	-
SRVP_Atabeya-2-AMLJHBDE_03320	SRVP_Atabeya-2_332 # 325031 # 325471 # -1 # ID=1_332;partial=00;start_type=ATG;rbs_motif=GGxGG;rbs_spacer=11-12bp;gc_cont=0.467	SRVP_Atabeya-2_332	SR-VP_11_27_2022_S1_100cm_MT	6	325031	325471	441	11625022	1.17036	-	-	-	-	-	-	-	-
SRVP_Atabeya-2-AMLJHBDE_03380	SRVP_Atabeya-2_338 # 328681 # 329577 # 1 # ID=1_338;partial=00;start_type=TTG;rbs_motif=GGAGG;rbs_spacer=5-10bp;gc_cont=0.472	SRVP_Atabeya-2_338	SR-VP_11_27_2022_S1_100cm_MT	1	328681	329577	897	11625022	0.0958989	arCOG00016	RbsK	Sugar_kinase,_ribokinase_family	G	COG0524	Sugar_or_nucleoside_kinase,_ribokinase_family	G	Glycolysis
SRVP_Atabeya-2-AMLJHBDE_03390	SRVP_Atabeya-2_339 # 329608 # 329955 # -1 # ID=1_339;partial=00;start_type=TTG;rbs_motif=GGAG/GAGG;rbs_spacer=5-10bp;gc_cont=0.445	SRVP_Atabeya-2_339	SR-VP_11_27_2022_S1_100cm_MT	1	329608	329955	348	11625022	0.247188	arCOG00002	-	Transcriptional_regulator,_PadR_family	K	COG1695	DNA-binding_transcriptional_regulator,_PadR_family	K	-
SRVP_Atabeya-2-AMLJHBDE_03410	SRVP_Atabeya-2_341 # 331398 # 331850 # -1 # ID=1_341;partial=00;start_type=ATG;rbs_motif=None;rbs_spacer=None;gc_cont=0.464	SRVP_Atabeya-2_341	SR-VP_11_27_2022_S1_100cm_MT	1	331398	331850	453	11625022	0.189893	arCOG01285	-	OB-fold_domain_and_Zn-ribbon_containing_protein,_possible_acyl-CoA-binding_protein	R	COG1545	Uncharacterized_OB-fold_protein,_contains_Zn-ribbon_domain	R	-
SRVP_Atabeya-2-AMLJHBDE_03420	SRVP_Atabeya-2_342 # 331909 # 333093 # -1 # ID=1_342;partial=00;start_type=ATG;rbs_motif=4Base/6BMM;rbs_spacer=13-15bp;gc_cont=0.502	SRVP_Atabeya-2_342	SR-VP_11_27_2022_S1_100cm_MT	4	331909	333093	1185	11625022	0.290367	arCOG01767	PksG	3-hydroxy-3-methylglutaryl_CoA_synthase	I	COG3425	3-hydroxy-3-methylglutaryl_CoA_synthase	I	Isoprenoid_biosynthesis
SRVP_Atabeya-2-AMLJHBDE_03450	SRVP_Atabeya-2_345 # 334711 # 336141 # 1 # ID=1_345;partial=00;start_type=ATG;rbs_motif=GGAGG;rbs_spacer=5-10bp;gc_cont=0.453	SRVP_Atabeya-2_345	SR-VP_11_27_2022_S1_100cm_MT	7	334711	336141	1431	11625022	0.420789	arCOG00402	ProS	Prolyl-tRNA_synthetase	J	COG0442	Prolyl-tRNA_synthetase	J	Aminoacyl-tRNA_synthetases
SRVP_Atabeya-2-AMLJHBDE_03470	SRVP_Atabeya-2_347 # 336691 # 337284 # 1 # ID=1_347;partial=00;start_type=ATG;rbs_motif=GGAG/GAGG;rbs_spacer=5-10bp;gc_cont=0.556	SRVP_Atabeya-2_347	SR-VP_11_27_2022_S1_100cm_MT	15	336691	337284	594	11625022	2.17226	-	-	-	-	-	-	-	-
SRVP_Atabeya-2-AMLJHBDE_03570	SRVP_Atabeya-2_357 # 346610 # 347470 # -1 # ID=1_357;partial=00;start_type=ATG;rbs_motif=None;rbs_spacer=None;gc_cont=0.456	SRVP_Atabeya-2_357	SR-VP_11_27_2022_S1_100cm_MT	10	346610	347470	861	11625022	0.999086	-	-	-	-	-	-	-	-
SRVP_Atabeya-2-AMLJHBDE_03650	SRVP_Atabeya-2_365 # 352663 # 355404 # 1 # ID=1_365;partial=00;start_type=TTG;rbs_motif=GGAG/GAGG;rbs_spacer=5-10bp;gc_cont=0.446	SRVP_Atabeya-2_365	SR-VP_11_27_2022_S1_100cm_MT	6	352663	355404	2742	11625022	0.188231	arCOG15272	PolB1	DNA_polymerase_PolB1	L	COG0417	DNA_polymerase_B_elongation_subunit	L	-
SRVP_Atabeya-2-AMLJHBDE_03710	SRVP_Atabeya-2_371 # 363849 # 365585 # -1 # ID=1_371;partial=00;start_type=ATG;rbs_motif=GGAGG;rbs_spacer=5-10bp;gc_cont=0.467	SRVP_Atabeya-2_371	SR-VP_11_27_2022_S1_100cm_MT	2	363849	365585	1737	11625022	0.0990459	arCOG00280	-	HerA_helicase	L	COG0433	Archaeal_DNA_helicase_HerA_or_a_related_bacterial_ATPase,_contains_HAS-barrel_and_ATPase_domains	L	-
SRVP_Atabeya-2-AMLJHBDE_03790	SRVP_Atabeya-2_379 # 372658 # 373710 # -1 # ID=1_379;partial=00;start_type=ATG;rbs_motif=GGxGG;rbs_spacer=11-12bp;gc_cont=0.489	SRVP_Atabeya-2_379	SR-VP_11_27_2022_S1_100cm_MT	2	372658	373710	1053	11625022	0.163383	arCOG00982	GldA	Glycerol_dehydrogenase_or_related_enzyme	C	COG0371	Glycerol_dehydrogenase_or_related_enzyme,_iron-containing_ADH_family	C	Isoprenoid_biosynthesis
SRVP_Atabeya-2-AMLJHBDE_03810	SRVP_Atabeya-2_381 # 374721 # 376628 # 1 # ID=1_381;partial=00;start_type=ATG;rbs_motif=GGA/GAG/AGG;rbs_spacer=5-10bp;gc_cont=0.465	SRVP_Atabeya-2_381	SR-VP_11_27_2022_S1_100cm_MT	7	374721	376628	1908	11625022	0.315592	arCOG00543	-	Predicted_metal-dependent_RNase,_consists_of_a_metallo-beta-lactamase_domain_and_an_RNA-binding_KH_domain	R	COG1782	Predicted_metal-dependent_RNase,_contains_metallo-beta-lactamase_and_KH_domains	R	-
SRVP_Atabeya-2-AMLJHBDE_03890	SRVP_Atabeya-2_389 # 382154 # 382630 # 1 # ID=1_389;partial=00;start_type=ATG;rbs_motif=GGA/GAG/AGG;rbs_spacer=5-10bp;gc_cont=0.449	SRVP_Atabeya-2_389	SR-VP_11_27_2022_S1_100cm_MT	5	382154	382630	477	11625022	0.901691	arCOG04098	RplV	Ribosomal_protein_L22	J	COG0091	Ribosomal_protein_L22	J	Ribosome_50S_subunit
SRVP_Atabeya-2-AMLJHBDE_03900	SRVP_Atabeya-2_390 # 382644 # 383525 # 1 # ID=1_390;partial=00;start_type=TTG;rbs_motif=GGAG/GAGG;rbs_spacer=5-10bp;gc_cont=0.488	SRVP_Atabeya-2_390	SR-VP_11_27_2022_S1_100cm_MT	1	382644	383525	882	11625022	0.0975299	arCOG04097	RpsC	Ribosomal_protein_S3	J	COG0092	Ribosomal_protein_S3	J	Ribosome_30S_subunit
SRVP_Atabeya-2-AMLJHBDE_03960	SRVP_Atabeya-2_396 # 385465 # 386238 # 1 # ID=1_396;partial=00;start_type=TTG;rbs_motif=AGGAGG;rbs_spacer=5-10bp;gc_cont=0.447	SRVP_Atabeya-2_396	SR-VP_11_27_2022_S1_100cm_MT	1	385465	386238	774	11625022	0.111139	arCOG04093	RPS4A	Ribosomal_protein_S4E	J	COG1471	Ribosomal_protein_S4E	J	Archaeal_ribosomal_proteins
SRVP_Atabeya-2-AMLJHBDE_03970	SRVP_Atabeya-2_397 # 386300 # 386446 # -1 # ID=1_397;partial=00;start_type=TTG;rbs_motif=AGGAGG;rbs_spacer=5-10bp;gc_cont=0.449	SRVP_Atabeya-2_397	SR-VP_11_27_2022_S1_100cm_MT	1	386300	386446	147	11625022	0.585179	arCOG00782	RpsN	Ribosomal_protein_S14	J	COG0199	Ribosomal_protein_S14	J	Ribosome_30S_subunit
SRVP_Atabeya-2-AMLJHBDE_04010	SRVP_Atabeya-2_401 # 388396 # 389016 # 1 # ID=1_401;partial=00;start_type=ATG;rbs_motif=GGAG/GAGG;rbs_spacer=5-10bp;gc_cont=0.452	SRVP_Atabeya-2_401	SR-VP_07_25_2022_A4_70cm_MT	1	388396	389016	621	19546	82.3854	arCOG00781	RPL32	Ribosomal_protein_L32E	J	COG1717	Ribosomal_protein_L32E	J	Archaeal_ribosomal_proteins
SRVP_Atabeya-2-AMLJHBDE_04070	SRVP_Atabeya-2_407 # 391773 # 393224 # 1 # ID=1_407;partial=00;start_type=ATG;rbs_motif=AGGA/GGAG/GAGG;rbs_spacer=11-12bp;gc_cont=0.464	SRVP_Atabeya-2_407	SR-VP_11_27_2022_S1_100cm_MT	2	391773	393224	1452	11625022	0.118487	arCOG04169	SecY	Preprotein_translocase_subunit_SecY	U	COG0201	Preprotein_translocase_subunit_SecY	U	-
SRVP_Atabeya-2-AMLJHBDE_04080	SRVP_Atabeya-2_408 # 393306 # 393878 # 1 # ID=1_408;partial=00;start_type=ATG;rbs_motif=AGxAGG/AGGxGG;rbs_spacer=5-10bp;gc_cont=0.445	SRVP_Atabeya-2_408	SR-VP_11_27_2022_S1_100cm_MT	4	393306	393878	573	11625022	0.600498	arCOG02673	-	OxaA/SpoJ/YidC_translocase/secretase,_sec-independent_itegration_of_nascent_memrane_proteins_into_membrane	U	COG1422	Archaeal_YidC/Oxa1-related_membrane_protein,_DUF106_family	M	-
SRVP_Atabeya-2-AMLJHBDE_04090	SRVP_Atabeya-2_409 # 393905 # 394219 # 1 # ID=1_409;partial=00;start_type=TTG;rbs_motif=GGAG/GAGG;rbs_spacer=5-10bp;gc_cont=0.476	SRVP_Atabeya-2_409	SR-VP_11_27_2022_S2_40cm_MT	2	393905	394219	315	4025082	1.57741	arCOG04168	RPL34A	Ribosomal_protein_L34E	J	COG2174	Ribosomal_protein_L34E	J	Archaeal_ribosomal_proteins
SRVP_Atabeya-2-AMLJHBDE_04100	SRVP_Atabeya-2_410 # 394358 # 394909 # 1 # ID=1_410;partial=00;start_type=ATG;rbs_motif=GGxGG;rbs_spacer=11-12bp;gc_cont=0.462	SRVP_Atabeya-2_410	SR-VP_11_27_2022_S1_100cm_MT	4	394358	394909	552	11625022	0.623343	arCOG01037	Cmk	Cytidylate_kinase	F	COG1936	Broad-specificity_NMP_kinase	F	-
SRVP_Atabeya-2-AMLJHBDE_04210	SRVP_Atabeya-2_421 # 401896 # 402354 # 1 # ID=1_421;partial=00;start_type=ATG;rbs_motif=GGAG/GAGG;rbs_spacer=5-10bp;gc_cont=0.473	SRVP_Atabeya-2_421	SR-VP_11_27_2022_S1_100cm_MT	3	401896	402354	459	11625022	0.562231	arCOG04242	RplM	Ribosomal_protein_L13	J	COG0102	Ribosomal_protein_L13	J	Ribosome_50S_subunit
SRVP_Atabeya-2-AMLJHBDE_04240	SRVP_Atabeya-2_424 # 403087 # 403704 # 1 # ID=1_424;partial=00;start_type=ATG;rbs_motif=GGAG/GAGG;rbs_spacer=5-10bp;gc_cont=0.460	SRVP_Atabeya-2_424	SR-VP_11_27_2022_S1_100cm_MT	11	403087	403704	618	11625022	1.53112	arCOG04245	RpsB	Ribosomal_protein_S2	J	COG0052	Ribosomal_protein_S2	J	Ribosome_30S_subunit
SRVP_Atabeya-2-AMLJHBDE_04300	SRVP_Atabeya-2_430 # 408324 # 409550 # -1 # ID=1_430;partial=00;start_type=TTG;rbs_motif=GGA/GAG/AGG;rbs_spacer=5-10bp;gc_cont=0.581	SRVP_Atabeya-2_430	SR-VP_11_27_2022_S1_100cm_MT	4	408324	409550	1227	11625022	0.280428	arCOG00679	-	Transposable_element,_IS605_OrfB_family,_contains_RNAse_H_fold_nuclease_and_Zn_finger_domains	X	COG0675	Transposase	X	-
SRVP_Atabeya-2-AMLJHBDE_04350	SRVP_Atabeya-2_435 # 412886 # 413131 # 1 # ID=1_435;partial=00;start_type=ATG;rbs_motif=AGxAGG/AGGxGG;rbs_spacer=5-10bp;gc_cont=0.435	SRVP_Atabeya-2_435	SR-VP_07_25_2022_A1_70cm_MT	2	412886	413131	246	125142	64.9668	arCOG01950	RPL24A	Ribosomal_protein_L24E	J	COG2075	Ribosomal_protein_L24E	J	Archaeal_ribosomal_proteins
SRVP_Atabeya-2-AMLJHBDE_04360	SRVP_Atabeya-2_436 # 413148 # 413822 # -1 # ID=1_436;partial=00;start_type=TTG;rbs_motif=GGA/GAG/AGG;rbs_spacer=5-10bp;gc_cont=0.431	SRVP_Atabeya-2_436	SR-VP_11_27_2022_S1_100cm_MT	3	413148	413822	675	11625022	0.382317	arCOG04313	Ndk	Nucleoside_diphosphate_kinase	F	COG0105	Nucleoside_diphosphate_kinase	F	Pyrimidine_biosynthesis
SRVP_Atabeya-2-AMLJHBDE_04390	SRVP_Atabeya-2_439 # 416469 # 417551 # 1 # ID=1_439;partial=00;start_type=ATG;rbs_motif=None;rbs_spacer=None;gc_cont=0.499	SRVP_Atabeya-2_439	SR-VP_11_27_2022_S1_80cm_MT	1	416469	417551	1083	4000856	0.230791	arCOG01563	GCD11	Translation_initiation_factor_2,_gamma_subunit_eIF-2_gamma,_GTPase	J	COG5257	Translation_initiation_factor_2,_gamma_subunit_(eIF-2gamma;_GTPase)	J	Translation_factors
SRVP_Atabeya-2-AMLJHBDE_04510	SRVP_Atabeya-2_451 # 425098 # 425664 # 1 # ID=1_451;partial=00;start_type=TTG;rbs_motif=AGGAGG;rbs_spacer=5-10bp;gc_cont=0.467	SRVP_Atabeya-2_451	SR-VP_11_27_2022_S1_100cm_MT	2	425098	425664	567	11625022	0.303426	arCOG04186	RPS1A	Ribosomal_protein_S3AE	J	COG1890	Ribosomal_protein_S3AE	J	Archaeal_ribosomal_proteins
SRVP_Atabeya-2-AMLJHBDE_04520	SRVP_Atabeya-2_452 # 425691 # 426608 # -1 # ID=1_452;partial=00;start_type=ATG;rbs_motif=AGGAGG;rbs_spacer=5-10bp;gc_cont=0.454	SRVP_Atabeya-2_452	SR-VP_11_27_2022_S1_100cm_MT	4	425691	426608	918	11625022	0.374821	-	-	-	-	-	-	-	-
SRVP_Atabeya-2-AMLJHBDE_04530	SRVP_Atabeya-2_453 # 426812 # 428455 # 1 # ID=1_453;partial=00;start_type=ATG;rbs_motif=None;rbs_spacer=None;gc_cont=0.467	SRVP_Atabeya-2_453	SR-VP_11_27_2022_S1_100cm_MT	3	426812	428455	1644	11625022	0.156973	arCOG01355	-	Radical_SAM_superfamily_enzyme	C	COG5011	Uncharacterized_conserved_protein,_DUF2344_family	S	-
SRVP_Atabeya-2-AMLJHBDE_04550	SRVP_Atabeya-2_455 # 428987 # 430204 # 1 # ID=1_455;partial=00;start_type=TTG;rbs_motif=GGAGG;rbs_spacer=5-10bp;gc_cont=0.477	SRVP_Atabeya-2_455	SR-VP_11_27_2022_S1_100cm_MT	2	428987	430204	1218	11625022	0.14125	arCOG00357	GTP1	Ribosome-binding_ATPase_YchF,_GTP1/OBG_family	J	COG0012	Ribosome-binding_ATPase_YchF,_GTP1/OBG_family	J	-
SRVP_Atabeya-2-AMLJHBDE_04600	SRVP_Atabeya-2_460 # 434029 # 434388 # 1 # ID=1_460;partial=00;start_type=GTG;rbs_motif=AGGA/GGAG/GAGG;rbs_spacer=11-12bp;gc_cont=0.431	SRVP_Atabeya-2_460	SR-VP_11_27_2022_S1_100cm_MT	4	434029	434388	360	11625022	0.955793	arCOG01365	POP5	RNase_P/RNase_MRP_subunit_POP5	J	COG1369	RNase_P/RNase_MRP_subunit_POP5	J	-
SRVP_Atabeya-2-AMLJHBDE_04620	SRVP_Atabeya-2_462 # 435563 # 436282 # 1 # ID=1_462;partial=00;start_type=TTG;rbs_motif=AGGAGG;rbs_spacer=5-10bp;gc_cont=0.474	SRVP_Atabeya-2_462	SR-VP_11_27_2022_S1_100cm_MT	1	435563	436282	720	11625022	0.119474	arCOG00971	PRE1	20S_proteasome,_alpha_subunit	O	COG0638	20S_proteasome,_alpha_and_beta_subunits	O	-
SRVP_Atabeya-2-AMLJHBDE_04650	SRVP_Atabeya-2_465 # 437824 # 438615 # 1 # ID=1_465;partial=00;start_type=ATG;rbs_motif=AGGAG(G)/GGAGG;rbs_spacer=13-15bp;gc_cont=0.465	SRVP_Atabeya-2_465	SR-VP_11_27_2022_S1_100cm_MT	4	437824	438615	792	11625022	0.434451	arCOG01575	Rph/Rrp42	Ribonuclease_PH	J	COG0689	Ribonuclease_PH	J	-
SRVP_Atabeya-2-AMLJHBDE_04710	SRVP_Atabeya-2_471 # 441089 # 441358 # 1 # ID=1_471;partial=00;start_type=TTG;rbs_motif=GGxGG;rbs_spacer=5-10bp;gc_cont=0.452	SRVP_Atabeya-2_471	SR-VP_11_27_2022_S1_100cm_MT	1	441089	441358	270	11625022	0.318598	arCOG05854	-	Uncharacterized_protein	S	-	-	-	-
SRVP_Atabeya-2-AMLJHBDE_04750	SRVP_Atabeya-2_475 # 444192 # 444962 # 1 # ID=1_475;partial=00;start_type=GTG;rbs_motif=3Base/5BMM;rbs_spacer=13-15bp;gc_cont=0.431	SRVP_Atabeya-2_475	SR-VP_07_25_2022_A1_70cm_MT	1	444192	444962	771	125142	10.3644	arCOG02250	EcfT	Energy-coupling_factor_transporter_transmembrane_protein_EcfT	H	COG0619	ECF-type_transporter_transmembrane_protein_EcfT	H	-
SRVP_Atabeya-2-AMLJHBDE_04760	SRVP_Atabeya-2_476 # 445110 # 445691 # 1 # ID=1_476;partial=00;start_type=ATG;rbs_motif=AGxAGG/AGGxGG;rbs_spacer=5-10bp;gc_cont=0.448	SRVP_Atabeya-2_476	SR-VP_11_27_2022_S1_100cm_MT	2	445110	445691	582	11625022	0.295606	arCOG00040	Hpt1	Hypoxanthine_phosphoribosyltransferase	H	COG2236	Hypoxanthine_phosphoribosyltransferase	H	Purine_salvage
SRVP_Atabeya-2-AMLJHBDE_04770	SRVP_Atabeya-2_477 # 445728 # 446333 # 1 # ID=1_477;partial=00;start_type=TTG;rbs_motif=GGAG/GAGG;rbs_spacer=5-10bp;gc_cont=0.437	SRVP_Atabeya-2_477	SR-VP_11_27_2022_S1_100cm_MT	5	445728	446333	606	11625022	0.709747	arCOG02197	Cgi121	Subunit_of_KEOPS_complex_(Cgi121BUD32KAE1)	J	COG1617	tRNA_threonylcarbamoyladenosine_modification_(KEOPS)_complex,__Cgi121_subunit	J	tRNA_modification
SRVP_Atabeya-2-AMLJHBDE_04810	SRVP_Atabeya-2_481 # 449048 # 449356 # 1 # ID=1_481;partial=00;start_type=ATG;rbs_motif=GGA/GAG/AGG;rbs_spacer=11-12bp;gc_cont=0.476	SRVP_Atabeya-2_481	SR-VP_11_27_2022_S1_100cm_MT	3	449048	449356	309	11625022	0.835159	arCOG04223	SUI1	Translation_initiation_factor_1_(eIF-1/SUI1)	J	COG0023	Translation_initiation_factor_1_(eIF-1/SUI1)	J	Translation_factors
SRVP_Atabeya-2-AMLJHBDE_04820	SRVP_Atabeya-2_482 # 449642 # 450667 # 1 # ID=1_482;partial=00;start_type=ATG;rbs_motif=GGxGG;rbs_spacer=5-10bp;gc_cont=0.472	SRVP_Atabeya-2_482	SR-VP_11_27_2022_S1_100cm_MT	7	449642	450667	1026	11625022	0.58689	arCOG00493	GapA	Glyceraldehyde-3-phosphate_dehydrogenase/erythrose-4-phosphate_dehydrogenase	G	COG0057	Glyceraldehyde-3-phosphate_dehydrogenase/erythrose-4-phosphate_dehydrogenase	G	Glycolysis
SRVP_Atabeya-2-AMLJHBDE_04830	SRVP_Atabeya-2_483 # 450798 # 451982 # 1 # ID=1_483;partial=00;start_type=ATG;rbs_motif=GGA/GAG/AGG;rbs_spacer=5-10bp;gc_cont=0.465	SRVP_Atabeya-2_483	SR-VP_11_27_2022_S1_100cm_MT	1	450798	451982	1185	11625022	0.0725919	arCOG00103	-	D-arabino_3-hexulose_6-phosphate_formaldehyde_lyase	G	COG0269	3-keto-L-gulonate-6-phosphate_decarboxylase	G	-
SRVP_Atabeya-2-AMLJHBDE_04840	SRVP_Atabeya-2_484 # 452222 # 453730 # 1 # ID=1_484;partial=00;start_type=ATG;rbs_motif=GGxGG;rbs_spacer=5-10bp;gc_cont=0.447	SRVP_Atabeya-2_484	SR-VP_11_27_2022_S1_100cm_MT	2	452222	453730	1509	11625022	0.114011	arCOG02486	-	Transglutaminase-like_cysteine_protease	E	-	-	-	-
SRVP_Atabeya-2-AMLJHBDE_04890	SRVP_Atabeya-2_489 # 457112 # 459379 # 1 # ID=1_489;partial=00;start_type=ATG;rbs_motif=GGA/GAG/AGG;rbs_spacer=5-10bp;gc_cont=0.461	SRVP_Atabeya-2_489	SR-VP_11_27_2022_S1_100cm_MT	2	457112	459379	2268	11625022	0.0758566	arCOG00808	ValS	Valyl-tRNA_synthetase	J	COG0525	Valyl-tRNA_synthetase	J	Aminoacyl-tRNA_synthetases
SRVP_Atabeya-2-AMLJHBDE_04900	SRVP_Atabeya-2_490 # 461125 # 461568 # 1 # ID=1_490;partial=00;start_type=ATG;rbs_motif=GGAG/GAGG;rbs_spacer=5-10bp;gc_cont=0.604	SRVP_Atabeya-2_490	SR-VP_11_27_2022_S1_100cm_MT	26056	461125	461568	444	11625022	5048.14	-	-	-	-	-	-	-	-
SRVP_Atabeya-2-AMLJHBDE_04900	SRVP_Atabeya-2_490 # 461125 # 461568 # 1 # ID=1_490;partial=00;start_type=ATG;rbs_motif=GGAG/GAGG;rbs_spacer=5-10bp;gc_cont=0.604	SRVP_Atabeya-2_490	SR-VP_11_27_2022_S1_80cm_MT	156	461125	461568	444	4000856	87.819	-	-	-	-	-	-	-	-
SRVP_Atabeya-2-AMLJHBDE_04900	SRVP_Atabeya-2_490 # 461125 # 461568 # 1 # ID=1_490;partial=00;start_type=ATG;rbs_motif=GGAG/GAGG;rbs_spacer=5-10bp;gc_cont=0.604	SRVP_Atabeya-2_490	SR-VP_11_27_2022_S2_40cm_MT	144	461125	461568	444	4025082	80.5758	-	-	-	-	-	-	-	-
SRVP_Atabeya-2-AMLJHBDE_04900	SRVP_Atabeya-2_490 # 461125 # 461568 # 1 # ID=1_490;partial=00;start_type=ATG;rbs_motif=GGAG/GAGG;rbs_spacer=5-10bp;gc_cont=0.604	SRVP_Atabeya-2_490	SR-VP_11_27_2022_S1_60cm_MT	119	461125	461568	444	1990488	134.649	-	-	-	-	-	-	-	-
SRVP_Atabeya-2-AMLJHBDE_04900	SRVP_Atabeya-2_490 # 461125 # 461568 # 1 # ID=1_490;partial=00;start_type=ATG;rbs_motif=GGAG/GAGG;rbs_spacer=5-10bp;gc_cont=0.604	SRVP_Atabeya-2_490	SR-VP_11_27_2022_S1_40cm_MT	72	461125	461568	444	1473124	110.08	-	-	-	-	-	-	-	-
SRVP_Atabeya-2-AMLJHBDE_04900	SRVP_Atabeya-2_490 # 461125 # 461568 # 1 # ID=1_490;partial=00;start_type=ATG;rbs_motif=GGAG/GAGG;rbs_spacer=5-10bp;gc_cont=0.604	SRVP_Atabeya-2_490	SR-VP_07_25_2022_A1_70cm_MT	45	461125	461568	444	125142	809.891	-	-	-	-	-	-	-	-
SRVP_Atabeya-2-AMLJHBDE_04900	SRVP_Atabeya-2_490 # 461125 # 461568 # 1 # ID=1_490;partial=00;start_type=ATG;rbs_motif=GGAG/GAGG;rbs_spacer=5-10bp;gc_cont=0.604	SRVP_Atabeya-2_490	SR-VP_07_25_2022_A4_70cm_MT	3	461125	461568	444	19546	345.685	-	-	-	-	-	-	-	-
SRVP_Atabeya-2-AMLJHBDE_04910	SRVP_Atabeya-2_491 # 462297 # 462707 # -1 # ID=1_491;partial=00;start_type=TTG;rbs_motif=AGGA/GGAG/GAGG;rbs_spacer=11-12bp;gc_cont=0.540	SRVP_Atabeya-2_491	SR-VP_11_27_2022_S1_100cm_MT	71	462297	462707	411	11625022	14.8601	-	-	-	-	-	-	-	-
SRVP_Atabeya-2-AMLJHBDE_04910	SRVP_Atabeya-2_491 # 462297 # 462707 # -1 # ID=1_491;partial=00;start_type=TTG;rbs_motif=AGGA/GGAG/GAGG;rbs_spacer=11-12bp;gc_cont=0.540	SRVP_Atabeya-2_491	SR-VP_11_27_2022_S2_40cm_MT	1	462297	462707	411	4025082	0.604482	-	-	-	-	-	-	-	-
SRVP_Atabeya-2-AMLJHBDE_04980	SRVP_Atabeya-2_498 # 472540 # 473025 # 1 # ID=1_498;partial=00;start_type=TTG;rbs_motif=GGA/GAG/AGG;rbs_spacer=5-10bp;gc_cont=0.461	SRVP_Atabeya-2_498	SR-VP_11_27_2022_S1_100cm_MT	2	472540	473025	486	11625022	0.353997	arCOG00776	MaoC	Acyl_dehydratase	I	COG2030	Acyl-CoA_dehydratase_PaaZ	I	-
SRVP_Atabeya-2-AMLJHBDE_04980	SRVP_Atabeya-2_498 # 472540 # 473025 # 1 # ID=1_498;partial=00;start_type=TTG;rbs_motif=GGA/GAG/AGG;rbs_spacer=5-10bp;gc_cont=0.461	SRVP_Atabeya-2_498	SR-VP_11_27_2022_S1_60cm_MT	1	472540	473025	486	1990488	1.03372	arCOG00776	MaoC	Acyl_dehydratase	I	COG2030	Acyl-CoA_dehydratase_PaaZ	I	-
SRVP_Atabeya-2-AMLJHBDE_05140	SRVP_Atabeya-2_514 # 486634 # 487140 # 1 # ID=1_514;partial=00;start_type=ATG;rbs_motif=3Base/5BMM;rbs_spacer=13-15bp;gc_cont=0.434	SRVP_Atabeya-2_514	SR-VP_11_27_2022_S1_100cm_MT	3	486634	487140	507	11625022	0.509002	arCOG01761	NusA	Transcription_elongation_factor	K	-	-	-	-
SRVP_Atabeya-2-AMLJHBDE_05290	SRVP_Atabeya-2_529 # 495636 # 496052 # -1 # ID=1_529;partial=00;start_type=ATG;rbs_motif=GGA/GAG/AGG;rbs_spacer=5-10bp;gc_cont=0.376	SRVP_Atabeya-2_529	SR-VP_11_27_2022_S1_100cm_MT	1	495636	496052	417	11625022	0.206286	-	-	-	-	-	-	-	-
SRVP_Atabeya-2-AMLJHBDE_05340	SRVP_Atabeya-2_534 # 500706 # 501329 # 1 # ID=1_534;partial=00;start_type=ATG;rbs_motif=None;rbs_spacer=None;gc_cont=0.426	SRVP_Atabeya-2_534	SR-VP_07_25_2022_A1_70cm_MT	1	500706	501329	624	125142	12.806	arCOG02258	-	RPA_family_protein,_a_subunit_of_RPA_complex_in_P.furiosus	L	COG3390	Replication_protein_A_(RPA)_family_protein	L	-
SRVP_Atabeya-2-AMLJHBDE_05390	SRVP_Atabeya-2_539 # 503482 # 504303 # 1 # ID=1_539;partial=00;start_type=TTG;rbs_motif=GGA/GAG/AGG;rbs_spacer=5-10bp;gc_cont=0.449	SRVP_Atabeya-2_539	SR-VP_11_27_2022_S1_100cm_MT	6	503482	504303	822	11625022	0.627893	arCOG01180	RIO1	Serine/threonine_protein_kinase_involved_in_cell_cycle_control	T	COG1718	Serine/threonine-protein_kinase_RIO1	T	-
SRVP_Atabeya-2-AMLJHBDE_05400	SRVP_Atabeya-2_540 # 504300 # 504890 # 1 # ID=1_540;partial=00;start_type=ATG;rbs_motif=GGA/GAG/AGG;rbs_spacer=5-10bp;gc_cont=0.448	SRVP_Atabeya-2_540	SR-VP_11_27_2022_S1_100cm_MT	1	504300	504890	591	11625022	0.145552	arCOG04150	Krr1	rRNA_processing_protein_Krr1/Pno1,_contains_KH_domain	J	COG1094	rRNA_processing_protein_Krr1/Pno1,_contains_KH_domain	J	-
SRVP_Atabeya-2-AMLJHBDE_05420	SRVP_Atabeya-2_542 # 506536 # 507684 # -1 # ID=1_542;partial=00;start_type=ATG;rbs_motif=GGA/GAG/AGG;rbs_spacer=11-12bp;gc_cont=0.471	SRVP_Atabeya-2_542	SR-VP_11_27_2022_S1_100cm_MT	25	506536	507684	1149	11625022	1.87166	arCOG03061	MreB	Actin-like_ATPase_involved_in_cell_morphogenesis	D	COG5277	Actin-related_protein	Z	-
SRVP_Atabeya-2-AMLJHBDE_05480	SRVP_Atabeya-2_548 # 511789 # 513330 # 1 # ID=1_548;partial=00;start_type=TTG;rbs_motif=GGA/GAG/AGG;rbs_spacer=11-12bp;gc_cont=0.450	SRVP_Atabeya-2_548	SR-VP_11_27_2022_S1_100cm_MT	4	511789	513330	1542	11625022	0.223142	-	-	-	-	COG4965	Flp_pilus_assembly_protein_TadB	UW	-
SRVP_Atabeya-2-AMLJHBDE_05490	SRVP_Atabeya-2_549 # 513370 # 514350 # -1 # ID=1_549;partial=00;start_type=TTG;rbs_motif=GGA/GAG/AGG;rbs_spacer=5-10bp;gc_cont=0.468	SRVP_Atabeya-2_549	SR-VP_11_27_2022_S1_100cm_MT	4	513370	514350	981	11625022	0.35075	arCOG02849	ArsA	Oxyanion-translocating_ATPase	P	COG0003	Anion-transporting_ATPase,_ArsA/GET3_family	P	-
SRVP_Atabeya-2-AMLJHBDE_05500	SRVP_Atabeya-2_550 # 514556 # 515443 # -1 # ID=1_550;partial=00;start_type=GTG;rbs_motif=GGAG/GAGG;rbs_spacer=5-10bp;gc_cont=0.436	SRVP_Atabeya-2_550	SR-VP_11_27_2022_S1_100cm_MT	1	514556	515443	888	11625022	0.0968709	-	-	-	-	-	-	-	-
SRVP_Atabeya-2-AMLJHBDE_05520	SRVP_Atabeya-2_552 # 516300 # 516989 # -1 # ID=1_552;partial=00;start_type=TTG;rbs_motif=GGA/GAG/AGG;rbs_spacer=5-10bp;gc_cont=0.455	SRVP_Atabeya-2_552	SR-VP_11_27_2022_S1_100cm_MT	6	516300	516989	690	11625022	0.748012	arCOG02766	-	Metal-dependent_membrane_protease,_CAAX_family	E	COG1266	Membrane_protease_YdiL,_CAAX_protease_family	O	-
SRVP_Atabeya-2-AMLJHBDE_05530	SRVP_Atabeya-2_553 # 517084 # 518712 # -1 # ID=1_553;partial=00;start_type=ATG;rbs_motif=GGA/GAG/AGG;rbs_spacer=3-4bp;gc_cont=0.460	SRVP_Atabeya-2_553	SR-VP_11_27_2022_S1_100cm_MT	1	517084	518712	1629	11625022	0.0528062	arCOG00693	AdeC	Adenine_deaminase	F	COG1001	Adenine_deaminase	F	-
SRVP_Atabeya-2-AMLJHBDE_05540	SRVP_Atabeya-2_554 # 518865 # 519926 # 1 # ID=1_554;partial=00;start_type=TTG;rbs_motif=GGA/GAG/AGG;rbs_spacer=5-10bp;gc_cont=0.476	SRVP_Atabeya-2_554	SR-VP_11_27_2022_S1_100cm_MT	1	518865	519926	1062	11625022	0.0809994	arCOG00476	UbiA	4-hydroxybenzoate_polyprenyltransferase_or_related_prenyltransferase	H	COG0382	4-hydroxybenzoate_polyprenyltransferase	H	Ubiquinone_biosynthesis
SRVP_Atabeya-2-AMLJHBDE_05550	SRVP_Atabeya-2_555 # 519928 # 520905 # -1 # ID=1_555;partial=00;start_type=TTG;rbs_motif=GGA/GAG/AGG;rbs_spacer=5-10bp;gc_cont=0.462	SRVP_Atabeya-2_555	SR-VP_11_27_2022_S1_100cm_MT	11	519928	520905	978	11625022	0.96752	-	-	-	-	-	-	-	-
SRVP_Atabeya-2-AMLJHBDE_05560	SRVP_Atabeya-2_556 # 520961 # 521617 # -1 # ID=1_556;partial=00;start_type=TTG;rbs_motif=GGxGG;rbs_spacer=5-10bp;gc_cont=0.467	SRVP_Atabeya-2_556	SR-VP_11_27_2022_S1_100cm_MT	3	520961	521617	657	11625022	0.392792	-	-	-	-	-	-	-	-
SRVP_Atabeya-2-AMLJHBDE_05600	SRVP_Atabeya-2_560 # 523920 # 524840 # -1 # ID=1_560;partial=00;start_type=ATG;rbs_motif=GGAGG;rbs_spacer=5-10bp;gc_cont=0.466	SRVP_Atabeya-2_560	SR-VP_11_27_2022_S1_100cm_MT	4	523920	524840	921	11625022	0.3736	arCOG01728	Mho1	Predicted_class_III_extradiol_dioxygenase,_MEMO1_family	R	COG1355	Predicted_class_III_extradiol_dioxygenase,_MEMO1_family	R	-
SRVP_Atabeya-2-AMLJHBDE_05610	SRVP_Atabeya-2_561 # 524956 # 525501 # -1 # ID=1_561;partial=00;start_type=ATG;rbs_motif=None;rbs_spacer=None;gc_cont=0.443	SRVP_Atabeya-2_561	SR-VP_11_27_2022_S1_100cm_MT	3	524956	525501	546	11625022	0.472645	arCOG00721	Nob1	Endonuclease_Nob1,_consists_of_a_PIN_domain_and_a_Zn-ribbon_module	J	COG1439	rRNA_maturation_endonuclease_Nob1	J	-
SRVP_Atabeya-2-AMLJHBDE_05620	SRVP_Atabeya-2_562 # 525593 # 526414 # -1 # ID=1_562;partial=00;start_type=TTG;rbs_motif=GGA/GAG/AGG;rbs_spacer=11-12bp;gc_cont=0.453	SRVP_Atabeya-2_562	SR-VP_11_27_2022_S1_100cm_MT	2	525593	526414	822	11625022	0.209298	arCOG01348	nadF	NAD_kinase	H	COG0061	NAD_kinase	H	-
SRVP_Atabeya-2-AMLJHBDE_05680	SRVP_Atabeya-2_568 # 531199 # 531489 # 1 # ID=1_568;partial=00;start_type=ATG;rbs_motif=GGA/GAG/AGG;rbs_spacer=5-10bp;gc_cont=0.478	SRVP_Atabeya-2_568	SR-VP_11_27_2022_S1_100cm_MT	1	531199	531489	291	11625022	0.295606	arCOG04129	RPL21A	Ribosomal_protein_L21E	J	COG2139	Ribosomal_protein_L21E	J	Archaeal_ribosomal_proteins
SRVP_Atabeya-2-AMLJHBDE_05690	SRVP_Atabeya-2_569 # 531501 # 531842 # 1 # ID=1_569;partial=00;start_type=TTG;rbs_motif=AGGAG;rbs_spacer=5-10bp;gc_cont=0.442	SRVP_Atabeya-2_569	SR-VP_11_27_2022_S1_100cm_MT	1	531501	531842	342	11625022	0.251524	arCOG01016	Rpo4	DNA-directed_RNA_polymerase,_subunit_Rpo4/RpoF	K	COG1460	DNA-directed_RNA_polymerase,_subunit_F	K	RNA_polymerase
SRVP_Atabeya-2-AMLJHBDE_05730	SRVP_Atabeya-2_573 # 533972 # 534619 # -1 # ID=1_573;partial=00;start_type=GTG;rbs_motif=None;rbs_spacer=None;gc_cont=0.465	SRVP_Atabeya-2_573	SR-VP_11_27_2022_S1_100cm_MT	8	533972	534619	648	11625022	1.06199	arCOG00551	-	DNA_replication_initiation_complex_subunit,_GINS15_family	L	COG1711	DNA_replication_initiation_complex_subunit,_GINS_family	L	-
SRVP_Atabeya-2-AMLJHBDE_05940	SRVP_Atabeya-2_594 # 546742 # 547956 # -1 # ID=1_594;partial=00;start_type=TTG;rbs_motif=GGAGG;rbs_spacer=5-10bp;gc_cont=0.459	SRVP_Atabeya-2_594	SR-VP_11_27_2022_S1_100cm_MT	18	546742	547956	1215	11625022	1.27439	arCOG01306	RPT1	ATP-dependent_26S_proteasome_regulatory_subunit	O	COG1222	ATP-dependent_26S_proteasome_regulatory_subunit	O	-
SRVP_Atabeya-2-AMLJHBDE_05990	SRVP_Atabeya-2_599 # 551073 # 552377 # -1 # ID=1_599;partial=00;start_type=ATG;rbs_motif=GGA/GAG/AGG;rbs_spacer=5-10bp;gc_cont=0.475	SRVP_Atabeya-2_599	SR-VP_11_27_2022_S1_100cm_MT	12	551073	552377	1305	11625022	0.791001	arCOG01561	TEF1	Translation_elongation_factor_EF-1_alpha,__GTPase	J	COG5256	Translation_elongation_factor_EF-1alpha_(GTPase)	J	Translation_factors
SRVP_Atabeya-2-AMLJHBDE_06000	SRVP_Atabeya-2_600 # 552610 # 553176 # -1 # ID=1_600;partial=00;start_type=TTG;rbs_motif=GGxGG;rbs_spacer=5-10bp;gc_cont=0.471	SRVP_Atabeya-2_600	SR-VP_11_27_2022_S1_100cm_MT	8	552610	553176	567	11625022	1.21371	arCOG04254	RpsG	Ribosomal_protein_S7	J	COG0049	Ribosomal_protein_S7	J	Ribosome_30S_subunit
SRVP_Atabeya-2-AMLJHBDE_06010	SRVP_Atabeya-2_601 # 553266 # 553703 # -1 # ID=1_601;partial=00;start_type=ATG;rbs_motif=GGAGG;rbs_spacer=5-10bp;gc_cont=0.470	SRVP_Atabeya-2_601	SR-VP_11_27_2022_S1_100cm_MT	3	553266	553703	438	11625022	0.589187	arCOG01760	NusA	Transcription_elongation_factor	K	COG0195	Transcription_antitermination_factor_NusA,_contains_S1_and_KH_domains	K	-
SRVP_Atabeya-2-AMLJHBDE_06040	SRVP_Atabeya-2_604 # 555330 # 557984 # -1 # ID=1_604;partial=00;start_type=TTG;rbs_motif=AGGA/GGAG/GAGG;rbs_spacer=11-12bp;gc_cont=0.481	SRVP_Atabeya-2_604	SR-VP_11_27_2022_S1_100cm_MT	1	555330	557984	2655	11625022	0.0323998	arCOG04257	RpoC/Rpo3	DNA-directed_RNA_polymerase_subunit_A	K	COG0086	DNA-directed_RNA_polymerase,_beta'_subunit/160_kD_subunit	K	RNA_polymerase
SRVP_Atabeya-2-AMLJHBDE_06050	SRVP_Atabeya-2_605 # 558007 # 561345 # -1 # ID=1_605;partial=00;start_type=TTG;rbs_motif=GGA/GAG/AGG;rbs_spacer=5-10bp;gc_cont=0.477	SRVP_Atabeya-2_605	SR-VP_11_27_2022_S1_100cm_MT	18	558007	561345	3339	11625022	0.463727	arCOG01762	RpoB/Rpo2	DNA-directed_RNA_polymerase_subunit_B	K	COG0085	DNA-directed_RNA_polymerase,_beta_subunit/140_kD_subunit	K	RNA_polymerase
SRVP_Atabeya-2-AMLJHBDE_06130	SRVP_Atabeya-2_613 # 569367 # 571067 # -1 # ID=1_613;partial=00;start_type=ATG;rbs_motif=GGAGG;rbs_spacer=5-10bp;gc_cont=0.478	SRVP_Atabeya-2_613	SR-VP_11_27_2022_S1_100cm_MT	2	569367	571067	1701	11625022	0.101142	arCOG04116	-	ATPase_(PilT_family)	R	COG1855	Predicted_ATPase,_PilT_family,_contains_N-terminal_PIN_domain	UW	-
SRVP_Atabeya-2-AMLJHBDE_06150	SRVP_Atabeya-2_615 # 572760 # 573179 # 1 # ID=1_615;partial=00;start_type=ATG;rbs_motif=AGGAG;rbs_spacer=5-10bp;gc_cont=0.421	SRVP_Atabeya-2_615	SR-VP_11_27_2022_S1_80cm_MT	1	572760	573179	420	4000856	0.595111	arCOG01303	GcvH	Glycine_cleavage_system_H_protein_(lipoate-binding)	E	COG0509	Glycine_cleavage_system_protein_H_(lipoate-binding)	E	Glycine_cleavage
SRVP_Atabeya-2-AMLJHBDE_06160	SRVP_Atabeya-2_616 # 573253 # 573462 # -1 # ID=1_616;partial=00;start_type=TTG;rbs_motif=GGxGG;rbs_spacer=5-10bp;gc_cont=0.433	SRVP_Atabeya-2_616	SR-VP_11_27_2022_S1_100cm_MT	2	573253	573462	210	11625022	0.819251	arCOG00906	Nop10	rRNA_maturation_protein_Nop10,_contains_Zn-ribbon_domain	J	COG2260	rRNA_maturation_protein_Nop10,_contains_Zn-ribbon_domain	J	16S_rRNA_modification
SRVP_Atabeya-2-AMLJHBDE_06170	SRVP_Atabeya-2_617 # 573483 # 574274 # -1 # ID=1_617;partial=00;start_type=ATG;rbs_motif=None;rbs_spacer=None;gc_cont=0.443	SRVP_Atabeya-2_617	SR-VP_11_27_2022_S1_100cm_MT	3	573483	574274	792	11625022	0.325838	arCOG04107	SUI2	Translation_initiation_factor_2,_alpha_subunit_(eIF-2alpha)	J	COG1093	Translation_initiation_factor_2,_alpha_subunit_(eIF-2alpha)	J	Translation_factors
SRVP_Atabeya-2-AMLJHBDE_06190	SRVP_Atabeya-2_619 # 575146 # 575424 # -1 # ID=1_619;partial=00;start_type=ATG;rbs_motif=GGAGG;rbs_spacer=5-10bp;gc_cont=0.448	SRVP_Atabeya-2_619	SR-VP_11_27_2022_S1_100cm_MT	3	575146	575424	279	11625022	0.924961	arCOG04109	RPL42A	Ribosomal_protein_L44E	J	COG1631	Ribosomal_protein_L44E	J	Archaeal_ribosomal_proteins
SRVP_Atabeya-2-AMLJHBDE_06200	SRVP_Atabeya-2_620 # 575487 # 575681 # -1 # ID=1_620;partial=00;start_type=TTG;rbs_motif=AGGAG/GGAGG;rbs_spacer=11-12bp;gc_cont=0.487	SRVP_Atabeya-2_620	SR-VP_11_27_2022_S1_100cm_MT	2	575487	575681	195	11625022	0.88227	arCOG04108	RPS27A	Ribosomal_protein_S27E	J	COG2051	Ribosomal_protein_S27E	J	Archaeal_ribosomal_proteins
SRVP_Atabeya-2-AMLJHBDE_06290	SRVP_Atabeya-2_629 # 582170 # 582622 # 1 # ID=1_629;partial=00;start_type=TTG;rbs_motif=AGGA/GGAG/GAGG;rbs_spacer=11-12bp;gc_cont=0.503	SRVP_Atabeya-2_629	SR-VP_11_27_2022_S1_100cm_MT	1	582170	582622	453	11625022	0.189893	arCOG04741	-	Zn_finger_protein	S	COG2888	Predicted_RNA-binding_protein_involved_in_translation,_contains__Zn-ribbon_domain,_DUF1610_family	R	-
SRVP_Atabeya-2-AMLJHBDE_06320	SRVP_Atabeya-2_632 # 584749 # 585504 # 1 # ID=1_632;partial=00;start_type=ATG;rbs_motif=GGA/GAG/AGG;rbs_spacer=5-10bp;gc_cont=0.472	SRVP_Atabeya-2_632	SR-VP_11_27_2022_S1_100cm_MT	15	584749	585504	756	11625022	1.70677	arCOG01744	-	Membrane-bound_metal-dependent_hydrolase_YbcI,_DUF457_family	R	COG1988	Membrane-bound_metal-dependent_hydrolase_YbcI,_DUF457_family	R	-
SRVP_Atabeya-2-AMLJHBDE_06380	SRVP_Atabeya-2_638 # 588030 # 589397 # 1 # ID=1_638;partial=00;start_type=TTG;rbs_motif=AGGAG/GGAGG;rbs_spacer=11-12bp;gc_cont=0.481	SRVP_Atabeya-2_638	SR-VP_11_27_2022_S1_100cm_MT	9	588030	589397	1368	11625022	0.56593	arCOG01110	ArgE	Acetylornithine_deacetylase/Succinyl-diaminopimelate_desuccinylase_or_related_deacylase	E	COG0624	Acetylornithine_deacetylase/Succinyl-diaminopimelate_desuccinylase_or_related_deacylase	E	Arginine_biosynthesis
SRVP_Atabeya-2-AMLJHBDE_06460	SRVP_Atabeya-2_646 # 596428 # 597003 # -1 # ID=1_646;partial=00;start_type=ATG;rbs_motif=AGGAG/GGAGG;rbs_spacer=11-12bp;gc_cont=0.479	SRVP_Atabeya-2_646	SR-VP_07_25_2022_A4_70cm_MT	1	596428	597003	576	19546	88.8218	arCOG11509	-	Uncharacterized_protein	S	-	-	-	-
SRVP_Atabeya-2-AMLJHBDE_06520	SRVP_Atabeya-2_652 # 605033 # 606481 # -1 # ID=1_652;partial=00;start_type=TTG;rbs_motif=AGGAG;rbs_spacer=3-4bp;gc_cont=0.432	SRVP_Atabeya-2_652	SR-VP_11_27_2022_S1_100cm_MT	1	605033	606481	1449	11625022	0.059366	arCOG00883	HepA	Superfamily_II_DNA/RNA_helicase,_SNF2_family	K	COG0553	Superfamily_II_DNA_or_RNA_helicase,_SNF2_family	KL	-
SRVP_Atabeya-2-AMLJHBDE_06560	SRVP_Atabeya-2_656 # 609236 # 610570 # 1 # ID=1_656;partial=00;start_type=ATG;rbs_motif=GGA/GAG/AGG;rbs_spacer=5-10bp;gc_cont=0.436	SRVP_Atabeya-2_656	SR-VP_11_27_2022_S1_100cm_MT	2	609236	610570	1335	11625022	0.128871	arCOG04430	-	HD_superfamily_phosphohydrolase	R	COG1078	HD_superfamily_phosphohydrolase	R	-
SRVP_Atabeya-2-AMLJHBDE_06660	SRVP_Atabeya-2_666 # 622682 # 623608 # 1 # ID=1_666;partial=00;start_type=TTG;rbs_motif=GGA/GAG/AGG;rbs_spacer=5-10bp;gc_cont=0.475	SRVP_Atabeya-2_666	SR-VP_11_27_2022_S1_100cm_MT	5	622682	623608	927	11625022	0.463977	arCOG00415	RadA	RecA/RadA_recombinase,_contains_N-terminal_HHH_domain	L	COG0468	RecA/RadA_recombinase	L	-
SRVP_Atabeya-2-AMLJHBDE_06700	SRVP_Atabeya-2_670 # 625924 # 626994 # -1 # ID=1_670;partial=00;start_type=ATG;rbs_motif=GGxGG;rbs_spacer=3-4bp;gc_cont=0.463	SRVP_Atabeya-2_670	SR-VP_11_27_2022_S1_40cm_MT	1	625924	626994	1071	1473124	0.633828	arCOG00756	GcvT	Glycine_cleavage_system_T_protein_(aminomethyltransferase)	E	COG0404	Glycine_cleavage_system_protein_T_(aminomethyltransferase)	E	Glycine_cleavage
SRVP_Atabeya-2-AMLJHBDE_06740	SRVP_Atabeya-2_674 # 630648 # 631079 # 1 # ID=1_674;partial=00;start_type=ATG;rbs_motif=GGxGG;rbs_spacer=5-10bp;gc_cont=0.481	SRVP_Atabeya-2_674	SR-VP_11_27_2022_S1_100cm_MT	4	630648	631079	432	11625022	0.796494	-	-	-	-	-	-	-	-
SRVP_Atabeya-2-AMLJHBDE_06750	SRVP_Atabeya-2_675 # 631099 # 631653 # -1 # ID=1_675;partial=00;start_type=ATG;rbs_motif=AGGAG/GGAGG;rbs_spacer=11-12bp;gc_cont=0.447	SRVP_Atabeya-2_675	SR-VP_11_27_2022_S1_100cm_MT	11	631099	631653	555	11625022	1.70493	arCOG04106	CdsA	CDP-diglyceride_synthetase	I	COG0575	CDP-diglyceride_synthetase	I	Phospholipid_biosynthesis
SRVP_Atabeya-2-AMLJHBDE_06840	SRVP_Atabeya-2_684 # 638834 # 640318 # 1 # ID=1_684;partial=00;start_type=TTG;rbs_motif=GGA/GAG/AGG;rbs_spacer=5-10bp;gc_cont=0.450	SRVP_Atabeya-2_684	SR-VP_11_27_2022_S1_100cm_MT	2	638834	640318	1485	11625022	0.115854	arCOG04455	HYS2	Archaeal_DNA_polymerase_II,_small_subunit/DNA_polymerase_delta,_subunit_B	L	COG1311	Archaeal_DNA_polymerase_II,_small_subunit/DNA_polymerase_delta,_subunit_B	L	-
SRVP_Atabeya-2-AMLJHBDE_06850	SRVP_Atabeya-2_685 # 640333 # 641586 # -1 # ID=1_685;partial=00;start_type=ATG;rbs_motif=GGAG/GAGG;rbs_spacer=5-10bp;gc_cont=0.478	SRVP_Atabeya-2_685	SR-VP_11_27_2022_S1_100cm_MT	3	640333	641586	1254	11625022	0.205793	arCOG00467	CDC6	Cdc6-related_protein,_AAA_superfamily_ATPase	L	COG1474	Cdc6-related_protein,_AAA_superfamily_ATPase	L	-
SRVP_Atabeya-2-AMLJHBDE_06890	SRVP_Atabeya-2_689 # 644429 # 645250 # 1 # ID=1_689;partial=00;start_type=GTG;rbs_motif=AGGA/GGAG/GAGG;rbs_spacer=11-12bp;gc_cont=0.465	SRVP_Atabeya-2_689	SR-VP_11_27_2022_S1_60cm_MT	1	644429	645250	822	1990488	0.611179	arCOG01875	-	ParB-like_nuclease_domain	K	COG1475	Chromosome_segregation_protein_Spo0J,_contains_ParB-like_nuclease_domain	D	-
SRVP_Atabeya-2-AMLJHBDE_06930	SRVP_Atabeya-2_693 # 647454 # 648653 # -1 # ID=1_693;partial=00;start_type=ATG;rbs_motif=GGA/GAG/AGG;rbs_spacer=5-10bp;gc_cont=0.478	SRVP_Atabeya-2_693	SR-VP_11_27_2022_S1_100cm_MT	5	647454	648653	1200	11625022	0.358422	arCOG01608	PorA	Pyruvate:ferredoxin_oxidoreductase_or_related_2-oxoacid:ferredoxin_oxidoreductase,_alpha_subunit	C	COG0674	Pyruvate:ferredoxin_oxidoreductase_or_related_2-oxoacid:ferredoxin_oxidoreductase,_alpha_subunit	C	Pyruvate_oxidation
SRVP_Atabeya-2-AMLJHBDE_07000	SRVP_Atabeya-2_700 # 652911 # 653900 # 1 # ID=1_700;partial=00;start_type=ATG;rbs_motif=GGA/GAG/AGG;rbs_spacer=5-10bp;gc_cont=0.479	SRVP_Atabeya-2_700	SR-VP_11_27_2022_S1_100cm_MT	4	652911	653900	990	11625022	0.347561	arCOG00070	GlyA	Glycine/serine_hydroxymethyltransferase	E	COG0112	Glycine/serine_hydroxymethyltransferase	E	Serine_biosynthesis
SRVP_Atabeya-2-AMLJHBDE_07010	SRVP_Atabeya-2_701 # 654043 # 654882 # 1 # ID=1_701;partial=00;start_type=ATG;rbs_motif=GGAGG;rbs_spacer=5-10bp;gc_cont=0.473	SRVP_Atabeya-2_701	SR-VP_11_27_2022_S1_100cm_MT	1	654043	654882	840	11625022	0.102406	arCOG00600	-	CBS_domain	R	COG2524	Predicted_transcriptional_regulator,_contains_C-terminal_CBS_domains	K	-
SRVP_Atabeya-2-AMLJHBDE_07020	SRVP_Atabeya-2_702 # 654903 # 658352 # -1 # ID=1_702;partial=00;start_type=GTG;rbs_motif=GGA/GAG/AGG;rbs_spacer=5-10bp;gc_cont=0.470	SRVP_Atabeya-2_702	SR-VP_11_27_2022_S1_100cm_MT	9	654903	658352	3450	11625022	0.224404	arCOG04447	-	Archaeal_DNA_polymerase_II,_large_subunit	L	COG1933	Archaeal_DNA_polymerase_II,_large_subunit	L	-
SRVP_Atabeya-2-AMLJHBDE_07030	SRVP_Atabeya-2_703 # 658575 # 660833 # -1 # ID=1_703;partial=00;start_type=TTG;rbs_motif=GGA/GAG/AGG;rbs_spacer=5-10bp;gc_cont=0.448	SRVP_Atabeya-2_703	SR-VP_11_27_2022_S1_100cm_MT	1	658575	660833	2259	11625022	0.0380794	arCOG01817	FlaI	ATPase_involved_in_archaellum/pili_biosynthesis	N	COG0630	Type_IV_secretory_pathway_ATPase_VirB11/Archaellum_biosynthesis_ATPase_ArlI/FlaI	NU	-
SRVP_Atabeya-2-AMLJHBDE_07060	SRVP_Atabeya-2_706 # 662814 # 663440 # -1 # ID=1_706;partial=00;start_type=GTG;rbs_motif=GGA/GAG/AGG;rbs_spacer=5-10bp;gc_cont=0.517	SRVP_Atabeya-2_706	SR-VP_11_27_2022_S1_100cm_MT	1	662814	663440	627	11625022	0.137195	arCOG04067	RplB	Ribosomal_protein_L2	J	COG0090	Ribosomal_protein_L2	J	Ribosome_50S_subunit
SRVP_Atabeya-2-AMLJHBDE_07070	SRVP_Atabeya-2_707 # 663607 # 663867 # -1 # ID=1_707;partial=00;start_type=ATG;rbs_motif=GGxGG;rbs_spacer=5-10bp;gc_cont=0.448	SRVP_Atabeya-2_707	SR-VP_11_27_2022_S1_100cm_MT	2	663607	663867	261	11625022	0.659167	arCOG04072	RplW	Ribosomal_protein_L23	J	COG0089	Ribosomal_protein_L23	J	Ribosome_50S_subunit
SRVP_Atabeya-2-AMLJHBDE_07080	SRVP_Atabeya-2_708 # 663864 # 664670 # -1 # ID=1_708;partial=00;start_type=ATG;rbs_motif=AGGAGG;rbs_spacer=5-10bp;gc_cont=0.485	SRVP_Atabeya-2_708	SR-VP_11_27_2022_S1_100cm_MT	1	663864	664670	807	11625022	0.106594	arCOG04071	RplD	Ribosomal_protein_L4	J	COG0088	Ribosomal_protein_L4	J	Ribosome_50S_subunit
SRVP_Atabeya-2-AMLJHBDE_07090	SRVP_Atabeya-2_709 # 664693 # 665697 # -1 # ID=1_709;partial=00;start_type=ATG;rbs_motif=AGGAGG;rbs_spacer=5-10bp;gc_cont=0.491	SRVP_Atabeya-2_709	SR-VP_11_27_2022_S1_100cm_MT	2	664693	665697	1005	11625022	0.171187	arCOG04070	RplC	Ribosomal_protein_L3	J	COG0087	Ribosomal_protein_L3	J	Ribosome_50S_subunit
SRVP_Atabeya-2-AMLJHBDE_07150	SRVP_Atabeya-2_715 # 668630 # 668866 # -1 # ID=1_715;partial=00;start_type=ATG;rbs_motif=None;rbs_spacer=None;gc_cont=0.460	SRVP_Atabeya-2_715	SR-VP_11_27_2022_S1_100cm_MT	1	668630	668866	237	11625022	0.362959	-	-	-	-	COG3847	Flp_pilus_assembly_protein,_pilin_Flp	UW	-
SRVP_Atabeya-2-AMLJHBDE_07160	SRVP_Atabeya-2_716 # 669451 # 669777 # 1 # ID=1_716;partial=00;start_type=ATG;rbs_motif=GGAGG;rbs_spacer=5-10bp;gc_cont=0.401	SRVP_Atabeya-2_716	SR-VP_11_27_2022_S1_100cm_MT	1	669451	669777	327	11625022	0.263062	arCOG04056	ArsR	Transcriptional_regulator_containing_HTH_domain,_ArsR_family	K	COG0640	DNA-binding_transcriptional_regulator,_ArsR_family	K	-
SRVP_Atabeya-2-AMLJHBDE_07180	SRVP_Atabeya-2_718 # 670058 # 671266 # 1 # ID=1_718;partial=00;start_type=TTG;rbs_motif=GGA/GAG/AGG;rbs_spacer=5-10bp;gc_cont=0.460	SRVP_Atabeya-2_718	SR-VP_11_27_2022_S1_100cm_MT	5	670058	671266	1209	11625022	0.355754	arCOG00467	CDC6	Cdc6-related_protein,_AAA_superfamily_ATPase	L	COG1474	Cdc6-related_protein,_AAA_superfamily_ATPase	L	-
SRVP_Atabeya-2-AMLJHBDE_07180	SRVP_Atabeya-2_718 # 670058 # 671266 # 1 # ID=1_718;partial=00;start_type=TTG;rbs_motif=GGA/GAG/AGG;rbs_spacer=5-10bp;gc_cont=0.460	SRVP_Atabeya-2_718	SR-VP_11_27_2022_S1_60cm_MT	1	670058	671266	1209	1990488	0.415541	arCOG00467	CDC6	Cdc6-related_protein,_AAA_superfamily_ATPase	L	COG1474	Cdc6-related_protein,_AAA_superfamily_ATPase	L	-
SRVP_Atabeya-2-AMLJHBDE_07200	SRVP_Atabeya-2_720 # 672854 # 673786 # 1 # ID=1_720;partial=00;start_type=TTG;rbs_motif=GGxGG;rbs_spacer=5-10bp;gc_cont=0.443	SRVP_Atabeya-2_720	SR-VP_11_27_2022_S1_100cm_MT	3	672854	673786	933	11625022	0.276596	arCOG00042	TilS	tRNA(Ile)-lysidine_synthase_TilS/MesJ	J	COG0037	tRNA(Ile)-lysidine_synthase_TilS/MesJ	J	tRNA_modification
SRVP_Atabeya-2-AMLJHBDE_07210	SRVP_Atabeya-2_721 # 674558 # 674980 # 1 # ID=1_721;partial=00;start_type=GTG;rbs_motif=GGxGG;rbs_spacer=5-10bp;gc_cont=0.461	SRVP_Atabeya-2_721	SR-VP_11_27_2022_S1_100cm_MT	1	674558	674980	423	11625022	0.20336	arCOG04055	-	Archease,_SHS2_domain_containing_protein_involved_in_activation_of_tRNA_ligase_RtcB	J	COG1371	Archease,_activates_RNA_ligation_by_RtcB_(tRNA_splicing)	J	-
SRVP_Atabeya-2-AMLJHBDE_07230	SRVP_Atabeya-2_723 # 676102 # 676353 # -1 # ID=1_723;partial=00;start_type=ATG;rbs_motif=None;rbs_spacer=None;gc_cont=0.433	SRVP_Atabeya-2_723	SR-VP_11_27_2022_S1_100cm_MT	6	676102	676353	252	11625022	2.04813	arCOG04136	Elf1	Transcription_elongation_factor_Elf1,_Zn_ribbon-containing_protein	J	COG4888	Transcription_elongation_factor_Elf1,_contains_Zn-ribbon_domain	K	-
SRVP_Atabeya-2-AMLJHBDE_07240	SRVP_Atabeya-2_724 # 676424 # 678193 # -1 # ID=1_724;partial=00;start_type=ATG;rbs_motif=GGAG/GAGG;rbs_spacer=5-10bp;gc_cont=0.453	SRVP_Atabeya-2_724	SR-VP_11_27_2022_S1_100cm_MT	6	676424	678193	1770	11625022	0.291598	arCOG01510	RPA1	Single-stranded_DNA-binding_replication_protein_A_(RPA),_large_(70_kD)_subunit_or_related_ssDNA-binding_protein	L	COG1599	ssDNA-binding_replication_factor_A,_large_subunit	L	-
SRVP_Atabeya-2-AMLJHBDE_07260	SRVP_Atabeya-2_726 # 679720 # 680943 # -1 # ID=1_726;partial=00;start_type=ATG;rbs_motif=AGGAGG;rbs_spacer=5-10bp;gc_cont=0.467	SRVP_Atabeya-2_726	SR-VP_11_27_2022_S1_100cm_MT	5	679720	680943	1224	11625022	0.351394	arCOG00496	Pgk	3-phosphoglycerate_kinase	G	COG0126	3-phosphoglycerate_kinase	G	Glycolysis
SRVP_Atabeya-2-AMLJHBDE_07290	SRVP_Atabeya-2_729 # 682994 # 683797 # -1 # ID=1_729;partial=00;start_type=ATG;rbs_motif=AGGAGG;rbs_spacer=5-10bp;gc_cont=0.437	SRVP_Atabeya-2_729	SR-VP_11_27_2022_S1_100cm_MT	1	682994	683797	804	11625022	0.106992	arCOG00600	-	CBS_domain	R	COG2524	Predicted_transcriptional_regulator,_contains_C-terminal_CBS_domains	K	-
SRVP_Atabeya-2-AMLJHBDE_07320	SRVP_Atabeya-2_732 # 686376 # 686924 # 1 # ID=1_732;partial=00;start_type=TTG;rbs_motif=GGA/GAG/AGG;rbs_spacer=5-10bp;gc_cont=0.444	SRVP_Atabeya-2_732	SR-VP_11_27_2022_S1_100cm_MT	2	686376	686924	549	11625022	0.313375	arCOG01580	-	DNA-binding_transcriptional_regulator,_Lrp_family	K	COG1522	DNA-binding_transcriptional_regulator,_Lrp_family	K	-
SRVP_Atabeya-2-AMLJHBDE_07370	SRVP_Atabeya-2_737 # 690068 # 691765 # 1 # ID=1_737;partial=00;start_type=TTG;rbs_motif=GGxGG;rbs_spacer=5-10bp;gc_cont=0.481	SRVP_Atabeya-2_737	SR-VP_11_27_2022_S1_60cm_MT	1	690068	691765	1698	1990488	0.295871	arCOG00571	SdhA	Succinate_dehydrogenase/fumarate_reductase,_flavoprotein_subunit	C	COG0029	Aspartate_oxidase	H	NAD_biosynthesis
SRVP_Atabeya-2-AMLJHBDE_07390	SRVP_Atabeya-2_739 # 693710 # 694750 # 1 # ID=1_739;partial=00;start_type=ATG;rbs_motif=None;rbs_spacer=None;gc_cont=0.447	SRVP_Atabeya-2_739	SR-VP_11_27_2022_S1_100cm_MT	1	693710	694750	1041	11625022	0.0826334	-	-	-	-	-	-	-	-
SRVP_Atabeya-2-AMLJHBDE_07440	SRVP_Atabeya-2_744 # 697400 # 698590 # 1 # ID=1_744;partial=00;start_type=ATG;rbs_motif=AGGAG/GGAGG;rbs_spacer=11-12bp;gc_cont=0.471	SRVP_Atabeya-2_744	SR-VP_11_27_2022_S1_100cm_MT	1	697400	698590	1191	11625022	0.0722261	arCOG04281	DnaG	DNA_primase_(bacterial_type)	L	COG0358	DNA_primase_(bacterial_type)	L	-
SRVP_Atabeya-2-AMLJHBDE_07510	SRVP_Atabeya-2_751 # 703568 # 704698 # -1 # ID=1_751;partial=00;start_type=ATG;rbs_motif=3Base/5BMM;rbs_spacer=13-15bp;gc_cont=0.464	SRVP_Atabeya-2_751	SR-VP_11_27_2022_S1_100cm_MT	5	703568	704698	1131	11625022	0.380289	arCOG04163	-	Predicted_ATPase_(AAA+_superfamily)	R	COG1223	Predicted_ATPase,_AAA+_superfamily	R	-
SRVP_Atabeya-2-AMLJHBDE_07520	SRVP_Atabeya-2_752 # 704919 # 705482 # 1 # ID=1_752;partial=00;start_type=TTG;rbs_motif=AGGAG/GGAGG;rbs_spacer=11-12bp;gc_cont=0.493	SRVP_Atabeya-2_752	SR-VP_11_27_2022_S1_100cm_MT	2	704919	705482	564	11625022	0.30504	arCOG01736	LigT	2-5_RNA_ligase	J	COG1514	RNA_2',3'-cyclic_phosphodiesterase_(2'-5'_RNA_ligase)	J	-
SRVP_Atabeya-2-AMLJHBDE_07540	SRVP_Atabeya-2_754 # 706943 # 708112 # -1 # ID=1_754;partial=00;start_type=ATG;rbs_motif=GGAGG;rbs_spacer=5-10bp;gc_cont=0.485	SRVP_Atabeya-2_754	SR-VP_11_27_2022_S1_100cm_MT	1	706943	708112	1170	11625022	0.0735225	arCOG02447	-	Uncharacterized_protein	S	COG2006	Uncharacterized_conserved_protein,_DUF362_family	S	-
SRVP_Atabeya-2-AMLJHBDE_07600	SRVP_Atabeya-2_760 # 716744 # 717298 # -1 # ID=1_760;partial=00;start_type=GTG;rbs_motif=AGGAGG;rbs_spacer=11-12bp;gc_cont=0.463	SRVP_Atabeya-2_760	SR-VP_11_27_2022_S1_100cm_MT	3	716744	717298	555	11625022	0.46498	arCOG00552	-	DNA_replication_initiation_complex_subunit,_GINS23_family	L	COG1711	DNA_replication_initiation_complex_subunit,_GINS_family	L	-
SRVP_Atabeya-2-AMLJHBDE_07660	SRVP_Atabeya-2_766 # 721408 # 721815 # -1 # ID=1_766;partial=00;start_type=TTG;rbs_motif=GGA/GAG/AGG;rbs_spacer=11-12bp;gc_cont=0.449	SRVP_Atabeya-2_766	SR-VP_11_27_2022_S1_100cm_MT	4	721408	721815	408	11625022	0.843346	arCOG02408	-	Uncharacterized_NYN_domain_containing_protein,_LabA_family	S	COG1432	NYN_domain,_predicted_PIN-related_RNAse,_tRNA/rRNA_maturation	R	-
SRVP_Atabeya-2-AMLJHBDE_07670	SRVP_Atabeya-2_767 # 721903 # 722676 # -1 # ID=1_767;partial=00;start_type=TTG;rbs_motif=GGAG/GAGG;rbs_spacer=5-10bp;gc_cont=0.461	SRVP_Atabeya-2_767	SR-VP_11_27_2022_S1_100cm_MT	37	721903	722676	774	11625022	4.11213	arCOG01532	UppS	Undecaprenyl_pyrophosphate_synthase	I	COG0020	Undecaprenyl_pyrophosphate_synthase	I	-
SRVP_Atabeya-2-AMLJHBDE_07690	SRVP_Atabeya-2_769 # 723297 # 723875 # -1 # ID=1_769;partial=00;start_type=GTG;rbs_motif=AGxAGG/AGGxGG;rbs_spacer=5-10bp;gc_cont=0.434	SRVP_Atabeya-2_769	SR-VP_11_27_2022_S1_100cm_MT	2	723297	723875	579	11625022	0.297138	arCOG00362	Srp102	Signal_recognition_particle_receptor_subunit_beta,_a_GTPase	U	COG2229	Signal_recognition_particle_receptor_subunit_beta,_a_GTPase	U	-
SRVP_Atabeya-2-AMLJHBDE_07780	SRVP_Atabeya-2_778 # 730201 # 730587 # -1 # ID=1_778;partial=00;start_type=TTG;rbs_motif=GGAG/GAGG;rbs_spacer=5-10bp;gc_cont=0.494	SRVP_Atabeya-2_778	SR-VP_11_27_2022_S1_80cm_MT	1	730201	730587	387	4000856	0.645857	arCOG04154	RPS8A	Ribosomal_protein_S8E	J	COG2007	Ribosomal_protein_S8E	J	Archaeal_ribosomal_proteins
SRVP_Atabeya-2-AMLJHBDE_07840	SRVP_Atabeya-2_784 # 736905 # 738140 # -1 # ID=1_784;partial=00;start_type=TTG;rbs_motif=GGAGG;rbs_spacer=5-10bp;gc_cont=0.471	SRVP_Atabeya-2_784	SR-VP_11_27_2022_S1_100cm_MT	1	736905	738140	1236	11625022	0.0695966	arCOG01923	SIK1	RNA_processing_factor_Prp31,_contains_Nop_domain	J	COG1498	Box_C/D_ribonucleoprotein_Nop56/Prp31/SIK1_subunit	J	-
SRVP_Atabeya-2-AMLJHBDE_07900	SRVP_Atabeya-2_790 # 742368 # 743648 # 1 # ID=1_790;partial=00;start_type=GTG;rbs_motif=GGA/GAG/AGG;rbs_spacer=5-10bp;gc_cont=0.467	SRVP_Atabeya-2_790	SR-VP_11_27_2022_S1_100cm_MT	2	742368	743648	1281	11625022	0.134303	arCOG00217	MoeA	Molybdopterin_biosynthesis_enzyme	H	COG0303	Molybdopterin_Mo-transferase_(molybdopterin_biosynthesis)	H	Molybdopterin_biosynthesis
SRVP_Atabeya-2-AMLJHBDE_07920	SRVP_Atabeya-2_792 # 744187 # 745008 # -1 # ID=1_792;partial=00;start_type=GTG;rbs_motif=GGA/GAG/AGG;rbs_spacer=5-10bp;gc_cont=0.446	SRVP_Atabeya-2_792	SR-VP_11_27_2022_S2_40cm_MT	1	744187	745008	822	4025082	0.302241	arCOG04449	TruA	Pseudouridylate_synthase	J	COG0101	tRNA_U38,U39,U40_pseudouridine_synthase_TruA	J	tRNA_modification
SRVP_Atabeya-2-AMLJHBDE_08000	SRVP_Atabeya-2_800 # 754248 # 754622 # -1 # ID=1_800;partial=00;start_type=ATG;rbs_motif=AGGAGG;rbs_spacer=11-12bp;gc_cont=0.501	SRVP_Atabeya-2_800	SR-VP_11_27_2022_S1_100cm_MT	76	754248	754622	375	11625022	17.4337	arCOG01843	-	Sterol_carrier_protein	I	COG3255	Putative_sterol_carrier_protein,_contains_SCP2_domain	I	-
SRVP_Atabeya-2-AMLJHBDE_08030	SRVP_Atabeya-2_803 # 756452 # 757267 # -1 # ID=1_803;partial=00;start_type=TTG;rbs_motif=AGGAGG;rbs_spacer=5-10bp;gc_cont=0.458	SRVP_Atabeya-2_803	SR-VP_11_27_2022_S1_100cm_MT	2	756452	757267	816	11625022	0.210837	arCOG01880	SEC59	Dolichol_kinase	I	COG0170	Dolichol_kinase	OM	-
SRVP_Atabeya-2-AMLJHBDE_08050	SRVP_Atabeya-2_805 # 758347 # 758877 # -1 # ID=1_805;partial=00;start_type=TTG;rbs_motif=AGGAGG;rbs_spacer=5-10bp;gc_cont=0.435	SRVP_Atabeya-2_805	SR-VP_11_27_2022_S1_100cm_MT	1	758347	758877	531	11625022	0.161999	arCOG01858	-	Predicted_HD_superfamily_hydrolase	R	COG1418	HD_superfamily_phosphodieaserase,_includes_HD_domain_of_RNase_Y	JR	-
SRVP_Atabeya-2-AMLJHBDE_08060	SRVP_Atabeya-2_806 # 758948 # 759976 # -1 # ID=1_806;partial=00;start_type=TTG;rbs_motif=GGAG/GAGG;rbs_spacer=5-10bp;gc_cont=0.480	SRVP_Atabeya-2_806	SR-VP_11_27_2022_S1_100cm_MT	6	758948	759976	1029	11625022	0.501582	arCOG04387	PurA	Adenylosuccinate_synthase	F	COG0104	Adenylosuccinate_synthase	F	Purine_biosynthesis
SRVP_Atabeya-2-AMLJHBDE_08100	SRVP_Atabeya-2_810 # 765780 # 767483 # 1 # ID=1_810;partial=00;start_type=ATG;rbs_motif=GGAG/GAGG;rbs_spacer=5-10bp;gc_cont=0.452	SRVP_Atabeya-2_810	SR-VP_11_27_2022_S1_100cm_MT	1	765780	767483	1704	11625022	0.050482	arCOG00063	PyrG	CTP_synthase_(UTP-ammonia_lyase)	F	COG0504	CTP_synthase_(UTP-ammonia_lyase)	F	Pyrimidine_biosynthesis
SRVP_Atabeya-2-AMLJHBDE_08170	SRVP_Atabeya-2_817 # 772882 # 774558 # -1 # ID=1_817;partial=00;start_type=ATG;rbs_motif=GGA/GAG/AGG;rbs_spacer=11-12bp;gc_cont=0.447	SRVP_Atabeya-2_817	SR-VP_11_27_2022_S1_100cm_MT	2	772882	774558	1677	11625022	0.10259	arCOG00412	PheT	Phenylalanyl-tRNA_synthetase_beta_subunit	J	COG0072	Phenylalanyl-tRNA_synthetase_beta_subunit	J	Aminoacyl-tRNA_synthetases
SRVP_Atabeya-2-AMLJHBDE_08180	SRVP_Atabeya-2_818 # 774573 # 776096 # -1 # ID=1_818;partial=00;start_type=TTG;rbs_motif=GGA/GAG/AGG;rbs_spacer=5-10bp;gc_cont=0.466	SRVP_Atabeya-2_818	SR-VP_11_27_2022_S1_100cm_MT	6	774573	776096	1524	11625022	0.338667	arCOG00410	PheS	Phenylalanyl-tRNA_synthetase_alpha_subunit	J	COG0016	Phenylalanyl-tRNA_synthetase_alpha_subunit	J	Aminoacyl-tRNA_synthetases
SRVP_Atabeya-2-AMLJHBDE_08240	SRVP_Atabeya-2_824 # 781380 # 782450 # 1 # ID=1_824;partial=00;start_type=ATG;rbs_motif=GGAG/GAGG;rbs_spacer=5-10bp;gc_cont=0.493	SRVP_Atabeya-2_824	SR-VP_11_27_2022_S1_100cm_MT	2	781380	782450	1071	11625022	0.160637	arCOG01767	PksG	3-hydroxy-3-methylglutaryl_CoA_synthase	I	COG3425	3-hydroxy-3-methylglutaryl_CoA_synthase	I	Isoprenoid_biosynthesis
SRVP_Atabeya-2-AMLJHBDE_08250	SRVP_Atabeya-2_825 # 782472 # 783629 # 1 # ID=1_825;partial=00;start_type=TTG;rbs_motif=GGA/GAG/AGG;rbs_spacer=11-12bp;gc_cont=0.483	SRVP_Atabeya-2_825	SR-VP_11_27_2022_S1_100cm_MT	1	782472	783629	1158	11625022	0.0742844	arCOG01278	PaaJ	Acetyl-CoA_acetyltransferase	I	COG0183	Acetyl-CoA_acetyltransferase	I	Fatty_acid_biosynthesis
SRVP_Atabeya-2-AMLJHBDE_08280	SRVP_Atabeya-2_828 # 785549 # 787858 # 1 # ID=1_828;partial=00;start_type=ATG;rbs_motif=GGAG/GAGG;rbs_spacer=5-10bp;gc_cont=0.448	SRVP_Atabeya-2_828	SR-VP_11_27_2022_S1_100cm_MT	3	785549	787858	2310	11625022	0.111716	arCOG04889	NrdD	Oxygen-sensitive_ribonucleoside-triphosphate_reductase	F	COG1328	Anaerobic_ribonucleoside-triphosphate_reductase	F	Thymidylate_biosynthesis
SRVP_Atabeya-2-AMLJHBDE_08330	SRVP_Atabeya-2_833 # 789904 # 790614 # 1 # ID=1_833;partial=00;start_type=ATG;rbs_motif=GGAG/GAGG;rbs_spacer=5-10bp;gc_cont=0.457	SRVP_Atabeya-2_833	SR-VP_11_27_2022_S1_100cm_MT	2	789904	790614	711	11625022	0.241973	arCOG01122	RpiA	Ribose_5-phosphate_isomerase	G	COG0120	Ribose_5-phosphate_isomerase	G	Pentose_phosphate_pathway
SRVP_Atabeya-2-AMLJHBDE_08350	SRVP_Atabeya-2_835 # 791629 # 791784 # 1 # ID=1_835;partial=00;start_type=TTG;rbs_motif=GGxGG;rbs_spacer=5-10bp;gc_cont=0.558	SRVP_Atabeya-2_835	SR-VP_11_27_2022_S1_80cm_MT	1	791629	791784	156	4000856	1.60222	-	-	-	-	-	-	-	-
SRVP_Atabeya-2-AMLJHBDE_08380	SRVP_Atabeya-2_838 # 793559 # 794479 # 1 # ID=1_838;partial=00;start_type=ATG;rbs_motif=GGA/GAG/AGG;rbs_spacer=5-10bp;gc_cont=0.459	SRVP_Atabeya-2_838	SR-VP_11_27_2022_S1_100cm_MT	4	793559	794479	921	11625022	0.3736	arCOG01482	NadC	Nicotinate-nucleotide_pyrophosphorylase	H	COG0157	Nicotinate-nucleotide_pyrophosphorylase	H	NAD_biosynthesis
SRVP_Atabeya-2-AMLJHBDE_08440	SRVP_Atabeya-2_844 # 798587 # 799612 # 1 # ID=1_844;partial=00;start_type=TTG;rbs_motif=AGGAGG;rbs_spacer=5-10bp;gc_cont=0.475	SRVP_Atabeya-2_844	SR-VP_11_27_2022_S1_100cm_MT	1	798587	799612	1026	11625022	0.0838415	arCOG01546	NuoH	NADH_dehydrogenase_subunit_H	C	COG1005	NADH:ubiquinone_oxidoreductase_subunit_1_(chain_H)	C	NADH_dehydrogenase
SRVP_Atabeya-2-AMLJHBDE_08460	SRVP_Atabeya-2_846 # 800230 # 801024 # 1 # ID=1_846;partial=00;start_type=ATG;rbs_motif=GGAG/GAGG;rbs_spacer=5-10bp;gc_cont=0.478	SRVP_Atabeya-2_846	SR-VP_11_27_2022_S1_100cm_MT	5	800230	801024	795	11625022	0.541015	arCOG00446	FixA	Electron_transfer_flavoprotein,_beta_subunit	C	COG2086	Electron_transfer_flavoprotein,_alpha_and_beta_subunits	C	-
SRVP_Atabeya-2-AMLJHBDE_08480	SRVP_Atabeya-2_848 # 802364 # 803563 # 1 # ID=1_848;partial=00;start_type=TTG;rbs_motif=GGAG/GAGG;rbs_spacer=5-10bp;gc_cont=0.491	SRVP_Atabeya-2_848	SR-VP_11_27_2022_S1_100cm_MT	2	802364	803563	1200	11625022	0.143369	arCOG04310	CaiA	Acyl-CoA_dehydrogenase	I	COG1960	Acyl-CoA_dehydrogenase_related_to_the_alkylation_response_protein_AidB	I	Fatty_acid_biosynthesis
SRVP_Atabeya-2-AMLJHBDE_08530	SRVP_Atabeya-2_853 # 807360 # 808382 # 1 # ID=1_853;partial=00;start_type=ATG;rbs_motif=None;rbs_spacer=None;gc_cont=0.457	SRVP_Atabeya-2_853	SR-VP_11_27_2022_S1_100cm_MT	26	807360	808382	1023	11625022	2.18627	arCOG03140	-	Transcriptional_regulator,_contains_HTH_domain	K	COG4742	Predicted_transcriptional_regulator,_contains_HTH_domain	K	-
SRVP_Atabeya-2-AMLJHBDE_08590	SRVP_Atabeya-2_859 # 812171 # 814087 # 1 # ID=1_859;partial=00;start_type=TTG;rbs_motif=GGAG/GAGG;rbs_spacer=5-10bp;gc_cont=0.471	SRVP_Atabeya-2_859	SR-VP_11_27_2022_S1_100cm_MT	6	812171	814087	1917	11625022	0.269237	arCOG01609	-	Indolepyruvate_ferredoxin_oxidoreductase,_alpha_and_beta_subunit	C	COG0674	Pyruvate:ferredoxin_oxidoreductase_or_related_2-oxoacid:ferredoxin_oxidoreductase,_alpha_subunit	C	Pyruvate_oxidation
SRVP_Atabeya-2-AMLJHBDE_08620	SRVP_Atabeya-2_862 # 815998 # 817044 # -1 # ID=1_862;partial=00;start_type=GTG;rbs_motif=AGGAG/GGAGG;rbs_spacer=11-12bp;gc_cont=0.504	SRVP_Atabeya-2_862	SR-VP_11_27_2022_S1_100cm_MT	2	815998	817044	1047	11625022	0.16432	arCOG01455	AdhP	Zn-dependent_alcohol_dehydrogenase	R	COG1063	Threonine_dehydrogenase_or_related_Zn-dependent_dehydrogenase	ER	Non-phosphorylated_Entner-Doudoroff_pathway
SRVP_Atabeya-2-AMLJHBDE_08630	SRVP_Atabeya-2_863 # 817087 # 817314 # -1 # ID=1_863;partial=00;start_type=TTG;rbs_motif=AGGAG;rbs_spacer=5-10bp;gc_cont=0.504	SRVP_Atabeya-2_863	SR-VP_11_27_2022_S1_100cm_MT	1	817087	817314	228	11625022	0.377287	arCOG02144	HHT1	Histones_H3_and_H4	L	COG2036	Archaeal_histone_H3/H4	B	-
SRVP_Atabeya-2-AMLJHBDE_08660	SRVP_Atabeya-2_866 # 818381 # 819151 # -1 # ID=1_866;partial=00;start_type=TTG;rbs_motif=AGGA/GGAG/GAGG;rbs_spacer=11-12bp;gc_cont=0.488	SRVP_Atabeya-2_866	SR-VP_11_27_2022_S1_100cm_MT	1	818381	819151	771	11625022	0.111571	arCOG02189	NapF	HTH_containing_ranscriptional_regulator_fused_to_ferredoxin_domain	C	COG1149	MinD_superfamily_P-loop_ATPase,_contains_an_inserted_ferredoxin_domain	R	-
SRVP_Atabeya-2-AMLJHBDE_08730	SRVP_Atabeya-2_873 # 827416 # 828750 # -1 # ID=1_873;partial=00;start_type=ATG;rbs_motif=None;rbs_spacer=None;gc_cont=0.481	SRVP_Atabeya-2_873	SR-VP_11_27_2022_S1_100cm_MT	20	827416	828750	1335	11625022	1.28871	arCOG02236	HdrA	Heterodisulfide_reductase,_subunit_A_or_related_polyferredoxin	C	COG2221	Dissimilatory_sulfite_reductase_(desulfoviridin),_alpha_and_beta_subunits	P	-
SRVP_Atabeya-2-AMLJHBDE_08740	SRVP_Atabeya-2_874 # 828766 # 829155 # -1 # ID=1_874;partial=00;start_type=GTG;rbs_motif=GGA/GAG/AGG;rbs_spacer=5-10bp;gc_cont=0.497	SRVP_Atabeya-2_874	SR-VP_11_27_2022_S1_100cm_MT	5	828766	829155	390	11625022	1.10284	arCOG02476	HdrA	Heterodisulfide_reductase,_subunit_A;_ferredoxin_domain	C	COG1233	Phytoene_dehydrogenase-related_protein	Q	-
SRVP_Atabeya-2-AMLJHBDE_08750	SRVP_Atabeya-2_875 # 829441 # 830115 # -1 # ID=1_875;partial=00;start_type=ATG;rbs_motif=AGGAGG;rbs_spacer=5-10bp;gc_cont=0.479	SRVP_Atabeya-2_875	SR-VP_11_27_2022_S1_100cm_MT	3	829441	830115	675	11625022	0.382317	arCOG02180	NapF	Polyferredoxin	C	COG2221	Dissimilatory_sulfite_reductase_(desulfoviridin),_alpha_and_beta_subunits	P	-
SRVP_Atabeya-2-AMLJHBDE_08790	SRVP_Atabeya-2_879 # 831531 # 832841 # 1 # ID=1_879;partial=00;start_type=TTG;rbs_motif=GGAG/GAGG;rbs_spacer=5-10bp;gc_cont=0.467	SRVP_Atabeya-2_879	SR-VP_11_27_2022_S1_100cm_MT	2	831531	832841	1311	11625022	0.13123	arCOG01499	FwdB	Formylmethanofuran_dehydrogenase_subunit_B	C	COG1153	Formylmethanofuran_dehydrogenase_subunit_D	C	-
SRVP_Atabeya-2-AMLJHBDE_08800	SRVP_Atabeya-2_880 # 833116 # 833967 # 1 # ID=1_880;partial=00;start_type=ATG;rbs_motif=AGGAGG;rbs_spacer=11-12bp;gc_cont=0.482	SRVP_Atabeya-2_880	SR-VP_11_27_2022_S1_100cm_MT	3	833116	833967	852	11625022	0.302892	arCOG04382	Mtd	Coenzyme_F420-dependent_N(5),N(10)-methenyltetrahydromethanopterin_dehydrogenase	C	COG1927	F420-dependent_methylenetetrahydromethanopterin_dehydrogenase	C	-
SRVP_Atabeya-2-AMLJHBDE_08830	SRVP_Atabeya-2_883 # 836020 # 838368 # 1 # ID=1_883;partial=00;start_type=ATG;rbs_motif=AGGAGG;rbs_spacer=11-12bp;gc_cont=0.484	SRVP_Atabeya-2_883	SR-VP_11_27_2022_S1_100cm_MT	5	836020	838368	2349	11625022	0.183102	arCOG02428	CdhA	CO_dehydrogenase/acetyl-CoA_synthase_alpha_subunit	C	COG1152	CO_dehydrogenase/acetyl-CoA_synthase_alpha_subunit	C	-
SRVP_Atabeya-2-AMLJHBDE_08840	SRVP_Atabeya-2_884 # 838396 # 838932 # 1 # ID=1_884;partial=00;start_type=TTG;rbs_motif=GGAG/GAGG;rbs_spacer=5-10bp;gc_cont=0.451	SRVP_Atabeya-2_884	SR-VP_11_27_2022_S1_100cm_MT	1	838396	838932	537	11625022	0.160189	arCOG04408	CdhB	CO_dehydrogenase/acetyl-CoA_synthase_epsilon_subunit	C	COG1880	CO_dehydrogenase/acetyl-CoA_synthase_epsilon_subunit	C	-
SRVP_Atabeya-2-AMLJHBDE_08850	SRVP_Atabeya-2_885 # 839326 # 840726 # 1 # ID=1_885;partial=00;start_type=ATG;rbs_motif=GGA/GAG/AGG;rbs_spacer=5-10bp;gc_cont=0.475	SRVP_Atabeya-2_885	SR-VP_11_27_2022_S1_100cm_MT	8	839326	840726	1401	11625022	0.4912	arCOG04360	CdhC	CO_dehydrogenase/acetyl-CoA_synthase_beta_subunit	C	COG1614	CO_dehydrogenase/acetyl-CoA_synthase_beta_subunit	C	-
SRVP_Atabeya-2-AMLJHBDE_08860	SRVP_Atabeya-2_886 # 840792 # 841994 # 1 # ID=1_886;partial=00;start_type=ATG;rbs_motif=AGGAGG;rbs_spacer=11-12bp;gc_cont=0.492	SRVP_Atabeya-2_886	SR-VP_11_27_2022_S1_100cm_MT	14	840792	841994	1203	11625022	1.00108	arCOG01980	CdhD	CO_dehydrogenase/acetyl-CoA_synthase_delta_subunit_(corrinoid_Fe-S_protein)	C	COG2069	CO_dehydrogenase/acetyl-CoA_synthase_delta_subunit_(corrinoid_Fe-S_protein)	C	-
SRVP_Atabeya-2-AMLJHBDE_08870	SRVP_Atabeya-2_887 # 842019 # 843809 # 1 # ID=1_887;partial=00;start_type=ATG;rbs_motif=AGGAG(G)/GGAGG;rbs_spacer=13-15bp;gc_cont=0.480	SRVP_Atabeya-2_887	SR-VP_11_27_2022_S1_100cm_MT	41	842019	843809	1791	11625022	1.96922	arCOG01979	CdhE	CO_dehydrogenase/acetyl-CoA_synthase_gamma_subunit_(corrinoid_Fe-S_protein)	C	COG1456	CO_dehydrogenase/acetyl-CoA_synthase_gamma_subunit_(corrinoid_Fe-S_protein)	C	-
SRVP_Atabeya-2-AMLJHBDE_08890	SRVP_Atabeya-2_889 # 844706 # 846472 # 1 # ID=1_889;partial=00;start_type=ATG;rbs_motif=GGA/GAG/AGG;rbs_spacer=5-10bp;gc_cont=0.467	SRVP_Atabeya-2_889	SR-VP_11_27_2022_S1_100cm_MT	3	844706	846472	1767	11625022	0.146046	arCOG04232	Sbm	Methylmalonyl-CoA_mutase	I	COG1884	Methylmalonyl-CoA_mutase,_N-terminal_domain/subunit	I	-
SRVP_Atabeya-2-AMLJHBDE_08890	SRVP_Atabeya-2_889 # 844706 # 846472 # 1 # ID=1_889;partial=00;start_type=ATG;rbs_motif=GGA/GAG/AGG;rbs_spacer=5-10bp;gc_cont=0.467	SRVP_Atabeya-2_889	SR-VP_11_27_2022_S1_60cm_MT	1	844706	846472	1767	1990488	0.284318	arCOG04232	Sbm	Methylmalonyl-CoA_mutase	I	COG1884	Methylmalonyl-CoA_mutase,_N-terminal_domain/subunit	I	-
SRVP_Atabeya-2-AMLJHBDE_08960	SRVP_Atabeya-2_896 # 852791 # 853366 # 1 # ID=1_896;partial=00;start_type=TTG;rbs_motif=AGGAG(G)/GGAGG;rbs_spacer=13-15bp;gc_cont=0.481	SRVP_Atabeya-2_896	SR-VP_11_27_2022_S1_100cm_MT	7	852791	853366	576	11625022	1.0454	arCOG00970	PRE1	20S_proteasome,_beta_subunit	O	COG0638	20S_proteasome,_alpha_and_beta_subunits	O	-
SRVP_Atabeya-2-AMLJHBDE_09000	SRVP_Atabeya-2_900 # 855846 # 856037 # 1 # ID=1_900;partial=00;start_type=ATG;rbs_motif=GGAGG;rbs_spacer=5-10bp;gc_cont=0.469	SRVP_Atabeya-2_900	SR-VP_11_27_2022_S1_100cm_MT	3	855846	856037	192	11625022	1.34408	-	-	-	-	-	-	-	-
SRVP_Atabeya-2-AMLJHBDE_09010	SRVP_Atabeya-2_901 # 856087 # 857031 # 1 # ID=1_901;partial=00;start_type=TTG;rbs_motif=None;rbs_spacer=None;gc_cont=0.467	SRVP_Atabeya-2_901	SR-VP_11_27_2022_S1_100cm_MT	4	856087	857031	945	11625022	0.364112	arCOG01085	PcrB	(S)-3-O-geranylgeranylglyceryl_phosphate_synthase,_TIM-barrel_fold	I	COG1646	Glycerol-1-phosphate_heptaprenyltransferase	I	-
SRVP_Atabeya-2-AMLJHBDE_09090	SRVP_Atabeya-2_909 # 864341 # 865264 # 1 # ID=1_909;partial=00;start_type=GTG;rbs_motif=4Base/6BMM;rbs_spacer=13-15bp;gc_cont=0.468	SRVP_Atabeya-2_909	SR-VP_11_27_2022_S1_100cm_MT	16	864341	865264	924	11625022	1.48955	arCOG00475	MetF	5,10-methylenetetrahydrofolate_reductase	E	COG0685	5,10-methylenetetrahydrofolate_reductase	E	-
SRVP_Atabeya-2-AMLJHBDE_09140	SRVP_Atabeya-2_914 # 867988 # 868983 # 1 # ID=1_914;partial=00;start_type=ATG;rbs_motif=GGA/GAG/AGG;rbs_spacer=5-10bp;gc_cont=0.494	SRVP_Atabeya-2_914	SR-VP_11_27_2022_S1_100cm_MT	1	867988	868983	996	11625022	0.0863668	arCOG02410	Mer	Coenzyme_F420-dependent_N5,N10-methylene_tetrahydromethanopterin_reductase_or_related_flavin-dependent_oxidoreductase	C	-	-	-	-
SRVP_Atabeya-2-AMLJHBDE_09190	SRVP_Atabeya-2_919 # 873709 # 875178 # 1 # ID=1_919;partial=00;start_type=ATG;rbs_motif=GGAGG;rbs_spacer=5-10bp;gc_cont=0.476	SRVP_Atabeya-2_919	SR-VP_11_27_2022_S1_100cm_MT	3	873709	875178	1470	11625022	0.175554	arCOG01340	-	Acyl-CoA_synthetase_(NDP_forming)	C	COG1042	Acyl-CoA_synthetase_(NDP_forming)	C	-
SRVP_Atabeya-2-AMLJHBDE_09230	SRVP_Atabeya-2_923 # 878997 # 879908 # -1 # ID=1_923;partial=00;start_type=ATG;rbs_motif=GGA/GAG/AGG;rbs_spacer=11-12bp;gc_cont=0.469	SRVP_Atabeya-2_923	SR-VP_11_27_2022_S1_100cm_MT	6	878997	879908	912	11625022	0.56593	arCOG02472	FrhG	Coenzyme_F420-reducing_hydrogenase,_gamma_subunit	C	COG1941	Coenzyme_F420-reducing_hydrogenase,_gamma_subunit	C	-
SRVP_Atabeya-2-AMLJHBDE_09280	SRVP_Atabeya-2_928 # 884092 # 884862 # -1 # ID=1_928;partial=00;start_type=TTG;rbs_motif=GGA/GAG/AGG;rbs_spacer=3-4bp;gc_cont=0.431	SRVP_Atabeya-2_928	SR-VP_11_27_2022_S1_100cm_MT	1	884092	884862	771	11625022	0.111571	arCOG00587	CooC	CO_dehydrogenase_maturation_factor	O	COG3640	CO_dehydrogenase_nickel-insertion_accessory_protein_CooC1	O	-
SRVP_Atabeya-2-AMLJHBDE_09350	SRVP_Atabeya-2_935 # 891508 # 892875 # 1 # ID=1_935;partial=00;start_type=ATG;rbs_motif=None;rbs_spacer=None;gc_cont=0.456	SRVP_Atabeya-2_935	SR-VP_11_27_2022_S1_100cm_MT	4	891508	892875	1368	11625022	0.251524	arCOG00547	RnjA	mRNA_degradation_ribonuclease_J1/J2	J	COG0595	mRNA_degradation_ribonuclease_J1/J2	J	-
SRVP_Atabeya-2-AMLJHBDE_09360	SRVP_Atabeya-2_936 # 893135 # 894358 # 1 # ID=1_936;partial=00;start_type=ATG;rbs_motif=AGGAG/GGAGG;rbs_spacer=11-12bp;gc_cont=0.501	SRVP_Atabeya-2_936	SR-VP_11_27_2022_S1_100cm_MT	12	893135	894358	1224	11625022	0.843346	arCOG01278	PaaJ	Acetyl-CoA_acetyltransferase	I	COG0183	Acetyl-CoA_acetyltransferase	I	Fatty_acid_biosynthesis
SRVP_Atabeya-2-AMLJHBDE_09380	SRVP_Atabeya-2_938 # 894857 # 895990 # -1 # ID=1_938;partial=00;start_type=ATG;rbs_motif=AGGAG/GGAGG;rbs_spacer=11-12bp;gc_cont=0.488	SRVP_Atabeya-2_938	SR-VP_11_27_2022_S1_100cm_MT	1	894857	895990	1134	11625022	0.0758566	arCOG01707	CaiA	Acyl-CoA_dehydrogenase	I	COG1960	Acyl-CoA_dehydrogenase_related_to_the_alkylation_response_protein_AidB	I	Fatty_acid_biosynthesis
SRVP_Atabeya-2-AMLJHBDE_09390	SRVP_Atabeya-2_939 # 896205 # 897398 # -1 # ID=1_939;partial=00;start_type=TTG;rbs_motif=AGGAG/GGAGG;rbs_spacer=11-12bp;gc_cont=0.466	SRVP_Atabeya-2_939	SR-VP_11_27_2022_S1_100cm_MT	11	896205	897398	1194	11625022	0.792491	arCOG01547	HycE	Ni,Fe-hydrogenase_III_large_subunit_and_subunit_G	C	COG3261	Ni,Fe-hydrogenase_III_large_subunit	C	-
SRVP_Atabeya-2-AMLJHBDE_09430	SRVP_Atabeya-2_943 # 899313 # 900278 # 1 # ID=1_943;partial=00;start_type=TTG;rbs_motif=None;rbs_spacer=None;gc_cont=0.496	SRVP_Atabeya-2_943	SR-VP_11_27_2022_S1_100cm_MT	6	899313	900278	966	11625022	0.534294	arCOG00643	SelD	Selenophosphate_synthase	E	COG0309	Carbamoyl_dehydratase_HypE_(hydrogenase_maturation_factor)	O	-
SRVP_Atabeya-2-AMLJHBDE_09460	SRVP_Atabeya-2_946 # 901164 # 901487 # 1 # ID=1_946;partial=00;start_type=ATG;rbs_motif=AGGAGG;rbs_spacer=5-10bp;gc_cont=0.451	SRVP_Atabeya-2_946	SR-VP_11_27_2022_S1_100cm_MT	4	901164	901487	324	11625022	1.06199	arCOG03073	NuoK	NADH_dehydrogenase_subunit_4L_(K,kappa)	C	COG0713	NADH:ubiquinone_oxidoreductase_subunit_11_or_4L_(chain_K)	C	NADH_dehydrogenase
SRVP_Atabeya-2-AMLJHBDE_09470	SRVP_Atabeya-2_947 # 901514 # 903511 # 1 # ID=1_947;partial=00;start_type=ATG;rbs_motif=GGAGG;rbs_spacer=5-10bp;gc_cont=0.482	SRVP_Atabeya-2_947	SR-VP_11_27_2022_S1_100cm_MT	3	901514	903511	1998	11625022	0.129161	arCOG01539	NuoL	NADH_dehydrogenase_subunit__L	C	COG1009	Membrane_H+-translocase/NADH:ubiquinone_oxidoreductase_subunit_5_(chain_L)/Multisubunit_Na+/H+_antiporter,_MnhA_subunit	C	NADH_dehydrogenase
SRVP_Atabeya-2-AMLJHBDE_09560	SRVP_Atabeya-2_956 # 909062 # 909289 # -1 # ID=1_956;partial=00;start_type=ATG;rbs_motif=GGA/GAG/AGG;rbs_spacer=5-10bp;gc_cont=0.386	SRVP_Atabeya-2_956	SR-VP_11_27_2022_S1_40cm_MT	1	909062	909289	228	1473124	2.97732	-	-	-	-	-	-	-	-
SRVP_Atabeya-2-AMLJHBDE_09590	SRVP_Atabeya-2_959 # 910444 # 910755 # 1 # ID=1_959;partial=00;start_type=ATG;rbs_motif=3Base/5BMM;rbs_spacer=13-15bp;gc_cont=0.545	SRVP_Atabeya-2_959	SR-VP_11_27_2022_S1_100cm_MT	6	910444	910755	312	11625022	1.65426	arCOG01641	-	Cold_shock_responsive_RNA-binding_protein,_contains_TRAM_domain	O	COG3269	Predicted_RNA-binding_protein,_contains_TRAM_domain	R	-
SRVP_Atabeya-2-AMLJHBDE_09610	SRVP_Atabeya-2_961 # 911447 # 912514 # 1 # ID=1_961;partial=00;start_type=TTG;rbs_motif=AGGAGG;rbs_spacer=11-12bp;gc_cont=0.453	SRVP_Atabeya-2_961	SR-VP_11_27_2022_S1_100cm_MT	2	911447	912514	1068	11625022	0.161089	arCOG02459	NtpC	Archaeal/vacuolar-type_H+-ATPase_subunit_C	C	COG1527	Archaeal/vacuolar-type_H+-ATPase_subunit_C/Vma6	C	A/V-type_ATP_synthase
SRVP_Atabeya-2-AMLJHBDE_09650	SRVP_Atabeya-2_965 # 914294 # 916564 # 1 # ID=1_965;partial=00;start_type=ATG;rbs_motif=GGAG/GAGG;rbs_spacer=5-10bp;gc_cont=0.479	SRVP_Atabeya-2_965	SR-VP_11_27_2022_S1_100cm_MT	2	914294	916564	2271	11625022	0.0757564	arCOG04138	NtpI	Archaeal/vacuolar-type_H+-ATPase_subunit_I	C	COG1269	Archaeal/vacuolar-type_H+-ATPase_subunit_I/STV1	C	A/V-type_ATP_synthase
SRVP_Atabeya-2-AMLJHBDE_09670	SRVP_Atabeya-2_967 # 917511 # 918011 # -1 # ID=1_967;partial=00;start_type=ATG;rbs_motif=AGGA/GGAG/GAGG;rbs_spacer=11-12bp;gc_cont=0.465	SRVP_Atabeya-2_967	SR-VP_11_27_2022_S1_100cm_MT	2	917511	918011	501	11625022	0.343399	-	-	-	-	-	-	-	-
SRVP_Atabeya-2-AMLJHBDE_09680	SRVP_Atabeya-2_968 # 917995 # 918138 # -1 # ID=1_968;partial=00;start_type=ATG;rbs_motif=GGA/GAG/AGG;rbs_spacer=11-12bp;gc_cont=0.438	SRVP_Atabeya-2_968	SR-VP_11_27_2022_S1_100cm_MT	1	917995	918138	144	11625022	0.59737	-	-	-	-	-	-	-	-
SRVP_Atabeya-2-AMLJHBDE_09750	SRVP_Atabeya-2_975 # 922480 # 923292 # 1 # ID=1_975;partial=00;start_type=ATG;rbs_motif=GGA/GAG/AGG;rbs_spacer=5-10bp;gc_cont=0.483	SRVP_Atabeya-2_975	SR-VP_11_27_2022_S1_100cm_MT	2	922480	923292	813	11625022	0.211615	arCOG00081	PyrF	Orotidine-5-phosphate_decarboxylase	F	COG0284	Orotidine-5'-phosphate_decarboxylase	F	Pyrimidine_biosynthesis
SRVP_Atabeya-2-AMLJHBDE_09780	SRVP_Atabeya-2_978 # 924866 # 926404 # 1 # ID=1_978;partial=00;start_type=ATG;rbs_motif=AGGAG;rbs_spacer=5-10bp;gc_cont=0.465	SRVP_Atabeya-2_978	SR-VP_11_27_2022_S1_100cm_MT	2	924866	926404	1539	11625022	0.111789	arCOG00933	-	7,8-dihydro-6-hydroxymethylpterin_dimethyltransferase,_radical_SAM_superfamily_enzyme	H	COG1964	C-terminal_domain_of_the_GTP_3',8'-cyclase_MoaA,_radical_SAM_superfamily_(molybdenum_cofactor_biosynthesis)	H	-
SRVP_Atabeya-2-AMLJHBDE_09790	SRVP_Atabeya-2_979 # 926540 # 926704 # 1 # ID=1_979;partial=00;start_type=ATG;rbs_motif=AGGA/GGAG/GAGG;rbs_spacer=11-12bp;gc_cont=0.382	SRVP_Atabeya-2_979	SR-VP_11_27_2022_S1_100cm_MT	7	926540	926704	165	11625022	3.64939	-	-	-	-	-	-	-	-
SRVP_Atabeya-2-AMLJHBDE_09800	SRVP_Atabeya-2_980 # 926772 # 927713 # 1 # ID=1_980;partial=00;start_type=TTG;rbs_motif=AGGA/GGAG/GAGG;rbs_spacer=11-12bp;gc_cont=0.461	SRVP_Atabeya-2_980	SR-VP_11_27_2022_S1_100cm_MT	1	926772	927713	942	11625022	0.0913178	arCOG04395	CofD	LPPG:FO_2-phospho-L-lactate_transferase,_F420_biosynthesis_enzyme	H	COG0391	Archaeal_2-phospho-L-lactate_transferase/Bacterial_gluconeogenesis_factor,_CofD/UPF0052_family	GH	-
SRVP_Atabeya-2-AMLJHBDE_09820	SRVP_Atabeya-2_982 # 928389 # 929411 # -1 # ID=1_982;partial=00;start_type=ATG;rbs_motif=GGA/GAG/AGG;rbs_spacer=5-10bp;gc_cont=0.450	SRVP_Atabeya-2_982	SR-VP_11_27_2022_S1_100cm_MT	2	928389	929411	1023	11625022	0.168175	arCOG00724	-	Transcriptional_regulator,_PadR_family	K	COG3465	Uncharacterized_conserved_protein_YwgA	S	-
SRVP_Atabeya-2-AMLJHBDE_09850	SRVP_Atabeya-2_985 # 931823 # 932554 # 1 # ID=1_985;partial=00;start_type=ATG;rbs_motif=None;rbs_spacer=None;gc_cont=0.437	SRVP_Atabeya-2_985	SR-VP_11_27_2022_S1_100cm_MT	3	931823	932554	732	11625022	0.352546	arCOG02291	-	HAD_superfamily_hydrolase	R	COG1011	FMN_and_5-amino-6-(5-phospho-D-ribitylamino)uracil_phosphatase_YigB,_HAD_superfamily_(riboflavin_biosynthesis)	H	-
SRVP_Atabeya-2-AMLJHBDE_09850	SRVP_Atabeya-2_985 # 931823 # 932554 # 1 # ID=1_985;partial=00;start_type=ATG;rbs_motif=None;rbs_spacer=None;gc_cont=0.437	SRVP_Atabeya-2_985	SR-VP_11_27_2022_S2_40cm_MT	1	931823	932554	732	4025082	0.339402	arCOG02291	-	HAD_superfamily_hydrolase	R	COG1011	FMN_and_5-amino-6-(5-phospho-D-ribitylamino)uracil_phosphatase_YigB,_HAD_superfamily_(riboflavin_biosynthesis)	H	-
SRVP_Atabeya-2-AMLJHBDE_09850	SRVP_Atabeya-2_985 # 931823 # 932554 # 1 # ID=1_985;partial=00;start_type=ATG;rbs_motif=None;rbs_spacer=None;gc_cont=0.437	SRVP_Atabeya-2_985	SR-VP_11_27_2022_S1_60cm_MT	1	931823	932554	732	1990488	0.686324	arCOG02291	-	HAD_superfamily_hydrolase	R	COG1011	FMN_and_5-amino-6-(5-phospho-D-ribitylamino)uracil_phosphatase_YigB,_HAD_superfamily_(riboflavin_biosynthesis)	H	-
SRVP_Atabeya-2-AMLJHBDE_09860	SRVP_Atabeya-2_986 # 932684 # 933160 # -1 # ID=1_986;partial=00;start_type=TTG;rbs_motif=AGxAGG/AGGxGG;rbs_spacer=5-10bp;gc_cont=0.501	SRVP_Atabeya-2_986	SR-VP_11_27_2022_S1_100cm_MT	1	932684	933160	477	11625022	0.180338	arCOG01510	RPA1	Single-stranded_DNA-binding_replication_protein_A_(RPA),_large_(70_kD)_subunit_or_related_ssDNA-binding_protein	L	COG1599	ssDNA-binding_replication_factor_A,_large_subunit	L	-
SRVP_Atabeya-2-AMLJHBDE_09870	SRVP_Atabeya-2_987 # 933502 # 934929 # 1 # ID=1_987;partial=00;start_type=ATG;rbs_motif=GGAG/GAGG;rbs_spacer=5-10bp;gc_cont=0.455	SRVP_Atabeya-2_987	SR-VP_11_27_2022_S1_100cm_MT	2	933502	934929	1428	11625022	0.120478	-	-	-	-	COG4412	Bacillopeptidase_F,_M6_metalloprotease_family	O	-
SRVP_Atabeya-2-AMLJHBDE_09900	SRVP_Atabeya-2_990 # 936583 # 937671 # -1 # ID=1_990;partial=00;start_type=ATG;rbs_motif=GGAG/GAGG;rbs_spacer=5-10bp;gc_cont=0.466	SRVP_Atabeya-2_990	SR-VP_11_27_2022_S1_100cm_MT	19	936583	937671	1089	11625022	1.50083	-	-	-	-	-	-	-	-
SRVP_Atabeya-2-AMLJHBDE_09920	SRVP_Atabeya-2_992 # 937924 # 938214 # -1 # ID=1_992;partial=00;start_type=ATG;rbs_motif=GGA/GAG/AGG;rbs_spacer=5-10bp;gc_cont=0.478	SRVP_Atabeya-2_992	SR-VP_07_25_2022_A4_70cm_MT	1	937924	938214	291	19546	175.812	arCOG01327	Pnp	Purine_nucleoside_phosphorylase	F	COG0005	Purine_nucleoside_phosphorylase	F	Purine_salvage
SRVP_Atabeya-2-AMLJHBDE_09990	SRVP_Atabeya-2_999 # 943526 # 945370 # 1 # ID=1_999;partial=00;start_type=TTG;rbs_motif=GGA/GAG/AGG;rbs_spacer=5-10bp;gc_cont=0.460	SRVP_Atabeya-2_999	SR-VP_11_27_2022_S1_100cm_MT	5	943526	945370	1845	11625022	0.23312	arCOG01165	-	DNA_topoisomerase_VI,_subunit_B	L	COG1389	DNA_topoisomerase_VI,_subunit_B	L	-
SRVP_Atabeya-2-AMLJHBDE_10000	SRVP_Atabeya-2_1000 # 945309 # 946517 # 1 # ID=1_1000;partial=00;start_type=TTG;rbs_motif=AGGAG/GGAGG;rbs_spacer=11-12bp;gc_cont=0.455	SRVP_Atabeya-2_1000	SR-VP_11_27_2022_S1_100cm_MT	1	945309	946517	1209	11625022	0.0711508	arCOG04143	-	DNA_topoisomerase_VI,_subunit_A	L	COG1697	DNA_topoisomerase_VI,_subunit_A	L	-
SRVP_Atabeya-2-AMLJHBDE_10020	SRVP_Atabeya-2_1002 # 947260 # 948351 # -1 # ID=1_1002;partial=00;start_type=TTG;rbs_motif=GGAGG;rbs_spacer=5-10bp;gc_cont=0.458	SRVP_Atabeya-2_1002	SR-VP_11_27_2022_S1_100cm_MT	1	947260	948351	1092	11625022	0.0787741	arCOG01331	HtpX	Zn-dependent_protease_with_chaperone_function	O	COG0501	Zn-dependent_protease_with_chaperone_function	O	-
SRVP_Atabeya-2-AMLJHBDE_10030	SRVP_Atabeya-2_1003 # 948675 # 950783 # 1 # ID=1_1003;partial=00;start_type=ATG;rbs_motif=AGGA/GGAG/GAGG;rbs_spacer=11-12bp;gc_cont=0.478	SRVP_Atabeya-2_1003	SR-VP_11_27_2022_S1_100cm_MT	2	948675	950783	2109	11625022	0.0815755	arCOG01340	-	Acyl-CoA_synthetase_(NDP_forming)	C	COG1042	Acyl-CoA_synthetase_(NDP_forming)	C	-
SRVP_Atabeya-2-AMLJHBDE_10040	SRVP_Atabeya-2_1004 # 950863 # 951951 # 1 # ID=1_1004;partial=00;start_type=ATG;rbs_motif=GGAG/GAGG;rbs_spacer=5-10bp;gc_cont=0.464	SRVP_Atabeya-2_1004	SR-VP_11_27_2022_S1_100cm_MT	3	950863	951951	1089	11625022	0.236973	arCOG00099	Pta	BioD-like_N-terminal_domain_of_phosphotransacetylase	R	COG0857	BioD-like_N-terminal_domain_of_phosphotransacetylase	R	-
SRVP_Atabeya-2-AMLJHBDE_10070	SRVP_Atabeya-2_1007 # 954353 # 955120 # 1 # ID=1_1007;partial=00;start_type=ATG;rbs_motif=None;rbs_spacer=None;gc_cont=0.488	SRVP_Atabeya-2_1007	SR-VP_11_27_2022_S1_100cm_MT	8	954353	955120	768	11625022	0.896056	-	-	-	-	-	-	-	-
SRVP_Atabeya-2-AMLJHBDE_10110	SRVP_Atabeya-2_1011 # 958171 # 959112 # -1 # ID=1_1011;partial=00;start_type=ATG;rbs_motif=GGA/GAG/AGG;rbs_spacer=11-12bp;gc_cont=0.452	SRVP_Atabeya-2_1011	SR-VP_11_27_2022_S1_100cm_MT	4	958171	959112	942	11625022	0.365271	arCOG01369	WcaG	Nucleoside-diphosphate-sugar_epimerase	M	COG1088	dTDP-D-glucose_4,6-dehydratase	M	-
SRVP_Atabeya-2-AMLJHBDE_10160	SRVP_Atabeya-2_1016 # 961511 # 963196 # -1 # ID=1_1016;partial=00;start_type=ATG;rbs_motif=AGGA/GGAG/GAGG;rbs_spacer=11-12bp;gc_cont=0.485	SRVP_Atabeya-2_1016	SR-VP_11_27_2022_S1_100cm_MT	1	961511	963196	1686	11625022	0.051021	arCOG01257	GroEL	Chaperonin_GroEL,_HSP60_family	O	COG0459	Chaperonin_GroEL_(HSP60_family)	O	-
SRVP_Atabeya-2-AMLJHBDE_10190	SRVP_Atabeya-2_1019 # 965904 # 966197 # 1 # ID=1_1019;partial=00;start_type=ATG;rbs_motif=AGGAG/GGAGG;rbs_spacer=11-12bp;gc_cont=0.497	SRVP_Atabeya-2_1019	SR-VP_07_25_2022_A4_70cm_MT	1	965904	966197	294	19546	174.018	-	-	-	-	-	-	-	-
SRVP_Atabeya-2-AMLJHBDE_10270	SRVP_Atabeya-2_1027 # 975262 # 976767 # -1 # ID=1_1027;partial=00;start_type=ATG;rbs_motif=GGxGG;rbs_spacer=5-10bp;gc_cont=0.481	SRVP_Atabeya-2_1027	SR-VP_11_27_2022_S1_100cm_MT	1	975262	976767	1506	11625022	0.0571191	arCOG02013	DeoA	Thymidine_phosphorylase/AMP_phosphorylase	F	COG0213	Thymidine_phosphorylase	F	Pyrimidine_salvage
SRVP_Atabeya-2-AMLJHBDE_10290	SRVP_Atabeya-2_1029 # 977971 # 978444 # -1 # ID=1_1029;partial=00;start_type=GTG;rbs_motif=AGxAG;rbs_spacer=5-10bp;gc_cont=0.485	SRVP_Atabeya-2_1029	SR-VP_11_27_2022_S1_100cm_MT	2	977971	978444	474	11625022	0.362959	arCOG01759	-	Bifunctional_nuclease,_with_DNase_and_RNase_activity	L	COG1259	Bifunctional_DNase/RNase	R	-
SRVP_Atabeya-2-AMLJHBDE_10300	SRVP_Atabeya-2_1030 # 978602 # 980836 # -1 # ID=1_1030;partial=00;start_type=TTG;rbs_motif=GGA/GAG/AGG;rbs_spacer=11-12bp;gc_cont=0.480	SRVP_Atabeya-2_1030	SR-VP_11_27_2022_S1_100cm_MT	10	978602	980836	2235	11625022	0.384883	arCOG01308	Cdc48	ATPase_of_the_AAA+_class_,_CDC48_family	O	COG1222	ATP-dependent_26S_proteasome_regulatory_subunit	O	-
SRVP_Atabeya-2-AMLJHBDE_10330	SRVP_Atabeya-2_1033 # 982565 # 984016 # 1 # ID=1_1033;partial=00;start_type=TTG;rbs_motif=GGAG/GAGG;rbs_spacer=5-10bp;gc_cont=0.503	SRVP_Atabeya-2_1033	SR-VP_11_27_2022_S1_100cm_MT	2	982565	984016	1452	11625022	0.118487	arCOG04246	RtcB	RNA_3-P_ligase,_RtcB_family_protein	J	COG1690	RNA-splicing_ligase_RtcB,_repairs_tRNA_damage	J	-
SRVP_Atabeya-2-AMLJHBDE_10350	SRVP_Atabeya-2_1035 # 985225 # 987495 # -1 # ID=1_1035;partial=00;start_type=ATG;rbs_motif=AGGAG/GGAGG;rbs_spacer=11-12bp;gc_cont=0.481	SRVP_Atabeya-2_1035	SR-VP_11_27_2022_S1_100cm_MT	1	985225	987495	2271	11625022	0.0378782	arCOG04889	NrdD	Oxygen-sensitive_ribonucleoside-triphosphate_reductase	F	COG1328	Anaerobic_ribonucleoside-triphosphate_reductase	F	Thymidylate_biosynthesis
SRVP_Atabeya-2-AMLJHBDE_10410	SRVP_Atabeya-2_1041 # 991341 # 991973 # 1 # ID=1_1041;partial=00;start_type=ATG;rbs_motif=AGGAG;rbs_spacer=5-10bp;gc_cont=0.458	SRVP_Atabeya-2_1041	SR-VP_11_27_2022_S1_100cm_MT	19	991341	991973	633	11625022	2.582	-	-	-	-	-	-	-	-
SRVP_Atabeya-2-AMLJHBDE_10430	SRVP_Atabeya-2_1043 # 993064 # 993990 # 1 # ID=1_1043;partial=00;start_type=TTG;rbs_motif=GGA/GAG/AGG;rbs_spacer=5-10bp;gc_cont=0.467	SRVP_Atabeya-2_1043	SR-VP_07_25_2022_A1_70cm_MT	1	993064	993990	927	125142	8.6202	arCOG04263	-	Pantoate_kinase	H	COG1829	Archaeal_pantoate_kinase	H	Pantothenate/CoA_biosynthesis
SRVP_Atabeya-2-AMLJHBDE_10430	SRVP_Atabeya-2_1043 # 993064 # 993990 # 1 # ID=1_1043;partial=00;start_type=TTG;rbs_motif=GGA/GAG/AGG;rbs_spacer=5-10bp;gc_cont=0.467	SRVP_Atabeya-2_1043	SR-VP_11_27_2022_S1_100cm_MT	1	993064	993990	927	11625022	0.0927954	arCOG04263	-	Pantoate_kinase	H	COG1829	Archaeal_pantoate_kinase	H	Pantothenate/CoA_biosynthesis
SRVP_Atabeya-2-AMLJHBDE_10470	SRVP_Atabeya-2_1047 # 997228 # 998394 # 1 # ID=1_1047;partial=00;start_type=TTG;rbs_motif=AGGAG;rbs_spacer=5-10bp;gc_cont=0.476	SRVP_Atabeya-2_1047	SR-VP_11_27_2022_S1_100cm_MT	1	997228	998394	1167	11625022	0.0737115	arCOG00027	MfnA	L-tyrosine_decarboxylase,_PLP-dependent_protein	E	COG0076	Glutamate_or_tyrosine_decarboxylase_or_a_related_PLP-dependent_protein	E	Pantothenate/CoA_biosynthesis
SRVP_Atabeya-2-AMLJHBDE_10520	SRVP_Atabeya-2_1052 # 1000940 # 1001920 # -1 # ID=1_1052;partial=00;start_type=ATG;rbs_motif=GGA/GAG/AGG;rbs_spacer=3-4bp;gc_cont=0.482	SRVP_Atabeya-2_1052	SR-VP_11_27_2022_S1_100cm_MT	3	1000940	1001920	981	11625022	0.263062	arCOG00014	RbsK	Sugar_kinase,_ribokinase_family	G	COG0524	Sugar_or_nucleoside_kinase,_ribokinase_family	G	Glycolysis
SRVP_Atabeya-2-AMLJHBDE_10540	SRVP_Atabeya-2_1054 # 1002826 # 1003920 # -1 # ID=1_1054;partial=00;start_type=ATG;rbs_motif=GGA/GAG/AGG;rbs_spacer=5-10bp;gc_cont=0.477	SRVP_Atabeya-2_1054	SR-VP_11_27_2022_S1_100cm_MT	4	1002826	1003920	1095	11625022	0.314233	arCOG00057	GlmS	Glucosamine_6-phosphate_synthetase	M	COG0449	Glucosamine_6-phosphate_synthetase,_contains_amidotransferase_and_phosphosugar_isomerase_domains	M	-
SRVP_Atabeya-2-AMLJHBDE_10610	SRVP_Atabeya-2_1061 # 1008371 # 1009051 # 1 # ID=1_1061;partial=00;start_type=GTG;rbs_motif=AGGAG/GGAGG;rbs_spacer=11-12bp;gc_cont=0.507	SRVP_Atabeya-2_1061	SR-VP_11_27_2022_S1_100cm_MT	1	1008371	1009051	681	11625022	0.126316	-	-	-	-	-	-	-	-
SRVP_Atabeya-2-AMLJHBDE_10650	SRVP_Atabeya-2_1065 # 1010825 # 1011796 # 1 # ID=1_1065;partial=00;start_type=ATG;rbs_motif=AGGAGG;rbs_spacer=5-10bp;gc_cont=0.472	SRVP_Atabeya-2_1065	SR-VP_11_27_2022_S1_100cm_MT	2	1010825	1011796	972	11625022	0.176999	arCOG00422	GalT	Galactose-1-phosphate_uridylyltransferase	G	COG1085	Galactose-1-phosphate_uridylyltransferase	G	-
SRVP_Atabeya-2-AMLJHBDE_10850	SRVP_Atabeya-2_1085 # 1037112 # 1038101 # 1 # ID=1_1085;partial=00;start_type=ATG;rbs_motif=None;rbs_spacer=None;gc_cont=0.465	SRVP_Atabeya-2_1085	SR-VP_11_27_2022_S1_100cm_MT	7	1037112	1038101	990	11625022	0.608232	arCOG11424	-	Membrane_associated_protein_with_extracellular_Ig-like_domain,_a_component_of_a_putative_secretion_system	S	-	-	-	-
SRVP_Atabeya-2-AMLJHBDE_10860	SRVP_Atabeya-2_1086 # 1038289 # 1039662 # 1 # ID=1_1086;partial=00;start_type=ATG;rbs_motif=GGA/GAG/AGG;rbs_spacer=5-10bp;gc_cont=0.485	SRVP_Atabeya-2_1086	SR-VP_11_27_2022_S1_100cm_MT	1	1038289	1039662	1374	11625022	0.0626065	arCOG04269	NreA	DNA_repair_protein_NreA	L	COG1602	Archaeal_DNA_repair_protein_NreA	L	-
SRVP_Atabeya-2-AMLJHBDE_10880	SRVP_Atabeya-2_1088 # 1040419 # 1041498 # 1 # ID=1_1088;partial=00;start_type=ATG;rbs_motif=GGAG/GAGG;rbs_spacer=5-10bp;gc_cont=0.482	SRVP_Atabeya-2_1088	SR-VP_11_27_2022_S1_100cm_MT	6	1040419	1041498	1080	11625022	0.477896	arCOG04213	INO1	Myo-inositol-1-phosphate_synthase	I	COG1260	Myo-inositol-1-phosphate_synthase	I	-
SRVP_Atabeya-2-AMLJHBDE_10890	SRVP_Atabeya-2_1089 # 1041795 # 1042613 # 1 # ID=1_1089;partial=00;start_type=TTG;rbs_motif=GGAG/GAGG;rbs_spacer=5-10bp;gc_cont=0.448	SRVP_Atabeya-2_1089	SR-VP_11_27_2022_S1_100cm_MT	19	1041795	1042613	819	11625022	1.99561	arCOG10526	-	Membrane_associated_signal_transduction_histidine_kinase	T	-	-	-	-
SRVP_Atabeya-2-AMLJHBDE_10910	SRVP_Atabeya-2_1091 # 1043441 # 1043806 # -1 # ID=1_1091;partial=00;start_type=ATG;rbs_motif=None;rbs_spacer=None;gc_cont=0.448	SRVP_Atabeya-2_1091	SR-VP_11_27_2022_S1_100cm_MT	24	1043441	1043806	366	11625022	5.64074	arCOG03769	-	Uncharacterized_membrane_protein	S	-	-	-	-
SRVP_Atabeya-2-AMLJHBDE_11000	SRVP_Atabeya-2_1100 # 1052848 # 1055424 # -1 # ID=1_1100;partial=00;start_type=GTG;rbs_motif=None;rbs_spacer=None;gc_cont=0.468	SRVP_Atabeya-2_1100	SR-VP_11_27_2022_S1_100cm_MT	23	1052848	1055424	2577	11625022	0.76775	arCOG02044	AglB	Oligosaccharyltransferase_membrane_subunit	M	COG1287	Asparagine_N-glycosylation_enzyme,_membrane_subunit_Stt3	O	-
SRVP_Atabeya-2-AMLJHBDE_11130	SRVP_Atabeya-2_1113 # 1068393 # 1069100 # -1 # ID=1_1113;partial=00;start_type=ATG;rbs_motif=GGA/GAG/AGG;rbs_spacer=5-10bp;gc_cont=0.424	SRVP_Atabeya-2_1113	SR-VP_11_27_2022_S1_100cm_MT	4	1068393	1069100	708	11625022	0.485996	-	-	-	-	-	-	-	-
SRVP_Atabeya-2-AMLJHBDE_11170	SRVP_Atabeya-2_1117 # 1072880 # 1073608 # 1 # ID=1_1117;partial=00;start_type=ATG;rbs_motif=GGA/GAG/AGG;rbs_spacer=5-10bp;gc_cont=0.453	SRVP_Atabeya-2_1117	SR-VP_11_27_2022_S1_100cm_MT	28	1072880	1073608	729	11625022	3.30397	arCOG01171	KaiC	KaiC_family_ATPase_implicated_in_signal_transduction	T	COG0467	RecA-superfamily_ATPase,_KaiC/GvpD/RAD55_family	T	-
SRVP_Atabeya-2-AMLJHBDE_11180	SRVP_Atabeya-2_1118 # 1073695 # 1074747 # -1 # ID=1_1118;partial=00;start_type=TTG;rbs_motif=AGGAGG;rbs_spacer=5-10bp;gc_cont=0.462	SRVP_Atabeya-2_1118	SR-VP_11_27_2022_S1_100cm_MT	20	1073695	1074747	1053	11625022	1.63383	arCOG03045	-	TPR_repeats_containing_protein,_fused_to_putative_immunity_protein,_associated_with_polymorphic_toxin_loci	V	COG3903	Predicted_ATPase	R	-
SRVP_Atabeya-2-AMLJHBDE_11190	SRVP_Atabeya-2_1119 # 1074880 # 1076550 # 1 # ID=1_1119;partial=00;start_type=TTG;rbs_motif=AGGAGG;rbs_spacer=5-10bp;gc_cont=0.460	SRVP_Atabeya-2_1119	SR-VP_11_27_2022_S1_100cm_MT	13	1074880	1076550	1671	11625022	0.669226	arCOG00856	CaiC	Acyl-CoA_synthetase_(AMP-forming)/AMP-acid_ligase_II	I	COG0365	Acyl-coenzyme_A_synthetase/AMP-(fatty)_acid_ligase	I	-
SRVP_Atabeya-2-AMLJHBDE_11240	SRVP_Atabeya-2_1124 # 1080401 # 1081075 # 1 # ID=1_1124;partial=00;start_type=TTG;rbs_motif=GGAG/GAGG;rbs_spacer=5-10bp;gc_cont=0.456	SRVP_Atabeya-2_1124	SR-VP_11_27_2022_S1_100cm_MT	2	1080401	1081075	675	11625022	0.254878	-	-	-	-	-	-	-	-
SRVP_Atabeya-2-AMLJHBDE_11390	SRVP_Atabeya-2_1139 # 1096495 # 1097613 # -1 # ID=1_1139;partial=00;start_type=TTG;rbs_motif=GGA/GAG/AGG;rbs_spacer=11-12bp;gc_cont=0.488	SRVP_Atabeya-2_1139	SR-VP_11_27_2022_S1_100cm_MT	11	1096495	1097613	1119	11625022	0.845607	-	-	-	-	COG0846	NAD-dependent_protein_deacetylase,_SIR2_family	O	-
SRVP_Atabeya-2-AMLJHBDE_11500	SRVP_Atabeya-2_1150 # 1115344 # 1115772 # 1 # ID=1_1150;partial=00;start_type=TTG;rbs_motif=GGAGG;rbs_spacer=5-10bp;gc_cont=0.445	SRVP_Atabeya-2_1150	SR-VP_11_27_2022_S1_100cm_MT	1	1115344	1115772	429	11625022	0.200516	arCOG07647	-	Uncharacterized_protein	S	-	-	-	-
SRVP_Atabeya-2-AMLJHBDE_11520	SRVP_Atabeya-2_1152 # 1117415 # 1118662 # 1 # ID=1_1152;partial=00;start_type=ATG;rbs_motif=GGA/GAG/AGG;rbs_spacer=5-10bp;gc_cont=0.439	SRVP_Atabeya-2_1152	SR-VP_11_27_2022_S1_100cm_MT	10	1117415	1118662	1248	11625022	0.689274	arCOG01897	IolE	Sugar_phosphate_isomerase/epimerase	G	COG1531	Uncharacterized_conserved_protein,_UPF0248_family	S	-
SRVP_Atabeya-2-AMLJHBDE_11530	SRVP_Atabeya-2_1153 # 1118716 # 1119096 # -1 # ID=1_1153;partial=00;start_type=ATG;rbs_motif=GGA/GAG/AGG;rbs_spacer=11-12bp;gc_cont=0.470	SRVP_Atabeya-2_1153	SR-VP_11_27_2022_S1_100cm_MT	4	1118716	1119096	381	11625022	0.903111	-	-	-	-	COG3255	Putative_sterol_carrier_protein,_contains_SCP2_domain	I	-
SRVP_Atabeya-2-AMLJHBDE_11570	SRVP_Atabeya-2_1157 # 1120812 # 1121087 # 1 # ID=1_1157;partial=00;start_type=TTG;rbs_motif=GGAG/GAGG;rbs_spacer=5-10bp;gc_cont=0.424	SRVP_Atabeya-2_1157	SR-VP_11_27_2022_S1_100cm_MT	35	1120812	1121087	276	11625022	10.9085	-	-	-	-	-	-	-	-
SRVP_Atabeya-2-AMLJHBDE_11580	SRVP_Atabeya-2_1158 # 1121257 # 1122321 # 1 # ID=1_1158;partial=00;start_type=ATG;rbs_motif=None;rbs_spacer=None;gc_cont=0.472	SRVP_Atabeya-2_1158	SR-VP_07_25_2022_A1_70cm_MT	1	1121257	1122321	1065	125142	7.50321	arCOG03323	MtbA	Methylcobalamin:coenzyme_M_methyltransferase	H	COG0407	Uroporphyrinogen-III_decarboxylase_HemE	H	Heme_biosynthesis
SRVP_Atabeya-2-AMLJHBDE_11590	SRVP_Atabeya-2_1159 # 1122464 # 1122805 # 1 # ID=1_1159;partial=00;start_type=ATG;rbs_motif=GGAG/GAGG;rbs_spacer=5-10bp;gc_cont=0.468	SRVP_Atabeya-2_1159	SR-VP_11_27_2022_S1_40cm_MT	1	1122464	1122805	342	1473124	1.98488	arCOG05582	-	Uncharacterized_protein	S	-	-	-	-
SRVP_Atabeya-2-AMLJHBDE_11750	SRVP_Atabeya-2_1175 # 1134712 # 1135638 # -1 # ID=1_1175;partial=00;start_type=GTG;rbs_motif=GGAG/GAGG;rbs_spacer=5-10bp;gc_cont=0.454	SRVP_Atabeya-2_1175	SR-VP_11_27_2022_S1_100cm_MT	1	1134712	1135638	927	11625022	0.0927954	arCOG00196	CcmA	ABC-type_multidrug_transport_system,_ATPase_component	V	COG4152	ABC-type_uncharacterized_transport_system,_ATPase_component	R	-
SRVP_Atabeya-2-AMLJHBDE_11790	SRVP_Atabeya-2_1179 # 1138829 # 1139623 # 1 # ID=1_1179;partial=00;start_type=TTG;rbs_motif=AGGAG/GGAGG;rbs_spacer=11-12bp;gc_cont=0.478	SRVP_Atabeya-2_1179	SR-VP_11_27_2022_S1_100cm_MT	7	1138829	1139623	795	11625022	0.757421	arCOG00249	FadB	3-hydroxyacyl-CoA_dehydrogenase,_some_fused_to_Enoyl-CoA_hydratase	I	COG1024	Enoyl-CoA_hydratase/carnithine_racemase	I	Fatty_acid_biosynthesis
SRVP_Atabeya-2-AMLJHBDE_11860	SRVP_Atabeya-2_1186 # 1145593 # 1147086 # 1 # ID=1_1186;partial=00;start_type=ATG;rbs_motif=AGGA/GGAG/GAGG;rbs_spacer=11-12bp;gc_cont=0.492	SRVP_Atabeya-2_1186	SR-VP_11_27_2022_S1_100cm_MT	6	1145593	1147086	1494	11625022	0.345467	arCOG04172	DapA	Dihydrodipicolinate_synthase/N-acetylneuraminate_lyase	E	COG0329	4-hydroxy-tetrahydrodipicolinate_synthase/N-acetylneuraminate_lyase	EM	Lysine_biosynthesis
SRVP_Atabeya-2-AMLJHBDE_11880	SRVP_Atabeya-2_1188 # 1147710 # 1149113 # -1 # ID=1_1188;partial=00;start_type=ATG;rbs_motif=AGGA/GGAG/GAGG;rbs_spacer=11-12bp;gc_cont=0.484	SRVP_Atabeya-2_1188	SR-VP_11_27_2022_S1_100cm_MT	6	1147710	1149113	1404	11625022	0.367613	arCOG04170	GckA	Glycerate_kinase	G	COG2379	Glycerate-2-kinase	G	Non-phosphorylated_Entner-Doudoroff_pathway
SRVP_Atabeya-2-AMLJHBDE_11890	SRVP_Atabeya-2_1189 # 1149237 # 1150526 # -1 # ID=1_1189;partial=00;start_type=ATG;rbs_motif=AGGAG(G)/GGAGG;rbs_spacer=13-15bp;gc_cont=0.460	SRVP_Atabeya-2_1189	SR-VP_11_27_2022_S1_100cm_MT	4	1149237	1150526	1290	11625022	0.266733	arCOG01696	ApgM	2,3-bisphosphoglycerate-independent_phosphoglycerate_mutase	G	COG3635	2,3-bisphosphoglycerate-independent_phosphoglycerate_mutase,_archeal_type	G	Glycolysis
SRVP_Atabeya-2-AMLJHBDE_11900	SRVP_Atabeya-2_1190 # 1150679 # 1152001 # -1 # ID=1_1190;partial=00;start_type=ATG;rbs_motif=GGAGG;rbs_spacer=5-10bp;gc_cont=0.444	SRVP_Atabeya-2_1190	SR-VP_11_27_2022_S1_100cm_MT	3	1150679	1152001	1323	11625022	0.19506	arCOG02037	-	Sugar-specific_transcriptional_regulator_TrmB	K	COG1378	Sugar-specific_transcriptional_regulator_TrmB	K	-
SRVP_Atabeya-2-AMLJHBDE_11930	SRVP_Atabeya-2_1193 # 1153627 # 1154526 # -1 # ID=1_1193;partial=00;start_type=TTG;rbs_motif=GGA/GAG/AGG;rbs_spacer=5-10bp;gc_cont=0.452	SRVP_Atabeya-2_1193	SR-VP_11_27_2022_S1_100cm_MT	4	1153627	1154526	900	11625022	0.382317	arCOG00250	FadB	3-hydroxyacyl-CoA_dehydrogenase	I	COG1250	3-hydroxyacyl-CoA_dehydrogenase	I	Fatty_acid_biosynthesis
SRVP_Atabeya-2-AMLJHBDE_11960	SRVP_Atabeya-2_1196 # 1156861 # 1158363 # 1 # ID=1_1196;partial=00;start_type=ATG;rbs_motif=None;rbs_spacer=None;gc_cont=0.469	SRVP_Atabeya-2_1196	SR-VP_11_27_2022_S1_100cm_MT	1	1156861	1158363	1503	11625022	0.0572331	arCOG01434	-	Cysteate_synthase	H	COG0498	Threonine_synthase	E	Threonine_biosynthesis
SRVP_Atabeya-2-AMLJHBDE_12010	SRVP_Atabeya-2_1201 # 1162420 # 1162863 # 1 # ID=1_1201;partial=00;start_type=ATG;rbs_motif=GGxGG;rbs_spacer=5-10bp;gc_cont=0.480	SRVP_Atabeya-2_1201	SR-VP_11_27_2022_S1_100cm_MT	1	1162420	1162863	444	11625022	0.193742	arCOG02053	UspA	Nucleotide-binding_protein,__UspA_family	T	COG0589	Nucleotide-binding_universal_stress_protein,__UspA_family	T	-
SRVP_Atabeya-2-AMLJHBDE_12050	SRVP_Atabeya-2_1205 # 1164569 # 1165444 # 1 # ID=1_1205;partial=00;start_type=ATG;rbs_motif=GGA/GAG/AGG;rbs_spacer=5-10bp;gc_cont=0.483	SRVP_Atabeya-2_1205	SR-VP_11_27_2022_S1_100cm_MT	1	1164569	1165444	876	11625022	0.0981979	arCOG01648	MhpC	Alpha/beta_superfamily_hydrolase	R	COG0596	2-succinyl-6-hydroxy-2,4-cyclohexadiene-1-carboxylate_synthase_MenH_and_related_esterases,_alpha/beta_hydrolase_fold	HR	Menaquinone_biosynthesis
SRVP_Atabeya-2-AMLJHBDE_12090	SRVP_Atabeya-2_1209 # 1168877 # 1170094 # -1 # ID=1_1209;partial=00;start_type=ATG;rbs_motif=GGA/GAG/AGG;rbs_spacer=3-4bp;gc_cont=0.456	SRVP_Atabeya-2_1209	SR-VP_11_27_2022_S1_100cm_MT	3	1168877	1170094	1218	11625022	0.211875	-	-	-	-	-	-	-	-
SRVP_Atabeya-2-AMLJHBDE_12110	SRVP_Atabeya-2_1211 # 1172856 # 1174169 # 1 # ID=1_1211;partial=00;start_type=GTG;rbs_motif=GGA/GAG/AGG;rbs_spacer=11-12bp;gc_cont=0.473	SRVP_Atabeya-2_1211	SR-VP_11_27_2022_S1_100cm_MT	2	1172856	1174169	1314	11625022	0.130931	arCOG01029	GalK	Galactokinase	G	COG0153	Galactokinase	G	-
SRVP_Atabeya-2-AMLJHBDE_12120	SRVP_Atabeya-2_1212 # 1174444 # 1174638 # -1 # ID=1_1212;partial=00;start_type=TTG;rbs_motif=GGA/GAG/AGG;rbs_spacer=5-10bp;gc_cont=0.508	SRVP_Atabeya-2_1212	SR-VP_11_27_2022_S1_100cm_MT	11	1174444	1174638	195	11625022	4.85249	-	-	-	-	-	-	-	-
SRVP_Atabeya-2-AMLJHBDE_12130	SRVP_Atabeya-2_1213 # 1174834 # 1177164 # 1 # ID=1_1213;partial=00;start_type=ATG;rbs_motif=3Base/5BMM;rbs_spacer=13-15bp;gc_cont=0.489	SRVP_Atabeya-2_1213	SR-VP_11_27_2022_S1_100cm_MT	17	1174834	1177164	2331	11625022	0.627354	arCOG11399	-	Metacaspase_family_peptidase	V	COG4249	Uncharacterized_conserved_protein,_contains_caspase_domain	R	-
SRVP_Atabeya-2-AMLJHBDE_12160	SRVP_Atabeya-2_1216 # 1177748 # 1179001 # 1 # ID=1_1216;partial=00;start_type=GTG;rbs_motif=GGxGG;rbs_spacer=5-10bp;gc_cont=0.541	SRVP_Atabeya-2_1216	SR-VP_11_27_2022_S1_100cm_MT	1	1177748	1179001	1254	11625022	0.0685976	arCOG02559	-	Cell_surface_protein	M	-	-	-	-
SRVP_Atabeya-2-AMLJHBDE_12260	SRVP_Atabeya-2_1226 # 1192012 # 1193865 # -1 # ID=1_1226;partial=00;start_type=TTG;rbs_motif=AGGAGG;rbs_spacer=5-10bp;gc_cont=0.474	SRVP_Atabeya-2_1226	SR-VP_11_27_2022_S1_100cm_MT	24	1192012	1193865	1854	11625022	1.11354	arCOG02785	-	Arylsulfatase_A_or_related_enzyme	P	COG1524	c-di-AMP_phosphodiesterase_AtaC_or_nucleotide_pyrophosphatase,_AlkP_superfamily	T	-
SRVP_Atabeya-2-AMLJHBDE_12280	SRVP_Atabeya-2_1228 # 1195245 # 1198595 # 1 # ID=1_1228;partial=00;start_type=ATG;rbs_motif=GGAG/GAGG;rbs_spacer=5-10bp;gc_cont=0.465	SRVP_Atabeya-2_1228	SR-VP_11_27_2022_S1_100cm_MT	11	1195245	1198595	3351	11625022	0.282374	arCOG04276	NrdA	Ribonucleotide_reductase,_alpha_subunit	F	COG0209	Ribonucleotide_reductase_alpha_subunit	F	Pyrimidine_salvage
SRVP_Atabeya-2-AMLJHBDE_12340	SRVP_Atabeya-2_1234 # 1204470 # 1205681 # 1 # ID=1_1234;partial=00;start_type=TTG;rbs_motif=4Base/6BMM;rbs_spacer=13-15bp;gc_cont=0.475	SRVP_Atabeya-2_1234	SR-VP_11_27_2022_S1_100cm_MT	3	1204470	1205681	1212	11625022	0.212924	arCOG03323	MtbA	Methylcobalamin:coenzyme_M_methyltransferase	H	COG0407	Uroporphyrinogen-III_decarboxylase_HemE	H	Heme_biosynthesis
SRVP_Atabeya-2-AMLJHBDE_12410	SRVP_Atabeya-2_1241 # 1212418 # 1213176 # 1 # ID=1_1241;partial=00;start_type=TTG;rbs_motif=AGGAGG;rbs_spacer=11-12bp;gc_cont=0.480	SRVP_Atabeya-2_1241	SR-VP_11_27_2022_S1_100cm_MT	2	1212418	1213176	759	11625022	0.22667	-	-	-	-	-	-	-	-
SRVP_Atabeya-2-AMLJHBDE_12570	SRVP_Atabeya-2_1257 # 1229402 # 1230166 # -1 # ID=1_1257;partial=00;start_type=ATG;rbs_motif=4Base/6BMM;rbs_spacer=13-15bp;gc_cont=0.475	SRVP_Atabeya-2_1257	SR-VP_11_27_2022_S1_100cm_MT	1	1229402	1230166	765	11625022	0.112446	arCOG01648	MhpC	Alpha/beta_superfamily_hydrolase	R	COG0596	2-succinyl-6-hydroxy-2,4-cyclohexadiene-1-carboxylate_synthase_MenH_and_related_esterases,_alpha/beta_hydrolase_fold	HR	Menaquinone_biosynthesis
SRVP_Atabeya-2-AMLJHBDE_12610	SRVP_Atabeya-2_1261 # 1232812 # 1233576 # -1 # ID=1_1261;partial=00;start_type=ATG;rbs_motif=GGAG/GAGG;rbs_spacer=5-10bp;gc_cont=0.480	SRVP_Atabeya-2_1261	SR-VP_11_27_2022_S1_100cm_MT	13	1232812	1233576	765	11625022	1.4618	-	-	-	-	-	-	-	-
SRVP_Atabeya-2-AMLJHBDE_12700	SRVP_Atabeya-2_1270 # 1243103 # 1244977 # -1 # ID=1_1270;partial=00;start_type=ATG;rbs_motif=None;rbs_spacer=None;gc_cont=0.471	SRVP_Atabeya-2_1270	SR-VP_11_27_2022_S1_100cm_MT	2	1243103	1244977	1875	11625022	0.0917561	arCOG01609	-	Indolepyruvate_ferredoxin_oxidoreductase,_alpha_and_beta_subunit	C	COG0674	Pyruvate:ferredoxin_oxidoreductase_or_related_2-oxoacid:ferredoxin_oxidoreductase,_alpha_subunit	C	Pyruvate_oxidation
SRVP_Atabeya-2-AMLJHBDE_12730	SRVP_Atabeya-2_1273 # 1246717 # 1247250 # -1 # ID=1_1273;partial=00;start_type=TTG;rbs_motif=AGGA/GGAG/GAGG;rbs_spacer=11-12bp;gc_cont=0.449	SRVP_Atabeya-2_1273	SR-VP_11_27_2022_S1_100cm_MT	2	1246717	1247250	534	11625022	0.322177	arCOG02291	-	HAD_superfamily_hydrolase	R	COG1011	FMN_and_5-amino-6-(5-phospho-D-ribitylamino)uracil_phosphatase_YigB,_HAD_superfamily_(riboflavin_biosynthesis)	H	-
SRVP_Atabeya-2-AMLJHBDE_12860	SRVP_Atabeya-2_1286 # 1255918 # 1258176 # 1 # ID=1_1286;partial=00;start_type=ATG;rbs_motif=None;rbs_spacer=None;gc_cont=0.469	SRVP_Atabeya-2_1286	SR-VP_11_27_2022_S1_100cm_MT	4	1255918	1258176	2259	11625022	0.152318	arCOG01576	ZntA	Cation_transport_ATPase	P	COG0474	Magnesium-transporting_ATPase_(P-type)	P	-
SRVP_Atabeya-2-AMLJHBDE_12870	SRVP_Atabeya-2_1287 # 1258378 # 1260873 # -1 # ID=1_1287;partial=00;start_type=ATG;rbs_motif=GGAG/GAGG;rbs_spacer=5-10bp;gc_cont=0.467	SRVP_Atabeya-2_1287	SR-VP_11_27_2022_S2_40cm_MT	1	1258378	1260873	2496	4025082	0.0995361	arCOG01576	ZntA	Cation_transport_ATPase	P	COG0474	Magnesium-transporting_ATPase_(P-type)	P	-
SRVP_Atabeya-2-AMLJHBDE_12950	SRVP_Atabeya-2_1295 # 1268974 # 1270581 # 1 # ID=1_1295;partial=00;start_type=ATG;rbs_motif=AGGAGG;rbs_spacer=11-12bp;gc_cont=0.491	SRVP_Atabeya-2_1295	SR-VP_11_27_2022_S1_100cm_MT	3	1268974	1270581	1608	11625022	0.160488	arCOG00619	GltB	Glutamate_synthase_domain_2_and_ferredoxin_domain	E	COG0069	Glutamate_synthase_domain_2	E	Glutamine_biosynthesis
SRVP_Atabeya-2-AMLJHBDE_12980	SRVP_Atabeya-2_1298 # 1271488 # 1272744 # -1 # ID=1_1298;partial=00;start_type=TTG;rbs_motif=AGGAGG;rbs_spacer=5-10bp;gc_cont=0.461	SRVP_Atabeya-2_1298	SR-VP_11_27_2022_S1_100cm_MT	1	1271488	1272744	1257	11625022	0.0684338	arCOG01352	GdhA	Glutamate_dehydrogenase/leucine_dehydrogenase	E	COG0334	Glutamate_dehydrogenase/leucine_dehydrogenase	E	Glutamine_biosynthesis
SRVP_Atabeya-2-AMLJHBDE_13020	SRVP_Atabeya-2_1302 # 1275652 # 1276668 # 1 # ID=1_1302;partial=00;start_type=ATG;rbs_motif=AGGAG(G)/GGAGG;rbs_spacer=13-15bp;gc_cont=0.475	SRVP_Atabeya-2_1302	SR-VP_11_27_2022_S1_100cm_MT	11	1275652	1276668	1017	11625022	0.930418	arCOG06125	-	Uncharacterized_protein	S	COG3246	Uncharacterized_conserved_protein,_DUF849_family	S	-
SRVP_Atabeya-2-AMLJHBDE_13030	SRVP_Atabeya-2_1303 # 1276921 # 1277745 # 1 # ID=1_1303;partial=00;start_type=ATG;rbs_motif=AGxAGG/AGGxGG;rbs_spacer=11-12bp;gc_cont=0.480	SRVP_Atabeya-2_1303	SR-VP_07_25_2022_A1_70cm_MT	1	1276921	1277745	825	125142	9.68597	arCOG01290	SplB	DNA_repair_photolyase	L	COG1533	DNA_repair_photolyase	L	-
SRVP_Atabeya-2-AMLJHBDE_13110	SRVP_Atabeya-2_1311 # 1285466 # 1288324 # 1 # ID=1_1311;partial=00;start_type=ATG;rbs_motif=AGGAG;rbs_spacer=5-10bp;gc_cont=0.462	SRVP_Atabeya-2_1311	SR-VP_11_27_2022_S1_100cm_MT	9	1285466	1288324	2859	11625022	0.270791	arCOG03838	PqqD	Coenzyme_PQQ_synthesis_protein_D	H	COG1994	Zn-dependent_protease_(includes_sporulation_protein_SpoIVFB)	O	-
SRVP_Atabeya-2-AMLJHBDE_13120	SRVP_Atabeya-2_1312 # 1288405 # 1289937 # -1 # ID=1_1312;partial=00;start_type=ATG;rbs_motif=AGGAG(G)/GGAGG;rbs_spacer=13-15bp;gc_cont=0.461	SRVP_Atabeya-2_1312	SR-VP_11_27_2022_S1_100cm_MT	5	1288405	1289937	1533	11625022	0.280565	arCOG00025	XylB	Sugar_(pentulose_and_hexulose)_kinase	G	COG1070	Sugar_(pentulose_or_hexulose)_kinase	G	Non-phosphorylated_Entner-Doudoroff_pathway
SRVP_Atabeya-2-AMLJHBDE_13130	SRVP_Atabeya-2_1313 # 1289947 # 1291044 # -1 # ID=1_1313;partial=00;start_type=ATG;rbs_motif=4Base/6BMM;rbs_spacer=13-15bp;gc_cont=0.468	SRVP_Atabeya-2_1313	SR-VP_11_27_2022_S1_100cm_MT	1	1289947	1291044	1098	11625022	0.0783437	arCOG04273	HisC	Histidinol-phosphate/aromatic_aminotransferase_or_cobyric_acid_decarboxylase	E	COG0079	Histidinol-phosphate/aromatic_aminotransferase_or_cobyric_acid_decarboxylase	E	Cobalamine/B12_biosynthesis
SRVP_Atabeya-2-AMLJHBDE_13170	SRVP_Atabeya-2_1317 # 1296012 # 1297505 # 1 # ID=1_1317;partial=00;start_type=TTG;rbs_motif=AGGAGG;rbs_spacer=11-12bp;gc_cont=0.500	SRVP_Atabeya-2_1317	SR-VP_11_27_2022_S1_100cm_MT	1	1296012	1297505	1494	11625022	0.0575779	arCOG00340	GlcD	FAD/FMN-containing_dehydrogenase_fused_to_Heterodisulfide_reductase,_subunit_B	C	COG0277	FAD/FMN-containing_lactate_dehydrogenase/glycolate_oxidase	C	-
SRVP_Atabeya-2-AMLJHBDE_13180	SRVP_Atabeya-2_1318 # 1297530 # 1298759 # 1 # ID=1_1318;partial=00;start_type=ATG;rbs_motif=AGGAGG;rbs_spacer=5-10bp;gc_cont=0.498	SRVP_Atabeya-2_1318	SR-VP_11_27_2022_S1_100cm_MT	5	1297530	1298759	1230	11625022	0.34968	arCOG00963	GlpC	Succinate_dehydrogenase/fumarate_reductase,_Fe-S_protein_subunit	C	COG2048	Heterodisulfide_reductase,_subunit_B	C	-
SRVP_Atabeya-2-AMLJHBDE_13190	SRVP_Atabeya-2_1319 # 1298944 # 1299270 # -1 # ID=1_1319;partial=00;start_type=GTG;rbs_motif=AGxAGG/AGGxGG;rbs_spacer=5-10bp;gc_cont=0.443	SRVP_Atabeya-2_1319	SR-VP_11_27_2022_S1_100cm_MT	4	1298944	1299270	327	11625022	1.05225	-	-	-	-	-	-	-	-
SRVP_Atabeya-2-AMLJHBDE_13200	SRVP_Atabeya-2_1320 # 1299626 # 1300513 # 1 # ID=1_1320;partial=00;start_type=TTG;rbs_motif=AGGA/GGAG/GAGG;rbs_spacer=11-12bp;gc_cont=0.466	SRVP_Atabeya-2_1320	SR-VP_11_27_2022_S1_100cm_MT	1	1299626	1300513	888	11625022	0.0968709	arCOG01875	-	ParB-like_nuclease_domain	K	COG1475	Chromosome_segregation_protein_Spo0J,_contains_ParB-like_nuclease_domain	D	-
SRVP_Atabeya-2-AMLJHBDE_13210	SRVP_Atabeya-2_1321 # 1300556 # 1301224 # -1 # ID=1_1321;partial=00;start_type=ATG;rbs_motif=AGGAG/GGAGG;rbs_spacer=11-12bp;gc_cont=0.460	SRVP_Atabeya-2_1321	SR-VP_07_25_2022_A1_70cm_MT	3	1300556	1301224	669	125142	35.8337	arCOG05343	-	GTPase_SAR1_or_related_small_G_protein	R	COG1100	GTPase_SAR1_family_domain	R	-
SRVP_Atabeya-2-AMLJHBDE_13210	SRVP_Atabeya-2_1321 # 1300556 # 1301224 # -1 # ID=1_1321;partial=00;start_type=ATG;rbs_motif=AGGAG/GGAGG;rbs_spacer=11-12bp;gc_cont=0.460	SRVP_Atabeya-2_1321	SR-VP_11_27_2022_S1_100cm_MT	1	1300556	1301224	669	11625022	0.128582	arCOG05343	-	GTPase_SAR1_or_related_small_G_protein	R	COG1100	GTPase_SAR1_family_domain	R	-
SRVP_Atabeya-2-AMLJHBDE_13220	SRVP_Atabeya-2_1322 # 1301488 # 1302477 # 1 # ID=1_1322;partial=00;start_type=ATG;rbs_motif=GGA/GAG/AGG;rbs_spacer=11-12bp;gc_cont=0.485	SRVP_Atabeya-2_1322	SR-VP_11_27_2022_S1_100cm_MT	4	1301488	1302477	990	11625022	0.347561	arCOG01755	LdhA	Lactate_dehydrogenase_or_related_2-hydroxyacid_dehydrogenase	C	COG1052	Lactate_dehydrogenase_or_related_2-hydroxyacid_dehydrogenase	CHR	Pyridoxal_phosphate_biosynthesis
SRVP_Atabeya-2-AMLJHBDE_13230	SRVP_Atabeya-2_1323 # 1302927 # 1303769 # -1 # ID=1_1323;partial=00;start_type=ATG;rbs_motif=GGAGG;rbs_spacer=5-10bp;gc_cont=0.448	SRVP_Atabeya-2_1323	SR-VP_11_27_2022_S1_100cm_MT	1	1302927	1303769	843	11625022	0.102042	-	-	-	-	-	-	-	-
SRVP_Atabeya-2-AMLJHBDE_13280	SRVP_Atabeya-2_1328 # 1307788 # 1308825 # 1 # ID=1_1328;partial=00;start_type=ATG;rbs_motif=GGA/GAG/AGG;rbs_spacer=5-10bp;gc_cont=0.469	SRVP_Atabeya-2_1328	SR-VP_11_27_2022_S1_100cm_MT	2	1307788	1308825	1038	11625022	0.165744	arCOG04044	-	2-amino-3,7-dideoxy-D-threo-hept-6-ulosonic_acid_synthase,_DhnA-aldolase_family	E	COG1830	Fructose-bisphosphate_aldolase_class_Ia,_DhnA_family	G	Glycolysis
SRVP_Atabeya-2-AMLJHBDE_13290	SRVP_Atabeya-2_1329 # 1308877 # 1310106 # 1 # ID=1_1329;partial=00;start_type=ATG;rbs_motif=GGAG/GAGG;rbs_spacer=5-10bp;gc_cont=0.473	SRVP_Atabeya-2_1329	SR-VP_11_27_2022_S1_100cm_MT	1	1308877	1310106	1230	11625022	0.0699361	arCOG03640	PfkA	6-phosphofructokinase	G	COG0205	6-phosphofructokinase	G	Glycolysis
SRVP_Atabeya-2-AMLJHBDE_13300	SRVP_Atabeya-2_1330 # 1310165 # 1310827 # 1 # ID=1_1330;partial=00;start_type=ATG;rbs_motif=AGGAGG;rbs_spacer=11-12bp;gc_cont=0.448	SRVP_Atabeya-2_1330	SR-VP_11_27_2022_S1_100cm_MT	10	1310165	1310827	663	11625022	1.29746	arCOG02008	-	Uncharacterized_membrane_protein,_a_putative_transporter_component	R	COG3371	Uncharacterized_membrane_protein	S	-
SRVP_Atabeya-2-AMLJHBDE_13310	SRVP_Atabeya-2_1331 # 1310900 # 1311514 # 1 # ID=1_1331;partial=00;start_type=ATG;rbs_motif=AGGAGG;rbs_spacer=11-12bp;gc_cont=0.460	SRVP_Atabeya-2_1331	SR-VP_11_27_2022_S1_100cm_MT	16	1310900	1311514	615	11625022	2.23795	arCOG02008	-	Uncharacterized_membrane_protein,_a_putative_transporter_component	R	COG3371	Uncharacterized_membrane_protein	S	-
SRVP_Atabeya-2-AMLJHBDE_13340	SRVP_Atabeya-2_1334 # 1313940 # 1314227 # 1 # ID=1_1334;partial=00;start_type=GTG;rbs_motif=GGxGG;rbs_spacer=11-12bp;gc_cont=0.458	SRVP_Atabeya-2_1334	SR-VP_11_27_2022_S1_100cm_MT	4	1313940	1314227	288	11625022	1.19474	arCOG05336	HimA	Bacterial_nucleoid_DNA-binding_protein	L	COG0776	Bacterial_nucleoid_DNA-binding_protein_IHF-alpha	L	-
SRVP_Atabeya-2-AMLJHBDE_13350	SRVP_Atabeya-2_1335 # 1314298 # 1314795 # -1 # ID=1_1335;partial=00;start_type=ATG;rbs_motif=None;rbs_spacer=None;gc_cont=0.432	SRVP_Atabeya-2_1335	SR-VP_11_27_2022_S1_100cm_MT	3	1314298	1314795	498	11625022	0.518201	arCOG04046	-	Predicted_phosphatase	R	COG4996	Predicted_phosphatase	R	-
SRVP_Atabeya-2-AMLJHBDE_13390	SRVP_Atabeya-2_1339 # 1319976 # 1321052 # -1 # ID=1_1339;partial=00;start_type=ATG;rbs_motif=GGxGG;rbs_spacer=3-4bp;gc_cont=0.452	SRVP_Atabeya-2_1339	SR-VP_11_27_2022_S1_100cm_MT	1	1319976	1321052	1077	11625022	0.0798713	-	-	-	-	-	-	-	-
SRVP_Atabeya-2-AMLJHBDE_13420	SRVP_Atabeya-2_1342 # 1323211 # 1325076 # -1 # ID=1_1342;partial=00;start_type=ATG;rbs_motif=AGGA/GGAG/GAGG;rbs_spacer=11-12bp;gc_cont=0.498	SRVP_Atabeya-2_1342	SR-VP_11_27_2022_S1_100cm_MT	3	1323211	1325076	1866	11625022	0.138298	arCOG00706	gor	Aldehyde:ferredoxin_oxidoreductase	C	COG2414	Aldehyde:ferredoxin_oxidoreductase	C	-
SRVP_Atabeya-2-AMLJHBDE_13460	SRVP_Atabeya-2_1346 # 1327711 # 1328859 # 1 # ID=1_1346;partial=00;start_type=ATG;rbs_motif=GGAG/GAGG;rbs_spacer=5-10bp;gc_cont=0.500	SRVP_Atabeya-2_1346	SR-VP_11_27_2022_S1_100cm_MT	5	1327711	1328859	1149	11625022	0.374331	arCOG06880	DnaJ	DnaJ_type_Zn_finger_domain	O	COG0484	DnaJ-class_molecular_chaperone_with_C-terminal_Zn_finger_domain	O	-
SRVP_Atabeya-2-AMLJHBDE_13480	SRVP_Atabeya-2_1348 # 1330919 # 1333642 # 1 # ID=1_1348;partial=00;start_type=ATG;rbs_motif=AGxAGG/AGGxGG;rbs_spacer=5-10bp;gc_cont=0.476	SRVP_Atabeya-2_1348	SR-VP_11_27_2022_S1_100cm_MT	5	1330919	1333642	2724	11625022	0.157895	-	-	-	-	-	-	-	-
SRVP_Atabeya-2-AMLJHBDE_13490	SRVP_Atabeya-2_1349 # 1334152 # 1337292 # 1 # ID=1_1349;partial=00;start_type=ATG;rbs_motif=GGxGG;rbs_spacer=11-12bp;gc_cont=0.509	SRVP_Atabeya-2_1349	SR-VP_11_27_2022_S1_100cm_MT	12	1334152	1337292	3141	11625022	0.328639	-	-	-	-	-	-	-	-
SRVP_Atabeya-2-AMLJHBDE_13550	SRVP_Atabeya-2_1355 # 1339997 # 1341334 # -1 # ID=1_1355;partial=00;start_type=ATG;rbs_motif=GGA/GAG/AGG;rbs_spacer=5-10bp;gc_cont=0.475	SRVP_Atabeya-2_1355	SR-VP_11_27_2022_S1_100cm_MT	2	1339997	1341334	1338	11625022	0.128582	arCOG01340	-	Acyl-CoA_synthetase_(NDP_forming)	C	COG1042	Acyl-CoA_synthetase_(NDP_forming)	C	-
SRVP_Atabeya-2-AMLJHBDE_13560	SRVP_Atabeya-2_1356 # 1341535 # 1342656 # -1 # ID=1_1356;partial=00;start_type=ATG;rbs_motif=GGAG/GAGG;rbs_spacer=5-10bp;gc_cont=0.481	SRVP_Atabeya-2_1356	SR-VP_11_27_2022_S1_100cm_MT	12	1341535	1342656	1122	11625022	0.920014	arCOG00662	-	Biotin_synthase-related_protein,_radical_SAM_superfamily	R	COG2516	Biotin_synthase-related_protein,_radical_SAM_superfamily	R	-
SRVP_Atabeya-2-AMLJHBDE_13610	SRVP_Atabeya-2_1361 # 1347542 # 1349146 # 1 # ID=1_1361;partial=00;start_type=ATG;rbs_motif=AGGA/GGAG/GAGG;rbs_spacer=11-12bp;gc_cont=0.490	SRVP_Atabeya-2_1361	SR-VP_11_27_2022_S1_100cm_MT	56	1347542	1349146	1605	11625022	3.00137	-	-	-	-	-	-	-	-
SRVP_Atabeya-2-AMLJHBDE_13630	SRVP_Atabeya-2_1363 # 1350205 # 1350714 # -1 # ID=1_1363;partial=00;start_type=ATG;rbs_motif=GGA/GAG/AGG;rbs_spacer=5-10bp;gc_cont=0.461	SRVP_Atabeya-2_1363	SR-VP_11_27_2022_S1_100cm_MT	8	1350205	1350714	510	11625022	1.34935	arCOG00362	Srp102	Signal_recognition_particle_receptor_subunit_beta,_a_GTPase	U	COG2229	Signal_recognition_particle_receptor_subunit_beta,_a_GTPase	U	-
SRVP_Atabeya-2-AMLJHBDE_13640	SRVP_Atabeya-2_1364 # 1350805 # 1351182 # 1 # ID=1_1364;partial=00;start_type=TTG;rbs_motif=GGA/GAG/AGG;rbs_spacer=11-12bp;gc_cont=0.437	SRVP_Atabeya-2_1364	SR-VP_11_27_2022_S1_60cm_MT	1	1350805	1351182	378	1990488	1.32907	-	-	-	-	-	-	-	-
SRVP_Atabeya-2-AMLJHBDE_13650	SRVP_Atabeya-2_1365 # 1351015 # 1351812 # -1 # ID=1_1365;partial=00;start_type=TTG;rbs_motif=GGAG/GAGG;rbs_spacer=5-10bp;gc_cont=0.460	SRVP_Atabeya-2_1365	SR-VP_11_27_2022_S1_100cm_MT	12	1351015	1351812	798	11625022	1.29355	arCOG01648	MhpC	Alpha/beta_superfamily_hydrolase	R	COG0596	2-succinyl-6-hydroxy-2,4-cyclohexadiene-1-carboxylate_synthase_MenH_and_related_esterases,_alpha/beta_hydrolase_fold	HR	Menaquinone_biosynthesis
SRVP_Atabeya-2-AMLJHBDE_13720	SRVP_Atabeya-2_1372 # 1356596 # 1358572 # -1 # ID=1_1372;partial=00;start_type=TTG;rbs_motif=AGGAGG;rbs_spacer=11-12bp;gc_cont=0.479	SRVP_Atabeya-2_1372	SR-VP_11_27_2022_S1_100cm_MT	2	1356596	1358572	1977	11625022	0.0870221	arCOG00073	CysH/DndC	PAPS_reductase_related_enzyme__fused_to_RNA-binding_PUA_domain_and_ferredoxin_domain	E	COG5270	PUA_domain_(predicted_RNA-binding_domain)	J	-
SRVP_Atabeya-2-AMLJHBDE_13740	SRVP_Atabeya-2_1374 # 1359315 # 1360745 # 1 # ID=1_1374;partial=00;start_type=TTG;rbs_motif=AGGAG/GGAGG;rbs_spacer=11-12bp;gc_cont=0.484	SRVP_Atabeya-2_1374	SR-VP_11_27_2022_S1_100cm_MT	1	1359315	1360745	1431	11625022	0.0601127	arCOG00321	TldD	Zn-dependent_protease,_component_of_TldD/TldE_system	O	COG0312	Zn-dependent_protease_PmbA/TldA_or_its_inactivated_homolog	R	-
SRVP_Atabeya-2-AMLJHBDE_13750	SRVP_Atabeya-2_1375 # 1360752 # 1362185 # 1 # ID=1_1375;partial=00;start_type=GTG;rbs_motif=AGGAGG;rbs_spacer=5-10bp;gc_cont=0.480	SRVP_Atabeya-2_1375	SR-VP_11_27_2022_S1_100cm_MT	5	1360752	1362185	1434	11625022	0.299935	arCOG00322	TldE	Inactivated_Zn-dependent_protease,_component_of_TldD/TldE_system	O	COG0312	Zn-dependent_protease_PmbA/TldA_or_its_inactivated_homolog	R	-
SRVP_Atabeya-2-AMLJHBDE_13770	SRVP_Atabeya-2_1377 # 1363624 # 1364373 # 1 # ID=1_1377;partial=00;start_type=ATG;rbs_motif=GGAGG;rbs_spacer=5-10bp;gc_cont=0.484	SRVP_Atabeya-2_1377	SR-VP_11_27_2022_S1_100cm_MT	1	1363624	1364373	750	11625022	0.114695	arCOG00500	ElaC	Metal-dependent_hydrolase_of_the_beta-lactamase_superfamily	R	COG1234	Ribonuclease_BN,_tRNA_processing_enzyme	J	-
SRVP_Atabeya-2-AMLJHBDE_13800	SRVP_Atabeya-2_1380 # 1367167 # 1368474 # -1 # ID=1_1380;partial=00;start_type=ATG;rbs_motif=GGxGG;rbs_spacer=5-10bp;gc_cont=0.474	SRVP_Atabeya-2_1380	SR-VP_11_27_2022_S1_100cm_MT	2	1367167	1368474	1308	11625022	0.131531	arCOG00755	DadA	Glycine/D-amino_acid_oxidase_(deaminating)	E	COG0665	Glycine/D-amino_acid_oxidase_(deaminating)	E	-
SRVP_Atabeya-2-AMLJHBDE_13840	SRVP_Atabeya-2_1384 # 1371335 # 1371601 # 1 # ID=1_1384;partial=00;start_type=TTG;rbs_motif=GGA/GAG/AGG;rbs_spacer=5-10bp;gc_cont=0.468	SRVP_Atabeya-2_1384	SR-VP_11_27_2022_S1_100cm_MT	3	1371335	1371601	267	11625022	0.966532	arCOG00296	NapF	Ferredoxin	C	COG1149	MinD_superfamily_P-loop_ATPase,_contains_an_inserted_ferredoxin_domain	R	-
SRVP_Atabeya-2-AMLJHBDE_13850	SRVP_Atabeya-2_1385 # 1371749 # 1372228 # -1 # ID=1_1385;partial=00;start_type=ATG;rbs_motif=GGAGG;rbs_spacer=5-10bp;gc_cont=0.463	SRVP_Atabeya-2_1385	SR-VP_11_27_2022_S1_100cm_MT	1	1371749	1372228	480	11625022	0.179211	-	-	-	-	-	-	-	-
SRVP_Atabeya-2-AMLJHBDE_13920	SRVP_Atabeya-2_1392 # 1380299 # 1381120 # 1 # ID=1_1392;partial=00;start_type=TTG;rbs_motif=GGxGG;rbs_spacer=5-10bp;gc_cont=0.446	SRVP_Atabeya-2_1392	SR-VP_11_27_2022_S1_100cm_MT	2	1380299	1381120	822	11625022	0.209298	-	-	-	-	-	-	-	-
SRVP_Atabeya-2-AMLJHBDE_13940	SRVP_Atabeya-2_1394 # 1382626 # 1384371 # 1 # ID=1_1394;partial=00;start_type=ATG;rbs_motif=GGAG/GAGG;rbs_spacer=5-10bp;gc_cont=0.474	SRVP_Atabeya-2_1394	SR-VP_11_27_2022_S1_100cm_MT	6	1382626	1384371	1746	11625022	0.295606	arCOG01606	PorA	Pyruvate:ferredoxin_oxidoreductase_or_related_2-oxoacid:ferredoxin_oxidoreductase,_alpha_subunit_and_gamma	C	COG0674	Pyruvate:ferredoxin_oxidoreductase_or_related_2-oxoacid:ferredoxin_oxidoreductase,_alpha_subunit	C	Pyruvate_oxidation
SRVP_Atabeya-2-AMLJHBDE_14010	SRVP_Atabeya-2_1401 # 1388792 # 1391242 # -1 # ID=1_1401;partial=00;start_type=ATG;rbs_motif=GGA/GAG/AGG;rbs_spacer=5-10bp;gc_cont=0.485	SRVP_Atabeya-2_1401	SR-VP_11_27_2022_S1_100cm_MT	3	1388792	1391242	2451	11625022	0.105289	arCOG02476	HdrA	Heterodisulfide_reductase,_subunit_A;_ferredoxin_domain	C	COG1144	Pyruvate:ferredoxin_oxidoreductase_or_related_2-oxoacid:ferredoxin_oxidoreductase,_delta_subunit	C	Pyruvate_oxidation
SRVP_Atabeya-2-AMLJHBDE_14050	SRVP_Atabeya-2_1405 # 1393455 # 1394603 # -1 # ID=1_1405;partial=00;start_type=TTG;rbs_motif=AGGAG/GGAGG;rbs_spacer=11-12bp;gc_cont=0.498	SRVP_Atabeya-2_1405	SR-VP_11_27_2022_S1_100cm_MT	3	1393455	1394603	1149	11625022	0.224599	arCOG02447	-	Uncharacterized_protein	S	COG2006	Uncharacterized_conserved_protein,_DUF362_family	S	-
SRVP_Atabeya-2-AMLJHBDE_14060	SRVP_Atabeya-2_1406 # 1394800 # 1395402 # -1 # ID=1_1406;partial=00;start_type=TTG;rbs_motif=AGGAG/GGAGG;rbs_spacer=11-12bp;gc_cont=0.471	SRVP_Atabeya-2_1406	SR-VP_11_27_2022_S1_100cm_MT	4	1394800	1395402	603	11625022	0.570623	arCOG07487	-	QueT_transporter,_involved_in_queuosine_biosynthetic_intermediate_uptake	J	COG4708	ECF-type_transporter_of_queuosine_precursor,_membrane_(S)_component	FJ	-
SRVP_Atabeya-2-AMLJHBDE_14080	SRVP_Atabeya-2_1408 # 1396142 # 1397155 # 1 # ID=1_1408;partial=00;start_type=ATG;rbs_motif=AGGA/GGAG/GAGG;rbs_spacer=11-12bp;gc_cont=0.471	SRVP_Atabeya-2_1408	SR-VP_07_25_2022_A1_70cm_MT	5	1396142	1397155	1014	125142	39.403	arCOG01459	Tdh	Threonine_dehydrogenase_or_related_Zn-dependent_dehydrogenase	E	COG1063	Threonine_dehydrogenase_or_related_Zn-dependent_dehydrogenase	ER	Non-phosphorylated_Entner-Doudoroff_pathway
SRVP_Atabeya-2-AMLJHBDE_14110	SRVP_Atabeya-2_1411 # 1399619 # 1400200 # 1 # ID=1_1411;partial=00;start_type=ATG;rbs_motif=GGAGG;rbs_spacer=5-10bp;gc_cont=0.460	SRVP_Atabeya-2_1411	SR-VP_11_27_2022_S1_100cm_MT	2	1399619	1400200	582	11625022	0.295606	arCOG01705	DmrX	Dihydromethanopterin_reductase,_flavoprotein	H	COG1036	Archaeal_flavoprotein	C	-
SRVP_Atabeya-2-AMLJHBDE_14120	SRVP_Atabeya-2_1412 # 1400203 # 1401696 # -1 # ID=1_1412;partial=00;start_type=TTG;rbs_motif=GGxGG;rbs_spacer=5-10bp;gc_cont=0.450	SRVP_Atabeya-2_1412	SR-VP_11_27_2022_S1_100cm_MT	2	1400203	1401696	1494	11625022	0.115156	arCOG04758	PepF	Oligoendopeptidase_F	E	COG1164	Oligoendopeptidase_F	E	-
SRVP_Atabeya-2-AMLJHBDE_14150	SRVP_Atabeya-2_1415 # 1403874 # 1405088 # -1 # ID=1_1415;partial=00;start_type=TTG;rbs_motif=AGGAG/GGAGG;rbs_spacer=11-12bp;gc_cont=0.458	SRVP_Atabeya-2_1415	SR-VP_11_27_2022_S1_100cm_MT	2	1403874	1405088	1215	11625022	0.141599	arCOG00065	csdA	Selenocysteine_lyase/Cysteine_desulfurase	O	COG0520	Selenocysteine_lyase/Cysteine_desulfurase	E	-
SRVP_Atabeya-2-AMLJHBDE_14240	SRVP_Atabeya-2_1424 # 1412607 # 1415225 # 1 # ID=1_1424;partial=00;start_type=ATG;rbs_motif=GGA/GAG/AGG;rbs_spacer=11-12bp;gc_cont=0.480	SRVP_Atabeya-2_1424	SR-VP_11_27_2022_S1_100cm_MT	1	1412607	1415225	2619	11625022	0.0328451	arCOG02312	SalY	ABC-type_antimicrobial_peptide_transport_system,_permease_component	V	COG3127	Predicted_ABC-type_transport_system_involved_in_lysophospholipase_L1_biosynthesis,_permease_component	Q	-
SRVP_Atabeya-2-AMLJHBDE_14250	SRVP_Atabeya-2_1425 # 1415280 # 1416329 # 1 # ID=1_1425;partial=00;start_type=ATG;rbs_motif=GGAG/GAGG;rbs_spacer=5-10bp;gc_cont=0.467	SRVP_Atabeya-2_1425	SR-VP_11_27_2022_S1_100cm_MT	3	1415280	1416329	1050	11625022	0.245775	arCOG01754	SerA	Phosphoglycerate_dehydrogenase_or_related_dehydrogenase	H	COG1052	Lactate_dehydrogenase_or_related_2-hydroxyacid_dehydrogenase	CHR	Pyridoxal_phosphate_biosynthesis
SRVP_Atabeya-2-AMLJHBDE_14270	SRVP_Atabeya-2_1427 # 1418415 # 1419560 # 1 # ID=1_1427;partial=00;start_type=GTG;rbs_motif=AGGA/GGAG/GAGG;rbs_spacer=11-12bp;gc_cont=0.503	SRVP_Atabeya-2_1427	SR-VP_11_27_2022_S1_100cm_MT	3	1418415	1419560	1146	11625022	0.225187	arCOG00130	-	MFS_family_permease	G	COG2807	Cyanate_permease	P	-
SRVP_Atabeya-2-AMLJHBDE_14310	SRVP_Atabeya-2_1431 # 1422369 # 1423196 # 1 # ID=1_1431;partial=00;start_type=ATG;rbs_motif=GGAG/GAGG;rbs_spacer=5-10bp;gc_cont=0.483	SRVP_Atabeya-2_1431	SR-VP_11_27_2022_S1_100cm_MT	4	1422369	1423196	828	11625022	0.415562	arCOG02199	Mcr1	NAD(P)H-flavin_reductase	H	COG0543	NAD(P)H-flavin_reductase	HC	-
SRVP_Atabeya-2-AMLJHBDE_14320	SRVP_Atabeya-2_1432 # 1423220 # 1424065 # 1 # ID=1_1432;partial=00;start_type=ATG;rbs_motif=AGGAGG;rbs_spacer=11-12bp;gc_cont=0.502	SRVP_Atabeya-2_1432	SR-VP_11_27_2022_S1_100cm_MT	4	1423220	1424065	846	11625022	0.40672	arCOG02472	FrhG	Coenzyme_F420-reducing_hydrogenase,_gamma_subunit	C	COG1941	Coenzyme_F420-reducing_hydrogenase,_gamma_subunit	C	-
SRVP_Atabeya-2-AMLJHBDE_14330	SRVP_Atabeya-2_1433 # 1424062 # 1425357 # 1 # ID=1_1433;partial=00;start_type=ATG;rbs_motif=AGGAGG;rbs_spacer=5-10bp;gc_cont=0.472	SRVP_Atabeya-2_1433	SR-VP_11_27_2022_S1_100cm_MT	2	1424062	1425357	1296	11625022	0.132749	arCOG01549	FrhA	Coenzyme_F420-reducing_hydrogenase,_alpha_subunit	C	COG3261	Ni,Fe-hydrogenase_III_large_subunit	C	-
SRVP_Atabeya-2-AMLJHBDE_14350	SRVP_Atabeya-2_1435 # 1426135 # 1429062 # -1 # ID=1_1435;partial=00;start_type=ATG;rbs_motif=GGA/GAG/AGG;rbs_spacer=5-10bp;gc_cont=0.482	SRVP_Atabeya-2_1435	SR-VP_11_27_2022_S1_100cm_MT	6	1426135	1429062	2928	11625022	0.176273	arCOG04694	UvrA	Excinuclease_ABC_subunit_A,__ATPase	L	COG0178	Excinuclease_UvrABC_ATPase_subunit	L	-
SRVP_Atabeya-2-AMLJHBDE_14360	SRVP_Atabeya-2_1436 # 1429323 # 1430186 # -1 # ID=1_1436;partial=00;start_type=ATG;rbs_motif=None;rbs_spacer=None;gc_cont=0.471	SRVP_Atabeya-2_1436	SR-VP_11_27_2022_S1_100cm_MT	8	1429323	1430186	864	11625022	0.796494	-	-	-	-	-	-	-	-
SRVP_Atabeya-2-AMLJHBDE_14370	SRVP_Atabeya-2_1437 # 1430538 # 1431851 # 1 # ID=1_1437;partial=00;start_type=TTG;rbs_motif=AGGAG;rbs_spacer=5-10bp;gc_cont=0.489	SRVP_Atabeya-2_1437	SR-VP_11_27_2022_S1_100cm_MT	12	1430538	1431851	1314	11625022	0.785583	arCOG01432	-	Tryptophan_synthase_beta-subunit	E	COG1350	Predicted_alternative_tryptophan_synthase_beta-subunit_(paralog_of_TrpB)	E	Aromatic_amino_acid_biosynthesis
SRVP_Atabeya-2-AMLJHBDE_14380	SRVP_Atabeya-2_1438 # 1431966 # 1432796 # 1 # ID=1_1438;partial=00;start_type=ATG;rbs_motif=GGAG/GAGG;rbs_spacer=5-10bp;gc_cont=0.449	SRVP_Atabeya-2_1438	SR-VP_11_27_2022_S1_100cm_MT	1	1431966	1432796	831	11625022	0.103515	-	-	-	-	COG0266	Formamidopyrimidine-DNA_glycosylase	L	-
SRVP_Atabeya-2-AMLJHBDE_14390	SRVP_Atabeya-2_1439 # 1432827 # 1434869 # -1 # ID=1_1439;partial=00;start_type=ATG;rbs_motif=GGA/GAG/AGG;rbs_spacer=5-10bp;gc_cont=0.470	SRVP_Atabeya-2_1439	SR-VP_11_27_2022_S1_100cm_MT	1	1432827	1434869	2043	11625022	0.0421054	arCOG04748	UvrB	Excinuclease_ABC_subunit_B,_helicase	L	COG0556	Excinuclease_UvrABC_helicase_subunit_UvrB	L	-
SRVP_Atabeya-2-AMLJHBDE_14440	SRVP_Atabeya-2_1444 # 1437320 # 1438414 # -1 # ID=1_1444;partial=00;start_type=ATG;rbs_motif=GGA/GAG/AGG;rbs_spacer=5-10bp;gc_cont=0.450	SRVP_Atabeya-2_1444	SR-VP_11_27_2022_S1_100cm_MT	1	1437320	1438414	1095	11625022	0.0785583	arCOG01334	HtpX	Zn-dependent_protease_with_chaperone_function	O	COG0501	Zn-dependent_protease_with_chaperone_function	O	-
SRVP_Atabeya-2-AMLJHBDE_14450	SRVP_Atabeya-2_1445 # 1438553 # 1439482 # -1 # ID=1_1445;partial=00;start_type=ATG;rbs_motif=GGAG/GAGG;rbs_spacer=5-10bp;gc_cont=0.473	SRVP_Atabeya-2_1445	SR-VP_11_27_2022_S1_100cm_MT	2	1438553	1439482	930	11625022	0.184992	arCOG00362	Srp102	Signal_recognition_particle_receptor_subunit_beta,_a_GTPase	U	COG1100	GTPase_SAR1_family_domain	R	-
SRVP_Atabeya-2-AMLJHBDE_14460	SRVP_Atabeya-2_1446 # 1439832 # 1440923 # 1 # ID=1_1446;partial=00;start_type=TTG;rbs_motif=GGAG/GAGG;rbs_spacer=5-10bp;gc_cont=0.447	SRVP_Atabeya-2_1446	SR-VP_11_27_2022_S1_100cm_MT	2	1439832	1440923	1092	11625022	0.157548	arCOG08120	-	Predicted_transcriptional_regulator,_contains_HTH_domain	K	COG1777	Predicted_transcriptional_regulator,_ArsR_family	K	-
SRVP_Atabeya-2-AMLJHBDE_14470	SRVP_Atabeya-2_1447 # 1441024 # 1445136 # 1 # ID=1_1447;partial=00;start_type=ATG;rbs_motif=GGxGG;rbs_spacer=5-10bp;gc_cont=0.480	SRVP_Atabeya-2_1447	SR-VP_11_27_2022_S1_100cm_MT	44	1441024	1445136	4113	11625022	0.920238	-	-	-	-	-	-	-	-
SRVP_Atabeya-2-AMLJHBDE_14500	SRVP_Atabeya-2_1450 # 1449008 # 1450585 # 1 # ID=1_1450;partial=00;start_type=ATG;rbs_motif=AGGA/GGAG/GAGG;rbs_spacer=11-12bp;gc_cont=0.442	SRVP_Atabeya-2_1450	SR-VP_07_25_2022_A4_70cm_MT	1	1449008	1450585	1578	19546	32.4216	arCOG01356	-	Radical_SAM_superfamily_enzyme	C	COG1032	Radical_SAM_superfamily_enzyme_YgiQ,_UPF0313_family	R	-
SRVP_Atabeya-2-AMLJHBDE_14560	SRVP_Atabeya-2_1456 # 1454003 # 1455706 # 1 # ID=1_1456;partial=00;start_type=TTG;rbs_motif=AGGAG/GGAGG;rbs_spacer=11-12bp;gc_cont=0.444	SRVP_Atabeya-2_1456	SR-VP_07_25_2022_A1_70cm_MT	1	1454003	1455706	1704	125142	4.68951	-	-	-	-	COG4805	Uncharacterized_conserved_protein,_DUF885_family	S	-
SRVP_Atabeya-2-AMLJHBDE_14610	SRVP_Atabeya-2_1461 # 1458581 # 1459813 # -1 # ID=1_1461;partial=00;start_type=ATG;rbs_motif=GGA/GAG/AGG;rbs_spacer=3-4bp;gc_cont=0.579	SRVP_Atabeya-2_1461	SR-VP_11_27_2022_S1_100cm_MT	5	1458581	1459813	1233	11625022	0.348829	arCOG00679	-	Transposable_element,_IS605_OrfB_family,_contains_RNAse_H_fold_nuclease_and_Zn_finger_domains	X	COG0675	Transposase	X	-
SRVP_Atabeya-2-AMLJHBDE_14620	SRVP_Atabeya-2_1462 # 1460012 # 1462354 # 1 # ID=1_1462;partial=00;start_type=ATG;rbs_motif=None;rbs_spacer=None;gc_cont=0.481	SRVP_Atabeya-2_1462	SR-VP_11_27_2022_S1_100cm_MT	416	1460012	1462354	2343	11625022	15.2731	-	-	-	-	-	-	-	-
SRVP_Atabeya-2-AMLJHBDE_14650	SRVP_Atabeya-2_1465 # 1463188 # 1464591 # 1 # ID=1_1465;partial=00;start_type=GTG;rbs_motif=GGAG/GAGG;rbs_spacer=5-10bp;gc_cont=0.486	SRVP_Atabeya-2_1465	SR-VP_11_27_2022_S1_100cm_MT	3	1463188	1464591	1404	11625022	0.183806	arCOG00321	TldD	Zn-dependent_protease,_component_of_TldD/TldE_system	O	COG0312	Zn-dependent_protease_PmbA/TldA_or_its_inactivated_homolog	R	-
SRVP_Atabeya-2-AMLJHBDE_14660	SRVP_Atabeya-2_1466 # 1464683 # 1465390 # -1 # ID=1_1466;partial=00;start_type=TTG;rbs_motif=AGGAGG;rbs_spacer=5-10bp;gc_cont=0.476	SRVP_Atabeya-2_1466	SR-VP_11_27_2022_S1_100cm_MT	2	1464683	1465390	708	11625022	0.242998	arCOG01171	KaiC	KaiC_family_ATPase_implicated_in_signal_transduction	T	COG0467	RecA-superfamily_ATPase,_KaiC/GvpD/RAD55_family	T	-
SRVP_Atabeya-2-AMLJHBDE_14730	SRVP_Atabeya-2_1473 # 1472298 # 1473446 # -1 # ID=1_1473;partial=00;start_type=ATG;rbs_motif=GGA/GAG/AGG;rbs_spacer=5-10bp;gc_cont=0.481	SRVP_Atabeya-2_1473	SR-VP_11_27_2022_S1_100cm_MT	1	1472298	1473446	1149	11625022	0.0748663	arCOG04253	-	Uncharacterized_protein,_DUF763_family	S	COG1415	Uncharacterized_conserved_protein,_DUF763_domain	S	-
SRVP_Atabeya-2-AMLJHBDE_14790	SRVP_Atabeya-2_1479 # 1480262 # 1481470 # -1 # ID=1_1479;partial=00;start_type=TTG;rbs_motif=AGGAG/GGAGG;rbs_spacer=11-12bp;gc_cont=0.511	SRVP_Atabeya-2_1479	SR-VP_11_27_2022_S1_100cm_MT	33	1480262	1481470	1209	11625022	2.34798	arCOG01707	CaiA	Acyl-CoA_dehydrogenase	I	COG1960	Acyl-CoA_dehydrogenase_related_to_the_alkylation_response_protein_AidB	I	Fatty_acid_biosynthesis
SRVP_Atabeya-2-AMLJHBDE_14870	SRVP_Atabeya-2_1487 # 1489194 # 1490138 # -1 # ID=1_1487;partial=00;start_type=ATG;rbs_motif=GGA/GAG/AGG;rbs_spacer=5-10bp;gc_cont=0.444	SRVP_Atabeya-2_1487	SR-VP_11_27_2022_S1_40cm_MT	1	1489194	1490138	945	1473124	0.718338	arCOG04468	WcaG	Nucleoside-diphosphate-sugar_epimerase	M	COG0451	Nucleoside-diphosphate-sugar_epimerase	M	-
SRVP_Atabeya-2-AMLJHBDE_14880	SRVP_Atabeya-2_1488 # 1490519 # 1491115 # 1 # ID=1_1488;partial=00;start_type=ATG;rbs_motif=GGA/GAG/AGG;rbs_spacer=5-10bp;gc_cont=0.469	SRVP_Atabeya-2_1488	SR-VP_11_27_2022_S1_100cm_MT	1	1490519	1491115	597	11625022	0.144089	arCOG00264	YedY	Periplasmic_DMSO/TMAO_reductase_YedYZ,_molybdopterin-dependent_catalytic_subunit	C	COG2041	Molybdopterin-dependent_catalytic_subunit_of_periplasmic_DMSO/TMAO_and_protein-methionine-sulfoxide_reductases	C	-
SRVP_Atabeya-2-AMLJHBDE_14890	SRVP_Atabeya-2_1489 # 1491393 # 1491812 # 1 # ID=1_1489;partial=00;start_type=GTG;rbs_motif=GGA/GAG/AGG;rbs_spacer=5-10bp;gc_cont=0.448	SRVP_Atabeya-2_1489	SR-VP_11_27_2022_S1_100cm_MT	1	1491393	1491812	420	11625022	0.204813	arCOG01644	-	Predicted_membrane_protein_associated_with_conjugation_system	S	-	-	-	-
SRVP_Atabeya-2-AMLJHBDE_14920	SRVP_Atabeya-2_1492 # 1496138 # 1497379 # 1 # ID=1_1492;partial=00;start_type=TTG;rbs_motif=GGA/GAG/AGG;rbs_spacer=5-10bp;gc_cont=0.465	SRVP_Atabeya-2_1492	SR-VP_11_27_2022_S1_100cm_MT	5	1496138	1497379	1242	11625022	0.346302	arCOG05412	BglB	Beta-glucosidase/6-phospho-beta-glucosidase/beta-galactosidase	G	COG2723	Beta-glucosidase/6-phospho-beta-glucosidase/beta-galactosidase	G	-
SRVP_Atabeya-2-AMLJHBDE_15020	SRVP_Atabeya-2_1502 # 1504756 # 1505883 # -1 # ID=1_1502;partial=00;start_type=ATG;rbs_motif=GGA/GAG/AGG;rbs_spacer=5-10bp;gc_cont=0.483	SRVP_Atabeya-2_1502	SR-VP_11_27_2022_S1_100cm_MT	1	1504756	1505883	1128	11625022	0.0762601	arCOG00570	-	Geranylgeranyl_reductase,_flavoprotein	I	COG0644	Dehydrogenase_(flavoprotein)	C	-
SRVP_Atabeya-2-AMLJHBDE_15120	SRVP_Atabeya-2_1512 # 1513298 # 1514758 # -1 # ID=1_1512;partial=00;start_type=TTG;rbs_motif=GGA/GAG/AGG;rbs_spacer=5-10bp;gc_cont=0.461	SRVP_Atabeya-2_1512	SR-VP_11_27_2022_S1_100cm_MT	2	1513298	1514758	1461	11625022	0.117757	arCOG00486	CysS	Cysteinyl-tRNA_synthetase	J	COG0215	Cysteinyl-tRNA_synthetase	J	Aminoacyl-tRNA_synthetases
SRVP_Atabeya-2-AMLJHBDE_15160	SRVP_Atabeya-2_1516 # 1516719 # 1518059 # -1 # ID=1_1516;partial=00;start_type=ATG;rbs_motif=GGA/GAG/AGG;rbs_spacer=11-12bp;gc_cont=0.456	SRVP_Atabeya-2_1516	SR-VP_11_27_2022_S1_100cm_MT	2	1516719	1518059	1341	11625022	0.128294	-	-	-	-	COG1475	Chromosome_segregation_protein_Spo0J,_contains_ParB-like_nuclease_domain	D	-
SRVP_Atabeya-2-AMLJHBDE_15190	SRVP_Atabeya-2_1519 # 1519771 # 1520412 # 1 # ID=1_1519;partial=00;start_type=ATG;rbs_motif=None;rbs_spacer=None;gc_cont=0.374	SRVP_Atabeya-2_1519	SR-VP_11_27_2022_S1_100cm_MT	2	1519771	1520412	642	11625022	0.267979	arCOG00724	-	Transcriptional_regulator,_PadR_family	K	COG3465	Uncharacterized_conserved_protein_YwgA	S	-
SRVP_Atabeya-2-AMLJHBDE_15200	SRVP_Atabeya-2_1520 # 1520387 # 1520719 # 1 # ID=1_1520;partial=00;start_type=ATG;rbs_motif=GGxGG;rbs_spacer=11-12bp;gc_cont=0.417	SRVP_Atabeya-2_1520	SR-VP_11_27_2022_S1_100cm_MT	3	1520387	1520719	333	11625022	0.774967	-	-	-	-	-	-	-	-
SRVP_Atabeya-2-AMLJHBDE_15230	SRVP_Atabeya-2_1523 # 1522864 # 1523727 # 1 # ID=1_1523;partial=00;start_type=ATG;rbs_motif=GGA/GAG/AGG;rbs_spacer=5-10bp;gc_cont=0.443	SRVP_Atabeya-2_1523	SR-VP_11_27_2022_S1_100cm_MT	2	1522864	1523727	864	11625022	0.199123	-	-	-	-	COG3285	Eukaryotic-type_DNA_primase	L	-
SRVP_Atabeya-2-AMLJHBDE_15290	SRVP_Atabeya-2_1529 # 1528485 # 1529180 # 1 # ID=1_1529;partial=00;start_type=TTG;rbs_motif=GGA/GAG/AGG;rbs_spacer=11-12bp;gc_cont=0.467	SRVP_Atabeya-2_1529	SR-VP_11_27_2022_S1_100cm_MT	5	1528485	1529180	696	11625022	0.617969	arCOG00312	AhpC	AhpC/TSA_family_peroxiredoxin	O	COG2077	Peroxiredoxin	O	-
SRVP_Atabeya-2-AMLJHBDE_15310	SRVP_Atabeya-2_1531 # 1530190 # 1531287 # 1 # ID=1_1531;partial=00;start_type=TTG;rbs_motif=GGxGG;rbs_spacer=5-10bp;gc_cont=0.459	SRVP_Atabeya-2_1531	SR-VP_07_25_2022_A1_70cm_MT	1	1530190	1531287	1098	125142	7.27771	arCOG00938	-	Radical_SAM_superfamily_enzyme	R	COG0641	Sulfatase_maturation_enzyme_AslB,_radical_SAM_superfamily	O	-
SRVP_Atabeya-2-AMLJHBDE_15330	SRVP_Atabeya-2_1533 # 1531356 # 1532228 # -1 # ID=1_1533;partial=00;start_type=TTG;rbs_motif=AGGAG;rbs_spacer=5-10bp;gc_cont=0.477	SRVP_Atabeya-2_1533	SR-VP_11_27_2022_S1_100cm_MT	6	1531356	1532228	873	11625022	0.591212	arCOG02019	SseA	Rhodanese-related_sulfurtransferase	P	-	-	-	-
SRVP_Atabeya-2-AMLJHBDE_15360	SRVP_Atabeya-2_1536 # 1533341 # 1534036 # 1 # ID=1_1536;partial=00;start_type=ATG;rbs_motif=GGAGG;rbs_spacer=5-10bp;gc_cont=0.486	SRVP_Atabeya-2_1536	SR-VP_11_27_2022_S1_80cm_MT	1	1533341	1534036	696	4000856	0.359119	arCOG00922	SalX	ABC-type_antimicrobial_peptide_transport_system,_ATPase_component	V	COG1136	ABC-type_lipoprotein_export_system,_ATPase_component	M	-
SRVP_Atabeya-2-AMLJHBDE_15370	SRVP_Atabeya-2_1537 # 1534082 # 1535356 # 1 # ID=1_1537;partial=00;start_type=ATG;rbs_motif=AGGAG/GGAGG;rbs_spacer=11-12bp;gc_cont=0.459	SRVP_Atabeya-2_1537	SR-VP_11_27_2022_S1_100cm_MT	3	1534082	1535356	1275	11625022	0.202403	arCOG02312	SalY	ABC-type_antimicrobial_peptide_transport_system,_permease_component	V	COG3127	Predicted_ABC-type_transport_system_involved_in_lysophospholipase_L1_biosynthesis,_permease_component	Q	-
SRVP_Atabeya-2-AMLJHBDE_15390	SRVP_Atabeya-2_1539 # 1536629 # 1537246 # 1 # ID=1_1539;partial=00;start_type=ATG;rbs_motif=GGAG/GAGG;rbs_spacer=5-10bp;gc_cont=0.477	SRVP_Atabeya-2_1539	SR-VP_11_27_2022_S1_100cm_MT	2	1536629	1537246	618	11625022	0.278386	-	-	-	-	-	-	-	-
SRVP_Atabeya-2-AMLJHBDE_15400	SRVP_Atabeya-2_1540 # 1537422 # 1537799 # -1 # ID=1_1540;partial=00;start_type=ATG;rbs_motif=GGAG/GAGG;rbs_spacer=5-10bp;gc_cont=0.471	SRVP_Atabeya-2_1540	SR-VP_11_27_2022_S1_100cm_MT	449	1537422	1537799	378	11625022	102.179	arCOG10940	-	Uncharacterized_membrane_protein	S	-	-	-	-
SRVP_Atabeya-2-AMLJHBDE_15410	SRVP_Atabeya-2_1541 # 1538126 # 1539217 # -1 # ID=1_1541;partial=00;start_type=TTG;rbs_motif=AGGAG/GGAGG;rbs_spacer=11-12bp;gc_cont=0.476	SRVP_Atabeya-2_1541	SR-VP_11_27_2022_S1_100cm_MT	17	1538126	1539217	1092	11625022	1.33916	arCOG01888	AmpS	Leucyl_aminopeptidase_(aminopeptidase_T)	E	COG2309	Leucyl_aminopeptidase_(aminopeptidase_T)	E	-
SRVP_Atabeya-2-AMLJHBDE_15430	SRVP_Atabeya-2_1543 # 1540556 # 1542469 # 1 # ID=1_1543;partial=00;start_type=TTG;rbs_motif=GGA/GAG/AGG;rbs_spacer=5-10bp;gc_cont=0.489	SRVP_Atabeya-2_1543	SR-VP_11_27_2022_S1_100cm_MT	2	1540556	1542469	1914	11625022	0.0898865	arCOG00615	NemA	NADH:flavin_oxidoreductase,_Old_Yellow_Enzyme_family	C	COG1902	2,4-dienoyl-CoA_reductase_or_related_NADH-dependent_reductase,_Old_Yellow_Enzyme_(OYE)_family	C	-
SRVP_Atabeya-2-AMLJHBDE_15480	SRVP_Atabeya-2_1548 # 1546941 # 1548608 # 1 # ID=1_1548;partial=00;start_type=ATG;rbs_motif=AGGAG;rbs_spacer=5-10bp;gc_cont=0.464	SRVP_Atabeya-2_1548	SR-VP_11_27_2022_S1_100cm_MT	2	1546941	1548608	1668	11625022	0.103143	arCOG01648	MhpC	Alpha/beta_superfamily_hydrolase	R	COG1073	Fermentation-respiration_switch_esterase_FrsA,_DUF1100_family	T	-
SRVP_Atabeya-2-AMLJHBDE_15550	SRVP_Atabeya-2_1555 # 1554235 # 1554486 # 1 # ID=1_1555;partial=00;start_type=ATG;rbs_motif=AGGAG(G)/GGAGG;rbs_spacer=13-15bp;gc_cont=0.492	SRVP_Atabeya-2_1555	SR-VP_11_27_2022_S1_100cm_MT	2	1554235	1554486	252	11625022	0.682709	arCOG04117	HdrA	Ferredoxin	C	COG2768	Uncharacterized_Fe-S_cluster_protein	S	-
SRVP_Atabeya-2-AMLJHBDE_15560	SRVP_Atabeya-2_1556 # 1554541 # 1554906 # -1 # ID=1_1556;partial=00;start_type=TTG;rbs_motif=AGxAGG/AGGxGG;rbs_spacer=5-10bp;gc_cont=0.432	SRVP_Atabeya-2_1556	SR-VP_11_27_2022_S1_100cm_MT	3	1554541	1554906	366	11625022	0.705093	-	-	-	-	-	-	-	-
SRVP_Atabeya-2-AMLJHBDE_15580	SRVP_Atabeya-2_1558 # 1555619 # 1556755 # -1 # ID=1_1558;partial=00;start_type=ATG;rbs_motif=GGA/GAG/AGG;rbs_spacer=11-12bp;gc_cont=0.485	SRVP_Atabeya-2_1558	SR-VP_11_27_2022_S1_100cm_MT	4	1555619	1556755	1137	11625022	0.302626	-	-	-	-	-	-	-	-
SRVP_Atabeya-2-AMLJHBDE_15590	SRVP_Atabeya-2_1559 # 1557450 # 1557653 # -1 # ID=1_1559;partial=00;start_type=ATG;rbs_motif=AGGAGG;rbs_spacer=5-10bp;gc_cont=0.475	SRVP_Atabeya-2_1559	SR-VP_11_27_2022_S1_100cm_MT	11	1557450	1557653	204	11625022	4.63841	arCOG04561	-	Flavin-binding_protein_dodecin	R	COG3360	Flavin-binding_protein_dodecin	R	-
SRVP_Atabeya-2-AMLJHBDE_15610	SRVP_Atabeya-2_1561 # 1558155 # 1559423 # 1 # ID=1_1561;partial=00;start_type=GTG;rbs_motif=None;rbs_spacer=None;gc_cont=0.459	SRVP_Atabeya-2_1561	SR-VP_11_27_2022_S1_100cm_MT	89	1558155	1559423	1269	11625022	6.03302	arCOG00130	-	MFS_family_permease	G	COG2271	Sugar_phosphate_permease	G	-
SRVP_Atabeya-2-AMLJHBDE_15630	SRVP_Atabeya-2_1563 # 1561455 # 1562198 # -1 # ID=1_1563;partial=00;start_type=TTG;rbs_motif=GGAG/GAGG;rbs_spacer=5-10bp;gc_cont=0.491	SRVP_Atabeya-2_1563	SR-VP_11_27_2022_S1_100cm_MT	1	1561455	1562198	744	11625022	0.11562	arCOG01705	DmrX	Dihydromethanopterin_reductase,_flavoprotein	H	COG1036	Archaeal_flavoprotein	C	-
SRVP_Atabeya-2-AMLJHBDE_15680	SRVP_Atabeya-2_1568 # 1564320 # 1565273 # -1 # ID=1_1568;partial=00;start_type=TTG;rbs_motif=GGA/GAG/AGG;rbs_spacer=11-12bp;gc_cont=0.453	SRVP_Atabeya-2_1568	SR-VP_11_27_2022_S2_40cm_MT	1	1564320	1565273	954	4025082	0.260422	arCOG04301	MptA	Fe(2+)-dependent_GTP_cyclohydrolase	H	COG1469	GTP_cyclohydrolase_FolE2	H	Folate_biosynthesis
SRVP_Atabeya-2-AMLJHBDE_15690	SRVP_Atabeya-2_1569 # 1565558 # 1567252 # -1 # ID=1_1569;partial=00;start_type=ATG;rbs_motif=3Base/5BMM;rbs_spacer=13-15bp;gc_cont=0.487	SRVP_Atabeya-2_1569	SR-VP_11_27_2022_S1_100cm_MT	11	1565558	1567252	1695	11625022	0.558251	arCOG00856	CaiC	Acyl-CoA_synthetase_(AMP-forming)/AMP-acid_ligase_II	I	COG0365	Acyl-coenzyme_A_synthetase/AMP-(fatty)_acid_ligase	I	-
SRVP_Atabeya-2-AMLJHBDE_15710	SRVP_Atabeya-2_1571 # 1568882 # 1569589 # -1 # ID=1_1571;partial=00;start_type=TTG;rbs_motif=GGAGG;rbs_spacer=5-10bp;gc_cont=0.456	SRVP_Atabeya-2_1571	SR-VP_11_27_2022_S1_100cm_MT	3	1568882	1569589	708	11625022	0.364497	arCOG00924	LivF	ABC-type_branched-chain_amino_acid_transport_system,_ATPase_component	E	COG0410	ABC-type_branched-chain_amino_acid_transport_system,_ATPase_component_LivF	E	-
SRVP_Atabeya-2-AMLJHBDE_15720	SRVP_Atabeya-2_1572 # 1569582 # 1570325 # -1 # ID=1_1572;partial=00;start_type=ATG;rbs_motif=None;rbs_spacer=None;gc_cont=0.487	SRVP_Atabeya-2_1572	SR-VP_11_27_2022_S1_100cm_MT	2	1569582	1570325	744	11625022	0.23124	arCOG00926	LivG	ABC-type_branched-chain_amino_acid_transport_system,_ATPase_component	E	COG0411	ABC-type_branched-chain_amino_acid_transport_system,_ATPase_component_LivG	E	-
SRVP_Atabeya-2-AMLJHBDE_15730	SRVP_Atabeya-2_1573 # 1570359 # 1571432 # -1 # ID=1_1573;partial=00;start_type=ATG;rbs_motif=GGA/GAG/AGG;rbs_spacer=5-10bp;gc_cont=0.494	SRVP_Atabeya-2_1573	SR-VP_11_27_2022_S1_100cm_MT	3	1570359	1571432	1074	11625022	0.240283	arCOG01274	LivM	ABC-type_branched-chain_amino_acid_transport_system,_permease_component	E	COG4177	ABC-type_branched-chain_amino_acid_transport_system,_permease_component	E	-
SRVP_Atabeya-2-AMLJHBDE_15740	SRVP_Atabeya-2_1574 # 1571497 # 1572366 # -1 # ID=1_1574;partial=00;start_type=TTG;rbs_motif=AGGAGG;rbs_spacer=5-10bp;gc_cont=0.487	SRVP_Atabeya-2_1574	SR-VP_11_27_2022_S1_100cm_MT	2	1571497	1572366	870	11625022	0.19775	arCOG01270	LivH	Branched-chain_amino_acid_ABC-type_transport_system,_permease_component	E	COG0559	Branched-chain_amino_acid_ABC-type_transport_system,_permease_component	E	-
SRVP_Atabeya-2-AMLJHBDE_15750	SRVP_Atabeya-2_1575 # 1572532 # 1573941 # -1 # ID=1_1575;partial=00;start_type=TTG;rbs_motif=GGA/GAG/AGG;rbs_spacer=11-12bp;gc_cont=0.488	SRVP_Atabeya-2_1575	SR-VP_11_27_2022_S1_100cm_MT	291	1572532	1573941	1410	11625022	17.7533	arCOG01020	LivK	ABC-type_branched-chain_amino_acid_transport_system,_periplasmic_component	E	COG0683	ABC-type_branched-chain_amino_acid_transport_system,_periplasmic_component	E	-
SRVP_Atabeya-2-AMLJHBDE_15760	SRVP_Atabeya-2_1576 # 1574487 # 1575182 # 1 # ID=1_1576;partial=00;start_type=ATG;rbs_motif=GGA/GAG/AGG;rbs_spacer=5-10bp;gc_cont=0.466	SRVP_Atabeya-2_1576	SR-VP_11_27_2022_S1_100cm_MT	2	1574487	1575182	696	11625022	0.247188	arCOG04458	-	Uncharacterized_protein_of_DIM6/NTAB_family	R	COG2457	Uncharacterized_conserved_protein,_DUF447_domain	S	-
SRVP_Atabeya-2-AMLJHBDE_15790	SRVP_Atabeya-2_1579 # 1577434 # 1578789 # -1 # ID=1_1579;partial=00;start_type=ATG;rbs_motif=AGGAG;rbs_spacer=5-10bp;gc_cont=0.470	SRVP_Atabeya-2_1579	SR-VP_11_27_2022_S1_100cm_MT	1	1577434	1578789	1356	11625022	0.0634376	arCOG04127	Grc3	Polynucleotide_5-kinase,_involved_in_rRNA_processing	J	COG1341	Polynucleotide_5'-kinase,_involved_in_rRNA_processing	J	-
SRVP_Atabeya-2-AMLJHBDE_15800	SRVP_Atabeya-2_1580 # 1578953 # 1581154 # -1 # ID=1_1580;partial=00;start_type=ATG;rbs_motif=GGAG/GAGG;rbs_spacer=5-10bp;gc_cont=0.478	SRVP_Atabeya-2_1580	SR-VP_11_27_2022_S1_100cm_MT	2	1578953	1581154	2202	11625022	0.0781302	arCOG00362	Srp102	Signal_recognition_particle_receptor_subunit_beta,_a_GTPase	U	COG2229	Signal_recognition_particle_receptor_subunit_beta,_a_GTPase	U	-
SRVP_Atabeya-2-AMLJHBDE_15840	SRVP_Atabeya-2_1584 # 1583817 # 1585826 # 1 # ID=1_1584;partial=00;start_type=ATG;rbs_motif=GGxGG;rbs_spacer=5-10bp;gc_cont=0.474	SRVP_Atabeya-2_1584	SR-VP_11_27_2022_S1_100cm_MT	6	1583817	1585826	2010	11625022	0.25678	arCOG02967	-	NACHT_family_NTPase_fused_to_HEAT_repeats_domain	T	COG2888	Predicted_RNA-binding_protein_involved_in_translation,_contains__Zn-ribbon_domain,_DUF1610_family	R	-
SRVP_Atabeya-2-AMLJHBDE_15860	SRVP_Atabeya-2_1586 # 1586786 # 1588444 # 1 # ID=1_1586;partial=00;start_type=ATG;rbs_motif=AGGAG/GGAGG;rbs_spacer=11-12bp;gc_cont=0.476	SRVP_Atabeya-2_1586	SR-VP_11_27_2022_S1_100cm_MT	2	1586786	1588444	1659	11625022	0.103703	arCOG00856	CaiC	Acyl-CoA_synthetase_(AMP-forming)/AMP-acid_ligase_II	I	COG0365	Acyl-coenzyme_A_synthetase/AMP-(fatty)_acid_ligase	I	-
SRVP_Atabeya-2-AMLJHBDE_15880	SRVP_Atabeya-2_1588 # 1588922 # 1589509 # -1 # ID=1_1588;partial=00;start_type=TTG;rbs_motif=GGAG/GAGG;rbs_spacer=5-10bp;gc_cont=0.481	SRVP_Atabeya-2_1588	SR-VP_11_27_2022_S1_100cm_MT	2	1588922	1589509	588	11625022	0.29259	arCOG00362	Srp102	Signal_recognition_particle_receptor_subunit_beta,_a_GTPase	U	COG2229	Signal_recognition_particle_receptor_subunit_beta,_a_GTPase	U	-
SRVP_Atabeya-2-AMLJHBDE_15910	SRVP_Atabeya-2_1591 # 1591319 # 1591909 # 1 # ID=1_1591;partial=00;start_type=ATG;rbs_motif=None;rbs_spacer=None;gc_cont=0.457	SRVP_Atabeya-2_1591	SR-VP_07_25_2022_A1_70cm_MT	1	1591319	1591909	591	125142	13.521	-	-	-	-	-	-	-	-
SRVP_Atabeya-2-AMLJHBDE_16010	SRVP_Atabeya-2_1601 # 1598139 # 1599476 # -1 # ID=1_1601;partial=00;start_type=ATG;rbs_motif=GGAG/GAGG;rbs_spacer=5-10bp;gc_cont=0.472	SRVP_Atabeya-2_1601	SR-VP_11_27_2022_S1_100cm_MT	6	1598139	1599476	1338	11625022	0.385746	arCOG06070	CelF	Alpha-galactosidase/6-phospho-beta-glucosidase,_family_4_of_glycosyl_hydrolase	G	COG1486	Alpha-galactosidase/6-phospho-beta-glucosidase,_family_4_of_glycosyl_hydrolase	G	-
SRVP_Atabeya-2-AMLJHBDE_16070	SRVP_Atabeya-2_1607 # 1603582 # 1604952 # -1 # ID=1_1607;partial=00;start_type=ATG;rbs_motif=GGAG/GAGG;rbs_spacer=5-10bp;gc_cont=0.480	SRVP_Atabeya-2_1607	SR-VP_11_27_2022_S1_100cm_MT	6	1603582	1604952	1371	11625022	0.376461	arCOG00132	-	MFS_family_permease	G	COG2270	MFS-type_transporter_involved_in_bile_tolerance,_Atg22_family	R	-
SRVP_Atabeya-2-AMLJHBDE_16150	SRVP_Atabeya-2_1615 # 1613749 # 1614111 # 1 # ID=1_1615;partial=00;start_type=ATG;rbs_motif=GGAG/GAGG;rbs_spacer=5-10bp;gc_cont=0.485	SRVP_Atabeya-2_1615	SR-VP_11_27_2022_S1_100cm_MT	4	1613749	1614111	363	11625022	0.947894	arCOG03769	-	Uncharacterized_membrane_protein	S	-	-	-	-
SRVP_Atabeya-2-AMLJHBDE_16160	SRVP_Atabeya-2_1616 # 1614294 # 1614659 # 1 # ID=1_1616;partial=00;start_type=TTG;rbs_motif=GGAGG;rbs_spacer=5-10bp;gc_cont=0.434	SRVP_Atabeya-2_1616	SR-VP_11_27_2022_S1_100cm_MT	11	1614294	1614659	366	11625022	2.58534	arCOG03769	-	Uncharacterized_membrane_protein	S	-	-	-	-
SRVP_Atabeya-2-AMLJHBDE_16190	SRVP_Atabeya-2_1619 # 1618340 # 1621420 # 1 # ID=1_1619;partial=00;start_type=TTG;rbs_motif=GGAG/GAGG;rbs_spacer=5-10bp;gc_cont=0.491	SRVP_Atabeya-2_1619	SR-VP_11_27_2022_S1_100cm_MT	321	1618340	1621420	3081	11625022	8.9623	arCOG00704	AprE	Surface_layer-associated_subtilisin-like_serine_protease	O	COG4934	Serine_protease,_subtilase_family	O	-
SRVP_Atabeya-2-AMLJHBDE_16190	SRVP_Atabeya-2_1619 # 1618340 # 1621420 # 1 # ID=1_1619;partial=00;start_type=TTG;rbs_motif=GGAG/GAGG;rbs_spacer=5-10bp;gc_cont=0.491	SRVP_Atabeya-2_1619	SR-VP_11_27_2022_S1_40cm_MT	1	1618340	1621420	3081	1473124	0.220328	arCOG00704	AprE	Surface_layer-associated_subtilisin-like_serine_protease	O	COG4934	Serine_protease,_subtilase_family	O	-
SRVP_Atabeya-2-AMLJHBDE_16200	SRVP_Atabeya-2_1620 # 1621781 # 1622653 # 1 # ID=1_1620;partial=00;start_type=TTG;rbs_motif=AGGA/GGAG/GAGG;rbs_spacer=11-12bp;gc_cont=0.459	SRVP_Atabeya-2_1620	SR-VP_11_27_2022_S1_100cm_MT	2	1621781	1622653	873	11625022	0.197071	-	-	-	-	-	-	-	-
SRVP_Atabeya-2-AMLJHBDE_16240	SRVP_Atabeya-2_1624 # 1626768 # 1627211 # -1 # ID=1_1624;partial=00;start_type=ATG;rbs_motif=AGGAG/GGAGG;rbs_spacer=11-12bp;gc_cont=0.498	SRVP_Atabeya-2_1624	SR-VP_11_27_2022_S1_100cm_MT	1	1626768	1627211	444	11625022	0.193742	arCOG01832	IbpA	Molecular_chaperone_(HSP20_family)	O	COG0071	Small_heat_shock_protein_IbpA,_HSP20_family	O	-
SRVP_Atabeya-2-AMLJHBDE_16260	SRVP_Atabeya-2_1626 # 1628466 # 1628855 # -1 # ID=1_1626;partial=00;start_type=GTG;rbs_motif=GGA/GAG/AGG;rbs_spacer=11-12bp;gc_cont=0.469	SRVP_Atabeya-2_1626	SR-VP_11_27_2022_S1_100cm_MT	6	1628466	1628855	390	11625022	1.32341	arCOG02600	CheY	Signal_transduction_regulator,_contains_Rec_and_HTH_domains	T	COG1733	DNA-binding_transcriptional_regulator,_HxlR_family	K	-
SRVP_Atabeya-2-AMLJHBDE_16280	SRVP_Atabeya-2_1628 # 1629361 # 1630290 # 1 # ID=1_1628;partial=00;start_type=ATG;rbs_motif=GGAG/GAGG;rbs_spacer=5-10bp;gc_cont=0.462	SRVP_Atabeya-2_1628	SR-VP_11_27_2022_S1_100cm_MT	1	1629361	1630290	930	11625022	0.0924961	arCOG00196	CcmA	ABC-type_multidrug_transport_system,_ATPase_component	V	COG4152	ABC-type_uncharacterized_transport_system,_ATPase_component	R	-
SRVP_Atabeya-2-AMLJHBDE_16330	SRVP_Atabeya-2_1633 # 1633988 # 1634518 # -1 # ID=1_1633;partial=00;start_type=ATG;rbs_motif=GGA/GAG/AGG;rbs_spacer=5-10bp;gc_cont=0.493	SRVP_Atabeya-2_1633	SR-VP_11_27_2022_S1_100cm_MT	1	1633988	1634518	531	11625022	0.161999	-	-	-	-	-	-	-	-
SRVP_Atabeya-2-AMLJHBDE_16340	SRVP_Atabeya-2_1634 # 1634862 # 1634999 # 1 # ID=1_1634;partial=00;start_type=ATG;rbs_motif=AGGAG/GGAGG;rbs_spacer=11-12bp;gc_cont=0.507	SRVP_Atabeya-2_1634	SR-VP_11_27_2022_S1_100cm_MT	2	1634862	1634999	138	11625022	1.24669	-	-	-	-	-	-	-	-
SRVP_Atabeya-2-AMLJHBDE_16350	SRVP_Atabeya-2_1635 # 1635134 # 1636627 # -1 # ID=1_1635;partial=00;start_type=ATG;rbs_motif=GGA/GAG/AGG;rbs_spacer=3-4bp;gc_cont=0.436	SRVP_Atabeya-2_1635	SR-VP_11_27_2022_S1_100cm_MT	4	1635134	1636627	1494	11625022	0.230311	arCOG01580	-	DNA-binding_transcriptional_regulator,_Lrp_family	K	COG1522	DNA-binding_transcriptional_regulator,_Lrp_family	K	-
SRVP_Atabeya-2-AMLJHBDE_16530	SRVP_Atabeya-2_1653 # 1652393 # 1653325 # -1 # ID=1_1653;partial=00;start_type=ATG;rbs_motif=AGGA/GGAG/GAGG;rbs_spacer=11-12bp;gc_cont=0.452	SRVP_Atabeya-2_1653	SR-VP_11_27_2022_S1_100cm_MT	4	1652393	1653325	933	11625022	0.368795	arCOG01472	-	Hemerythrin_HHE_cation_binding_domain_containing_protein	S	COG2461	Uncharacterized_conserved_protein_AF0170,_contains_SAB,_hemerythrin_HHE,_and_PAS_domains	R	-
SRVP_Atabeya-2-AMLJHBDE_16560	SRVP_Atabeya-2_1656 # 1655211 # 1655864 # -1 # ID=1_1656;partial=00;start_type=TTG;rbs_motif=GGA/GAG/AGG;rbs_spacer=5-10bp;gc_cont=0.471	SRVP_Atabeya-2_1656	SR-VP_11_27_2022_S1_80cm_MT	1	1655211	1655864	654	4000856	0.382181	-	-	-	-	-	-	-	-
SRVP_Atabeya-2-AMLJHBDE_16610	SRVP_Atabeya-2_1661 # 1657951 # 1658673 # 1 # ID=1_1661;partial=00;start_type=ATG;rbs_motif=None;rbs_spacer=None;gc_cont=0.444	SRVP_Atabeya-2_1661	SR-VP_11_27_2022_S1_100cm_MT	5	1657951	1658673	723	11625022	0.594892	-	-	-	-	-	-	-	-
SRVP_Atabeya-2-AMLJHBDE_16620	SRVP_Atabeya-2_1662 # 1658727 # 1658915 # -1 # ID=1_1662;partial=00;start_type=ATG;rbs_motif=GGA/GAG/AGG;rbs_spacer=5-10bp;gc_cont=0.434	SRVP_Atabeya-2_1662	SR-VP_11_27_2022_S1_100cm_MT	1	1658727	1658915	189	11625022	0.455139	-	-	-	-	-	-	-	-
SRVP_Atabeya-2-AMLJHBDE_16740	SRVP_Atabeya-2_1674 # 1669603 # 1670067 # -1 # ID=1_1674;partial=00;start_type=ATG;rbs_motif=GGA/GAG/AGG;rbs_spacer=11-12bp;gc_cont=0.449	SRVP_Atabeya-2_1674	SR-VP_11_27_2022_S1_100cm_MT	1	1669603	1670067	465	11625022	0.184992	-	-	-	-	-	-	-	-
SRVP_Atabeya-2-AMLJHBDE_16780	SRVP_Atabeya-2_1678 # 1673671 # 1674747 # 1 # ID=1_1678;partial=00;start_type=ATG;rbs_motif=GGA/GAG/AGG;rbs_spacer=5-10bp;gc_cont=0.494	SRVP_Atabeya-2_1678	SR-VP_11_27_2022_S1_100cm_MT	3	1673671	1674747	1077	11625022	0.239614	arCOG01163	LeuB	Isocitrate/isopropylmalate_dehydrogenase	C	COG0473	Isocitrate/isopropylmalate_dehydrogenase	CE	TCA_cycle
SRVP_Atabeya-2-AMLJHBDE_16880	SRVP_Atabeya-2_1688 # 1683568 # 1685421 # -1 # ID=1_1688;partial=00;start_type=ATG;rbs_motif=GGA/GAG/AGG;rbs_spacer=3-4bp;gc_cont=0.491	SRVP_Atabeya-2_1688	SR-VP_11_27_2022_S1_100cm_MT	6	1683568	1685421	1854	11625022	0.278386	arCOG01646	DAP2	Dipeptidyl_aminopeptidase/acylaminoacyl-peptidase	E	COG1506	Dipeptidyl_aminopeptidase/acylaminoacyl_peptidase	E	-
SRVP_Atabeya-2-AMLJHBDE_16910	SRVP_Atabeya-2_1691 # 1686196 # 1686765 # 1 # ID=1_1691;partial=00;start_type=ATG;rbs_motif=GGA/GAG/AGG;rbs_spacer=5-10bp;gc_cont=0.477	SRVP_Atabeya-2_1691	SR-VP_07_25_2022_A1_70cm_MT	1	1686196	1686765	570	125142	14.0192	arCOG00035	Dph6	Diphthamide_synthase_(EF-2-diphthine--ammonia_ligase)	J	COG2102	Diphthamide_synthase_(EF-2-diphthine--ammonia_ligase)	J	-
SRVP_Atabeya-2-AMLJHBDE_16940	SRVP_Atabeya-2_1694 # 1688698 # 1689438 # -1 # ID=1_1694;partial=00;start_type=ATG;rbs_motif=GGA/GAG/AGG;rbs_spacer=5-10bp;gc_cont=0.476	SRVP_Atabeya-2_1694	SR-VP_11_27_2022_S1_100cm_MT	1	1688698	1689438	741	11625022	0.116088	arCOG02291	-	HAD_superfamily_hydrolase	R	COG1011	FMN_and_5-amino-6-(5-phospho-D-ribitylamino)uracil_phosphatase_YigB,_HAD_superfamily_(riboflavin_biosynthesis)	H	-
SRVP_Atabeya-2-AMLJHBDE_16950	SRVP_Atabeya-2_1695 # 1689667 # 1689945 # -1 # ID=1_1695;partial=00;start_type=ATG;rbs_motif=GGA/GAG/AGG;rbs_spacer=5-10bp;gc_cont=0.477	SRVP_Atabeya-2_1695	SR-VP_11_27_2022_S1_100cm_MT	1	1689667	1689945	279	11625022	0.30832	-	-	-	-	-	-	-	-
SRVP_Atabeya-2-AMLJHBDE_16990	SRVP_Atabeya-2_1699 # 1692499 # 1693869 # 1 # ID=1_1699;partial=00;start_type=ATG;rbs_motif=GGxGG;rbs_spacer=3-4bp;gc_cont=0.495	SRVP_Atabeya-2_1699	SR-VP_11_27_2022_S1_60cm_MT	1	1692499	1693869	1371	1990488	0.36644	arCOG01474	MMT1	Predicted_Co/Zn/Cd_cation_transporter	P	COG0053	Divalent_metal_cation_(Fe/Co/Zn/Cd)_efflux_pump	P	-
SRVP_Atabeya-2-AMLJHBDE_17010	SRVP_Atabeya-2_1701 # 1694941 # 1695678 # -1 # ID=1_1701;partial=00;start_type=ATG;rbs_motif=AGGAGG;rbs_spacer=5-10bp;gc_cont=0.455	SRVP_Atabeya-2_1701	SR-VP_11_27_2022_S1_100cm_MT	10	1694941	1695678	738	11625022	1.1656	arCOG03177	MarR	Transcriptional_regulator,_MarR_family	K	COG4717	Uncharacterized_conserved_protein_YhaN,_contains_AAA_domain	S	-
SRVP_Atabeya-2-AMLJHBDE_17020	SRVP_Atabeya-2_1702 # 1695707 # 1696450 # -1 # ID=1_1702;partial=00;start_type=ATG;rbs_motif=AGGA/GGAG/GAGG;rbs_spacer=11-12bp;gc_cont=0.452	SRVP_Atabeya-2_1702	SR-VP_11_27_2022_S1_100cm_MT	10	1695707	1696450	744	11625022	1.1562	-	-	-	-	-	-	-	-
SRVP_Atabeya-2-AMLJHBDE_17070	SRVP_Atabeya-2_1707 # 1700742 # 1701197 # 1 # ID=1_1707;partial=00;start_type=ATG;rbs_motif=GGAG/GAGG;rbs_spacer=5-10bp;gc_cont=0.493	SRVP_Atabeya-2_1707	SR-VP_11_27_2022_S1_100cm_MT	1	1700742	1701197	456	11625022	0.188643	-	-	-	-	-	-	-	-
SRVP_Atabeya-2-AMLJHBDE_17080	SRVP_Atabeya-2_1708 # 1701573 # 1701755 # 1 # ID=1_1708;partial=00;start_type=TTG;rbs_motif=AGGAG/GGAGG;rbs_spacer=11-12bp;gc_cont=0.481	SRVP_Atabeya-2_1708	SR-VP_11_27_2022_S1_100cm_MT	7	1701573	1701755	183	11625022	3.29043	arCOG13405	-	Uncharacterized_protein	S	COG1594	DNA-directed_RNA_polymerase,_subunit_M/Transcription_elongation_factor_TFIIS	K	RNA_polymerase
SRVP_Atabeya-2-AMLJHBDE_17120	SRVP_Atabeya-2_1712 # 1704027 # 1705232 # -1 # ID=1_1712;partial=00;start_type=TTG;rbs_motif=4Base/6BMM;rbs_spacer=13-15bp;gc_cont=0.489	SRVP_Atabeya-2_1712	SR-VP_11_27_2022_S1_100cm_MT	2	1704027	1705232	1206	11625022	0.142656	arCOG00130	-	MFS_family_permease	G	COG2271	Sugar_phosphate_permease	G	-
SRVP_Atabeya-2-AMLJHBDE_17210	SRVP_Atabeya-2_1721 # 1712777 # 1714333 # -1 # ID=1_1721;partial=00;start_type=GTG;rbs_motif=AGGAG;rbs_spacer=5-10bp;gc_cont=0.457	SRVP_Atabeya-2_1721	SR-VP_11_27_2022_S1_100cm_MT	1	1712777	1714333	1557	11625022	0.0552481	arCOG00856	CaiC	Acyl-CoA_synthetase_(AMP-forming)/AMP-acid_ligase_II	I	COG0365	Acyl-coenzyme_A_synthetase/AMP-(fatty)_acid_ligase	I	-
SRVP_Atabeya-2-AMLJHBDE_17230	SRVP_Atabeya-2_1723 # 1714623 # 1715717 # -1 # ID=1_1723;partial=00;start_type=TTG;rbs_motif=GGAG/GAGG;rbs_spacer=5-10bp;gc_cont=0.471	SRVP_Atabeya-2_1723	SR-VP_11_27_2022_S1_100cm_MT	3	1714623	1715717	1095	11625022	0.235675	arCOG01622	MviM	Predicted_dehydrogenase	R	COG0673	Predicted_dehydrogenase	R	-
SRVP_Atabeya-2-AMLJHBDE_17250	SRVP_Atabeya-2_1725 # 1716629 # 1717387 # 1 # ID=1_1725;partial=00;start_type=ATG;rbs_motif=GGxGG;rbs_spacer=3-4bp;gc_cont=0.469	SRVP_Atabeya-2_1725	SR-VP_11_27_2022_S1_100cm_MT	8	1716629	1717387	759	11625022	0.906681	arCOG01648	MhpC	Alpha/beta_superfamily_hydrolase	R	COG1073	Fermentation-respiration_switch_esterase_FrsA,_DUF1100_family	T	-
SRVP_Atabeya-2-AMLJHBDE_17360	SRVP_Atabeya-2_1736 # 1725952 # 1726335 # 1 # ID=1_1736;partial=00;start_type=ATG;rbs_motif=GGAG/GAGG;rbs_spacer=5-10bp;gc_cont=0.500	SRVP_Atabeya-2_1736	SR-VP_11_27_2022_S1_100cm_MT	6	1725952	1726335	384	11625022	1.34408	arCOG02603	-	Roadblock/LC7_domain	R	COG2018	Predicted_regulator_of_Ras-like_GTPase_activity,_Roadblock/LC7/MglB_family	T	-
SRVP_Atabeya-2-AMLJHBDE_17380	SRVP_Atabeya-2_1738 # 1727473 # 1728153 # 1 # ID=1_1738;partial=00;start_type=ATG;rbs_motif=GGA/GAG/AGG;rbs_spacer=11-12bp;gc_cont=0.476	SRVP_Atabeya-2_1738	SR-VP_11_27_2022_S1_100cm_MT	1	1727473	1728153	681	11625022	0.126316	arCOG02189	NapF	HTH_containing_ranscriptional_regulator_fused_to_ferredoxin_domain	C	COG2221	Dissimilatory_sulfite_reductase_(desulfoviridin),_alpha_and_beta_subunits	P	-
SRVP_Atabeya-2-AMLJHBDE_17410	SRVP_Atabeya-2_1741 # 1730705 # 1731529 # 1 # ID=1_1741;partial=00;start_type=TTG;rbs_motif=GGAGG;rbs_spacer=5-10bp;gc_cont=0.521	SRVP_Atabeya-2_1741	SR-VP_11_27_2022_S1_100cm_MT	1	1730705	1731529	825	11625022	0.104268	-	-	-	-	-	-	-	-
SRVP_Atabeya-2-AMLJHBDE_17470	SRVP_Atabeya-2_1747 # 1736475 # 1737827 # -1 # ID=1_1747;partial=00;start_type=ATG;rbs_motif=None;rbs_spacer=None;gc_cont=0.459	SRVP_Atabeya-2_1747	SR-VP_11_27_2022_S1_100cm_MT	67	1736475	1737827	1353	11625022	4.25974	arCOG00146	MelB	Na+/melibiose_symporter_or_related_transporter	G	COG2211	Na+/melibiose_symporter_or_related_transporter	G	-
SRVP_Atabeya-2-AMLJHBDE_17490	SRVP_Atabeya-2_1749 # 1738674 # 1741079 # 1 # ID=1_1749;partial=00;start_type=TTG;rbs_motif=GGAGG;rbs_spacer=5-10bp;gc_cont=0.495	SRVP_Atabeya-2_1749	SR-VP_11_27_2022_S1_100cm_MT	1	1738674	1741079	2406	11625022	0.0357528	arCOG02236	HdrA	Heterodisulfide_reductase,_subunit_A_or_related_polyferredoxin	C	COG1145	Ferredoxin	C	-
SRVP_Atabeya-2-AMLJHBDE_17530	SRVP_Atabeya-2_1753 # 1742904 # 1743854 # -1 # ID=1_1753;partial=00;start_type=ATG;rbs_motif=GGA/GAG/AGG;rbs_spacer=5-10bp;gc_cont=0.466	SRVP_Atabeya-2_1753	SR-VP_11_27_2022_S1_100cm_MT	2	1742904	1743854	951	11625022	0.180907	arCOG01931	-	Predicted_metal-dependent_hydrolase_of_the_TIM-barrel_fold	R	COG2159	5-carboxyvanillate_decarboxylase_LigW_(lignin_degradation),_amidohydro_domain	G	-
SRVP_Atabeya-2-AMLJHBDE_17560	SRVP_Atabeya-2_1756 # 1746353 # 1747042 # -1 # ID=1_1756;partial=00;start_type=ATG;rbs_motif=4Base/6BMM;rbs_spacer=13-15bp;gc_cont=0.459	SRVP_Atabeya-2_1756	SR-VP_11_27_2022_S1_100cm_MT	1	1746353	1747042	690	11625022	0.124669	arCOG04291	-	Sugar_isomerase_related_protein	R	COG1801	Sugar_isomerase-related_protein_YecE,_UPF0759/DUF72_family	R	-
SRVP_Atabeya-2-AMLJHBDE_17570	SRVP_Atabeya-2_1757 # 1747054 # 1747701 # -1 # ID=1_1757;partial=00;start_type=ATG;rbs_motif=GGA/GAG/AGG;rbs_spacer=11-12bp;gc_cont=0.455	SRVP_Atabeya-2_1757	SR-VP_11_27_2022_S1_100cm_MT	9	1747054	1747701	648	11625022	1.19474	-	-	-	-	-	-	-	-
SRVP_Atabeya-2-AMLJHBDE_17600	SRVP_Atabeya-2_1760 # 1749724 # 1750620 # 1 # ID=1_1760;partial=00;start_type=TTG;rbs_motif=AGGAG/GGAGG;rbs_spacer=11-12bp;gc_cont=0.479	SRVP_Atabeya-2_1760	SR-VP_11_27_2022_S1_100cm_MT	4	1749724	1750620	897	11625022	0.383596	arCOG00833	RimI	Acetyltransferase_(GNAT)_family	R	COG3393	Predicted_acetyltransferase,_GNAT_family	R	-
SRVP_Atabeya-2-AMLJHBDE_17610	SRVP_Atabeya-2_1761 # 1750745 # 1751695 # 1 # ID=1_1761;partial=00;start_type=ATG;rbs_motif=GGAG/GAGG;rbs_spacer=5-10bp;gc_cont=0.471	SRVP_Atabeya-2_1761	SR-VP_11_27_2022_S1_100cm_MT	4	1750745	1751695	951	11625022	0.361814	arCOG00014	RbsK	Sugar_kinase,_ribokinase_family	G	COG0524	Sugar_or_nucleoside_kinase,_ribokinase_family	G	Glycolysis
SRVP_Atabeya-2-AMLJHBDE_17620	SRVP_Atabeya-2_1762 # 1751825 # 1752517 # 1 # ID=1_1762;partial=00;start_type=TTG;rbs_motif=GGA/GAG/AGG;rbs_spacer=5-10bp;gc_cont=0.514	SRVP_Atabeya-2_1762	SR-VP_11_27_2022_S1_100cm_MT	13	1751825	1752517	693	11625022	1.61368	arCOG04741	-	Zn_finger_protein	S	COG2888	Predicted_RNA-binding_protein_involved_in_translation,_contains__Zn-ribbon_domain,_DUF1610_family	R	-
SRVP_Atabeya-2-AMLJHBDE_17660	SRVP_Atabeya-2_1766 # 1755176 # 1757158 # 1 # ID=1_1766;partial=00;start_type=TTG;rbs_motif=GGA/GAG/AGG;rbs_spacer=5-10bp;gc_cont=0.492	SRVP_Atabeya-2_1766	SR-VP_11_27_2022_S1_100cm_MT	21	1755176	1757158	1983	11625022	0.910967	-	-	-	-	-	-	-	-
SRVP_Atabeya-2-AMLJHBDE_17760	SRVP_Atabeya-2_1776 # 1766348 # 1767223 # -1 # ID=1_1776;partial=00;start_type=GTG;rbs_motif=AGGAGG;rbs_spacer=5-10bp;gc_cont=0.502	SRVP_Atabeya-2_1776	SR-VP_11_27_2022_S1_100cm_MT	2	1766348	1767223	876	11625022	0.196396	arCOG05195	-	TPR_repeats_containing_protein	R	COG4785	Lipoprotein_NlpI,_contains_TPR_repeats	M	-
SRVP_Atabeya-2-AMLJHBDE_17820	SRVP_Atabeya-2_1782 # 1772511 # 1772939 # -1 # ID=1_1782;partial=00;start_type=ATG;rbs_motif=4Base/6BMM;rbs_spacer=13-15bp;gc_cont=0.497	SRVP_Atabeya-2_1782	SR-VP_11_27_2022_S1_100cm_MT	2	1772511	1772939	429	11625022	0.401032	-	-	-	-	-	-	-	-
SRVP_Atabeya-2-AMLJHBDE_17860	SRVP_Atabeya-2_1786 # 1775352 # 1776092 # -1 # ID=1_1786;partial=00;start_type=GTG;rbs_motif=GGxGG;rbs_spacer=5-10bp;gc_cont=0.474	SRVP_Atabeya-2_1786	SR-VP_11_27_2022_S1_100cm_MT	2	1775352	1776092	741	11625022	0.232176	-	-	-	-	COG1378	Sugar-specific_transcriptional_regulator_TrmB	K	-
SRVP_Atabeya-2-AMLJHBDE_17950	SRVP_Atabeya-2_1795 # 1782660 # 1782809 # 1 # ID=1_1795;partial=00;start_type=ATG;rbs_motif=GGA/GAG/AGG;rbs_spacer=5-10bp;gc_cont=0.400	SRVP_Atabeya-2_1795	SR-VP_11_27_2022_S1_100cm_MT	9	1782660	1782809	150	11625022	5.16128	arCOG04467	-	Uncharacterized_protein	S	-	-	-	-
SRVP_Atabeya-2-AMLJHBDE_17960	SRVP_Atabeya-2_1796 # 1782911 # 1783456 # -1 # ID=1_1796;partial=00;start_type=ATG;rbs_motif=AGGAGG;rbs_spacer=5-10bp;gc_cont=0.491	SRVP_Atabeya-2_1796	SR-VP_11_27_2022_S1_100cm_MT	9	1782911	1783456	546	11625022	1.41793	arCOG01100	-	Ferredoxin-thioredoxin_reductase,_catalytic_subunit_fused_to_rubrerythrin	C	COG4802	Ferredoxin-thioredoxin_reductase,_catalytic_subunit	C	-
SRVP_Atabeya-2-AMLJHBDE_18000	SRVP_Atabeya-2_1800 # 1786363 # 1787256 # 1 # ID=1_1800;partial=00;start_type=TTG;rbs_motif=GGA/GAG/AGG;rbs_spacer=5-10bp;gc_cont=0.473	SRVP_Atabeya-2_1800	SR-VP_11_27_2022_S1_100cm_MT	3	1786363	1787256	894	11625022	0.288662	-	-	-	-	COG0697	Permease_of_the_drug/metabolite_transporter_(DMT)_superfamily	GER	-
SRVP_Atabeya-2-AMLJHBDE_18050	SRVP_Atabeya-2_1805 # 1793071 # 1795050 # 1 # ID=1_1805;partial=00;start_type=ATG;rbs_motif=None;rbs_spacer=None;gc_cont=0.469	SRVP_Atabeya-2_1805	SR-VP_11_27_2022_S1_60cm_MT	1	1793071	1795050	1980	1990488	0.253732	arCOG03045	-	TPR_repeats_containing_protein,_fused_to_putative_immunity_protein,_associated_with_polymorphic_toxin_loci	V	COG3903	Predicted_ATPase	R	-
SRVP_Atabeya-2-AMLJHBDE_18060	SRVP_Atabeya-2_1806 # 1795045 # 1797324 # -1 # ID=1_1806;partial=00;start_type=ATG;rbs_motif=GGAGG;rbs_spacer=5-10bp;gc_cont=0.483	SRVP_Atabeya-2_1806	SR-VP_11_27_2022_S1_100cm_MT	4	1795045	1797324	2280	11625022	0.150915	arCOG03287	GDB1	Glycogen_debranching_enzyme	G	COG1626	Neutral_trehalase	G	-
SRVP_Atabeya-2-AMLJHBDE_18070	SRVP_Atabeya-2_1807 # 1797565 # 1798149 # 1 # ID=1_1807;partial=00;start_type=TTG;rbs_motif=GGxGG;rbs_spacer=5-10bp;gc_cont=0.460	SRVP_Atabeya-2_1807	SR-VP_11_27_2022_S1_60cm_MT	1	1797565	1798149	585	1990488	0.858785	-	-	-	-	-	-	-	-
SRVP_Atabeya-2-AMLJHBDE_18090	SRVP_Atabeya-2_1809 # 1800305 # 1801348 # 1 # ID=1_1809;partial=00;start_type=TTG;rbs_motif=AGGA/GGAG/GAGG;rbs_spacer=11-12bp;gc_cont=0.475	SRVP_Atabeya-2_1809	SR-VP_11_27_2022_S1_100cm_MT	1	1800305	1801348	1044	11625022	0.0823959	arCOG05128	NapF	Ferredoxin	C	COG1139	L-lactate_utilization_protein_LutB,_contains_a_ferredoxin-type_domain	C	-
SRVP_Atabeya-2-AMLJHBDE_18100	SRVP_Atabeya-2_1810 # 1801345 # 1802208 # 1 # ID=1_1810;partial=00;start_type=ATG;rbs_motif=AGGAG(G)/GGAGG;rbs_spacer=13-15bp;gc_cont=0.492	SRVP_Atabeya-2_1810	SR-VP_11_27_2022_S1_100cm_MT	3	1801345	1802208	864	11625022	0.298685	arCOG02199	Mcr1	NAD(P)H-flavin_reductase	H	COG0543	NAD(P)H-flavin_reductase	HC	-
SRVP_Atabeya-2-AMLJHBDE_18110	SRVP_Atabeya-2_1811 # 1802237 # 1803040 # 1 # ID=1_1811;partial=00;start_type=ATG;rbs_motif=GGAGG;rbs_spacer=5-10bp;gc_cont=0.489	SRVP_Atabeya-2_1811	SR-VP_11_27_2022_S1_100cm_MT	1	1802237	1803040	804	11625022	0.106992	arCOG02472	FrhG	Coenzyme_F420-reducing_hydrogenase,_gamma_subunit	C	COG1941	Coenzyme_F420-reducing_hydrogenase,_gamma_subunit	C	-
SRVP_Atabeya-2-AMLJHBDE_18120	SRVP_Atabeya-2_1812 # 1803305 # 1804624 # 1 # ID=1_1812;partial=00;start_type=GTG;rbs_motif=GGxGG;rbs_spacer=5-10bp;gc_cont=0.489	SRVP_Atabeya-2_1812	SR-VP_11_27_2022_S1_100cm_MT	2	1803305	1804624	1320	11625022	0.130335	arCOG01549	FrhA	Coenzyme_F420-reducing_hydrogenase,_alpha_subunit	C	COG3261	Ni,Fe-hydrogenase_III_large_subunit	C	-
SRVP_Atabeya-2-AMLJHBDE_18170	SRVP_Atabeya-2_1817 # 1809878 # 1810657 # -1 # ID=1_1817;partial=00;start_type=TTG;rbs_motif=GGA/GAG/AGG;rbs_spacer=11-12bp;gc_cont=0.446	SRVP_Atabeya-2_1817	SR-VP_11_27_2022_S1_100cm_MT	2	1809878	1810657	780	11625022	0.220568	-	-	-	-	-	-	-	-
SRVP_Atabeya-2-AMLJHBDE_18180	SRVP_Atabeya-2_1818 # 1810719 # 1811111 # -1 # ID=1_1818;partial=00;start_type=ATG;rbs_motif=AGGAG;rbs_spacer=5-10bp;gc_cont=0.453	SRVP_Atabeya-2_1818	SR-VP_11_27_2022_S1_100cm_MT	1	1810719	1811111	393	11625022	0.218884	-	-	-	-	-	-	-	-
SRVP_Atabeya-2-AMLJHBDE_18300	SRVP_Atabeya-2_1830 # 1820739 # 1821539 # -1 # ID=1_1830;partial=00;start_type=TTG;rbs_motif=GGA/GAG/AGG;rbs_spacer=5-10bp;gc_cont=0.507	SRVP_Atabeya-2_1830	SR-VP_11_27_2022_S1_100cm_MT	2	1820739	1821539	801	11625022	0.214785	arCOG02714	CofE	F(420)-0:gamma-glutamyl_ligase,_F420_coenzyme_biosynthesis_enzyme	H	COG1478	F420-0:Gamma-glutamyl_ligase_(F420_biosynthesis)	H	-
SRVP_Atabeya-2-AMLJHBDE_18310	SRVP_Atabeya-2_1831 # 1821783 # 1822253 # 1 # ID=1_1831;partial=00;start_type=ATG;rbs_motif=4Base/6BMM;rbs_spacer=13-15bp;gc_cont=0.476	SRVP_Atabeya-2_1831	SR-VP_11_27_2022_S1_100cm_MT	1	1821783	1822253	471	11625022	0.182636	-	-	-	-	-	-	-	-
SRVP_Atabeya-2-AMLJHBDE_18330	SRVP_Atabeya-2_1833 # 1822980 # 1823945 # 1 # ID=1_1833;partial=00;start_type=ATG;rbs_motif=GGA/GAG/AGG;rbs_spacer=5-10bp;gc_cont=0.463	SRVP_Atabeya-2_1833	SR-VP_11_27_2022_S1_100cm_MT	4	1822980	1823945	966	11625022	0.356196	arCOG00087	GuaA	GMP_synthase_-_Glutamine_amidotransferase_domain	F	COG0519	GMP_synthase,_PP-ATPase_domain/subunit	F	Purine_biosynthesis
SRVP_Atabeya-2-AMLJHBDE_18350	SRVP_Atabeya-2_1835 # 1824741 # 1825382 # -1 # ID=1_1835;partial=00;start_type=TTG;rbs_motif=GGA/GAG/AGG;rbs_spacer=5-10bp;gc_cont=0.461	SRVP_Atabeya-2_1835	SR-VP_11_27_2022_S1_100cm_MT	3	1824741	1825382	642	11625022	0.401969	-	-	-	-	-	-	-	-
SRVP_Atabeya-2-AMLJHBDE_18360	SRVP_Atabeya-2_1836 # 1825388 # 1826977 # -1 # ID=1_1836;partial=00;start_type=TTG;rbs_motif=AGGAG;rbs_spacer=5-10bp;gc_cont=0.491	SRVP_Atabeya-2_1836	SR-VP_11_27_2022_S1_100cm_MT	292	1825388	1826977	1590	11625022	15.7976	arCOG03462	PotE	Amino_acid_transporter	E	COG0531	Serine_transporter_YbeC,_amino_acid:H+_symporter_family	E	-
SRVP_Atabeya-2-AMLJHBDE_18390	SRVP_Atabeya-2_1839 # 1829041 # 1829847 # -1 # ID=1_1839;partial=00;start_type=ATG;rbs_motif=GGAG/GAGG;rbs_spacer=5-10bp;gc_cont=0.492	SRVP_Atabeya-2_1839	SR-VP_11_27_2022_S1_100cm_MT	4	1829041	1829847	807	11625022	0.426376	-	-	-	-	COG2888	Predicted_RNA-binding_protein_involved_in_translation,_contains__Zn-ribbon_domain,_DUF1610_family	R	-
SRVP_Atabeya-2-AMLJHBDE_18420	SRVP_Atabeya-2_1842 # 1831404 # 1832318 # -1 # ID=1_1842;partial=00;start_type=ATG;rbs_motif=AGxAGG/AGGxGG;rbs_spacer=5-10bp;gc_cont=0.498	SRVP_Atabeya-2_1842	SR-VP_11_27_2022_S1_100cm_MT	1	1831404	1832318	915	11625022	0.0940124	arCOG02935	-	Pirin-related_protein	R	COG1741	Redox-sensitive_bicupin_YhaK,_pirin_superfamily	R	-
SRVP_Atabeya-2-AMLJHBDE_18440	SRVP_Atabeya-2_1844 # 1832844 # 1834220 # -1 # ID=1_1844;partial=00;start_type=ATG;rbs_motif=GGAGG;rbs_spacer=5-10bp;gc_cont=0.497	SRVP_Atabeya-2_1844	SR-VP_11_27_2022_S1_100cm_MT	1	1832844	1834220	1377	11625022	0.0624701	arCOG00322	TldE	Inactivated_Zn-dependent_protease,_component_of_TldD/TldE_system	O	COG0312	Zn-dependent_protease_PmbA/TldA_or_its_inactivated_homolog	R	-
SRVP_Atabeya-2-AMLJHBDE_18480	SRVP_Atabeya-2_1848 # 1837094 # 1838038 # -1 # ID=1_1848;partial=00;start_type=ATG;rbs_motif=GGAGG;rbs_spacer=5-10bp;gc_cont=0.476	SRVP_Atabeya-2_1848	SR-VP_11_27_2022_S1_100cm_MT	2	1837094	1838038	945	11625022	0.182056	arCOG01803	TauA	ABC-type_nitrate/sulfonate/bicarbonate_transport_system,_periplasmic_component	P	COG4521	ABC-type_taurine_transport_system,_periplasmic_component	P	-
SRVP_Atabeya-2-AMLJHBDE_18550	SRVP_Atabeya-2_1855 # 1844602 # 1845447 # 1 # ID=1_1855;partial=00;start_type=ATG;rbs_motif=GGA/GAG/AGG;rbs_spacer=11-12bp;gc_cont=0.466	SRVP_Atabeya-2_1855	SR-VP_11_27_2022_S1_100cm_MT	4	1844602	1845447	846	11625022	0.40672	arCOG01091	CCC1	Predicted_Fe2+/Mn2+_transporter,_VIT1/CCC1_family	P	COG1814	Predicted_Fe2+/Mn2+_transporter,_VIT1/CCC1_family	P	-
SRVP_Atabeya-2-AMLJHBDE_18570	SRVP_Atabeya-2_1857 # 1846458 # 1847435 # -1 # ID=1_1857;partial=00;start_type=TTG;rbs_motif=AGGAG(G)/GGAGG;rbs_spacer=13-15bp;gc_cont=0.471	SRVP_Atabeya-2_1857	SR-VP_11_27_2022_S1_100cm_MT	4	1846458	1847435	978	11625022	0.351826	-	-	-	-	-	-	-	-
SRVP_Atabeya-2-AMLJHBDE_18630	SRVP_Atabeya-2_1863 # 1850011 # 1851081 # -1 # ID=1_1863;partial=00;start_type=ATG;rbs_motif=GGA/GAG/AGG;rbs_spacer=5-10bp;gc_cont=0.473	SRVP_Atabeya-2_1863	SR-VP_11_27_2022_S1_100cm_MT	2	1850011	1851081	1071	11625022	0.160637	arCOG00196	CcmA	ABC-type_multidrug_transport_system,_ATPase_component	V	COG4152	ABC-type_uncharacterized_transport_system,_ATPase_component	R	-
SRVP_Atabeya-2-AMLJHBDE_18770	SRVP_Atabeya-2_1877 # 1858354 # 1858809 # 1 # ID=1_1877;partial=00;start_type=GTG;rbs_motif=GGxGG;rbs_spacer=5-10bp;gc_cont=0.478	SRVP_Atabeya-2_1877	SR-VP_11_27_2022_S1_100cm_MT	11	1858354	1858809	456	11625022	2.07508	arCOG03571	-	Uncharacterized_protein,_DUF3795_family	S	-	-	-	-
SRVP_Atabeya-2-AMLJHBDE_18820	SRVP_Atabeya-2_1882 # 1861628 # 1861960 # 1 # ID=1_1882;partial=00;start_type=ATG;rbs_motif=AGGAGG;rbs_spacer=11-12bp;gc_cont=0.414	SRVP_Atabeya-2_1882	SR-VP_11_27_2022_S1_100cm_MT	13	1861628	1861960	333	11625022	3.35819	arCOG10940	-	Uncharacterized_membrane_protein	S	-	-	-	-
SRVP_Atabeya-2-AMLJHBDE_18890	SRVP_Atabeya-2_1889 # 1864373 # 1864849 # -1 # ID=1_1889;partial=00;start_type=ATG;rbs_motif=GGAG/GAGG;rbs_spacer=5-10bp;gc_cont=0.484	SRVP_Atabeya-2_1889	SR-VP_11_27_2022_S1_100cm_MT	2	1864373	1864849	477	11625022	0.360676	-	-	-	-	-	-	-	-
SRVP_Atabeya-2-AMLJHBDE_18930	SRVP_Atabeya-2_1893 # 1867658 # 1870240 # -1 # ID=1_1893;partial=00;start_type=ATG;rbs_motif=GGA/GAG/AGG;rbs_spacer=11-12bp;gc_cont=0.469	SRVP_Atabeya-2_1893	SR-VP_11_27_2022_S1_100cm_MT	7	1867658	1870240	2583	11625022	0.23312	arCOG03661	AMS1	Alpha-mannosidase	G	COG0383	Alpha-mannosidase	G	-
SRVP_Atabeya-2-AMLJHBDE_18970	SRVP_Atabeya-2_1897 # 1873320 # 1875575 # -1 # ID=1_1897;partial=00;start_type=TTG;rbs_motif=GGAGG;rbs_spacer=5-10bp;gc_cont=0.498	SRVP_Atabeya-2_1897	SR-VP_11_27_2022_S1_100cm_MT	125	1873320	1875575	2256	11625022	4.76625	arCOG01314	-	Uncharacterized_membrane_anchored_protein_with_extracellular_flavodoxin-like_domain,_a_component_of_a_putative_secretion_system	S	COG3225	ABC-type_uncharacterized_transport_system_involved_in_gliding_motility,_auxiliary_component	N	-
SRVP_Atabeya-2-AMLJHBDE_19020	SRVP_Atabeya-2_1902 # 1878094 # 1878483 # 1 # ID=1_1902;partial=00;start_type=ATG;rbs_motif=GGxGG;rbs_spacer=5-10bp;gc_cont=0.436	SRVP_Atabeya-2_1902	SR-VP_11_27_2022_S1_100cm_MT	17	1878094	1878483	390	11625022	3.74965	-	-	-	-	-	-	-	-
SRVP_Atabeya-2-AMLJHBDE_19030	SRVP_Atabeya-2_1903 # 1878511 # 1880016 # 1 # ID=1_1903;partial=00;start_type=ATG;rbs_motif=AGGAG(G)/GGAGG;rbs_spacer=13-15bp;gc_cont=0.475	SRVP_Atabeya-2_1903	SR-VP_11_27_2022_S1_100cm_MT	11	1878511	1880016	1506	11625022	0.62831	-	-	-	-	-	-	-	-
SRVP_Atabeya-2-AMLJHBDE_19080	SRVP_Atabeya-2_1908 # 1883311 # 1885104 # -1 # ID=1_1908;partial=00;start_type=TTG;rbs_motif=AGGAG;rbs_spacer=3-4bp;gc_cont=0.467	SRVP_Atabeya-2_1908	SR-VP_11_27_2022_S1_100cm_MT	2	1883311	1885104	1794	11625022	0.0958989	arCOG00810	MetG	Methionyl-tRNA_synthetase	J	COG0143	Methionyl-tRNA_synthetase	J	Aminoacyl-tRNA_synthetases
SRVP_Atabeya-2-AMLJHBDE_19130	SRVP_Atabeya-2_1913 # 1889577 # 1891406 # 1 # ID=1_1913;partial=00;start_type=ATG;rbs_motif=AGGA/GGAG/GAGG;rbs_spacer=11-12bp;gc_cont=0.483	SRVP_Atabeya-2_1913	SR-VP_11_27_2022_S1_100cm_MT	1	1889577	1891406	1830	11625022	0.0470062	arCOG00280	-	HerA_helicase	L	COG0433	Archaeal_DNA_helicase_HerA_or_a_related_bacterial_ATPase,_contains_HAS-barrel_and_ATPase_domains	L	-
SRVP_Atabeya-2-AMLJHBDE_19150	SRVP_Atabeya-2_1915 # 1892399 # 1893280 # 1 # ID=1_1915;partial=00;start_type=ATG;rbs_motif=GGA/GAG/AGG;rbs_spacer=5-10bp;gc_cont=0.450	SRVP_Atabeya-2_1915	SR-VP_11_27_2022_S1_100cm_MT	2	1892399	1893280	882	11625022	0.19506	-	-	-	-	-	-	-	-
SRVP_Atabeya-2-AMLJHBDE_19170	SRVP_Atabeya-2_1917 # 1894719 # 1895294 # -1 # ID=1_1917;partial=00;start_type=ATG;rbs_motif=GGxGG;rbs_spacer=5-10bp;gc_cont=0.450	SRVP_Atabeya-2_1917	SR-VP_11_27_2022_S1_100cm_MT	1	1894719	1895294	576	11625022	0.149343	arCOG02586	-	Fe-S-cluster_containining_protein	R	COG0727	Uncharacterized_protein_YkgJ,_contains_CxxCxxCC_motif	R	-
SRVP_Atabeya-2-AMLJHBDE_19180	SRVP_Atabeya-2_1918 # 1895320 # 1896429 # -1 # ID=1_1918;partial=00;start_type=ATG;rbs_motif=None;rbs_spacer=None;gc_cont=0.456	SRVP_Atabeya-2_1918	SR-VP_11_27_2022_S1_100cm_MT	9	1895320	1896429	1110	11625022	0.69747	arCOG02723	-	Glutamate-cysteine_ligase_family_2	H	COG2170	Gamma-glutamyl:cysteine_ligase_YbdK,_ATP-grasp_superfamily	O	-
SRVP_Atabeya-2-AMLJHBDE_19360	SRVP_Atabeya-2_1936 # 1912376 # 1913299 # 1 # ID=1_1936;partial=00;start_type=TTG;rbs_motif=GGAGG;rbs_spacer=5-10bp;gc_cont=0.465	SRVP_Atabeya-2_1936	SR-VP_11_27_2022_S1_100cm_MT	2	1912376	1913299	924	11625022	0.186193	arCOG04336	MtrH	Tetrahydromethanopterin_S-methyltransferase,_subunit_H	H	COG1962	Tetrahydromethanopterin_S-methyltransferase,_subunit_H	H	-
SRVP_Atabeya-2-AMLJHBDE_19390	SRVP_Atabeya-2_1939 # 1915044 # 1916312 # 1 # ID=1_1939;partial=00;start_type=ATG;rbs_motif=AGGAG/GGAGG;rbs_spacer=11-12bp;gc_cont=0.474	SRVP_Atabeya-2_1939	SR-VP_11_27_2022_S1_100cm_MT	4	1915044	1916312	1269	11625022	0.271147	arCOG11398	-	Peptidase_family_C39	E	COG4990	Predicted_cysteine_peptidase,_C39_family	R	-
SRVP_Atabeya-2-AMLJHBDE_19410	SRVP_Atabeya-2_1941 # 1917106 # 1917870 # -1 # ID=1_1941;partial=00;start_type=TTG;rbs_motif=GGxGG;rbs_spacer=5-10bp;gc_cont=0.488	SRVP_Atabeya-2_1941	SR-VP_11_27_2022_S1_80cm_MT	1	1917106	1917870	765	4000856	0.326727	arCOG01638	-	SAM-dependent_methyltransferase	Q	COG4106	Trans-aconitate_methyltransferase	C	-
SRVP_Atabeya-2-AMLJHBDE_19420	SRVP_Atabeya-2_1942 # 1918597 # 1919298 # 1 # ID=1_1942;partial=00;start_type=TTG;rbs_motif=GGA/GAG/AGG;rbs_spacer=5-10bp;gc_cont=0.479	SRVP_Atabeya-2_1942	SR-VP_11_27_2022_S1_100cm_MT	1	1918597	1919298	702	11625022	0.122538	arCOG03672	-	Thermopsin-like_protease	E	COG2888	Predicted_RNA-binding_protein_involved_in_translation,_contains__Zn-ribbon_domain,_DUF1610_family	R	-
SRVP_Atabeya-2-AMLJHBDE_19430	SRVP_Atabeya-2_1943 # 1919419 # 1920225 # -1 # ID=1_1943;partial=00;start_type=ATG;rbs_motif=AGxAGG/AGGxGG;rbs_spacer=5-10bp;gc_cont=0.482	SRVP_Atabeya-2_1943	SR-VP_11_27_2022_S1_100cm_MT	2	1919419	1920225	807	11625022	0.213188	arCOG01730	-	Aromatic_ring-opening_dioxygenase,_catalytic_LigB_subunit_related_enzyme	Q	COG3384	Aromatic_ring-opening_dioxygenase,_catalytic_subunit,_LigB_family	Q	-
SRVP_Atabeya-2-AMLJHBDE_19490	SRVP_Atabeya-2_1949 # 1923571 # 1924335 # 1 # ID=1_1949;partial=00;start_type=TTG;rbs_motif=GGAG/GAGG;rbs_spacer=5-10bp;gc_cont=0.481	SRVP_Atabeya-2_1949	SR-VP_11_27_2022_S1_100cm_MT	5	1923571	1924335	765	11625022	0.562231	arCOG07015	-	Uncharacterized_membrane_protein	S	-	-	-	-
SRVP_Atabeya-2-AMLJHBDE_19730	SRVP_Atabeya-2_1973 # 1946802 # 1947335 # -1 # ID=1_1973;partial=00;start_type=ATG;rbs_motif=AGGAG/GGAGG;rbs_spacer=11-12bp;gc_cont=0.463	SRVP_Atabeya-2_1973	SR-VP_11_27_2022_S1_100cm_MT	4	1946802	1947335	534	11625022	0.644355	arCOG04361	-	Predicted_metal-binding_protein	S	COG5423	Predicted_metal-binding_protein	S	-
SRVP_Atabeya-2-AMLJHBDE_19760	SRVP_Atabeya-2_1976 # 1949319 # 1950485 # 1 # ID=1_1976;partial=00;start_type=ATG;rbs_motif=GGAG/GAGG;rbs_spacer=5-10bp;gc_cont=0.465	SRVP_Atabeya-2_1976	SR-VP_11_27_2022_S1_100cm_MT	2	1949319	1950485	1167	11625022	0.147423	arCOG01000	PepP	Xaa-Pro_aminopeptidase	E	COG0006	Xaa-Pro_aminopeptidase	E	-
SRVP_Atabeya-2-AMLJHBDE_19770	SRVP_Atabeya-2_1977 # 1950691 # 1951629 # 1 # ID=1_1977;partial=00;start_type=TTG;rbs_motif=GGA/GAG/AGG;rbs_spacer=5-10bp;gc_cont=0.498	SRVP_Atabeya-2_1977	SR-VP_11_27_2022_S1_100cm_MT	1568	1950691	1951629	939	11625022	143.644	-	-	-	-	-	-	-	-
SRVP_Atabeya-2-AMLJHBDE_19830	SRVP_Atabeya-2_1983 # 1956438 # 1958633 # -1 # ID=1_1983;partial=00;start_type=ATG;rbs_motif=GGA/GAG/AGG;rbs_spacer=5-10bp;gc_cont=0.521	SRVP_Atabeya-2_1983	SR-VP_11_27_2022_S1_100cm_MT	4	1956438	1958633	2196	11625022	0.156687	-	-	-	-	COG0613	5'-3'_exoribonuclease_TrpH/YciV_(RNase_AM),_contains_PHP_domain	F	-
SRVP_Atabeya-2-AMLJHBDE_19850	SRVP_Atabeya-2_1985 # 1959368 # 1960678 # -1 # ID=1_1985;partial=00;start_type=ATG;rbs_motif=None;rbs_spacer=None;gc_cont=0.468	SRVP_Atabeya-2_1985	SR-VP_11_27_2022_S1_100cm_MT	2	1959368	1960678	1311	11625022	0.13123	arCOG02046	-	Nickel-dependent_lactate_racemase	C	COG3875	Nickel-dependent_lactate_racemase	M	-
SRVP_Atabeya-2-AMLJHBDE_19870	SRVP_Atabeya-2_1987 # 1961469 # 1963376 # -1 # ID=1_1987;partial=00;start_type=ATG;rbs_motif=AGGAGG;rbs_spacer=11-12bp;gc_cont=0.491	SRVP_Atabeya-2_1987	SR-VP_11_27_2022_S1_100cm_MT	10	1961469	1963376	1908	11625022	0.450846	arCOG00706	gor	Aldehyde:ferredoxin_oxidoreductase	C	COG2414	Aldehyde:ferredoxin_oxidoreductase	C	-
SRVP_Atabeya-2-AMLJHBDE_19880	SRVP_Atabeya-2_1988 # 1963572 # 1964981 # 1 # ID=1_1988;partial=00;start_type=TTG;rbs_motif=AGGAGG;rbs_spacer=11-12bp;gc_cont=0.494	SRVP_Atabeya-2_1988	SR-VP_11_27_2022_S1_100cm_MT	1	1963572	1964981	1410	11625022	0.061008	arCOG00130	-	MFS_family_permease	G	COG2271	Sugar_phosphate_permease	G	-
SRVP_Atabeya-2-AMLJHBDE_19950	SRVP_Atabeya-2_1995 # 1972615 # 1973988 # -1 # ID=1_1995;partial=00;start_type=GTG;rbs_motif=AGGAG;rbs_spacer=5-10bp;gc_cont=0.490	SRVP_Atabeya-2_1995	SR-VP_11_27_2022_S1_100cm_MT	2	1972615	1973988	1374	11625022	0.125213	arCOG00771	-	CubicO_group_peptidase,_beta-lactamase_class_C_family	E	COG1680	CubicO_group_peptidase,_beta-lactamase_class_C_family	V	-
SRVP_Atabeya-2-AMLJHBDE_19970	SRVP_Atabeya-2_1997 # 1974932 # 1976797 # 1 # ID=1_1997;partial=00;start_type=ATG;rbs_motif=AGGAGG;rbs_spacer=5-10bp;gc_cont=0.479	SRVP_Atabeya-2_1997	SR-VP_11_27_2022_S1_100cm_MT	1	1974932	1976797	1866	11625022	0.0460993	arCOG00709	-	Aldehyde:ferredoxin_oxidoreductase	C	COG2414	Aldehyde:ferredoxin_oxidoreductase	C	-
SRVP_Atabeya-2-AMLJHBDE_20030	SRVP_Atabeya-2_2003 # 1980883 # 1981515 # 1 # ID=1_2003;partial=00;start_type=ATG;rbs_motif=GGAG/GAGG;rbs_spacer=5-10bp;gc_cont=0.494	SRVP_Atabeya-2_2003	SR-VP_11_27_2022_S1_80cm_MT	1	1980883	1981515	633	4000856	0.39486	arCOG00979	-	Predicted_O-methyltransferase_YrrM	R	COG4122	tRNA_5-hydroxyU34_O-methylase_TrmR/YrrM	J	tRNA_modification
SRVP_Atabeya-2-AMLJHBDE_20080	SRVP_Atabeya-2_2008 # 1985047 # 1985967 # -1 # ID=1_2008;partial=00;start_type=TTG;rbs_motif=AGGAGG;rbs_spacer=5-10bp;gc_cont=0.494	SRVP_Atabeya-2_2008	SR-VP_11_27_2022_S1_100cm_MT	8	1985047	1985967	921	11625022	0.7472	arCOG01458	Qor	NADPH:quinone_reductase_or_related_Zn-dependent_oxidoreductase	C	COG1064	D-arabinose_1-dehydrogenase,_Zn-dependent_alcohol_dehydrogenase_family	G	-
SRVP_Atabeya-2-AMLJHBDE_20090	SRVP_Atabeya-2_2009 # 1986370 # 1987185 # 1 # ID=1_2009;partial=00;start_type=ATG;rbs_motif=GGA/GAG/AGG;rbs_spacer=5-10bp;gc_cont=0.491	SRVP_Atabeya-2_2009	SR-VP_11_27_2022_S1_100cm_MT	2	1986370	1987185	816	11625022	0.210837	arCOG01648	MhpC	Alpha/beta_superfamily_hydrolase	R	COG0596	2-succinyl-6-hydroxy-2,4-cyclohexadiene-1-carboxylate_synthase_MenH_and_related_esterases,_alpha/beta_hydrolase_fold	HR	Menaquinone_biosynthesis
SRVP_Atabeya-2-AMLJHBDE_20120	SRVP_Atabeya-2_2012 # 1989303 # 1990109 # 1 # ID=1_2012;partial=00;start_type=TTG;rbs_motif=GGxGG;rbs_spacer=5-10bp;gc_cont=0.493	SRVP_Atabeya-2_2012	SR-VP_11_27_2022_S1_100cm_MT	3	1989303	1990109	807	11625022	0.319782	-	-	-	-	COG4245	Uncharacterized_conserved_protein_YegL,_contains_vWA_domain_of_TerY_type	S	-
SRVP_Atabeya-2-AMLJHBDE_20130	SRVP_Atabeya-2_2013 # 1990145 # 1991539 # 1 # ID=1_2013;partial=00;start_type=TTG;rbs_motif=GGxGG;rbs_spacer=5-10bp;gc_cont=0.480	SRVP_Atabeya-2_2013	SR-VP_11_27_2022_S1_100cm_MT	1	1990145	1991539	1395	11625022	0.061664	arCOG09477	PTC1	Serine/threonine_protein_phosphatase	T	COG0631	Serine/threonine_protein_phosphatase_PrpC	T	-
SRVP_Atabeya-2-AMLJHBDE_20150	SRVP_Atabeya-2_2015 # 1992688 # 1993545 # 1 # ID=1_2015;partial=00;start_type=TTG;rbs_motif=AGGAG;rbs_spacer=5-10bp;gc_cont=0.463	SRVP_Atabeya-2_2015	SR-VP_11_27_2022_S1_100cm_MT	1	1992688	1993545	858	11625022	0.100258	arCOG02900	-	Predicted_toxin_of_RNase_A_family,_contains_vWA_domain	V	COG4245	Uncharacterized_conserved_protein_YegL,_contains_vWA_domain_of_TerY_type	S	-
SRVP_Atabeya-2-AMLJHBDE_20160	SRVP_Atabeya-2_2016 # 1993652 # 1994701 # 1 # ID=1_2016;partial=00;start_type=ATG;rbs_motif=None;rbs_spacer=None;gc_cont=0.461	SRVP_Atabeya-2_2016	SR-VP_11_27_2022_S1_100cm_MT	4	1993652	1994701	1050	11625022	0.3277	arCOG03682	SPS1	Membrane_associated_serine/threonine_protein_kinase	T	COG3642	tRNA_A-37_threonylcarbamoyl_transferase_component_Bud32	J	tRNA_modification
SRVP_Atabeya-2-AMLJHBDE_20210	SRVP_Atabeya-2_2021 # 1996691 # 1997395 # 1 # ID=1_2021;partial=00;start_type=TTG;rbs_motif=AGGAG;rbs_spacer=5-10bp;gc_cont=0.515	SRVP_Atabeya-2_2021	SR-VP_11_27_2022_S1_100cm_MT	1	1996691	1997395	705	11625022	0.122016	arCOG02462	-	Kynurenine_formamidase	E	COG1878	Kynurenine_formamidase	E	-
SRVP_Atabeya-2-AMLJHBDE_20300	SRVP_Atabeya-2_2030 # 2003110 # 2003235 # 1 # ID=1_2030;partial=00;start_type=ATG;rbs_motif=GGA/GAG/AGG;rbs_spacer=5-10bp;gc_cont=0.421	SRVP_Atabeya-2_2030	SR-VP_11_27_2022_S1_100cm_MT	1	2003110	2003235	126	11625022	0.682709	-	-	-	-	-	-	-	-
SRVP_Atabeya-2-AMLJHBDE_20310	SRVP_Atabeya-2_2031 # 2003242 # 2004138 # 1 # ID=1_2031;partial=00;start_type=TTG;rbs_motif=GGAG/GAGG;rbs_spacer=5-10bp;gc_cont=0.485	SRVP_Atabeya-2_2031	SR-VP_11_27_2022_S1_100cm_MT	3	2003242	2004138	897	11625022	0.287697	arCOG00498	-	Metal-dependent_hydrolase_of_the_beta-lactamase_superfamily_II	R	COG0491	Glyoxylase_or_a_related_metal-dependent_hydrolase,_beta-lactamase_superfamily_II	R	-
SRVP_Atabeya-2-AMLJHBDE_20320	SRVP_Atabeya-2_2032 # 2004096 # 2004320 # -1 # ID=1_2032;partial=00;start_type=ATG;rbs_motif=GGA/GAG/AGG;rbs_spacer=5-10bp;gc_cont=0.502	SRVP_Atabeya-2_2032	SR-VP_11_27_2022_S1_100cm_MT	1	2004096	2004320	225	11625022	0.382317	-	-	-	-	-	-	-	-
SRVP_Atabeya-2-AMLJHBDE_20330	SRVP_Atabeya-2_2033 # 2004317 # 2004706 # -1 # ID=1_2033;partial=00;start_type=ATG;rbs_motif=None;rbs_spacer=None;gc_cont=0.485	SRVP_Atabeya-2_2033	SR-VP_11_27_2022_S1_100cm_MT	1	2004317	2004706	390	11625022	0.220568	arCOG01139	Rri1	Proteasome_lid_subunit_RPN8/RPN11,_contains_Jab1/MPN_domain_metalloenzyme_(JAMM)_motif	O	COG1310	Proteasome_lid_subunit_RPN8/RPN11,_contains_Jab1/MPN_domain_metalloenzyme_(JAMM)_motif	O	-
SRVP_Atabeya-2-AMLJHBDE_20420	SRVP_Atabeya-2_2042 # 2011042 # 2014413 # 1 # ID=1_2042;partial=00;start_type=TTG;rbs_motif=GGAG/GAGG;rbs_spacer=5-10bp;gc_cont=0.494	SRVP_Atabeya-2_2042	SR-VP_11_27_2022_S1_100cm_MT	62	2011042	2014413	3372	11625022	1.58165	arCOG01534	DdpA	ABC-type_transport_system,_periplasmic_component	E	COG0747	ABC-type_transport_system,_periplasmic_component	E	-
SRVP_Atabeya-2-AMLJHBDE_20430	SRVP_Atabeya-2_2043 # 2014727 # 2015635 # 1 # ID=1_2043;partial=00;start_type=ATG;rbs_motif=GGAG/GAGG;rbs_spacer=5-10bp;gc_cont=0.499	SRVP_Atabeya-2_2043	SR-VP_11_27_2022_S1_100cm_MT	2	2014727	2015635	909	11625022	0.189266	-	-	-	-	-	-	-	-
SRVP_Atabeya-2-AMLJHBDE_20500	SRVP_Atabeya-2_2050 # 2019118 # 2019771 # 1 # ID=1_2050;partial=00;start_type=ATG;rbs_motif=GGA/GAG/AGG;rbs_spacer=5-10bp;gc_cont=0.488	SRVP_Atabeya-2_2050	SR-VP_11_27_2022_S1_100cm_MT	1	2019118	2019771	654	11625022	0.131531	-	-	-	-	-	-	-	-
SRVP_Atabeya-2-AMLJHBDE_20690	SRVP_Atabeya-2_2069 # 2037396 # 2038226 # 1 # ID=1_2069;partial=00;start_type=ATG;rbs_motif=GGAG/GAGG;rbs_spacer=5-10bp;gc_cont=0.452	SRVP_Atabeya-2_2069	SR-VP_11_27_2022_S1_100cm_MT	3	2037396	2038226	831	11625022	0.310546	-	-	-	-	-	-	-	-
SRVP_Atabeya-2-AMLJHBDE_20710	SRVP_Atabeya-2_2071 # 2038726 # 2039628 # -1 # ID=1_2071;partial=00;start_type=ATG;rbs_motif=GGA/GAG/AGG;rbs_spacer=11-12bp;gc_cont=0.481	SRVP_Atabeya-2_2071	SR-VP_07_25_2022_A1_70cm_MT	1	2038726	2039628	903	125142	8.8493	arCOG01241	XerC	XerD/XerC_family_integrase	X	COG4973	Site-specific_recombinase_XerC	L	-
SRVP_Atabeya-2-AMLJHBDE_20800	SRVP_Atabeya-2_2080 # 2046565 # 2047185 # 1 # ID=1_2080;partial=00;start_type=ATG;rbs_motif=AGGAG(G)/GGAGG;rbs_spacer=13-15bp;gc_cont=0.520	SRVP_Atabeya-2_2080	SR-VP_11_27_2022_S1_100cm_MT	20	2046565	2047185	621	11625022	2.77041	-	-	-	-	-	-	-	-
SRVP_Atabeya-2-AMLJHBDE_20830	SRVP_Atabeya-2_2083 # 2048554 # 2049684 # 1 # ID=1_2083;partial=00;start_type=ATG;rbs_motif=GGAG/GAGG;rbs_spacer=5-10bp;gc_cont=0.487	SRVP_Atabeya-2_2083	SR-VP_11_27_2022_S1_100cm_MT	5	2048554	2049684	1131	11625022	0.380289	arCOG02189	NapF	HTH_containing_ranscriptional_regulator_fused_to_ferredoxin_domain	C	COG2768	Uncharacterized_Fe-S_cluster_protein	S	-
SRVP_Atabeya-2-AMLJHBDE_20900	SRVP_Atabeya-2_2090 # 2055272 # 2056141 # 1 # ID=1_2090;partial=00;start_type=TTG;rbs_motif=4Base/6BMM;rbs_spacer=13-15bp;gc_cont=0.476	SRVP_Atabeya-2_2090	SR-VP_11_27_2022_S1_100cm_MT	13	2055272	2056141	870	11625022	1.28538	arCOG10362	-	Uncharacterized_protein	S	-	-	-	-
SRVP_Atabeya-2-AMLJHBDE_20940	SRVP_Atabeya-2_2094 # 2058323 # 2058982 # 1 # ID=1_2094;partial=00;start_type=TTG;rbs_motif=GGxGG;rbs_spacer=5-10bp;gc_cont=0.491	SRVP_Atabeya-2_2094	SR-VP_11_27_2022_S1_100cm_MT	3	2058323	2058982	660	11625022	0.391006	-	-	-	-	-	-	-	-
SRVP_Atabeya-2-AMLJHBDE_20960	SRVP_Atabeya-2_2096 # 2059822 # 2060487 # -1 # ID=1_2096;partial=00;start_type=GTG;rbs_motif=AGGAGG;rbs_spacer=5-10bp;gc_cont=0.497	SRVP_Atabeya-2_2096	SR-VP_11_27_2022_S1_100cm_MT	7	2059822	2060487	666	11625022	0.904128	arCOG03580	STE14	Putative_protein-S-isoprenylcysteine_methyltransferase	O	COG2020	Protein-S-isoprenylcysteine_O-methyltransferase_Ste14	O	-
SRVP_Atabeya-2-AMLJHBDE_20970	SRVP_Atabeya-2_2097 # 2060946 # 2061554 # -1 # ID=1_2097;partial=00;start_type=ATG;rbs_motif=AGGAGG;rbs_spacer=5-10bp;gc_cont=0.488	SRVP_Atabeya-2_2097	SR-VP_11_27_2022_S1_100cm_MT	2	2060946	2061554	609	11625022	0.2825	arCOG06562	-	Membrane_protein,_predicted_component_of_type_IV_pili_like_system	N	COG4720	ECF-type_riboflavin_transporter,_membrane_(S)_component	H	-
[truncated: 2,261 more rows]

## Sheet: Supplemental Table 3
Supplemental Table S3 Yucahu-overall relative bundance calculated using all the metagenome reads and compared to the main chromosome (see methods)
[truncated: 36 more rows]

[truncated: 8 more sheets: Supplemental Table 4, Supplemental Table 6, Supplemental Table 7, Supplemental Table 8, Supplemental Table 9, Supplemental Table 10, Supplemental Table 11-A, Supplemental Table 11-C]
